# Supplementary material for: Unacceptable treatment outcomes and associated factors among India's initial cohorts of multidrug-resistant tuberculosis (MDR-TB) patients under the revised national TB control programme (2007–2011): Evidence leading to policy enhancement
Source: PLoS One. 2018 Apr 11;13(4):e0193903. doi: 10.1371/journal.pone.0193903 (PMC5894982; doi:10.1371/journal.pone.0193903)
Supplement: S1 Data — (XLSX) [file pone.0193903.s002.xlsx]

## Sheet: Sheet1
state	dps	dptbno	regyr	sex	age	district	ptbcat	ptbtyp	diagtyp	riflj	inhlj	ethalj	smlj	riflpa	inhlpa	regimen	cr4mt	cr6mt	cr12mt	treatout	hiv	remarks	dossldst	ofxdst	kmdst	etodst	ipdptype	tu	iniwt	iniwtgr	basebmi	iniht	passtdt	pasres	regch	wt6mt	wt12mt	scrinitial	scr3mo	scr6mo	ipmsdo	cpmsdo	rxepi	yrrxep	srcepi	regepi	regcat2tw	durepi	diabetes
5	1	1	2009	1	31	avr	2	6	1	1	1	2	2			Cat IV	2	2	2	6	NEGATIVE	XDR suspect sent for SLDST					1	Daryapur	40	3	13.8408	170				46	45	1.2	0.6	0.6	6	7	1	2007	GOVERNMENT	Cat II	2	6	0
5	1	2	2009	1	45	akc	2	6	1	1	1	1	1			Cat IV	2	2	1	8	NEGATIVE	XDR suspect sent for SLDST					1	Bhartiya	45	4	17.1468	162				44	44	1	0	0	78	320	1	1997	GOVERNMENT	Cat II	2	8	0
5	1	3	2009	1	24	avr	1	6	1	1	1	2	2			Cat IV	2	1	1	6	NEGATIVE	XDR suspect sent for SLDST					1	Amravati	36	3	14.0625	160				42	41	1.2	0.6	0.5	0	0	1	2008	GOVERNMENT	Cat II	2	6	0
5	1	4	2009	1	36	bld	1	6	1	1	1	2	2			Cat IV	2	2	2	4	NEGATIVE	Not Available					1	Khamgaon	41	3	13.3878	175				50	47	0.8	0	0.8	5	120	1	2008	GOVERNMENT	Cat I	2	6	0
5	1	5	2009	1	45	ytl	2	6	1	1	1	1	2			Cat IV	9	9	9	3	NEGATIVE	Not Available					1	Yavatmal	37	3	13.5905	165						0.8	0	0	10	0	1	2003	GOVERNMENT	Cat II	2	6	0
5	1	6	2009	1	35	avc	2	6	1	1	1	2	1			Cat IV	2	2	2	1	NEGATIVE	Not Available					1	Bhajibazar	36	3	12.4567	170				49	53	0.9	0.5	0	1	60	1	2007	GOVERNMENT	Cat II	2	6	0
5	1	7	2009	1	32	ytl	2	6	1	1	1	2	1			Cat IV	2	2	2	1	NEGATIVE	Not Available					1	Wani	47	4	17.9089	162				40	40	0.9	0.9	1	0	0	1	2008	GOVERNMENT	Cat II	2	2	0
5	1	8	2009	0	38	avr	2	5	1	1	1	2	1			Cat IV	2	2	2	1	NEGATIVE	Not Available					2	Daryapur	46	4	17.5278	162				49	51	1.1	0.5	0.5	6	9	1	2007	GOVERNMENT	Cat II	2	3	0
5	1	9	2009	1	55	ytl	2	6	1	1	1	1	1			Cat IV	2	2	9	4	NEGATIVE	Not Available					1	Pusad	55	4	20.202	165				54		0.5	0	0	18	89	1	2008	GOVERNMENT	Cat II	2	5	0
5	1	10	2009	0	29	akc	2	7	1	1	1	1	1			Cat IV	1	1	1	3	NEGATIVE	XDR suspect sent for SLDST					1	Bhartiya	63	4	24.6094	160				63		0.7	0	0	254	100	1	2008	GOVERNMENT	Cat II	2	1	0
5	1	11	2009	1	50	akl	2	5	1	1	1	1	1			Cat IV	2	2	2	1	NEGATIVE	Not Available					1	Telhara	45	4	17.1468	162				43	46	0.9	0	1.6	12	0	1	2003	GOVERNMENT	Cat II	2	6	0
5	1	12	2009	1	45	avr	2	6	1	1	1	2	1			Cat IV	2	2	2	1	NEGATIVE	Not Available					1	Achalpur	62	4	22.231	167				70	72	0.9	0.6	0.5	0	3	1	2005	GOVERNMENT	Cat II	2	8	0
5	1	13	2009	1	48	ytl	2	6	1	1	1	1	2			Cat IV	2	2	2	1	NEGATIVE	Not Available					1	Darwha	37	3	14.0985	162				48	49	1	0.5	0.9	6	3	1	2008	GOVERNMENT	Cat II	2	6	0
5	1	14	2009	1	23	bld	2	6	1	1	1	1	1			Cat IV	9	9	9	3	NEGATIVE	Not Available					1	Mehkar	53	4	19.0039	167						0.9	0	0	37	0	1	2007	GOVERNMENT	Cat II	2	5	0
5	1	15	2009	1	27	bld	2	5	1	1	1	2	2			Cat IV	2	2	1	6	NEGATIVE	XDR suspect sent for SLDST					1	Buldhana	40	3	13.8408	170				46	45	0.9	0	0.6	7	133	1	2007	GOVERNMENT	Cat II	2	8	0
5	1	16	2009	1	36	bld	2	7	1	1	1	1	2			Cat IV	2	2	2	1	NEGATIVE	Not Available					1	Buldhana	36	3	14.6051	157				36	39	1	0.9	0.7	3	18	1	2007	GOVERNMENT	Cat II	2	5	0
5	1	17	2009	1	55	ytl	3	6	1	1	1	1	1			Cat IV	2	2	2	1	NEGATIVE	XDR suspect sent for SLDST					1	Pandharkawada	44	3	14.8729	172				46	47	0.6	0	1.1	9	10	1	2009	GOVERNMENT	Cat II	2	8	0
5	1	18	2009	1	55	wsm	2	5	1	1	1	1	1			Cat IV	1	2	2	3	NEGATIVE	XDR suspect sent for SLDST					1	Mangrulpir	34	2	13.7937	157				35	34	1	1.4	1	1	16	1	2009	GOVERNMENT	Cat II	2	8	0
5	1	19	2009	0	30	bld	1	6	1	1	1	1	1			Cat IV	2	2	2	1	NEGATIVE	Not Available					2	Buldhana	42	3	18.6667	150		Not Applicable	Not Applicable	46	45	0.9	0.6	0.8	0	0	1	2009	GOVERNMENT	Cat II	2	3	0
5	1	20	2009	0	35	ytl	2	6	1	1	1	2	1			Cat IV	2	2	2	1	NEGATIVE	Not Available					1	Darwha	28	2	19.4444	120		Not Applicable	Not Applicable	31	29	1		1	1	80	1	2000	GOVERNMENT	Cat II	2	8	0
5	1	21	2009	0	50	bld	2	5	1	1	1	1	1			Cat IV	2	2	9	2	NEGATIVE	Not Available					1	Khamgaon	28	2	16.0698	132		Not Applicable	Not Applicable	26	27	1			23	0	1	2000	GOVERNMENT	Cat II	2	8	0
5	1	22	2009	0	26	bld	2	5	1	1	1	2	2			Cat IV	2	2	2	8	NEGATIVE	Not Available					1	Chikhali	40	3	15.2416	162		Not Applicable	Not Applicable	41	43	0.9			2	8	1	2006	GOVERNMENT	Cat II	2	8	0
5	1	23	2009	1	37	ytl	2	5	1	1	1	2	2			Cat IV	2	2	2	1	NEGATIVE	Not Available					1	Pandharkawada	32	2	12.9823	157		Not Applicable	Not Applicable	32	35	0	3.5		6	0	1	2007	GOVERNMENT	Cat II	2	8	0
5	1	24	2009	1	32	ytl	2	6	1	1	1	2	1			Cat IV	1	1	1	3	NEGATIVE	Not Available					1	Pusad	35	3	13.3364	162		Not Applicable	Not Applicable	37	37	1.4	0.9		48	84	1	2007	GOVERNMENT	Cat II	2	6	0
5	1	25	2009	1	38	wsm	2	5	1	1	1	2	2			Cat IV	2	2	2	2	NEGATIVE	Not Available					2	Mangrulpir	39	3	13.984	167		Not Applicable	Not Applicable	39	37	0.9	0.9		25	104	1	2007	GOVERNMENT	Cat II	2	8	0
5	1	26	2009	1	60	avr	2	5	1	1	1	1	1			Cat IV	2	2	2	1	NEGATIVE	Not Available					9	Amravati	40	3	14.6924	165		Not Applicable	Not Applicable	41	42	1.2	0.9	0.9	0	0	1	2006	GOVERNMENT	Cat II	2	5	0
5	1	27	2009	1	23	ytl	2	6	1	1	1	2	1			Cat IV	2	2	2	1	NEGATIVE	Not Available					9	Darwha	43	3	15.4183	167		Not Applicable	Not Applicable	47	46	0.9	1.1	1.3	0	0	1	2007	GOVERNMENT	Cat II	2	6	0
5	1	28	2009	1	35	bld	2	7	1	1	1	2	2			Cat IV	2	2	2	3	NEGATIVE	Not Available					1	Mehkar	40	3	15.2416	162		Not Applicable	Not Applicable	43		0			171	119	1	2007	GOVERNMENT	Cat II	2	4	0
5	1	29	2009	1	50	bld	2	6	1	1	1	2	2			Cat IV	2	2	2	2	NEGATIVE	Not Available					2	Khamgaon	44	3	17.1875	160		Not Applicable	Not Applicable	45	47	1.1			7	0	1	2005	GOVERNMENT	Cat II	2	4	0
5	1	30	2009	0	25	akl	2	5	1	1	1	2	2			Cat IV	9	9	9	4	NEGATIVE	Not Available					1	Telhara	40	3	15.2416	162		Not Applicable	Not Applicable			1			55	0	1	2006	GOVERNMENT	Cat II	2	7	0
5	1	31	2009	1	65	akc	2	7	1	1	1	2	2			Cat IV	2	2	1	3	NEGATIVE	XDR suspect sent for SLDST					2	Bhartiya	42	3	15.0597	167		Not Applicable	Not Applicable	44	45	0.9	1.3	1.1	2	60	1	2009	GOVERNMENT	Cat II	2	4	0
5	1	1	2010	0	22	avr	2	6	1	1	1	2	1			Cat IV	2	2	2	1	NEGATIVE	Not Available					3	Chikhaldara	40	3	14.3426	167		Not Applicable	Not Applicable	50	47	0.5	0.8	0.9	6	4	1	2008	GOVERNMENT	Cat II	2	7	0
5	1	2	2010	0	30	bld	2	5	1	1	1	2	2			Cat IV	9	9	9	4	NEGATIVE	Not Available					1	Mehkar	47	4	19.0677	157		Not Applicable	Not Applicable	46	46	0.8			188	0	1	2009	GOVERNMENT	Cat II	2	4	0
5	1	3	2010	1	16	avr	2	5	1	1	2	2	2			Cat IV	2	2	2	1	NEGATIVE	Not Available					1	Daryapur	30	2	13.8831	147		Not Applicable	Not Applicable	34	35	1.1	0.5	0.4	0	8	1	2007	GOVERNMENT	Cat II	2	8	0
5	1	4	2010	1	39	bld	2	6	1	1	1	2	1			Cat IV	2	2	2	1	NEGATIVE	Not Available					1	Khamgaon	42	3	17.0392	157		Not Applicable	Not Applicable	47	47	1	1.3	1.1	10	3	1	1997	GOVERNMENT	Cat II	2	4	0
5	1	5	2010	0	60	ytl	2	5	1	1	2	2	1			Cat IV	1	2	9	4	NEGATIVE	Not Available					9	Umarkhed	30	2	14.878	142		Not Applicable	Not Applicable	31	28	0.9	0.9	1	8	66	1	2008	GOVERNMENT	Cat II	2	5	0
5	1	6	2010	0	56	akl	2	5	1	1	1	1	1			Cat IV	1	1	1	8	NEGATIVE	XDR suspect sent for SLDST					1	Akola	37	3	15.4006	155	12/19/2010	Not Applicable	Not Applicable	35	36	0.9	1	1.4	25	11	1	2009	GOVERNMENT	Cat II	2	6	0
5	1	7	2010	0	36	akc	2	6	1	1	1	2	1			Cat IV	9	2	9	1	NEGATIVE	Not Available					9	Bhartiya	30	2	12.1709	157		Not Applicable	Not Applicable	32	32	1	1	0.8	8	0	1	2002	GOVERNMENT	Cat II	2	1	0
5	1	8	2010	1	24	avr	2	4	1	1	1	2	2			Cat IV	2	2	2	1	NEGATIVE	Not Available					1	Achalpur	50	4	17.9282	167		Not Applicable	Not Applicable	64	79	0.9	0.7	0.5	0	0	1	2009	GOVERNMENT	Cat II	2	2	1
5	1	9	2010	1	65	avc	2	6	1	1	1	2	2			Cat IV	9	9	9	3	NEGATIVE	Not Available					1	Bhajibazar	40	3	15.2416	162		Not Applicable	Not Applicable	46		0.9			122	0	1	2009	GOVERNMENT	Cat II	2	2	0
5	1	10	2010	1	43	bld	2	6	1	1	1	1	1			Cat IV	9	9	9	4	NEGATIVE	Not Available					1	Mehkar	46	4	15.5489	172		Not Applicable	Not Applicable			0			0	0	1	2009	GOVERNMENT	Cat II	2	1	0
5	1	11	2010	1	30	akl	2	6	1	1	1	1	2			Cat IV	1	2	9	4	NEGATIVE	Not Available					1	Barshitakli	50	4	17.301	170		Not Applicable	Not Applicable	51	51	1.1	1.2	1	5	122	1	2004	GOVERNMENT	Cat II	2	8	0
5	1	12	2010	1	31	ytl	2	6	1	1	1	2	2			Cat IV	2	2	9	4	NEGATIVE	Not Available					2	Yavatmal	50	4	16.901	172		Not Applicable	Not Applicable	48		0	1		6	70	1	2006	GOVERNMENT	Cat II	2	5	0
5	1	13	2010	1	24	bld	2	6	1	1	1	2	1			Cat IV	9	9	9	4	NEGATIVE	Not Available					1	Buldhana	61	4	22.4059	165		Not Applicable	Inj Km Reduce form 750 to 500 mg			0	0.9		79	0	1	2008	GOVERNMENT	Cat II	2	5	0
5	1	14	2010	1	58	akl	2	5	1	1	1	2	1			Cat IV	2	2	2	8	NEGATIVE	Not Available					1	Akola	60	4	23.4375	160		Not Applicable	Not Applicable	60	63	1.6		1.8	35	7	1	2007	GOVERNMENT	Cat II	2	3	1
5	1	15	2010	1	40	akc	2	5	1	1	2	2	2			Cat IV	9	9	9	3	POSITIVE	Not Available					10	Bhartiya	45	4	16.1354	167		Not Applicable	Not Applicable			1			47	0	1	2008	GOVERNMENT	Cat II	2	5	0
5	1	16	2010	1	23	ytl	2	6	1	1	1	2	1			Cat IV	2	2	2	1	NEGATIVE	Not Available					1	Darwha	43	3	16.3847	162		Not Applicable	Not Applicable	45	50	0.4			7	3	1	2006	GOVERNMENT	Cat II	2	3	0
5	1	17	2010	1	40	ytl	2	5	1	1	1	2	2			Cat IV	2	2	2	8	NEGATIVE	XDR suspect sent for SLDST					2	Umarkhed	41	3	16.6335	157		Not Applicable	Not Applicable	40	48	1.1	1.2		0	30	1	2009	GOVERNMENT	Cat II	2	8	0
5	1	18	2010	1	51	avc	2	5	1	1	1	2	2			Cat IV	2	1	2	8	NEGATIVE	XDR suspect sent for SLDST					1	Bhajibazar	51	4	21.2279	155		Not Applicable	Not Applicable	52	52	0.8	0.6	0.7	198	1	1	2002	GOVERNMENT	Cat II	2	8	0
5	1	19	2010	1	40	wsm	2	6	1	1	1	2	2			Cat IV	9	9	9	4	NEGATIVE	Not Available					1	Washim	36	3	14.6051	157		Not Applicable	Not Applicable			1			0	0	1	2009	GOVERNMENT	Cat II	2	5	0
5	1	20	2010	0	40	bld	2	6	1	1	1	2	2			Cat IV	2	9	9	8	NEGATIVE	Not Available					1	Jalgaon Jamod	36	3	15.5817	152		Not Applicable	Not Applicable	41	42	0.1	0.9		8	0	1	2008	GOVERNMENT	Cat II	2	8	0
5	1	21	2010	1	30	bld	2	5	1	1	1	2	1			Cat IV	2	2	2	1	NEGATIVE	Not Available					1	Buldhana	67	5	26.1719	160		Not Applicable	Not Applicable	67	67	0.6	0.5	0.9	1	14	1	2007	GOVERNMENT	Cat II	2	5	0
5	1	22	2010	1	38	avr	2	6	1	1	1	2	2			Cat IV	9	9	9	4	NEGATIVE	Not Available					1	Dharni	32	2		0		Not Applicable	Not Applicable			0.6			81	0	1	2002	GOVERNMENT	Cat II	2	9	0
5	1	23	2010	0	35	ytl	2	6	1	1	1	2	1			Cat IV	2	2	9	4	NEGATIVE	Not Available					2	Umarkhed	38	3	14.4795	162		Not Applicable	Not Applicable	38		0.7	1.3	1.4	52	62	1	2008	GOVERNMENT	Cat II	2	4	0
5	1	24	2010	1	45	bld	2	6	1	1	2	2	2			Cat IV	1	2	9	8	NEGATIVE	XDR suspect sent for SLDST					1	Buldhana	36	3	16	150		Not Applicable	Not Applicable	40	36	0.7			84	105	1	2005	GOVERNMENT	Cat II	2	2	0
5	1	25	2010	0	30	akl	2	6	1	1	1	1	1			Cat IV	1	1	1	8	NEGATIVE	XDR suspect sent for SLDST					1	Barshitakli	38	3	14.8438	160		Not Applicable	Not Applicable	37	39	1.6	0.8	0.7	0	0	1	2007	GOVERNMENT	Cat II	2	5	0
5	1	26	2010	1	40	avc	2	7	1	1	1	2	2			Cat IV	2	1	9	4	NEGATIVE	Not Available					2	Bhajibazar	42	3	14.1969	172		Not Applicable	Not Applicable	43	43	0.6		0.6	181	58	1	2007	GOVERNMENT	Cat II	2	8	0
5	1	27	2010	1	60	avc	2	6	1	1	1	2	1			Cat IV	2	1	9	8	NEGATIVE	Not Available					9	Bhajibazar	40	3	14.3426	167		Not Applicable	Not Applicable	41	38	0.8	0.5	0.6	98	107	1	2003	GOVERNMENT	Cat II	2	4	0
5	1	28	2010	1	65	akl	2	5	1	1	1	2	2			Cat IV	2	1	1	8	NEGATIVE	XDR suspect sent for SLDST					1	Barshitakli	40	3	15.625	160		Not Applicable	Not Applicable		45	1.6		1.6	33	21	1	2008	GOVERNMENT	Cat II	2	9	0
5	1	29	2010	1	70	akl	2	6	1	1	1	1	2			Cat IV	1	1	1	3	NEGATIVE	XDR suspect sent for SLDST					1	Akola	38	3	15.8169	155	10/20/2010	Renal Parameteres Deranged	Not Applicable	39	37	1.6	2.9		57	5	1	2009	GOVERNMENT	Cat I	2	7	0
5	1	30	2010	0	32	avc	2	6	1	1	1	2	2			Cat IV	2	2	2	8	NEGATIVE	Not Available					1	Bhajibazar	23	1	10.2222	150		Not Applicable	Not Applicable	24	28	0.6	0.6	0.5	1	2	1	2005	GOVERNMENT	Cat II	2	5	0
5	1	31	2010	1	62	akl	2	6	1	1	1	2	1			Cat IV	2	2	2	8	NEGATIVE	XDR suspect sent for SLDST					1	Barshitakli	42	3	18.6667	150	10/22/2010	Loss of Hearing	Not Applicable	43	44	1.1	0.7	1.1	1	2	1	2008	GOVERNMENT	Cat II	2	5	0
5	1	32	2010	1	28	wsm	2	5	1	1	1	1	1			Cat IV	9	9	9	4	NEGATIVE	Not Available					2	Mangrulpir	46	4	14.6829	177		Not Applicable	Not Applicable			1.6			77	0	1	2004	GOVERNMENT	Cat II	2	6	0
5	1	33	2010	1	50	bld	2	5	1	1	1	2	2			Cat IV	2	2	9	8	NEGATIVE	XDR suspect sent for SLDST					1	Khamgaon	45	4	17.1468	162		Not Applicable	Not Applicable	50	49	0.7	1.8	1	1	1	1	2002	GOVERNMENT	Cat II	2	8	0
5	1	34	2010	1	40	ytl	2	6	1	1	1	2	1			Cat IV	1	1	1	8	NEGATIVE	XDR suspect sent for SLDST					1	Yavatmal	40	3	14.1723	168		Not Applicable	Not Applicable	40	44	1.2	1.1	1	22	35	1	2001	GOVERNMENT	Cat I	2	5	0
5	1	35	2010	1	38	ytl	2	7	1	1	1	2	1			Cat IV	2	2	2	8	NEGATIVE	Not Available					2	Yavatmal	40	3	15.2416	162		Not Applicable	Not Applicable	53	51	1.3	1.2		0	0	1	2005	GOVERNMENT	Cat II	2	4	0
5	1	36	2010	1	36	wsm	1	6	1	1	1	2	2			Cat IV	2	9	9	8	NEGATIVE	Not Available					1	Mangrulpir	39	3	16.8802	152		Not Applicable	Not Applicable	40	40	1			300	0	1	2009	GOVERNMENT	Cat I	2	7	0
5	1	37	2010	1	28	wsm	2	6	1	1	1	2	2			Cat IV	2	2	2	8	NEGATIVE	Not Available					1	Washim	65	5	21.9713	172		Not Applicable	Not Applicable	67	82	0.9	0.9	0.8	0	0	1	2009	GOVERNMENT	Cat II	2	5	0
5	1	38	2010	1	35	ytl	2	6	1	1	1	1	2			Cat IV	2	2	2	8	NEGATIVE	Not Available					11	Pusad	50	4	16.901	172		Not Applicable	Not Applicable	51	51	1.2		1.3	0	0	1	2007	GOVERNMENT	Cat II	2	1	0
5	1	39	2010	1	50	bld	2	6	1	1	1	1	1			Cat IV	9	9	9	4	NEGATIVE	Not Available					1	Buldhana	49	4	17.5697	167		Not Applicable	Not Applicable			0.9			66	0	1	2009	GOVERNMENT	Cat II	2	4	0
5	1	40	2010	1	57	bld	2	5	1	1	1	2	1			Cat IV	2	2	9	3	NEGATIVE	Not Available					1	Buldhana	67	5	21.3859	177		Not Applicable	Not Applicable	62	62	0.8	1	1.7	11	4	1	2008	GOVERNMENT	Cat II	2	9	1
5	1	41	2010	1	28	akl	2	6	1	1	1	2	1			Cat IV	9	9	9	4	NEGATIVE	Not Available					2	Akola	50	4	16.901	172		Not Applicable	Not Applicable			1			61	0	1	2009	GOVERNMENT	Cat II	2	6	0
5	1	42	2010	1	27	ytl	2	5	1	1	1	2	2			Cat IV	2	2	2	8	NEGATIVE	Not Available					1	Ralegaon	59	4	23.0469	160		Not Applicable	Not Applicable	59	60	1	1	1.5	0	0	1	2009	GOVERNMENT	Cat II	2	8	0
5	1	43	2010	0	18	ytl	2	6	1	1	1	2	2			Cat IV	2	2	2	8	NEGATIVE	Not Available					1	Pandharkawada	44	3	17.8506	157		Not Applicable	Not Applicable	46	46	0.9	0.8	0.6	0	0	1	2006	GOVERNMENT	Cat II	2	8	0
5	1	44	2010	0	27	wsm	2	7	1	1	1	1	2			Cat IV	2	1	2	8	NEGATIVE	XDR suspect sent for SLDST					1	Washim	35	3	14.1994	157		Not Applicable	Not Applicable	37	36	0.9	0.8	0.8	0	5	1	2008	GOVERNMENT	Cat II	2	8	0
5	1	45	2010	1	36	bld	2	5	1	1	1	1	1			Cat IV	9	2	2	8	NEGATIVE	Not Available					1	Mehkar	34	2	11.7647	170		Not Applicable	Not Applicable	36	36	1.3			56	8	1	2006	GOVERNMENT	Cat II	2	4	0
5	1	46	2010	0	30	ytl	2	5	1	1	1	1	1			Cat IV	9	9	9	3	NEGATIVE	Not Available					1	Umarkhed	31	2	14.3459	147		Not Applicable	Not Applicable			1.2			7	0	1	2007	GOVERNMENT	Cat II	2	3	0
5	1	47	2010	1	28	bld	2	6	1	1	1	1	1			Cat IV	2	2	9	8	NEGATIVE	XDR suspect sent for SLDST					1	Khamgaon	35	3	14.1994	157		Not Applicable	Not Applicable	39	43	0.9		1.2	22	0	1	2009	GOVERNMENT	Cat II	2	7	0
5	1	48	2010	1	25	bld	2	6	1	1	1	2	2			Cat IV	9	9	9	8	NEGATIVE	Not Available					1	Khamgaon	40	3	13.0612	175		Not Applicable	Not Applicable	45	44	0.7			17	0	1	2009	GOVERNMENT	Cat II	2	8	0
5	1	49	2010	1	35	bld	2	6	1	1	1	2	2			Cat IV	9	9	1	8	NEGATIVE	XDR suspect sent for SLDST					1	Mehkar	42	3	15.427	165		Not Applicable	Not Applicable	44	44	0.8	0.5	1.9	30	0	1	2007	GOVERNMENT	Cat II	2	7	0
5	1	50	2010	0	65	akc	2	6	1	1	1	1	1			Cat IV	2	2	9	4	NEGATIVE	Not Available					9	Bhartiya	27	2	12.8419	145		Not Applicable	Not Applicable	27		0.8	1.4		7	69	1	2007	GOVERNMENT	Cat II	2	6	0
5	1	51	2010	1	32	bld	2	6	1	1	2	2	2			Cat IV	2	9	9	8	NEGATIVE	Not Available					1	Jalgaon Jamod	56	4	22.719	157		Not Applicable	Not Applicable	70		1.3			30	0	1	2001	GOVERNMENT	Cat II	2	4	0
5	1	52	2010	1	32	ytl	1	6	1	1	1	2	2			Cat IV	2	2	1	3	NEGATIVE	Not Available					1	Ralegaon	42	3	15.427	165		Not Applicable	Not Applicable	49	47	1.2	0.7	0.8	7	9	1	2009	GOVERNMENT	Cat II	2	8	0
5	1	53	2010	0	20	avr	2	6	1	1	1	1	2			Cat IV	1	1	9	3	NEGATIVE	XDR suspect sent for SLDST					1	Dharni	30	2	13.3333	150		Not Applicable	Not Applicable	30	26	0.5	0.6	0.4	43	0	1	2003	GOVERNMENT	Cat II	2	6	0
5	1	54	2010	0	35	akl	1	6	1	1	2	2	2			Cat IV	1	1	9	3	NEGATIVE	Not Available					1		28	2	12.4444	150		Not Applicable	Not Applicable	31		0.7	1		54	0	1	2009	GOVERNMENT	Cat II	2	1	0
5	1	55	2010	1	38	bld	2	6	1	1	1	2	1			Cat IV	9	9	9	8	NEGATIVE	Not Available					1	Khamgaon	43	3	16.7969	160		Not Applicable	Not Applicable	42	47	0.9	1.1		10	2	1	2005	GOVERNMENT	Cat II	2	8	0
5	1	56	2010	1	24	bld	2	5	1	1	1	2	1			Cat IV	9	2	2	8	NEGATIVE	Not Available					2	Khamgaon	41	3	14.7011	167		Not Applicable	Not Applicable	41	43	1	0.9		29	0	1	2006	GOVERNMENT	Cat II	2	9	0
5	1	57	2010	1	50	akc	2	6	1	1	1	2	1			Cat IV	2	2	2	8	NEGATIVE	Not Available					9	Bhartiya	53	4	19.0039	167		Not Applicable	Not Applicable	53	56	1.3	1.6	1.5	10	6	1	2009	GOVERNMENT	Cat II	2	2	0
5	1	1	2011	1	26	bld	2	6	1	1	1	1	1			Cat IV	9	2	9	4	NEGATIVE	Not Available					1	Chikhali	60	4	19.1516	177		Not Applicable	Not Applicable	62		0.8			133	0	1	2008	GOVERNMENT	Cat II	2	8	0
5	1	2	2011	1	45	bld	2	6	1	1	1	2	1			Cat IV	9	9	9	3	NEGATIVE	Not Available					2	Buldhana	37	3	13.2669	167		Not Applicable	Not Applicable			0.8			9	0	1	2005	GOVERNMENT	Cat II	2	4	0
5	1	3	2011	1	30	avr	2	5	1	1	1	1	1			Cat IV	2	2	2	8	NEGATIVE	Not Available					2	Amravati	48	4	15.6735	175		Not Applicable	Not Applicable	50	52	0.5	0.6	0.6	0	0	1	2010	GOVERNMENT	Cat II	2	5	0
5	1	4	2011	1	64	bld	2	5	1	1	1	1	1			Cat IV	9	9	9	4	NEGATIVE	Not Available					1	Jalgaon Jamod	37	3	14.4531	160		Not Applicable	Not Applicable			1.4			82	0	1	2009	GOVERNMENT	Cat II	2	2	0
5	1	5	2011	1	28	akc	2	7	1	1	1	2	2			Cat IV	9	9	9	4	NEGATIVE	Not Available					10	Bhartiya	61	4	20.6193	172		Not Applicable	Not Applicable			1	1.2		128	0	1	2009	GOVERNMENT	Cat II	2	4	0
5	1	6	2011	1	30	avr	2	6	1	1	1	2	2			Cat IV	2	2	2	8	NEGATIVE	Not Available					9	Daryapur	37	3	14.0985	162		Not Applicable	Not Applicable	38	39	0.6	0.8	0.5	0	13	1	1999	GOVERNMENT	Cat II	2	5	0
5	1	7	2011	0	27	bld	2	6	1	1	1	2	2			Cat IV	9	2	9	8	NEGATIVE	Not Available					1	Jalgaon Jamod	37	3	17.1225	147		Not Applicable	Not Applicable	40		0.6		0.7	40	0	1	2010	GOVERNMENT	Cat I	2	8	0
5	1	8	2011	1	35	ytl	2	5	1	1	1	2	2			Cat IV	2	2	2	8	NEGATIVE	Not Available					1	Pusad	51	4	17.239	172		Not Applicable	Not Applicable	51		0.9	0.8	1.1	0	0	1	2007	GOVERNMENT	Cat II	2	8	0
5	1	9	2011	1	20	akl	1	6	1	1	1	2	2			Cat IV	2	2	2	8	NEGATIVE	Not Available					1	Akola	48	4	21.3333	150		Not Applicable	Not Applicable	49		1.3	1.7	1.2	14	0	1	2010	GOVERNMENT	Cat I	2	5	0
5	1	10	2011	1	56	akc	2	5	3					1	1	Cat IV	9	9	9	3	NEGATIVE	Not Available					9	Bhartiya	40	3	15.2416	162		Not Applicable	Not Applicable	36		1.3		1	107	0	1	2005	GOVERNMENT	Cat II	2	8	0
5	1	11	2011	0	22	bld	2	5	1	1	1	2	2			Cat IV	9	2	9	8	NEGATIVE	Not Available					1	Khamgaon	35	3	14.5682	155		Not Applicable	Not Applicable	36	40	1			14	0	1	2008	PRIVATE	Cat II	2	8	0
5	1	12	2011	0	42	wsm	2	5	1	1	1	2	2			Cat IV	1	2	3	3	NEGATIVE	Not Available					1	Washim	24	1	13.1687	135		Not Applicable	Not Applicable	24	25	0.6	1.2	0.7	21	0	1	2009	GOVERNMENT	Cat II	2	6	0
5	1	13	2011	1	30	bld	2	5	1	1	1	2	2			Cat IV	9	9	9	4	NEGATIVE	Not Available					1	Buldhana	45	4	16.5289	165		Not Applicable	Not Applicable			1			89	0	1	2001	GOVERNMENT	Cat II	2	8	0
5	1	14	2011	1	27	akl	2	7	3					1	1	Cat IV	9	9	9	4	NEGATIVE	Not Available					2	Akola	57	4	18.6122	175		Not Applicable	Not Applicable			1.6			83	0	1	2010	GOVERNMENT	Cat II	2	7	0
5	1	15	2011	1	23	avr	1	6	3					1	1	Cat IV	2	2	9	8	NEGATIVE	Not Available					2	Morshi	64	4	25	160		Not Applicable	Not Applicable	67		0.6	0.6	0.6	7	15	1	2010	GOVERNMENT	Cat II	2	5	0
5	1	16	2011	1	50	bld	2	6	1	1	1	2	1			Cat IV	2	2	2	8	NEGATIVE	Not Available					1	Buldhana	38	3	16.8889	150		Not Applicable	Not Applicable	40		1.2		0.6	44	0	1	2005	GOVERNMENT	Cat II	2	8	0
5	1	17	2011	1	20	avr	1	6	3					1	1	Cat IV	2	2	9	8	NEGATIVE	Not Available					1	Daryapur	56	4	18.2857	175		Not Applicable	Not Applicable	59		0.1	0.8	0.6	0	0	1	2010	GOVERNMENT	Cat II	2	3	0
5	1	18	2011	0	22	akl	2	5	1	1	1	1	1			Cat IV	2	2	9	8	NEGATIVE	Not Available					2	Telhara	31	2	12.9032	155		Not Applicable	Not Applicable	35		1	0.5	1.1	0	0	1	2003	GOVERNMENT	Cat II	2	4	0
5	1	19	2011	0	20	ytl	2	6	1	1	1	2	1			Cat IV	2	2	2	8	POSITIVE	Not Available					1	Pusad	40	3	16.6493	155		Not Applicable	Not Applicable	40		1.6	0.5	0.8	0	0	1	2008	GOVERNMENT	Cat II	2	8	0
5	1	20	2011	0	25	avc	2	6	3					1	1	Cat IV	1	9	9	4	NEGATIVE	Not Available					1	Bhajibazar	30	2	13.3333	150		Not Applicable	Not Applicable	31		0.5	0.6		99	0	1	2002	GOVERNMENT	Cat II	2	8	0
5	1	21	2011	0	65	wsm	1	6	1	1	1	2	2			Cat IV	1	2	9	8	NEGATIVE	Not Available					2	Washim	30	2	14.2687	145		Not Applicable	Not Applicable	31		1.7	1.1	1.8	173	0	1	2008	GOVERNMENT	Cat I	2	6	0
3	2	1	2007	1	42	AMC	2	6	1	1	1	1	1			Cat IV	2	9	2	1	NEGATIVE						9	LGH HOSPITAL	43	3	17.6693	156		NA	CS STOP	45	44	0.5	0.4	0.6	0	0	3	1994	GOVERNMENT	HRZE, CAT2 TWICE	1	24	0
3	2	2	2007	1	22	AMC	2	6	1	1	1	1	1			Cat IV	2	9	1	3	NEGATIVE						10	SOUTH ZONE	33	2	11.9756	166		NA	NA	40	36	0.6	0.6	0.7	0	35	2	2006	GOVERNMENT	CAT1, CAT2	2	12	0
3	2	3	2007	1	40	AMC	2	6	1	1	1	1	2			Cat IV	2	9	2	1	NEGATIVE						10	SOUTH ZONE	40	3	14.0051	169	2008-05-03	ADR	Kanamycin Stopped	44	44	0.6	0.7	0.7	0	2	1	2006	GOVERNMENT	CAT2	2	7	0
3	2	4	2007	1	40	AMC	2	7	1	1	1	1	1			Cat IV	2	9	2	1	NEGATIVE						4	NORTH CENTRAL	41	3	14.5266	168		NA	NA	48	52	0.8	1	0.9	0	8	3	2004	GOVERNMENT	CAT1, CAT2 TWICE	1	22	0
3	2	5	2007	1	24	AMC	2	5	1	1	1	1	1			Cat IV	2	9	2	1	NEGATIVE						10	NORTH ZONE	43	3	13.2716	180		NA	NA	48	50	0.7	0.8	1	6	43	2	2005	GOVERNMENT	CAT1, CAT2	2	11	0
3	2	6	2007	1	37	AMC	2	7	1	1	1	1	1			Cat IV	2	2	2	1	NEGATIVE						10	CENTRAL ZONE	36	3	12.4567	170		NA	NA						0	0	5	1992	GOVERNMENT	SHREZ	2	44	0
3	2	7	2007	0	30	AMC	2	7	1	1	1	1	1			Cat IV	1	4	4	4	NEGATIVE						9	LGH HOSPITAL	30	2	12.8156	153		NA	NA	30		0.9	0.8	0.7	3	0	4	2004	GOVERNMENT	SHREZ 3	2	34	0
3	2	8	2007	1	20	AMC	2	6	1	1	1	1	2			Cat IV	1	4	4	4	NEGATIVE						10	AMRAIWADI	35	3	12.8558	165		NA	NA	38		0.9	0.6		45	0	2	2005	GOVERNMENT	CAT1, CAT2	2	13	0
3	2	9	2007	1	41	AMC	2	7	1	1	1	2	1			Cat IV	2	2	2	1	NEGATIVE						10	CHANDLODIA	40	3	14.1723	168		NA	NA	45	45	0.6	0.6	0.9	2	0	3	1998	GOVERNMENT	CAT2	2	21	0
3	2	10	2007	1	46	AMC	2	6	1	1	1	1	1			Cat IV	2	4	4	4	NEGATIVE						10	CENTRAL ZONE	43	3	15.2353	168		NA	NA	50		0.6			5	0	3	2005	PRIVATE	HRZE;CAT2 TWICE	1	23	0
3	2	11	2007	1	41	AMC	2	5	1	1	1	1	1			Cat IV	2	9	2	1	NEGATIVE						6	LGH HOSPITAL	50	4	15.605	179	2008-05-06	ADR	Ethionamide Stopped	52	54	0.9	0.1	0.8	0	0	2	2006	GOVERNMENT	CAT1, CAT2	2	11	0
3	2	12	2007	1	20	AMC	2	7	1	1	1	1	1			Cat IV	1	3	3	3	NEGATIVE						10	SOUTH ZONE	35	3	11.8307	172		NA	NA			1	0.9		16	0	4	2005	GOVERNMENT	CAT1, CAT2 THRICE	1	16	0
3	2	13	2007	1	35	AMC	2	6	1	1	1	1	1			Cat IV	1	9	1	6	NEGATIVE						10	NORTH ZONE	50	4	21.3593	153		NA	NA	55	60	1.1	0.9	0.7	14	8	3	2004	GOVERNMENT	CAT2, THRICE	1	16	0
3	2	14	2007	0	17	AMC	2	6	1	1	1	1	1			Cat IV	1	2	1	6	NEGATIVE						10	LGH HOSPITAL	27	2	11.534	153		NA	NA	32	36	0.7	0.9	0.6	0	2	2	2006	GOVERNMENT	CAT1, CAT2	2	13	0
3	2	15	2007	0	21	AMC	2	7	1	1	1	2	1			Cat IV	1	9	3	3	NEGATIVE						4	LGH HOSPITAL	31	2	13.0713	154		NA	NA	31		0.7	1	0.5	0	0	2	2004	GOVERNMENT	CAT1, CAT2	2	11	0
3	2	16	2007	0	35	AMC	2	6	1	1	1	1	2			Cat IV	2	9	2	1	NEGATIVE						9	LGH HOSPITAL	40	3	15.0551	163		NA	NA	54	58	0.6	0.9	0.7	0	0	5	2000	GOVERNMENT	HRZES	2	38	0
3	2	17	2007	0	45	AMC	2	9	1	1	1	1	1			Cat IV	1	9	2	1	NEGATIVE						10	CHANDLODIA	38	3	16.2331	153		NA	NA	46	45	0.7	0.8	0.9	0	0	4	2004	GOVERNMENT	CAT1, CAT2 THRICE	1	25	0
3	2	18	2007	0	35	AMC	2	6	1	1	1	1	1			Cat IV	1	9	1	3	NEGATIVE						9	MEMNAGAR	35	3	14.382	156	5/25/2009	Registance in SLD	Ethionamide & OF Stopped	40	43	0.6	0.7	1	10	51	2	2005	GOVERNMENT	CAT1, CAT2 TWICE	1	22	0
3	2	19	2007	1	55	AMC	2	7	1	1	1	1	2			Cat IV	2	9	2	1	NEGATIVE						10	NORTH ZONE	45	4	19.2234	153		NA	NA	54	55	0.6	0.9	0.9	26	9	2	2005	GOVERNMENT	CAT2 TWICE	1	14	1
3	2	20	2007	0	16	AMC	2	6	1	1	1	2	1			Cat IV	2	9	2	1	NEGATIVE						10	AMRAIWADI	37	3	15.8059	153		NA	NA	42	45	0.9	1	0.7	0	3	1	2003	PRIVATE	HRZE	2	36	0
3	2	21	2007	0	24	AMC	2	7	1	1	1	1	2			Cat IV	1	2	2	1	NEGATIVE						4	WEST ZONE	36	3	13.2231	165		NA	NA	44	46	1.1	0.6	0.7	0	0	3	2005	GOVERNMENT	CAT1, CAT2	2	18	0
3	2	22	2007	1	19	AMC	2	7	1	1	1	1	1			Cat IV	9	1	1	3	NEGATIVE						10	SOUTH ZONE	37	3	13.5905	165		NA	NA	38	38	0.5	0.6	0.5	0	30	3	2005	PRIVATE	CAT2 TWICE	1	12	0
3	2	23	2007	0	32	AMC	2	6	1	1	1	1	1			Cat IV	2	9	2	2	NEGATIVE						10	CENTRAL ZONE	45	4	21.1109	146		NA	NA	55	55	0.5	0.7	0.6	0	0	2	2006	GOVERNMENT	CAT1, CAT2	2	14	0
3	2	24	2007	0	25	AMC	2	7	1	1	1	1	1			Cat IV	2	2	2	1	NEGATIVE						9	AMRAIWADI	43	3	18.369	153		NA	NA	54	63	0.7	0.8	0.9	0	0	2	2004	PRIVATE	HRZE CAT2	2	8	0
3	2	25	2007	0	42	AMC	2	7	1	1	1	1	1			Cat IV	1	1	4	4	NEGATIVE						10	SOUTH ZONE	33	2	14.2832	152		NA	NA	35		0.8	0.9	0.9	0	0	3	2003	PRIVATE	HRZE,CAT2TWICE	1	10	0
3	2	26	2007	1	17	AMC	2	5	1	1	1	1	1			Cat IV	2	2	2	1	NEGATIVE						10	EAST ZONE	44	3	16.3593	164	2007-05-11	ADR	Ethionamide & OF Stopped	45	45	0.6	0.8	0.8	0	4	2	2005	GOVERNMENT	CAT3, CAT2	2	10	0
3	2	27	2007	0	46	AMC	2	6	1	1	1	2	2			Cat IV	2	3	3	3	NEGATIVE						10	LGH HOSPITAL	33	2	13.9147	154		NA	Ethionamide & Z Stopped			0.9	0.8		0	0	3	2005	GOVERNMENT	CAT1, CAT2 TWICE	1	20	0
3	2	28	2007	1	22	AMC	2	6	1	1	1	2	1			Cat IV	2	2	9	1	POSITIVE						10	CHANDLODIA	40	3	14.8721	164		NA	NA	44	45	0.5	0.8	0.9	0	0	3	2002	GOVERNMENT	CAT2 TWICE	1	21	0
3	2	29	2007	0	25	AMC	2	6	1	1	1	2	2			Cat IV	2	2	2	1	NEGATIVE						4	EAST ZONE	35	3	15.5556	150		NA	NA	37	39	0.7	0.8	0.9	1	0	2	2006	GOVERNMENT	CAT1, CAT2	2	14	0
3	2	30	2007	1	34	AMC	2	5	1	1	1	2	2			Cat IV	2	2	2	6	NEGATIVE						9	CHANDLODIA	41	3	13.6991	173	4/25/2009	Registance in SLD	OF Stopped	45	45	1	0.9	0.9	0	0	2	1987	GOVERNMENT	CAT1, CAT2	2	13	0
3	2	31	2007	1	26	AMC	2	5	1	1	1	2	1			Cat IV	9	1	1	6	NEGATIVE						10	NORTH CENTRAL	42	3	16.6133	159		NA	NA	49	52	1	0.7	0.7	0	0	4	2001	GOVERNMENT	CAT1, CAT2 THRICE	1	30	0
3	2	32	2007	1	52	AMC	2	6	1	1	1	2	1			Cat IV	9	1	1	3	NEGATIVE						10	SCL HOSPITAL	35	3	15.1489	152		NA	NA	39	37	0.8	0.9	0.7	29	2	3	2005	GOVERNMENT	CAT2 TWICE	1	25	0
3	2	33	2007	0	40	AMC	2	7	1	1	1	2	1			Cat IV	1	9	2	6	NEGATIVE						10	LGH HOSPITAL	40	3	16.2278	157		NA	NA	55	56	0.5	0.1	0.1	2	1	3	2003	PRIVATE	HRZES AND CAT 2UNKNOWN29 MNTHS	1	13	0
3	2	34	2007	1	40	AMC	2	7	1	1	1	1	1			Cat IV	1	1	1	6	NEGATIVE						10	WEST ZONE	43	3	14.2027	174		NA	NA	46	47	1	0.7	0.9	52	13	2	2005	GOVERNMENT	CAT2	2	9	0
3	2	35	2007	1	47	AMC	2	7	1	1	1	1	1			Cat IV	2	9	2	1	NEGATIVE						4	WEST ZONE	44	3	15.2249	170		NA	NA	50	50	1	0.8	0.8	45	30	2	2006	PRIVATE	HRZES OFLOX	2	14	0
3	2	36	2007	1	22	AMC	2	7	1	1	1	1	1			Cat IV	1	1	1	4	NEGATIVE						10	EAST ZONE	40	3	13.2118	174	6/26/2008	ADR	Kanamycin Stopped	45	44	1	1	0.9	5	37	4	2006	PRIVATE	HRZE	2	8	0
3	2	37	2007	1	25	AMC	2	6	1	1	1	1	1			Cat IV	2	2	4	4	NEGATIVE						4	EAST ZONE	49	4	16	175		NA	NA	50	50	0.3	0.6	0.6	5	7	3	2005	PRIVATE	HRZE CAT2 TWICE	1	15	0
3	2	38	2007	1	30	AMC	2	6	1	1	1	1	1			Cat IV	9	1	3	3	NEGATIVE						10	EAST ZONE	34	2	11.4927	172		NA	NA	30		0.6	0.7	0.9	3	1	2	2005	GOVERNMENT	CAT3, CAT2	2	12	0
3	2	39	2007	1	20	AMC	2	7	1	1	1	1	1			Cat IV	9	2	2	1	NEGATIVE						10	EAST ZONE	39	3	13.0308	173		NA	NA	41	43	0.7	0.5	0.6	0	8	2	2006	PRIVATE	HRZE ETHIO	2	10	0
3	2	40	2007	1	35	AMC	2	7	1	1	1	2	1			Cat IV	2	2	3	3	NEGATIVE						10	NORTH CENTRAL	35	3	12.8558	165	6/30/2008	ADR( Behavioural changes)	CS and OF Stopped	36	32	0.9	0.6	0.9	50	46	3	2004	GOVERNMENT	CAT1, CAT2	2	20	0
3	2	41	2007	1	22	AMC	2	6	1	1	1	1	1			Cat IV	2	2	2	1	NEGATIVE						10	NORTH CENTRAL	39	3	12.8815	174		NA	CS STOP	45	46	0.4	0.4	0.4	0	0	2	2006	GOVERNMENT	CAT1, CAT2	2	10	0
3	2	42	2007	0	19	AMC	2	6	1	1	1	1	1			Cat IV	2	2	2	1	NEGATIVE						10	AMRAIWADI	34	2	14.9116	151		NA	NA	38	39	0.7	0.7	0.8	0		3	2004	GOVERNMENT	CAT1, CAT2 TWICE	1	19	0
3	2	43	2007	1	52	AMC	2	7	1	1	1	1	1			Cat IV	2	2	2	3	NEGATIVE						9	SOUTH ZONE	37	3	12.8028	170		NA	NA	41	38	0.7	0.6	0.6	0	22	2	2006	PRIVATE	CAT2	2	11	0
3	2	44	2007	1	20	AMC	2	6	1	1	1	1	1			Cat IV	2	2	2	1	NEGATIVE						4	EAST ZONE	35	3	13.0131	164		NA	NA	37	37	0.5	1	0.9	0	8	3	2004	GOVERNMENT	CAT1, CAT2 TWICE	1	20	0
3	2	45	2007	0	35	AMC	2	7	1	1	1	2	1			Cat IV	4	4	4	4	NEGATIVE						10	EAST ZONE	53	4	22.0604	155		NA	NA			0.5			0	0	3	1995	GOVERNMENT	CAT1, CAT2	2	11	0
3	2	46	2007	0	51	AMC	2	6	1	1	1	1	1			Cat IV	2	2	2	4	NEGATIVE						4	SOUTH ZONE	40	3	17.7778	150		NA	NA	47	55	0.7	0.8	0.7	2	45	3	2003	GOVERNMENT	CAT1, CAT2 TWICE	1	22	0
3	2	47	2007	1	34	AMC	2	6	1	1	1	1	1			Cat IV	2	2	3	3	NEGATIVE						10	LGH HOSPITAL	35	3	11.9695	171		NA	NA	38		0.6	0.9	0.9	2	2	2	2005	GOVERNMENT	CAT1, CAT2 TWICE	1	26	0
3	2	48	2007	1	32	AMC	2	5	1	1	1	1	1			Cat IV	2	2	2	1	NEGATIVE						4	LGH HOSPITAL	45	4	14.5274	176		NA	NA	48	47	0.5	0.5	0.7	0	0	5	1995	GOVERNMENT	CAT1, CAT2 THRICE	1	30	0
3	2	49	2007	0	45	AMC	2	6	1	1	1	1	1			Cat IV	2	2	2	1	NEGATIVE						3	EAST ZONE	35	3	14.382	156		NA	NA	31	34	0.8	0.9	0.7	0	0	5	1997	GOVERNMENT	CAT1, CAT2 FOUR TIMES	1	40	0
3	2	50	2007	1	50	AMC	2	6	1	1	1	1	1			Cat IV	2	2	4	4	NEGATIVE						10	LGH HOSPITAL	49	4	17.5697	167		NA	NA	54		0.6	0.7	1	0	0	4	1987	PRIVATE	CAT2	2	20	0
3	2	51	2007	0	21	AMC	2	6	1	1	1	1	1			Cat IV	2	2	2	1	NEGATIVE						9	SOUTH ZONE	35	3	16.6468	145		NA	NA	27	29	0.7	0.9	1	0	0	3	2004	GOVERNMENT	CAT1, CAT2 TWICE	1	22	0
3	2	52	2007	1	40	AMC	2	5	1	1	1	1	1			Cat IV	2	2	4	4	NEGATIVE						10	AMRAIWADI	41	3	14.8788	166		NA	NA	43	44	0.7	0.8	0.7	1	30	3	1997	PRIVATE	HRZE CAT1 CAT2	2	16	0
3	2	53	2007	1	33	AMC	2	6	1	1	1	1	1			Cat IV	2	2	2	1	NEGATIVE						3	EAST ZONE	49	4	19.1406	160		NA	NA	55	55	0.9	0.7	0.7	19	50	6	1997	GOVERNMENT	ND1 THRICE CAT2	1	53	0
3	2	54	2007	1	43	AMC	2	5	1	1	1	1	1			Cat IV	2	2	2	1	NEGATIVE						4	WEST ZONE	42	3	15.427	165		NA	NA	49	50	0.8	0.7	0.7	0	45	3	2004	GOVERNMENT	CT1, CAT 2 TWICE	1	18	0
3	2	55	2007	1	37	AMC	2	6	1	1	1	1	1			Cat IV	1	1	2	1	POSITIVE						10	AMRAIWADI	36	3	19.4637	136		NA	NA	41	44	0.9	0.7	0.7	0	0	4	2005	GOVERNMENT	CAT2 THRICE	2	26	0
3	2	56	2007	1	26	AMC	2	5	1	1	1	1	1			Cat IV	2	9	1	4	NEGATIVE						10	SOUTH ZONE	48	4	17.4191	166		NA	NA	55	56	0.7	0.8	0.8	13	57	2	2005	GOVERNMENT	CAT1, CAT2	2	14	0
3	2	57	2007	1	40	AMC	2	5	1	1	1	1	1			Cat IV	2	2	2	1	NEGATIVE						10	SCL HOSPITAL	38	3	13.6254	167		NA	NA	43	46	0.7	0.9	0.7	0	0	2	2006	GOVERNMENT	CAT2 TWICE	1	14	0
3	2	58	2007	1	40	AMC	2	6	1	1	1	1	1			Cat IV	2	2	3	3	NEGATIVE						9	LGH HOSPITAL	40	3	15.0551	163		NA	NA	44	43	0.8	1.1	0.9	13	32	4	2004	GOVERNMENT	CAT2 FOUR TIMES	2	35	0
3	2	59	2007	1	59	AMC	2	5	1	1	1	1	1			Cat IV	2	2	2	1	NEGATIVE						10	NORTH CENTRAL	52	4	17.3745	173		NA	NA	51	54	0.8	0.9	0.6	0	7	3	2004	GOVERNMENT	CAT1, CAT2 TWICE	1	27	0
3	2	60	2007	1	55	AMC	2	5	1	1	1	1	1			Cat IV	4	4	4	4	NEGATIVE						11	EAST ZONE	55	4	19.721	167		NA	NA			0.7			0	0	2	2005	GOVERNMENT	CAT1, CAT2	2	10	0
3	2	1	2008	0	25	AMC	2	5	1	1	1	1	1			Cat IV	1	4	4	4	NEGATIVE						10	LGH HOSPITAL	41	3	17.9817	151		NA	NA			0.8	0.9		5		3	2005	GOVERNMENT	CAT1, CAT2	2	21	0
3	2	2	2008	1	49	AMC	2	6	1	1	1	1	1			Cat IV	1	1	1	6	NEGATIVE						10	SCL HOSPITAL	35	3	13.5026	161		NA	NA	39	34	1	1	9	3	13	3	2006	GOVERNMENT	CAT1, CAT2 TWICE	1	8	0
3	2	3	2008	1	55	AMC	2	5	1	1	1	1	1			Cat IV	2	3	3	3	NEGATIVE						10	AMRAIWADI	32	2	13.8504	152		NA	NA			0.9	0.9		5	0	4	2004	PRIVATE	HRZE, CAT1 CAT2	2	25	0
3	2	4	2008	1	47	AMC	2	5	1	1	1	2	1			Cat IV	2	2	1	4	NEGATIVE						9	SCL HOSPITAL	56	4	17.8748	177		NA	NA	64	66	0.7	0.7	1	40	45	3	2004	PRIVATE	HRZE CAT2 TWICE	1	14	0
3	2	5	2008	0	32	AMC	2	6	1	1	1	1	1			Cat IV	1	1	3	3	NEGATIVE						10	EAST ZONE	27	2	12	150		NA	NA	27	24	0.7	0.8	0.5	30	0	5	2003	GOVERNMENT	CAT1, CAT2 THRICE	1	25	0
3	2	6	2008	1	25	AMC	2	6	1	1	1	1	1			Cat IV	1	1	3	3	NEGATIVE						5	DIU	37	3	13.4272	166		NA	NA	39		0.6	1.6	0.6	0	3	3	2005	GOVERNMENT	CAT2 THRICE	2	24	0
3	2	7	2008	1	29	AMC	2	6	1	1	1	1	1			Cat IV	1	1	3	3	NEGATIVE						10	CENTRAL ZONE	27	2	9.34256	170		NA	NA	30		0.7	0.9	1	30	9	3	2006	GOVERNMENT	CAT1, CAT2 TWICE	1	20	0
3	2	8	2008	0	18	AMC	2	5	1	1	1	2	1			Cat IV	2	2	1	6	NEGATIVE						4	EAST ZONE	36	3	16.6597	147		NA	NA	40	40	0.8	0.8	1	0	3	4	2002	GOVERNMENT	CAT1, CAT2 TWICE	1	20	0
3	2	9	2008	1	26	AMC	2	5	1	1	1	2	1			Cat IV	2	2	3	3	NEGATIVE						10	NORTH CENTRAL	40	3	13.2118	174		NA	NA	40		0.6	0.7	0.7	6	0	3	2006	PRIVATE	HRZE,CAT 2 TWICE	1	17	0
3	2	10	2008	1	30	AMC	2	6	1	1	1	2	1			Cat IV	2	2	2	1	NEGATIVE						9	EAST ZONE	40	3	16.0231	158		NA	NA	44	48	0.8	0.9	0.9	7	0	2	2000	GOVERNMENT	CAT1, CAT2	2	15	0
3	2	11	2008	1	20	AMC	2	7	1	1	1	1	1			Cat IV	1	1	1	4	NEGATIVE						10	NORTH CENTRAL	38	3	13.1488	170		NA	NA	45	46	0.6	0.9	0.9	0	0	2	2006	PRIVATE	HRZE, CAT2	2	13	0
3	2	12	2008	1	41	AMC	2	7	1	1	1	1	1			Cat IV	2	2	2	4	NEGATIVE						10	AMRAIWADI	34	2	14.1519	155		NA	NA	40	41	0.7	0.9	1	0	0	4	2004	PRIVATE	HRZE,CAT2 THRICE	1	26	0
3	2	13	2008	0	35	AMC	2	7	1	1	1	1	1			Cat IV	1	1	3	3	NEGATIVE						10	SOUTH ZONE	30	2	14.2687	145		NA	NA	36	30	0.9	0.9	1	0	0	3	2005	GOVERNMENT	CAT1, CAT2	2	17	0
3	2	14	2008	0	46	AMC	2	7	1	1	1	1	1			Cat IV	2	2	2	6	NEGATIVE						4	EAST ZONE	44	3	19.0443	152		NA	NA	42	48	0.7	1	0.9	0	0	4	2006	GOVERNMENT	CAT1, CAT2	2	9	0
3	2	15	2008	0	39	AMC	2	6	1	1	1	2	2			Cat IV	2	2	2	1	NEGATIVE						10	CENTRAL ZONE	30	2	12.487	155		NA	NA	34	34	0.6	0.7	0.7	0	77	4	1998	GOVERNMENT	HRZE, CAT2 TWICE	1	28	0
3	2	16	2008	1	19	AMC	2	5	1	1	1	2	1			Cat IV	4	4	4	4	NEGATIVE						10	AMRAIWADI	46	4	20.4444	150		NA	Cs stoped			0.6			0	0	4	2004	GOVERNMENT	CAT1, CAT2	2	18	0
3	2	17	2008	1	26	AMC	2	6	1	1	1	1	1			Cat IV	2	2	2	1	NEGATIVE						4	EAST ZONE	60	4	21.5139	167		NA	NA	66	66	0.5	0.6	0.7	13	24	5	2006	PRIVATE	HRZE CAT2 THRICE	1	40	0
3	2	18	2008	0	36	AMC	2	6	1	1	1	2	1			Cat IV	2	2	1	2	NEGATIVE						10	LGH HOSPITAL	43	3	21.3251	142		NA	NA	45	50	0.6	0.6	1.1	13	29	2	2007	GOVERNMENT	CAT1, CAT2	2	10	0
3	2	19	2008	1	30	AMC	2	6	1	1	1	2	1			Cat IV	9	2	2	3	NEGATIVE						4	WEST ZONE	33	2	13.219	158		NA	NA	36	37	0.5	0.8	0.7	1	14	3	1998	PRIVATE	HRZE, CAT2 TWICE	1	14	0
3	2	20	2008	1	38	AMC	2	7	1	1	1	1	1			Cat IV	3	3	3	3	NEGATIVE						11	EAST ZONE	54	4	14.9584	190		NA	KM Stoped			0.7			0	0	5	2000	PRIVATE	HRZE CAT2 THRICE	1	32	0
3	2	21	2008	0	36	AMC	2	6	1	1	1	1	1			Cat IV	1	1	1	3	NEGATIVE						4	AMRAIWADI	35	3	17.8571	140	2009-02-04	Registance in SLD	Ofx&Eto stop	38	36	0.6	0.5	0.7	13	0	3	2003	GOVERNMENT	CAT1, CAT2 TWICE	1	30	0
3	2	22	2008	1	28	AMC	2	6	1	1	1	1	1			Cat IV	2	2	2	4	NEGATIVE						10	CENTRAL ZONE	31	2	11.3866	165		NA	NA	33	33	0.7	0.6	0.7	0	42	2	1998	PRIVATE	HRZE CAT2	2	16	0
3	2	23	2008	1	40	AMC	2	7	1	1	1	1	1			Cat IV	1	1	1	6	NEGATIVE						10	EAST ZONE	46	4	14.8502	176	3/27/2009	ADR	PZ, OF, stop	46	45	0.5	0.7	0.6	0	0	2	2005	PRIVATE	HRZE, CAT2	2	12	0
3	2	24	2008	1	55	AMC	2	7	1	1	1	1	1			Cat IV	2	2	2	1	NEGATIVE						10	CHANDLODIA	38	3	13.6254	167		NA	NA	39	39	0.9	0.6	0.5	4	0	3	2007	GOVERNMENT	CAT1, CAT2 TWICE	1	22	0
3	2	25	2008	0	45	AMC	2	6	1	1	2	2	1			Cat IV	2	2	2	1	NEGATIVE						9	SOUTH ZONE	50	4	21.6413	152	10/18/2008	ADR	KM Stoped	55	56	0.6	0.5	0.7	2	76	2	2007	GOVERNMENT	CAT1, CAT2	2	13	0
3	2	26	2008	0	20	AMC	2	7	1	1	1	1	1			Cat IV	2	2	1	6	NEGATIVE						4	SOUTH ZONE	35	3	14.9515	153		NA	NA	45	45	0.8	0.5	0.7	0	6	4	2003	PRIVATE	HRZETHRICE CAT2	1	24	0
3	2	27	2008	1	22	AMC	2	6	1	1	1	1	1			Cat IV	4	4	4	4	NEGATIVE						10	SOUTH ZONE	48	4	17.6309	165		NA	NA	48		0.7			0	0	3	2006	GOVERNMENT	CAT1, CAT2 TWICE	1	23	0
3	2	28	2008	0	28	AMC	2	7	1	1	1	2	1			Cat IV	2	2	2	1	NEGATIVE						9	AMRAIWADI	30	2	12.487	155		NA	CS Stop	31	33	0.7	0.8	0.6	0	0	2	1993	GOVERNMENT	HRZES, CAT2	2	16	0
3	2	29	2008	1	24	AMC	2	6	1	1	1	1	1			Cat IV	1	1	1	6	NEGATIVE						10	CENTRAL ZONE	47	4	15.5238	174		NA	NA	51	52	1	0.7	0.6	0	0	5	2003	GOVERNMENT	CAT1, CAT2 FOUR TIMES	1	28	0
3	2	30	2008	1	21	AMC	2	6	1	1	1	1	1			Cat IV	2	2	2	1	NEGATIVE						10	AMRAIWADI	45	4	14.6939	175		NA	NA	50	52	0.8	0.9	0.6	4	0	2	2007	GOVERNMENT	CAT1, CAT2	2	14	0
3	2	31	2008	1	42	AMC	2	7	1	1	1	1	1			Cat IV	2	1	1	6	NEGATIVE						10	SCL HOSPITAL	50	4	18.8189	163		NA	CS stop	54	57	0.6	0.7	0.6	0	15	4	2000	PRIVATE	HRZE THRICE, CAT2	1	25	0
3	2	32	2008	1	28	AMC	2	6	1	1	1	1	1			Cat IV	2	2	2	2	NEGATIVE						10	SOUTH ZONE	46	4	17.9688	160		NA	NA	50	50	0.7	0.5	0.7	1	27	4	2005	PRIVATE	HRZE, CAT2 THRICE	1	31	0
3	2	33	2008	0	18	AMC	2	7	1	1	1	1	1			Cat IV	2	2	1	6	NEGATIVE						4	AMRAIWADI	26	2	12.3662	145		NA	NA	33	33	0.6	0.4	0.7	0	9	2	2007	PRIVATE	HRZE CAT2	2	12	0
3	2	34	2008	0	28	AMC	2	6	1	1	1	1	1			Cat IV	1	2	2	3	NEGATIVE						4	CHANDLODIA	31	2	13.4176	152	5/25/2009	Registance in SLD	Of Stopped	36	36	0.6	0.7	0.6	0	7	2	2005	PRIVATE	HRZE,CAT 2	2	44	0
3	2	35	2008	0	26	AMC	2	6	1	1	1	1	1			Cat IV	2	2	2	3	NEGATIVE						9	CENTRAL ZONE	40	3	19.025	145	2009-05-02	Registance in SLD	Eth Stopped	40	40	0.7	0.7	0.5	0	0	4	1997	GOVERNMENT	HRZE,CAT2 THRICE	1	27	0
3	2	36	2008	0	30	AMC	2	7	1	1	1	1	1			Cat IV	3	3	3	3	NEGATIVE						10	LGH HOSPITAL	30	2	12.8156	153		NA	NA			0.2			50	0	4	1998	GOVERNMENT	CAT2,THRICE	1	34	0
3	2	37	2008	0	25	AMC	2	7	1	1	1	1	1			Cat IV	2	6	6	5	NEGATIVE						9	SOUTH ZONE	43	3	15.9875	164		NA	All Drug Stopped	43		0.8	0.5		36	0	5	2004	GOVERNMENT	CAT3,CAT2 THRICE	1	39	0
3	2	38	2008	1	30	AMC	2	7	1	1	1	1	1			Cat IV	1	2	2	1	NEGATIVE						5	SOUTH ZONE	30	2	11.4312	162		NA	NA	34	34	0.7	0.8	0.7	1	0	3	1998	GOVERNMENT	HRZES, CAT2	2	14	0
3	2	39	2008	1	40	AMC	2	5	1	1	1	1	1			Cat IV	2	3	3	3	NEGATIVE						10	CENTRAL ZONE	30	2	11.0193	165		NA	KM, Etho stopped	34		0.5	0.7	0.7	0	6	3	2001	GOVERNMENT	CAT3, CAT2 TWICE	1	23	0
3	2	40	2008	1	50	AMC	2	5	1	1	1	1	1			Cat IV	1	2	1	3	NEGATIVE						10	SOUTH ZONE	53	4	19.4674	165		NA	NA	60	56	0.7	0.7	0.6	0	36	4	1992	GOVERNMENT	HRZE-TWICE,CAT2	1	20	0
3	2	41	2008	1	41	AMC	2	5	1	1	1	1	1			Cat IV	2	2	2	1	NEGATIVE						10	SCL HOSPITAL	62	4	21.4533	170	10/28/2008	ADR	KM Stoped	69	70	0.8	0.9	1.1	8	3	4	2000	PRIVATE	HRZE, CAT2 THRICE	1	25	0
3	2	42	2008	1	28	AMC	2	6	1	1	1	1	1			Cat IV	2	1	4	4	NEGATIVE						10	SCL HOSPITAL	30	2	11.0193	165		NA	NA	35	35	0.4	0.7	0.5	6	33	3	2006	GOVERNMENT	CAT1, CAT2 TWICE	1	12	0
3	2	43	2008	1	28	AMC	2	7	1	1	1	1	1			Cat IV	4	4	4	4	NEGATIVE						9	EAST ZONE	39	3	13.4948	170		NA	NA			0.4			7	0	2	2005	PRIVATE	HRZE, CAT2	2	10	0
3	2	44	2008	1	35	AMC	2	7	1	1	1	2	2			Cat IV	2	2	2	2	NEGATIVE						9	WEST ZONE	36	3	13.8884	161		NA	NA	40	39	0.6	0.5	0.7	7	3	3	2006	PRIVATE	HRZE, CAT2 TWICE	1	21	0
3	2	45	2008	1	43	AMC	2	5	1	1	1	1	2			Cat IV	2	2	2	1	NEGATIVE						9	LGH HOSPITAL	34	2	12.3385	166		NA	NA	38	42	0.8	0.5	0.7	2	56	2	2006	GOVERNMENT	CAT2 TWICE	1	12	0
3	2	46	2008	1	29	AMC	2	6	1	1	1	1	1			Cat IV	2	2	2	1	NEGATIVE						10	AMRAIWADI	47	4	18.8271	158		NA	NA	54	53	0.9	0.7	0.6	0	0	3	2005	PRIVATE	HRZE,CAT2 TWICE	1	10	0
3	2	47	2008	1	26	AMC	2	7	1	1	1	1	1			Cat IV	1	4	4	4	NEGATIVE						10	WEST ZONE	39	3	15.8221	157		NA	NA	45		0.6	0.5		12	0	3	2003	PRIVATE	HRZE CAT2	2	14	0
3	2	48	2008	1	53	AMC	2	6	1	1	1	1	1			Cat IV	2	2	2	1	NEGATIVE						9	SOUTH ZONE	51	4	19.433	162		NA	NA	56		0.9	0.8	0.5	0	9	4	2006	GOVERNMENT	CAT1, CAT2 TWICE	1	24	0
3	2	49	2008	1	62	AMC	2	5	1	1	1	1	1			Cat IV	1	1	1	6	NEGATIVE						9	SOUTH ZONE	61	4	21.6128	168		NA	NA	55	58	0.5	0.7	0.8	9	5	3	2002	GOVERNMENT	CAT1, CAT2 TWICE	1	18	0
3	2	50	2008	0	15	AMC	2	6	1	1	1	1	1			Cat IV	2	2	2	1	NEGATIVE						4	EAST ZONE	22	1	9.77778	150		NA	NA	26	27	0.8	0.9	0.8	0	0	4	2004	GOVERNMENT	CAT1, CAT2 THRICE	1	20	0
3	2	51	2008	0	18	AMC	2	7	1	1	1	2	1			Cat IV	2	2	2	1	NEGATIVE						10	SOUTH ZONE	33	2	13.0533	159		NA	NA	36	38	0.6	0.8	0.5	0	7	2	2007	PRIVATE	HRZE, CAT2	2	8	0
3	2	52	2008	1	35	AMC	2	7	1	1	1	2	1			Cat IV	3	3	3	3	NEGATIVE						10	AMRAIWADI	39	3	13.3374	171		NA	NA	39		0.6	0.5		0	0	3	2004	PRIVATE	CAT2 TWICE	1	29	0
3	2	53	2008	1	22	AMC	2	7	1	1	1	1	1			Cat IV	1	1	1	4	NEGATIVE						10	SCL HOSPITAL	33	2	11.4187	170		NA	NA	42	35	0.7	0.9	0.5	16	104	2	2006	PRIVATE	HRZE, CAT2	2	14	0
3	2	54	2008	1	17	AMC	2	6	1	1	1	1	1			Cat IV	2	2	2	1	NEGATIVE						10	SOUTH ZONE	50	4	17.301	170		NA	NA	56		0.6	0.5	0.3	0	15	3	2007	GOVERNMENT	CAT1, CAT2 TWICE	1	21	0
3	2	55	2008	0	20	AMC	2	7	1	1	1	2	1			Cat IV	1	1	1	6	NEGATIVE						4	SOUTH ZONE	33	2	15.0657	148	5/22/2009	Registance in SLD	CS stopped	36	37	0.7	0.4	0.6	23	1	2	2006	GOVERNMENT	CAT1, CAT2	2	18	0
3	2	56	2008	1	55	AMC	2	6	1	1	1	1	1			Cat IV	2	2	2	1	NEGATIVE						10	CENTRAL ZONE	54	4	19.3625	167		NA	NA						0	0	3	1998	GOVERNMENT	HRZES, CAT2 TWICE	1	20	0
3	2	57	2008	0	42	AMC	2	7	1	1	1	2	1			Cat IV	2	2	2	1	NEGATIVE						10	AMRAIWADI	44	3	22.449	140		NA	NA	45	47	0.7	0.8	0.5	0	0	4	1998	GOVERNMENT	HRZES, CAT2 THRICE	1	36	0
3	2	58	2008	0	25	AMC	2	6	1	1	1	2	2			Cat IV	1	2	2	1	NEGATIVE						10	CENTRAL ZONE	44	3	18.5529	154		NA	NA	44		0.6	0.7		0	0	3	2002	PRIVATE	HRZE,CAT2 TWICE	1	48	0
3	2	59	2008	1	35	AMC	2	6	1	1	1	2	2			Cat IV	2	2	2	4	NEGATIVE						10	LGH HOSPITAL	48	4	15.6735	175		NA	CS stopped	49		0.5	0.8	1.2	8	22	2	2007	GOVERNMENT	CAT1, CAT2	2	14	0
3	2	60	2008	1	17	AMC	2	5	1	1	1	1	1			Cat IV	2	2	2	1	NEGATIVE						10	SOUTH ZONE	36	3	12.7551	168		NA	NA	45		0.8	0.6	0.5	0	0	3	2006	GOVERNMENT	CAT1, CAT2 TWICE	1	18	0
3	2	61	2008	0	24	AMC	2	7	1	1	1	1	1			Cat IV	1	2	2	1	NEGATIVE						10	SOUTH ZONE	27	2	9.56633	168		NA	NA	30		0.6	0.3	0.8	0	0	3	2003	PRIVATE	HRZES,,CAT2	2	22	0
3	2	62	2008	0	30	AMC	2	6	1	1	1	1	1			Cat IV	1	1	3	3	NEGATIVE						4	WEST ZONE	33	2	13.219	158		NA	NA	34		0.6	0.7	0.5	62	0	2	2007	GOVERNMENT	CAT1, CAT2	2	10	0
3	2	63	2008	0	45	AMC	2	7	1	1	1	1	1			Cat IV	2	2	2	6	NEGATIVE						10	AMRAIWADI	32	2	12.5	160		NA	NA	37		0.6	0.7	0.5	0	32	3	1993	PRIVATE	HRZE, CAT2 TWICE	1	9	0
3	2	64	2008	1	52	AMC	2	5	1	1	1	1	1			Cat IV	2	2	2	2	NEGATIVE						4	NORTH CENTRAL	58	4	21.3039	165		NA	NA	58		0.6	0.6	0.5	16	0	2	2007	GOVERNMENT	CAT1, CAT2	2	12	0
3	2	65	2008	0	27	AMC	2	7	1	1	1	1	1			Cat IV	1	1	1	6	NEGATIVE						10	SOUTH ZONE	42	3	17.4818	155		NA	NA	42		0.6	0.8	0.5	0	5	3	2006	PRIVATE	HRZE CAT2	2	8	1
3	2	66	2008	1	52	AMC	2	6	1	1	1	1	1			Cat IV	2	2	2	6	NEGATIVE						10	CENTRAL ZONE	44	3	16.3593	164		NA	NA	44		0.6	0.5	0.8	0	68	3	2000	PRIVATE	HRZE CAT2 TWICE	1	14	0
3	2	67	2008	1	46	AMC	2	5	1	1	1	1	1			Cat IV	1	4	4	4	NEGATIVE						4	SOUTH ZONE	49	4	18.2183	164		NA	NA			0.7			200	0	4	1998	PRIVATE	HRZE, CAT2 TWICE	1	30	0
3	2	68	2008	0	28	AMC	2	6	1	1	1	1	1			Cat IV	2	1	2	1	NEGATIVE						10	SCL HOSPITAL	50	4	20.0288	158	2009-05-01	ADR	Etio stopped	55		0.7	1.1	0.6	0	0	2	2004	GOVERNMENT	CAT2 TWICE	1	8	0
3	2	69	2008	0	23	AMC	2	5	1	1	1	1	1			Cat IV	2	2	2	4	NEGATIVE						10	AMRAIWADI	36	3	17.8536	142		NA	NA	38		0.6	0.8	0.6	1	17	3	2000	GOVERNMENT	CAT1, CAT2 TWICE	1	24	0
3	2	70	2008	0	50	AMC	2	7	1	1	1	1	1			Cat IV	2	2	2	2	NEGATIVE						10	CHANDLODIA	54	4	22.4766	155		NA	NA	65		0.6	0.8	0.5	0	0	4	2006	PRIVATE	HRZETHRICE CAT2	1	12	0
3	2	71	2008	0	36	GNR	2	6	1	1	1	1	1			Cat IV	1	1	2	1	NEGATIVE						10	Gandhinagar	29	2	13.4203	147		NA	NA			0.3	0.7		0	0	3	2006	GOVERNMENT	CAT1, CAT2 TWICE	1	22	0
3	2	1	2009	0	27	AMC	2	7	1	1	1	1	1			Cat IV	1	2	2	1	NEGATIVE						10	NORTH CENTRAL	39	3	16.8802	152		NA	NA	40	41	0.7	0.4	0.6	0	0	3	2003	GOVERNMENT	CAT1, HRZE, CAT2	2	10	0
3	2	2	2009	0	25	AMC	2	7	1	1	1	1	1			Cat IV	2	2	2	1	NEGATIVE						10	CENTRAL ZONE	34	2	15.9505	146		NA	NA	35	37	0.8	0.5	0.6	0	0	2	2007	PRIVATE	HRZE,CAT 2	2	10	0
3	2	3	2009	0	20	AMC	2	7	1	1	1	1	1			Cat IV	2	1	2	6	NEGATIVE						4	EAST ZONE	38	3	15.8169	155		NA	NA	40	36	0.9	0.9		7	22	3	2007	GOVERNMENT	CAT1, CAT2 TWICE	1	22	0
3	2	4	2009	1	34	AMC	2	7	1	1	1	1	1			Cat IV	1	4	4	4	NEGATIVE						10	CENTRAL ZONE	34	2	11.7647	170		NA	NA	35		0.6	0.8		65	0	3	2007	GOVERNMENT	CAT1, CAT2 TWICE	1	22	0
3	2	5	2009	0	18	AMC	2	5	1	1	1	1	1			Cat IV	2	2	2	4	NEGATIVE						10	SOUTH ZONE	37	3	14.4531	160		NA	NA	35	30	0.6	0.9		0	0	3	2006	PRIVATE	HRZE TWICE,CAT 2	1	12	0
3	2	6	2009	0	48	AMC	2	5	1	1	1	1	1			Cat IV	4	4	4	4	NEGATIVE						4	EAST ZONE	50	4	20.0288	158		NA	NA			0.7			0	0	2	2008	PRIVATE	HRZE,CAT 2	2	12	0
3	2	7	2009	0	27	AMC	2	7	1	1	1	1	1			Cat IV	2	2	2	1	NEGATIVE						9	SOUTH ZONE	43	3	16.3847	162		NA	NA	56	47	0.8	0.7	0.8	0	122	3	2002	GOVERNMENT	CAT1, CAT2	2	27	0
3	2	8	2009	0	23	AMC	2	7	1	1	1	1	1			Cat IV	2	1	1	3	NEGATIVE						10	MEMNAGAR	32	2	14.6092	148		NA	NA	34	36	0.7		0.4	0	0	3	2006	PRIVATE	HRZE TWICE,CAT 2	1	19	0
3	2	9	2009	1	45	AMC	2	7	1	1	1	2	2			Cat IV	2	2	2	1	NEGATIVE						9	EAST ZONE	64	4	23.7954	164		NA	NA	64	64	0.8	0.9	0.5	55	117	3	2007	GOVERNMENT	CAT1, CAT2	2	20	1
3	2	10	2009	1	19	AMC	2	7	1	1	1	1	1			Cat IV	1	2	1	2	NEGATIVE						10	SCL HOSPITAL	32	2	11.6127	166		NA	NA	39	39	0.8	0.7		0	20	2	2007	PRIVATE	PVT,CAT 2	2	16	0
3	2	11	2009	0	29	AMC	2	6	1	1	1	1	1			Cat IV	2	2	2	2	NEGATIVE						9	SOUTH ZONE	32	2	14.6092	148		NA	NA	35	34	0.6		0.7	0	6	2	2007	GOVERNMENT	CAT1, CAT2	2	9	0
3	2	12	2009	0	20	AMC	2	6	1	1	1	2	2			Cat IV	2	2	2	4	NEGATIVE						9	SCL HOSPITAL	45	4	18.9745	154		NA	CS stopped	44	50	0.7	0.5		2	105	2	2008	GOVERNMENT	CAT1, CAT2	2	9	0
3	2	13	2009	1	30	AMC	2	5	1	1	1	2	1			Cat IV	2	2	2	1	NEGATIVE						10	EAST ZONE	44	3	19.5556	150		NA	NA	44	44	0.7	0.8	0.4	7	3	4	2005	GOVERNMENT	CAT1, CAT2 THRICE	1	27	0
3	2	14	2009	0	20	SRN	2	5	1	1	1	1	1			Cat IV	1	1	1	3	NEGATIVE						4	HALVAD	39	3	16.6603	153		NA	NA	42		0.8	1.2	0.9	0	0	2	2007	PRIVATE	HRZES,CAT 2	2	13	0
3	2	15	2009	1	49	AMC	2	5	1	1	1	1	1			Cat IV	2	2	2	1	NEGATIVE						10	CENTRAL ZONE	57	4	18.6122	175		NA	Etio,PZ stopped	58	60	0.6		0.6	0	0	3	2006	PRIVATE	HRZE TWICE,CAT 2	1	20	1
3	2	16	2009	1	30	SBK	2	5	1	1	1	2	1			Cat IV	2	2	1	6	NEGATIVE						1	IDAR	35	3	12.8558	165		NA	NA	36	43	0.5	0.5	0.6	0	0	2	2007	GOVERNMENT	CAT1, CAT2	2	7	0
3	2	17	2009	1	22	AMC	2	6	1	1	1	1	1			Cat IV	1	2	2	1	NEGATIVE						10	CHANDLODIA	35	3	10.5664	182		NA	NA	45	50	0.5	0.5		0	0	2	2008	PRIVATE	HRZE,CAT 2,	2	10	0
3	2	18	2009	1	30	AMC	2	7	1	1	1	1	1			Cat IV	1	1	1	3	NEGATIVE						10	MEMNAGAR	34	2	12.4885	165	2009-03-06	ADR	KM,CS Stoped	35	34	0.7			7	0	3	2005	GOVERNMENT	CAT2 TWICE	1	11	0
3	2	19	2009	1	40	AMC	2	6	1	1	1	2	1			Cat IV	1	2	2	1	NEGATIVE						10	CENTRAL ZONE	59	4	20.4152	170		NA	CS stopped	59	60	0.6	0.5	0.7	0	1	4	1990	PRIVATE	HRZE,CAT 2 THRICE	1	39	0
3	2	20	2009	1	40	SBK	2	6	1	1	1	1	1			Cat IV	2	2	2	1	NEGATIVE						7	IDAR	43	3	16.3847	162		NA	NA	43	43	0.6	0.6		10	41	3	2007	PRIVATE	HRZE,CAT 2 TWICE	1	19	0
3	2	21	2009	1	60	SBK	2	7	1	1	1	1	1			Cat IV	2	2	3	3	NEGATIVE						9	MODSA	42	3	15.427	165		NA	NA	42		0.7	0.8	0.8	0	0	3	2006	PRIVATE	HRZE,CAT 2 TWICE	1	13	1
3	2	22	2009	0	30	AMC	1	5	1	1	1	1	1			Cat IV	1	1	1	6	NEGATIVE						10	CENTRAL ZONE	29	2	14.1816	143		NA	NA	30	32	0.8	0.8	0.7	0	0	2	2004	PRIVATE	HRZE,CAT 2	2	12	0
3	2	23	2009	1	23	GNR	2	6	1	1	1	1	1			Cat IV	1	2	1	6	POSITIVE						10	MANSA	34	2	12.7969	163		NA	CS stopped	44	43	0.8	0.7		64	66	3	2006	GOVERNMENT	CAT1, CAT2 TWICE	1	23	0
3	2	25	2009	1	30	SBK	2	4	1	1	1	1	1			Cat IV	2	2	2	3	NEGATIVE						1	BHILODA	31	2	12.7383	156		NA	NA	31	34	0.8	0.8	0.9	1	0	3	2003	GOVERNMENT	CAT1, CAT2 TWICE	1	22	0
3	2	26	2009	1	35	AMC	2	7	1	1	1	1	1			Cat IV	1	1	2	2	NEGATIVE						10	SOUTH ZONE	45	4	14.5274	176	7/25/2009	ADR	Pz,CS stopped	48	48	0.4		0.4	7	0	3	2000	PRIVATE	HRZE,CAT 2 TWICE	1	17	0
3	2	27	2009	1	28	KDA	2	6	1	1	1	1	2			Cat IV	2	2	2	1	NEGATIVE						4	KATHLAL	45	4	17.1468	162		NA	Eth	44	45	0.6			76	32	3	2002	GOVERNMENT	CAT1, CAT2 TWICE	1	22	0
3	2	28	2009	1	23	SRN	2	7	1	1	1	1	1			Cat IV	3	3	3	3	NEGATIVE						5	CHOTILA	33	2	12.5743	162		NA	CS stopped			0.6	0.9		90	0	3	2003	GOVERNMENT	CAT2 THRICE	2	16	0
3	2	29	2009	1	28	SBK	2	6	1	1	1	1	1			Cat IV	2	2	2	1	NEGATIVE						1	MEGHARAJ	36	3	13.3849	164		NA	NA	38	37	0.6	0.8	0.8	5	0	3	2008	PRIVATE	HRZE,CAT 2 TWICE	1	13	0
3	2	30	2009	1	39	AMC	2	4	1	1	1	1	1			Cat IV	2	2	2	1	NEGATIVE						10	CENTRAL ZONE	52	4	17.7832	171		NA	NA	52	55	0.8	0.5		0	0	4	2006	PRIVATE	HRZE,CAT 2 THRICE	1	27	0
3	2	31	2009	1	28	AMC	2	6	1	1	1	1	1			Cat IV	1	1	1	3	NEGATIVE						10	EAST ZONE	48	4	15.1496	178		NA	PZ stopped	48	45	0.4	0.7		14	2	3	2004	PRIVATE	HRZE,CAT 2 TWICE	1	13	0
3	2	32	2009	1	35	MSN	2	5	1	1	1	1	1			Cat IV	2	2	1	4	NEGATIVE						10	MEHSANA	43	3	14.2027	174		NA	NA	44		0.7			50	0	3	2006	GOVERNMENT	CAT1, CAT2 TWICE	1	16	0
3	2	33	2009	1	40	AMC	2	7	1	1	1	2	2			Cat IV	2	2	4	4	NEGATIVE						10	MEMNAGAR	50	4	16.5147	174		NA	NA	52	52	0.4	0.5		50	0	3	1983	PRIVATE	HRZES TWICE,CAT 2	1	14	1
3	2	34	2009	1	36	AMC	2	5	1	1	1	2	2			Cat IV	2	2	2	1	NEGATIVE						10	SCL HOSPITAL	45	4	18.026	158		NA	NA	41	46	0.6	0.9		3	33	2	2005	GOVERNMENT	CAT3, CAT2	2	10	0
3	2	35	2009	1	38	AMC	2	5	1	1	1	1	1			Cat IV	2	1	2	6	NEGATIVE						10	CHANDLODIA	42	3	15.8079	163		NA	NA	44	43	0.7		0.7	0	0	3	2006	PRIVATE	HRZE,CAT2,CAT2	2	18	0
3	2	36	2009	1	20	AMC	2	5	1	1	1	1	1			Cat IV	4	4	4	4	NEGATIVE						10	SOUTH ZONE	44	3	18.0802	156		NA	NA			0.6			26	0	2	2005	GOVERNMENT	CAT1, CAT2	2	10	0
3	2	37	2009	1	44	KDA	2	7	1	1	1	1	1			Cat IV	3	3	3	3	NEGATIVE						5	HALDARVAS	43	3	14.7054	171		NA	NA			0.6			11	0	7	1999	GOVERNMENT	HRZE,CAT 2 FOUR TIMES	1	59	0
3	2	38	2009	1	40	AMC	2	5	1	1	1	1	1			Cat IV	3	3	3	3	NEGATIVE						10	EAST ZONE	43	3	13.7253	177		NA	NA			0.7			40	0	2	2004	GOVERNMENT	CAT1, CAT2	2	10	0
3	2	39	2009	1	20	KDA	2	6	1	1	1	1	1			Cat IV	1	1	3	3	NEGATIVE						4	DTC NADIAD	43	3	14.8789	170	9/17/2009	ADR	KM Stoped	45	46	0.6	0.9	0.9	42	7	4	2006	GOVERNMENT	CAT1, CAT2 THRICE	1	23	0
3	2	40	2009	1	36	AMC	2	5	1	1	1	1	1			Cat IV	4	4	4	4	NEGATIVE						10	NORTH CENTRAL	35	3	10.8025	180		NA	NA			0.8			0	0	3	2005	PRIVATE	HRZE,CAT 2 TWICE	1	15	0
3	2	41	2009	1	22	AMC	2	7	1	1	1	1	1			Cat IV	2	2	2	1	NEGATIVE						10	EAST ZONE	38	3	15.2219	158	8/22/2009	ADR	PZ&Etio stopped	39	40	0.4	0.5	0.7	0	0	2	2007	GOVERNMENT	CAT1, CAT2	2	6	0
3	2	42	2009	0	50	AMC	2	6	1	1	1	1	1			Cat IV	2	2	2	1	NEGATIVE						10	SEWA	49	4	19.1406	160		NA	NA	48	51	0.6	0.8		25	5	2	2008	GOVERNMENT	CAT1, CAT2	2	12	0
3	2	43	2009	1	23	AMC	2	7	1	1	1	1	1			Cat IV	4	4	4	4	NEGATIVE						10	NORTH CENTRAL	43	3	16.3847	162		NA	NA			0.6			7	0	2	2007	PRIVATE	HRZE,CAT 2	2	6	0
3	2	44	2009	1	28	AMC	2	7	1	1	1	2	1			Cat IV	1	2	4	4	NEGATIVE						10	MEMNAGAR	45	4	16.7311	164		NA	NA	50		0.8			25	0	4	1997	GOVERNMENT	HRZES,CAT 2 THRICE	1	27	0
3	2	45	2009	1	48	AMC	1	6	1	1	1	1	1			Cat IV	2	2	3	3	NEGATIVE						10	SCL HOSPITAL	39	3	15.2344	160		NA	NA	40		0.7	1	0.7	0	0	2	2008	GOVERNMENT	CAT1, CAT2	2	7	1
3	2	46	2009	0	27	AND	2	6	1	1	1	1	1			Cat IV	2	2	2	1	NEGATIVE						4	ANKLAV	35	3	15.3502	151		NA	NA	33	36	0.6			0	0	2	2007	GOVERNMENT	CAT2 TWICE	1	15	0
3	2	47	2009	0	35	AND	2	5	1	1	1	1	1			Cat IV	2	2	2	1	NEGATIVE						5	ANKLAV	30	2	13.5129	149		NA	NA	39	40	0.6			0	5	2	2006	GOVERNMENT	CAT1, CAT2	2	16	0
3	2	48	2009	1	28	AMC	2	6	1	1	1	2	1			Cat IV	1	3	3	3	NEGATIVE						10	SOUTH ZONE	40	3	14.8721	164		NA	NA	40		1			0	0	2	2008	GOVERNMENT	CAT1, CAT2	2	9	0
3	2	49	2009	0	36	GNR	2	5	1	1	1	2	1			Cat IV	2	2	2	1	NEGATIVE						1	MANSA	44	3	17.1875	160		NA	NA	45		0.8	0.9	0.9	5	3	2	2008	GOVERNMENT	CAT1, CAT2	2	9	0
3	2	50	2009	1	78	SBK	2	6	1	1	1	1	2			Cat IV	2	2	3	3	NEGATIVE						1	DTC HIMMATNAGAR	44	3	15.0474	171	9/21/2009	ADR	KM Stoped	44	44	0.9	0.8	0.9	29	0	2	2008	GOVERNMENT	CAT3, CAT2	2	11	0
3	2	51	2009	1	21	AMC	2	7	1	1	1	1	1			Cat IV	2	2	2	1	NEGATIVE						10	EAST ZONE	53	4	16.5413	179		NA	NA	53	54	0.7	0.6	0.5	0	0	2	2004	PRIVATE	HRZE,CAT 2	2	17	0
3	2	52	2009	1	44	AMC	2	7	1	1	1	1	1			Cat IV	2	2	2	6	NEGATIVE						10	CENTRAL ZONE	33	2	12.5743	162	2009-05-11	ADR	Ethio	35	35	0.8			0	0	5	2000	PRIVATE	HRZE,CAT 2 ,4 TIMES	1	35	0
3	2	53	2009	1	30	AMC	2	7	1	1	1	1	1			Cat IV	2	1	1	3	NEGATIVE						10	NORTH CENTRAL	40	3	16.4366	156		NA	NA	41	43	0.5			0	0	2	2004	GOVERNMENT	CAT1, CAT2	2	10	0
3	2	54	2009	0	40	AMC	2	7	1	1	1	1	1			Cat IV	1	2	3	3	NEGATIVE						10	SEWA	45	4	20	150	2009-10-12	ADR	KM STOPPED	45	45	0.7			0	0	3	2003	PRIVATE	HRZE TWICE,CAT 2	1	17	0
3	2	55	2009	0	21	AMC	2	5	1	1	1	1	1			Cat IV	2	2	2	1	NEGATIVE						10	NORTH CENTRAL	50	4	21.0828	154		NA	NA	58	52	0.7			0	0	4	2003	PRIVATE	HRZE TWICE,CAT 2TWICE	1	18	0
3	2	56	2009	1	21	AMC	2	7	1	1	1	2	1			Cat IV	2	2	2	1	NEGATIVE						10	NORTH CENTRAL	55	4	19.0311	170		NA	NA	56	57	0.7			0	0	2	2008	PRIVATE	HRZE,CAT 2	2	7	0
3	2	57	2009	1	40	SBK	2	6	1	1	1	1	1			Cat IV	2	2	1	3	NEGATIVE						1	DHANSURA	36	3	12.6046	169		NA	NA	35	35	0.5		0.6	32	0	5	2004	GOVERNMENT	CAT1, CAT2 FOUR TIMES	1	35	0
3	2	58	2009	1	44	AMC	2	6	1	1	1	1	2			Cat IV	2	2	2	1	NEGATIVE						10	WEST ZONE	45	4	18.7305	155		NA	NA	45	46	0.6	0.7		12	14	2	2008	GOVERNMENT	CAT1, CAT2	2	14	0
3	2	59	2009	0	53	AMC	2	6	1	1	1	1	1			Cat IV	2	2	2	1	NEGATIVE						10	SCL HOSPITAL	48	4	20.7756	152		NA	NA	48	48	0.7	0.7	0.9	2	7	2	2008	GOVERNMENT	CAT1, CAT2	2	8	0
3	2	60	2009	1	25	AMC	2	7	1	1	1	2	2			Cat IV	2	2	2	2	NEGATIVE						10	CHANDLODIA	43	3	14.3673	173		NA	CS stopped	44	45	0.8			15	10	2	2005	GOVERNMENT	CAT1, CAT2	2	13	0
3	2	61	2009	1	21	AMC	2	6	1	1	1	1	1			Cat IV	2	2	2	6	NEGATIVE						10	SOUTH ZONE	44	3	17.1875	160		NA	NA	45		0.6			62	102	3	2007	GOVERNMENT	CAT1, CAT2 TWICE	1	22	0
3	2	62	2009	0	51	AMC	2	7	1	1	1	1	1			Cat IV	2	2	2	2	NEGATIVE						10	AMRAIWADI	39	3	17.3333	150	2010-08-04	ADR	Ethi stopped	35	36	0.6			0	0	2	2000	GOVERNMENT	CAT1, CAT2	2	11	0
3	2	63	2009	1	55	AMC	1	6	1	1	1	2	2			Cat IV	2	1	4	4	NEGATIVE						10	AMRAIWADI	35	3	14.9515	153		NA	NA	42	44	0.7			24	0	2	2008	GOVERNMENT	CAT1, CAT2	2	14	0
3	2	64	2009	1	20	AMC	2	6	1	1	1	1	1			Cat IV	2	2	2	1	NEGATIVE						10	SOUTH ZONE	23	1	9.95499	152		NA	NA	25		0.4			0	9	2	2008	GOVERNMENT	CAT1, CAT2	2	10	0
3	2	65	2009	1	50	AMC	2	6	1	1	1	1	1			Cat IV	1	2	1	6	NEGATIVE						10	SCL HOSPITAL	60	4	22.5827	163		NA	NA	57		0.7	0.9		0	0	3	2008	PRIVATE	HRZES TWICE,CAT 1	1	9	1
3	2	66	2009	0	25	SRN	2	6	1	1	1	1	2			Cat IV	2	2	2	2	NEGATIVE						3	SURENDRANAGR	35	3	15.3502	151		NA	NA	40		0.5	1.2		2	0	4	2005	PRIVATE	HRZE,CAT 2 TWICE	1	14	0
3	2	67	2009	0	15	GNR	1	6	1	1	1	2	2			Cat IV	2	2	2	1	NEGATIVE						4	MANSA	25	2	11.1111	150		NA	NA	27		0.7	0.4	0.4	0	0	2	2008	GOVERNMENT	CAT1, CAT2	2	14	0
3	2	68	2009	0	23	AND	3	6	1	1	1	1	1			Cat IV	2	2	3	3	NEGATIVE						10	KHAMBHAT	33	2	12.8906	160		NA	NA	34		0.8			0	0	2	2008	GOVERNMENT	CAT3, CAT2	2	11	0
3	2	69	2009	0	30	AMC	2	5	1	1	1	1	1			Cat IV	1	2	1	1	NEGATIVE						10	SEWA	25	2	10.6797	153		NA	PZ stopped	25	27	0.8			0	4	3	2007	GOVERNMENT	CAT1, CAT2 TWICE	1	20	0
3	2	70	2009	0	59	MSN	2	6	1	1	1	1	1			Cat IV	2	1	2	1	NEGATIVE						1	VISNAGAR	45	4	20.5442	148		NA	NA	48		0.9		0.9	0	0	2	2007	GOVERNMENT	CAT1, CAT2	2	12	0
3	2	71	2009	1	61	AMC	2	6	1	1	1	1	1			Cat IV	2	2	1	3	NEGATIVE						10	SCL HOSPITAL	44	3	17.4044	159	12/23/2009	ADR OFKANA	KM STOPPED			0.7	0.8		0	0	2	2008	GOVERNMENT	CAT1, CAT2	2	10	0
3	2	72	2009	1	25	SBK	2	6	1	1	1	1	1			Cat IV	2	2	1	4	NEGATIVE						9	DHANSURA	44	3	15.5896	168		NA	NA	43		0.6	1.3		0	0	2	2008	GOVERNMENT	CAT1, CAT2	2	6	0
3	2	73	2009	1	50	BAN	2	5	1	1	1	2	1			Cat IV	1	4	4	4	NEGATIVE						4	DANTA	39	3	15.2344	160		NA	NA	39		0.3					3	2008	GOVERNMENT	CAT1, CAT2 TWICE	1	21	0
3	2	74	2009	0	18	AMC	2	6	1	1	1	1	1			Cat IV	2	2	3	3	NEGATIVE						9	WEST ZONE	34	2	12.9553	162		NA	NA	34		0.8			5	0	3	2008	PRIVATE	HRZES,CAT2 TWICE	1	23	0
3	2	75	2009	1	25	AMC	2	6	1	1	1	1	1			Cat IV	1	4	4	4	NEGATIVE						10	NORTH CENTRAL	40	3	15.8222	159		NA	NA	41		0.8			70	0	2	2008	GOVERNMENT	CAT1, CAT2	2	11	0
3	2	76	2009	1	32	AMC	2	6	1	1	1	1	1			Cat IV	1	1	1	6	NEGATIVE						10	SOUTH ZONE	49	4	19.1406	160		NA	NA	50		0.7			50	75	2	2006	GOVERNMENT	CAT1, CAT2	2	15	0
3	2	77	2009	1	22	AMC	2	7	1	1	1	1	1			Cat IV	3	3	3	3	NEGATIVE						10	SOUTH ZONE	30	2	12.9848	152		NA	CS ,ETIO STOPPED			0.7			0	0	4	2005	GOVERNMENT	CAT1, CAT2 TWICE	1	26	0
3	2	78	2009	0	18	AMC	2	5	1	1	1	2	1			Cat IV	2	2	2	1	NEGATIVE						10	SCL HOSPITAL	24	1	10.9569	148		NA	NA	25		0.5			0	0	2	2008	GOVERNMENT	CAT1, CAT2	2	16	0
3	2	79	2009	0	30	MSN	2	6	1	1	1	1	1			Cat IV	9	1	3	3	NEGATIVE						10	MEHSANA	30	2	13.3333	150		NA	NA	30		0.8		0.5	8	0	2	2003	GOVERNMENT	CAT3, CAT2	2	14	0
3	2	80	2009	1	70	GNR	2	7	1	1	1	1	1			Cat IV	3	3	3	3	NEGATIVE						5	Gandhinagar	45	4	14.5274	176		NA	NA			0.9			0	0	2	2008	PRIVATE	HRZES,CAT2	2	12	0
3	2	81	2009	0	35	AMC	2	5	1	1	1	2	1			Cat IV	2	2	2	1	NEGATIVE						10	EAST ZONE	50	4	22.2222	150		NA	Km STOPPED	51		0.6	0.8	0.7	1	15	3	2005	GOVERNMENT	CAT3, CAT2 TWICE	1	22	0
3	2	82	2009	0	34	AMC	2	5	1	1	1	1	1			Cat IV	2	2	2	1	NEGATIVE						10	SEWA	42	3	13.7143	175		NA	NA	42		0.9			14	0	3	1998	PRIVATE	HRZES,CAT2 TWICE	1	24	0
3	2	83	2009	1	43	AMC	2	7	1	1	1	1	1			Cat IV	3	3	3	3	NEGATIVE						5	SCL HOSPITAL	45	4	15.5709	170		NA	NA			0.9			0	0	2	2008	GOVERNMENT	CAT1, CAT2	2	12	0
3	2	84	2009	1	22	AMD	2	7	1	1	1	1	1			Cat IV	2	2	2	2	NEGATIVE						4	DHANDHUKA	44	3	19.5556	150		NA	NA			0.6					5	2005	PRIVATE	HRZE,THRICE, CAT2TWICE	1	23	0
3	2	85	2009	1	34	AMC	2	5	1	1	1	2	1			Cat IV	1	1	4	4	NEGATIVE						10	NORTH CENTRAL	56	4	18.9292	172		NA	NA	51		0.4			53	0	3	1993	GOVERNMENT	CAT1, CAT2 TWICE	1	18	0
3	2	86	2009	1	35	MSN	2	6	1	1	1	2	1			Cat IV	2	2	2	1	NEGATIVE						4	KHERALU	42	3	21.4286	140		NA	NA	43		0.7		0.9	0	0	3	2004	GOVERNMENT	CAT1, CAT2 TWICE	1	19	0
3	2	87	2009	1	40	SBK	2	6	1	1	1	1	1			Cat IV	2	2	2	1	NEGATIVE						6	MEGHARAJ	44	3	15.2249	170		NA	KmSTOPPED	44		0.9			0	25	2	2007	GOVERNMENT	CAT2 TWICE	1	9	0
3	2	88	2009	1	23	MSN	2	6	1	1	1	2	1			Cat IV	2	2	2	1	NEGATIVE						2	VISNAGAR	44	3	15.2249	170		NA	NA	46		0.9		0.8	1	120	2	2007	GOVERNMENT	CAT1, CAT2	2	14	0
3	2	89	2009	0	22	AMC	2	5	1	1	1	1	1			Cat IV	2	2	1	3	NEGATIVE						10	NORTH CENTRAL	30	2	11.4312	162		NA	NA	28		0.8			0	0	3	2003	GOVERNMENT	CAT1, CAT2	2	21	0
3	2	90	2009	1	50	SBK	2	7	1	1	1	2	1			Cat IV	2	1	2	3	NEGATIVE						2	BHILODA	38	3	16.8889	150		NA	NA	40		0.6	0.9		15	24	3	2006	PRIVATE	HRZES, CAT2 TWICE	1	17	0
3	2	91	2009	1	24	KDA	2	5	1	1	1	2	1			Cat IV	2	2	1	1	POSITIVE						10	KHEDA	55	4	21.4844	160		NA	NA	50		0.6	0.9	0.7	23	25	3	2005	GOVERNMENT	CAT1, CAT2	2	5	1
3	2	92	2009	1	35	BAN	2	6	1	1	1	1	1			Cat IV	2	2	2	1	NEGATIVE						1	PALANPUR	45	4	15.5709	170		NA	NA	45		0.6			0	0	2	2006	GOVERNMENT	CAT1, CAT2	2	14	0
3	2	93	2009	0	18	AMC	1	6	1	1	1	2	1			Cat IV	2	2	2	1	NEGATIVE						10	EAST ZONE	32	2	15.0122	146		NA	PZ STOPPED	33		0.7	0.8	0.6	0	0	2	2009	GOVERNMENT	CAT1, CAT2	2	8	0
3	2	94	2009	1	35	BAN	2	6	1	1	1	1	1			Cat IV	1	1	1	6	NEGATIVE						5	DIODAR	36	3	12.1687	172		NA	CS STOPPED	37		0.6			71	0	3	2005	PRIVATE	HRZE, CAT2,ND1	2	21	0
3	2	95	2009	1	30	AMC	1	6	1	1	1	2	2			Cat IV	2	2	2	1	NEGATIVE						7	SOUTH ZONE	60	4	19.5918	175		NA	NA	65		0.8			1	136	2	2008	GOVERNMENT	CAT1, CAT2	2	9	0
3	2	96	2009	1	47	AMD	2	4	1	1	1	1	1			Cat IV	2	2	2	1	NEGATIVE						4	DHANDHUKA	44	3	15.5896	168		NA	NA	48		0.1			16	26	3	1985	GOVERNMENT	HRZES, CAT1, CAT2	2	33	0
3	2	97	2009	0	46	AMD	2	6	3					1	1	Cat IV	2	2	2	1	NEGATIVE						3	VIRAMGAM	38	3	15.2219	158		NA	NA	34		0.7			0	0	4	1995	GOVERNMENT	HRZES, CAT2 THRICE	1	22	0
3	2	98	2009	1	65	AMD	2	7	1	1	1	1	1			Cat IV	4	4	4	4	NEGATIVE						10	EAST ZONE	50	4	17.301	170		NA	NA			0.5			62	0	2	1997	GOVERNMENT	HRZE, CAT2	2	8	0
3	2	99	2009	1	28	SRN	2	5	1	1	1	1	2			Cat IV	2	2	2	1	NEGATIVE						11	SAYLA	50	4	17.7154	168		NA	NA	52		0.6	0.9	0.9	0	0	3	2007	GOVERNMENT	CAT1, CAT2 TWICE	1	23	0
3	2	100	2009	1	22	BAN	2	7	1	1	1	1	1			Cat IV	1	1	1	6	NEGATIVE						5	THARAD	43	3	12.5639	185		NA	NA	41		0.7	0.8	0.8	0	0	2	2006	PRIVATE	HRZE, CAT2	2	38	0
3	2	101	2009	1	20	AMC	2	7	1	1	1	1	1			Cat IV	1	1	4	4	NEGATIVE						10	SOUTH ZONE	35	3	12.8558	165		NA	NA	36		0.7			110	0	4	2003	GOVERNMENT	CAT1, CAT2 THRICE	1	21	0
3	2	102	2009	0	18	AMC	2	5	1	1	1	1	1			Cat IV	2	2	2	3	NEGATIVE						10	SCL HOSPITAL	33	2	14.0971	153		NA	NA	34		0.7	1.2	0.8	12	0	3	2006	GOVERNMENT	CAT1, CAT2 TWICE	1	18	0
3	2	103	2009	1	21	AMC	2	5	1	1	1	1	1			Cat IV	2	2	2	1	NEGATIVE						10	AMRAIWADI	55	4	20.202	165		NA	CS STOPPED	57		0.8			0	0	3	2003	GOVERNMENT	CAT1, CAT2 TWICE	1	15	0
3	2	104	2009	1	22	GNR	2	5	1	1	1	1	1			Cat IV	2	2	1	4	NEGATIVE						10	GANDHINAGAR	66	5	21.551	175		NA	NA	70		1	0.9		90	0	3	2006	GOVERNMENT	CAT1, CAT2 TWICE	1	22	0
3	2	105	2009	1	39	AMD	2	5	1	1	1	2	1			Cat IV	1	1	1	8	NEGATIVE						1	BAVLA	38	3	14.8438	160		NA	NA			0.4			52	48	2	2008	GOVERNMENT	CAT1, CAT2	2	14	0
3	2	106	2009	1	30	GNR	2	7	1	1	1	1	1			Cat IV	2	2	2	1	NEGATIVE						9	GANDHINAGAR	55	4	19.0311	170		NA	NA	55		0.5	0.9		6	28	2	2008	PRIVATE	HRZE, CAT2	2	8	0
3	2	107	2009	1	35	AMC	2	6	1	1	1	1	1			Cat IV	2	2	2	4	NEGATIVE						10	SOUTH ZONE	34	2	12.6413	164	2009-04-12	ADR	KM STOPPED	34		0.6			11	0	3	2007	PRIVATE	HRZE, CAT2 TWICE	1	18	0
3	2	108	2009	0	25	GNR	2	5	3					1	2	Cat IV	1	1	1	6	NEGATIVE						9	GANDHINAGAR	32	2	14.0345	151		NA	NA			0.9			78	120	2	2007	GOVERNMENT	CAT2, ND1	2	10	0
3	2	109	2009	1	28	AMC	2	7	3					1	1	Cat IV	2	1	4	4	NEGATIVE						4	LGH HOSPITAL	44	3	17.4044	159		NA	NA	45		0.8	1		2	0	2	1999	GOVERNMENT	CAT1, CAT2	2	12	0
3	2	110	2009	1	40	SBK	2	5	3					1	1	Cat IV	1	1	1	4	NEGATIVE						1	IDAR	49	4	15.1235	180		NA	KM STOPPED	53		0.6	0.7	0.9	0	0	2	2008	PRIVATE	HRZE, CAT2	2	9	0
3	2	111	2009	0	20	AMC	2	7	3					1	1	Cat IV	1	3	3	3	NEGATIVE						10	EAST ZONE	41	3	16.8475	156		NA	NA			0.8	0.8		0	0	2	2008	PRIVATE	HRZE,CAT2	2	9	0
3	2	112	2009	1	40	AMC	1	6	1	1	1	1	1			Cat IV	2	2	2	1	NEGATIVE						9	MEMNAGAR	53	4	19.4674	165		NA	NA	46	48	0.8			7	0	1	2008	GOVERNMENT	CAT1	2	5	0
3	2	113	2009	1	65	AMC	2	7	1	1	1	1	1			Cat IV	2	2	2	4	NEGATIVE						10	CENTRAL ZONE	65	5	23.03	168		NA	NA	65		0.6			28	0	2	2008	PRIVATE	HRZE, CAT2	2	10	0
3	2	114	2009	1	22	GNR	2	7	1	1	1	1	1			Cat IV	2	1	1	6	NEGATIVE						9	GANDHINAGAR	44	3	17.1875	160		NA	NA	50		0.7	0.8	0.9	24	20	3	2006	GOVERNMENT	CAT1, CAT2 TWICE	1	18	0
3	2	115	2009	1	30	GNR	2	6	3					1	1	Cat IV	2	2	3	3	NEGATIVE						10	BAVLA	42	3	18.6667	150		NA	NA	40		0.6	0.8	0.8	13	0	3	2005	GOVERNMENT	CAT1, CAT2 TWICE	1	16	0
3	2	116	2009	1	52	MSN	2	6	3					1	2	Cat IV	9	2	2	1	NEGATIVE						5	VISNAGAR	40	3	13.2118	174		NA	NA	36		0.6	0.6	0.8	0	0	2	2008	GOVERNMENT	CAT1, CAT2	2	12	0
3	2	117	2009	1	36	BAN	2	6	1	1	1	2	1			Cat IV	1	3	3	3	NEGATIVE						1	DANTA	41	3	16.8475	156		NA	NA	41		0.6			5	0	1	2008	GOVERNMENT	CAT2	2	8	0
3	2	118	2009	1	49	MSN	1	6	3					1	1	Cat IV	2	2	2	1	NEGATIVE						9	MEHSANA	45	4	19.4771	152		NA	NA	48		0.9		0.8	12	0	1	2009	GOVERNMENT	CAT1	2	6	0
3	2	119	2009	1	45	BAN	2	5	3					1	1	Cat IV	2	2	2	1	NEGATIVE						2	PALANPUR	50	4	17.301	170	12/31/2009	ADR	KM STOPPED	44		0.9	0.9		65	0	3	2007	GOVERNMENT	CAT1, CAT2 TWICE	1	22	0
3	2	120	2009	0	45	AMD	2	5	1	1	1	1	1			Cat IV	1	2	3	3	NEGATIVE						3	BAVLA	35	3	16.6468	145		NA	NA	37		0.7			0	0	2	2003	GOVERNMENT	CAT1, CAT2	2	14	0
3	2	121	2009	1	50	BAN	2	5	1	1	1	1	1			Cat IV	2	2	2	3	NEGATIVE						10	VAV	50	4	16.5147	174		NA	NA	53		0.8			0	0	4	2005	GOVERNMENT	CAT2 THRICE, ND	1	36	1
3	2	122	2009	1	30	BAN	2	7	3					1	1	Cat IV	2	2	2	4	NEGATIVE						5	PALANPUR	50	4	19.052	162		NA	CS STOPPED	48		0.8			3	0	3	2007	GOVERNMENT	CAT1, CAT2 TWICE	1	20	0
3	2	123	2009	1	45	AND	2	6	1	1	1	2	1			Cat IV	2	2	2	1	NEGATIVE						9	SARSA	45	4	19.2234	153		NA	NA	47		0.6			3	0	4	2004	GOVERNMENT	CAT1, CAT2 THRICE	1	28	0
3	2	124	2009	0	23	AMC	1	6	1	1	1	1	1			Cat IV	2	2	2	1	NEGATIVE						9	AMRAIWADI	38	3	15.6147	156		NA	NA	38		0.6			0	0	1	2008	GOVERNMENT	CAT1	2	6	0
3	2	125	2009	1	32	AMC	2	7	1	1	2	2	1			Cat IV	4	4	4	4	NEGATIVE						10	CENTRAL ZONE	60	4	18.937	178		NA	NA			0.8			0	0	3	1996	GOVERNMENT	NTP,HRZE,CAT2	2	32	0
3	2	126	2009	1	18	AMC	2	6	3					1	1	Cat IV	2	2	4	4	NEGATIVE						10	NORTH CENTRAL	52	4	15.3592	184		NA	CS STOPPED	55		0.7			0	0	2	2007	GOVERNMENT	CAT2 TWICE	1	18	0
3	2	127	2009	1	55	AMC	2	5	3					1	2	Cat IV	1	1	1	6	NEGATIVE						10	NORTH CENTRAL	48	4	15.1496	178		NA	NA	46		0.6	0.6	0.9	12	52	2	2008	GOVERNMENT	CAT1, CAT2	2	15	0
3	2	128	2009	1	44	GNR	2	5	1	1	1	1	1			Cat IV	2	2	1	6	NEGATIVE						5	DEHGAM	52	4	17.9931	170		NA	NA	55		0.6	1.2		5	2	3	2007	PRIVATE	HRZE,CAT1, CAT2	2	15	0
3	2	129	2009	1	35	MSN	1	6	3					1	1	Cat IV	2	2	2	4	NEGATIVE						9	VISNAGAR	55	4	20.202	165		NA	NA	56		0.7		0.9	0	0	2	2009	GOVERNMENT	CAT1, CAT2	2	6	0
3	2	130	2009	1	50	AMC	2	5	3					1	1	Cat IV	1	1	3	3	NEGATIVE						10	SOUTH ZONE	35	3	11.5603	174		NA	NA	36		0.6		0.7	0	0	3	2008	GOVERNMENT	CAT1, CAT2 TWICE	1	21	0
3	2	131	2009	1	40	KDA	2	7	3					1	2	Cat IV	2	2	2	1	NEGATIVE						9	NADIAD	45	4	16.5289	165		NA	NA	41		0.9	0.9	1	25	28	2	2007	PRIVATE	HRZE, CAT2	2	18	1
3	2	132	2009	1	60	AMC	2	7	3					1	2	Cat IV	2	2	2	2	NEGATIVE						10	CENTRAL ZONE	42	3	15.2417	166		NA	NA	42		0.6			0	33	2	2008	PRIVATE	HRZE, CAT2	2	7	0
3	2	133	2009	0	45	AMC	2	5	3					1	1	Cat IV	2	2	2	1	NEGATIVE						10	EAST ZONE	33	2	14.0971	153	11/22/2009	ADR	KM STOPPED	33		0.9	0.7		10	0	3	1998	GOVERNMENT	CAT1, CAT2 TWICE	1	15	0
3	2	134	2009	1	20	AMC	1	6	3					1	1	Cat IV	2	2	2	6	NEGATIVE						10	NORTH CENTRAL	45	4	23.6295	138	2010-07-03	ADR	Etio stopped	50		0.7			5	3	1	2009	GOVERNMENT	CAT1	2	5	0
3	2	135	2009	0	35	AMC	1	5	3					1	1	Cat IV	2	2	2	1	NEGATIVE						10	EAST ZONE	34	2	13.7937	157		NA	NA	35		0.6	0.8	0.6	0	0	2	2002	GOVERNMENT	CAT1, CAT2	2	12	0
3	2	136	2009	1	48	MSN	2	5	3					1	1	Cat IV	2	2	2	3	NEGATIVE						5	VISNAGAR	50	4	17.7154	168		NA	NA	50		0.6		0.9	0	0	3	2004	GOVERNMENT	CAT2 THRICE	2	21	0
3	2	137	2009	1	35	AND	2	5	3					1	2	Cat IV	2	2	2	1	NEGATIVE						9	SARSA	49	4	19.1406	160	2009-05-10	ADR	KM STOPPED	45		0.5			0	0	2	2006	GOVERNMENT	CAT1, CAT2	2	10	1
3	2	138	2009	1	35	MSN	2	6	3					1	1	Cat IV	2	2	1	3	NEGATIVE						4	VISNAGAR	40	3	12.7677	177		NA	NA	44		0.7		0.9	0	0	3	2006	PRIVATE	SHERZ, CAT2 TWICE	1	24	0
3	2	139	2009	1	24	KDA	2	6	3					1	1	Cat IV	2	2	1	3	NEGATIVE						9	NADIAD	35	3	11.8307	172		NA	NA	30		0.7	0.7	0.9	27	0	4	2006	GOVERNMENT	CAT1, CAT2 TWICE, ND	1	28	0
3	2	140	2009	1	23	BAN	2	6	3					1	1	Cat IV	1	1	1	6	NEGATIVE						1	THARAD	50	4	15.7808	178		NA	NA	54		0.9			15	0	4	2006	PRIVATE	HRZE,CAT2 THRICE	1	22	0
3	2	141	2009	1	26	AMC	1	7	3					1	1	Cat IV	2	2	2	1	NEGATIVE						10	MEMNAGAR	45	4	15.5709	170		NA	NA	45		0.4			7	0	2	2007	PRIVATE	HRZE, CAT2	2	14	0
3	2	142	2009	1	37	AMC	2	6	3					1	1	Cat IV	2	2	2	6	NEGATIVE		2012-12-01				9	MEMNAGAR	55	4	19.0311	170		NA	NA	55		0.4			13	0	2	1999	GOVERNMENT	CAT1, CAT2	2	16	0
3	2	143	2009	1	50	BAN	2	5	3					1	2	Cat IV	1	1	1	3	NEGATIVE						5	VAV	48	4	17.6309	165		NA	NA	50		0.8			23	14	3	2008	GOVERNMENT	CAT2 THRICE	2	17	0
3	2	144	2009	0	26	PAT	2	7	3					1	1	Cat IV	1	3	3	3	NEGATIVE						4	CHANSMA	36	3	16	150		NA	NA			0.7			1	0	3	2007	GOVERNMENT	CAT1, CAT2 TWICE	1	12	0
3	2	145	2009	1	32	AMC	2	6	3					1	1	Cat IV	2	2	2	1	NEGATIVE						10	MEMNAGAR	34	2	12.0465	168		NA	NA	36		0.6			5	3	2	2007	PRIVATE	HRZE, CAT2	2	14	0
3	2	146	2009	1	54	KDA	2	6	1	1	1	1	1			Cat IV	2	1	1	1	NEGATIVE						5	KATHLAL	38	3	14.4795	162		NA	NA	37		0.7	0.9		32	39	4	1999	PRIVATE	HRZE, CAT2 THRICE	1	33	0
3	2	147	2009	1	15	AMC	2	6	3					1	1	Cat IV	1	2	1	3	NEGATIVE						10	AMRAIWADI	30	2	14.878	142		NA	NA	30		0.6			8	1	3	2007	GOVERNMENT	CAT1, CAT2 TWICE	1	18	0
3	2	148	2009	0	33	GNR	2	5	1	1	1	1	1			Cat IV	3	3	3	3	NEGATIVE						3	DTC GANDHINAGAR	33	2	13.7357	155		NA	KM STOPPED			0.9			0	0	3	2006	PRIVATE	HRZE, CAT2 TWICE	1	22	0
3	2	149	2009	0	21	AMC	5	9	3					1	1	Cat IV	2	2	2	1	NEGATIVE						10	AMRAIWADI	36	3	16	150	12/17/2009	ADR	CS STOP,PZ	32		0.6			0	0		2009		NA	2	0	0
3	2	150	2009	1	20	MSN	2	6	3					1	1	Cat IV	2	2	2	4	NEGATIVE						5	DTC MEHSANA	40	3	15.625	160		NA	NA	42		0.6			3	0	2	2008	PRIVATE	HRZE, CAT2	2	12	0
3	2	151	2009	0	32	AMC	2	7	1	1	1	2	1			Cat IV	2	2	2	1	POSITIVE						10	EAST ZONE	51	4	20.9566	156		NA	NA	51		0.5	0.8	0.6	0	0	2	2008	PRIVATE	HRZE, CAT2	2	13	0
3	2	152	2009	0	30	AMC	1	6	3					1	1	Cat IV	2	2	2	1	NEGATIVE						10	SCL HOSPITAL	40	3	20.4082	140		NA	NA	47	44	0.5	0.7	0.9	0	0	1	2009	GOVERNMENT	CAT1	2	6	0
3	2	153	2009	1	44	AMC	2	7	3					1	1	Cat IV	2	2	2	1	NEGATIVE						4	LGH HOSPITAL	59	4	21.6713	165		NA	NA	60		1.2			11	16	4	2006	PRIVATE	HRZE, CAT2 THRICE	1	37	0
3	2	154	2009	1	25	AMC	1	6	3					1	1	Cat IV	2	2	2	2	NEGATIVE						9	AMRAIWADI	44	3	16.1616	165		NA	NA	46		1.5			0	0	1	2009	GOVERNMENT	CAT1	2	6	0
3	2	155	2009	1	17	AMC	2	5	3					1	1	Cat IV	2	2	4	4	NEGATIVE						10	AMRAIWADI	44	3	19.5556	150		NA	NA	44		0.4			23	52	2	2007	GOVERNMENT	CAT1, CAT2	2	10	0
3	2	156	2009	1	30	KDA	2	7	3					1	1	Cat IV	2	1	1	6	NEGATIVE						10	BALASINOR	42	3	14.5329	170		NA	NA	42		0.3	0.7	1.1	8	14	2	2008	GOVERNMENT	CAT1, CAT2	2	11	0
3	2	157	2009	1	15	KDA	2	6	3					1	2	Cat IV	2	2	2	1	NEGATIVE						4	BALASINOR	29	2	13.7931	145		NA	NA	28		0.5	0.3	0.7	0	18	2	2009	GOVERNMENT	CAT1, CAT2	2	10	0
3	2	158	2009	1	42	GNR	2	6	3					1	2	Cat IV	4	4	4	4	NEGATIVE						9	DTC GANDHINAGAR	66	5	31.3912	145		NA	PZ stopped			0.8	1		9	0	2	2008	GOVERNMENT	CAT1, CAT2	2	13	0
3	2	159	2009	1	22	AMD	2	6	1	1	1	1	2			Cat IV	2	2	2	1	NEGATIVE						4	DHANDHUKA	50	4	19.5313	160		NA	NA	50		0.6			9	13	2	2008	GOVERNMENT	CAT1, CAT2	2	14	0
3	2	160	2009	1	23	AMD	2	6	1	1	1	2	1			Cat IV	2	2	2	1	NEGATIVE						4	DHANDHUKA	44	3	17.1875	160		NA	NA			0.3			12	0	3	2008	GOVERNMENT	CAT1, CAT2 TWICE	1	15	0
3	2	161	2009	1	32	BAN	2	6	3					1	1	Cat IV	2	2	2	4	NEGATIVE						2	DANTA	40	3	14.1723	168		NA	NA	42		0.9			10	38	2	2008	GOVERNMENT	CAT1, CAT2	2	10	0
3	2	162	2009	1	21	AMD	1	6	3					1	1	Cat IV	2	2	2	1	NEGATIVE						4	BAVLA	45	4	16.5289	165		NA	NA	51		0.5			0	16	1	2009	GOVERNMENT	CAT1	2	6	0
3	2	163	2009	0	35	KDA	2	6	1	1	1	2	1			Cat IV	1	2	1	3	NEGATIVE						4	KATHLAL	35	3	13.3364	162		NA	NA	35		0.4			13	37	2	2008	GOVERNMENT	CAT1, CAT2	2	9	0
3	2	164	2009	1	42	BAN	2	6	3					1	1	Cat IV	2	2	2	1	NEGATIVE						4	DEESA	40	3	12.6247	178		NA	NA	45		0.5			0	0	2	2007	GOVERNMENT	CAT2 TWICE	1	16	0
3	2	165	2009	1	18	BAN	2	6	3					1	1	Cat IV	1	1	3	3	NEGATIVE						3	DHANERA	35	3	14.9515	153	5/17/2010	ADR	PZ,CS stopped	32	32	0.6	0.9		33	89	2	2008	GOVERNMENT	CAT1, CAT2	2	9	0
3	2	166	2009	1	24	AND	2	5	3					1	1	Cat IV	4	4	4	4	NEGATIVE						10	SARSA	60	4	21.7738	166		NA	NA			0.5			56	0	3	2004	GOVERNMENT	CAT1, CAT2 TWICE	1	16	0
3	2	167	2009	1	22	AND	2	6	3					1	2	Cat IV	2	2	2	1	NEGATIVE						5	SARSA	45	4	15.2109	172		NA	NA	50		0.5			2	64	3	2004	GOVERNMENT	CAT1, CAT2 TWICE	1	24	0
3	2	168	2009	0	30	MSN	2	5	1	1	1	1	1			Cat IV	1	1	3	3	NEGATIVE						1	VISNAGAR	34	2	15.1111	150		NA	NA	35	28	0.7	0.6	0.7	17	13	2	2008	GOVERNMENT	CAT1, CAT2	2	10	0
3	2	169	2009	0	30	AMC	2	7	3					1	2	Cat IV	2	9	2	2	NEGATIVE						4	LGH HOSPITAL	35	3	13.3364	162		NA	NA	32		0.7	0.8		18	4	2	2009	GOVERNMENT	CAT1, CAT2	2	9	0
3	2	170	2009	0	28	KDA	2	6	3					1	2	Cat IV	2	2	1	3	NEGATIVE						4	KATHLAL	40	3	16.6493	155		NA	NA	41		0.6	0.9	0.5	62	0	4	2003	PRIVATE	HRZE, CAT2 TWICE, ND	1	32	0
3	2	171	2009	0	39	AMC	2	5	3					1	1	Cat IV	2	2	2	1	NEGATIVE						10	EAST ZONE	45	4	18.9745	154		NA	NA	45		0.8	0.7	0.5	0	1	4	1999	GOVERNMENT	NTP,CAT2 TWICE, ND	1	36	0
3	2	172	2009	1	24	AMC	2	7	3					1	1	Cat IV	2	2	1	6	NEGATIVE						4	AMRAIWADI	60	4	24.3418	157		NA	NA			0.5			0	0	2	2007	PRIVATE	HRZE, CAT2	2	12	0
3	2	173	2009	1	48	AMD	2	6	3					1	1	Cat IV	4	4	4	4	NEGATIVE						5	DHANDHUKA	55	4	19.487	168		NA	NA			1			8	0	2	2006	GOVERNMENT	CAT1, CAT2	2	14	0
3	2	174	2009	1	35	AMC	2	6	3					1	1	Cat IV	1	2	1	6	NEGATIVE						10	EAST ZONE	32	2	10.0997	178		NA	NA			0.6	0.7		24	8	2	2008	GOVERNMENT	CAT1, CAT2	2	9	0
3	2	175	2009	1	40	AMC	2	5	3					1	1	Cat IV	4	4	4	4	NEGATIVE						10	CENTRAL ZONE	45	4	15.5709	170		NA	NA			0.7			0	0	2	2008	GOVERNMENT	CAT1, CAT2	2	14	0
3	2	176	2009	0	30	AMD	2	5	1	1	1	1	1			Cat IV	1	2	1	3	NEGATIVE						4	DHANDHUKA	27	2	12.3265	148		NA	NA	26		0.8			74	1	2	2007	GOVERNMENT	CAT1, CAT2	2	12	0
3	2	177	2009	1	40	PAT	2	6	3					1	2	Cat IV	2	2	1	6	NEGATIVE						2	RADHANPUR	30	2	14.6706	143		NA	NA			0.4		0.9	0	16	4	2007	PRIVATE	HRZE, CAT2 TWICE, ND	1	21	0
3	2	178	2009	0	48	AND	2	6	1	1	1	1	1			Cat IV	2	2	1	6	NEGATIVE						4	KHAMBHAT	50	4	24.7967	142	2010-02-01	ADR	PZ	53	54	0.7	1	0.9	4	137	2	1985	GOVERNMENT	CAT1, CAT2	2	12	0
3	2	179	2009	0	22	AMC	2	7	3					1	1	Cat IV	4	4	4	4	NEGATIVE						10	SOUTH ZONE	52	4	23.74	148		NA	NA			0.4			40	0	3	2006	GOVERNMENT	CAT1, CAT2 TWICE	1	12	0
3	2	180	2009	1	31	AMC	2	5	3					1	1	Cat IV	2	2	2	1	NEGATIVE						10	NORTH CENTRAL	35	3	11.8307	172		NA	NA	37	35	0.7			0	0	3	2005	GOVERNMENT	CAT1, CAT2 TWICE	1	18	0
3	2	181	2009	0	52	BAN	2	7	1	1	1	1	1			Cat IV	2	3	3	3	NEGATIVE						9	DIODAR	28	2	13.1357	146		NA	NA	31		0.5			0	0	2	2007	PRIVATE	HRZE, CAT2	2	14	0
3	2	182	2009	1	48	AMC	2	7	3					1	1	Cat IV	2	2	9	6	NEGATIVE						10	CENTRAL ZONE	42	3	16.6133	159		NA	NA	42	42	1.5			69	20	3	1992	GOVERNMENT	NTP, NTP, CAT2	2	12	0
3	2	183	2009	1	31	AMC	2	6	3					1	1	Cat IV	2	4	4	4	NEGATIVE						10	EAST ZONE	40	3	15.8222	159		NA	NA	41		0.8	0.9		4	0	3	1988	GOVERNMENT	CAT1, CAT2 TWICE	1	16	0
3	2	184	2009	1	25	AMC	2	5	3					1	1	Cat IV	2	2	2	1	NEGATIVE						9	AMRAIWADI	46	4	20.1746	151		NA	NA	48	51	0.6			5	0	2	2006	GOVERNMENT	CAT1, CAT2	2	3	0
3	2	185	2009	1	52	AMC	2	6	3					1	1	Cat IV	2	2	4	4	NEGATIVE						10	SCL HOSPITAL	69	5	23.3234	172		NA	NA	72		0.7	0.9		12	10	2	2005	GOVERNMENT	CAT1, CAT2	2	14	0
3	2	186	2009	1	40	AND	2	5	3					1	1	Cat IV	2	1	1	3	NEGATIVE						9	SARSA	40	3	15.2416	162	3/19/2010	DIFFICULTY IN TAKING INJECTION	KM STOP	40	40	0.6	0.6		1	9	2	2008	GOVERNMENT	CAT1, CAT2	2	10	0
3	2	187	2009	1	52	AMD	2	5	1	1	1	2	2			Cat IV	2	2	2	8	NEGATIVE						4	DHANDHUKA	53	4	16.7277	178		NA	NA	58	56	0.4			51	200	3	1997	PRIVATE	PVT,CAT 2	2	22	0
3	2	188	2009	0	35	MSN	2	5	3					1	2	Cat IV	1	1	2	1	NEGATIVE						9	KHERALU	43	3	19.6311	148	2010-04-09	SGPT HIGH	ETHIO STOP	45	42	1			27	0	1	2009	GOVERNMENT	CAT2	2	3	0
3	2	189	2009	1	21	SRN	2	5	3					1	1	Cat IV	1	1	1	6	NEGATIVE						3	SAYLA	49	4	17.9982	165		NA	NA	48	49	0.4	1	0.6	41	5	2	2008	GOVERNMENT	CAT1, CAT2	2	11	0
3	2	190	2009	1	35	KDA	2	6	1	1	1	2	2			Cat IV	2	1	2	2	NEGATIVE						5	KATHLAL	51	4	18.7328	165		NA	NA	55	56	0.4	1	0.9	22	42	2	2007	GOVERNMENT	CAT1, CAT2	2	14	0
3	2	191	2009	1	45	SRN	2	6	1	1	1	1	1			Cat IV	2	2	2	2	NEGATIVE						3	LIMDI	58	4	20.5499	168		NA	NA	62	65	0.6	0.9	1.6	9	31	3	2008	PRIVATE	HRZE,CAT 2	2	21	0
3	2	192	2009	1	35	SBK	2	7	1	1	1	1	1			Cat IV	1	2	2	3	NEGATIVE						9	DTC HIMMATNAGAR	45	4	15.5709	170	2010-03-01	S.C HIGH 2.1	KM STOP	43	39	0.6	2.1		0	0	2	2008	PRIVATE	HRZE,CAT2	2	6	0
3	2	193	2009	0	14	AMC	1	5	3					1	1	Cat IV	2	1	3	3	NEGATIVE						9	WEST ZONE	30	2	14.4676	144		NA	NA	32		0.7	0.4	0.6	0	0	2	2008	GOVERNMENT	CAT1, CAT2	2	14	0
3	2	194	2009	1	20	GNR	2	5	3					1	1	Cat IV	2	2	2	1	NEGATIVE						1	MANSA	42	3	16.6133	159		NA	NA	50	52	0.6	0.7	0.9	1	200	1	2009	GOVERNMENT	CAT2	2	4	0
3	2	195	2009	1	28	BAN	2	6	1	1	1	1	2			Cat IV	4	4	4	4	NEGATIVE						5	DHANERA	40	3	15.625	160		NA	NA	40		0.6	0.8		131	0	3	2008	PRIVATE	PVT,CAT 2 TWICE	1	20	0
3	2	196	2009	1	23	AMC	2	7	1	1	1	2	1			Cat IV	2	2	2	1	NEGATIVE						9	LGH HOSPITAL	49	4	18.6709	162		NA	NA	53	54	0.4	0.6	0.5	2	0	2	2008	PRIVATE	HRZE CAT2	2	10	0
3	2	197	2009	1	28	AMC	2	5	3					1	1	Cat IV	2	2	2	2	NEGATIVE						10	SOUTH ZONE	50	4	15.4321	180		NA	NA	50	50	0.6	0.5	0.6	2	39	2	2007	GOVERNMENT	CAT3 CAT2	2	11	0
3	2	198	2009	1	23	AMC	2	5	3					1	1	Cat IV	2	2	2	4	NEGATIVE						10	SCL HOSPITAL	52	4	18.424	168		NA	NA	60	64	0.8	0.7	0.7	7	69	2	2007	GOVERNMENT	CAT1, CAT2	2	14	0
3	2	199	2009	1	22	AMC	2	5	3					1	1	Cat IV	4	4	4	4	NEGATIVE						10	AMRAIWADI	45	4	19.4771	152		NA	NA			0.4			0	0	2	2007	GOVERNMENT	CAT1, CAT2	2	10	0
3	2	200	2009	1	25	MSN	2	5	1	1	1	1	2			Cat IV	4	4	4	4	NEGATIVE						9	DTC MEHSANA	45	4	18.026	158		NA	NA			0.8			0	0	1	2008	GOVERNMENT	CAT2	2	8	0
3	2	201	2009	0	35	AMC	2	5	3					1	1	Cat IV	2	2	2	2	NEGATIVE						9	CHANDLODIA	43	3	19.6311	148		NA	NA	40	39	0.6			17	40	3	2003	GOVERNMENT	CAT1, CAT2 TWICE	1	23	0
3	2	202	2009	1	37	AND	2	5	3					1	1	Cat IV	1	2	1	6	NEGATIVE						5	ANKLAV	35	3	13.0131	164		NA	NA	34	35	0.4			0	32	3	2005	GOVERNMENT	CAT1, CAT2 TWICE	1	20	0
3	2	203	2009	0	33	AMC	2	1	1	1	1	1	1			Cat IV	2	2	2	1	NEGATIVE						10	EAST ZONE	35	3	14.758	154	2010-10-03	JOINT PAIN	PZ,CYCLO,ETHIO STOP	36	38	0.4	0.7	0.9	0	27	2	2009	GOVERNMENT	CAT1, CAT2	2	9	0
3	2	204	2009	1	24	AMC	2	1	3					1	1	Cat IV	4	4	4	4	NEGATIVE						10	LGH HOSPITAL	36	3	13.5496	163		NA	NA			0.6			3	0	1	2009	GOVERNMENT	CAT1	2	5	0
3	2	205	2009	0	42	AMC	2	7	3					1	1	Cat IV	2	2	2	4	NEGATIVE						10	NORTH CENTRAL	29	2	17.1598	130		NA	NA	29	32	0.7			0	0	2	2002	GOVERNMENT	CAT1, CAT2	2	17	0
3	2	206	2009	0	26	AMC	2	6	1	1	1	1	1			Cat IV	1	1	3	3	POSITIVE						9	AMRAIWADI	31	2	13.7778	150		NA	NA	36	32	0.8			0	0	1	2008	PRIVATE	HRZE CAT2	2	8	0
3	2	207	2009	1	36	GNR	2	7	3					1	2	Cat IV	4	4	4	4	NEGATIVE						5	DTC GANDHINAGAR	32	2	10.5694	174		NA	NA	34		0.6			8	0	2	2008	PRIVATE	HRZE CAT2	2	9	0
3	2	208	2009	0	16	AMC	2	7	1	1	1	1	1			Cat IV	1	2	2	1	NEGATIVE						10	SOUTH ZONE	32	2	14.4138	149		NA	NA	34	32	0.7			0	23	2	2007	PRIVATE	HRZE CAT2	2	10	0
3	2	209	2009	0	18	AMC	2	7	1	1	1	1	1			Cat IV	2	2	2	2	NEGATIVE						10	NORTH CENTRAL	41	3	16.0156	160		NA	NA	41	42	0.7	0.8		1	0	2	2008	PRIVATE	HRZE CAT2	2	6	0
3	2	210	2009	1	20	AMC	2	7	3					1	1	Cat IV	1	1	1	6	NEGATIVE						10	NORTH CENTRAL	44	3	16.1616	165		NA	NA	43	44	0.9			0	0	3	2006	PRIVATE	HRZE TWICE CAT2	1	14	0
3	2	211	2009	1	49	AMD	2	6	3					1	2	Cat IV	9	1	1	6	NEGATIVE						1	BAVLA	50	4	18.1449	166		NA	NA	51	50	0.5			21	33	1	2009	GOVERNMENT	CAT1	2	6	0
3	2	212	2009	0	19	AMC	2	6	3					1	1	Cat IV	2	2	2	1	NEGATIVE						10	SCL HOSPITAL	30	2	13.6961	148		NA	NA	32	31	0.4	0.6		0	1	1	2009	GOVERNMENT	CAT1	2	6	0
3	2	213	2009	1	38	AMC	2	6	1	1	1	1	1			Cat IV	3	3	3	3	NEGATIVE						10	AMRAIWADI	50	4	16.1415	176		NA	NA			0.7			0	0	3	2008	GOVERNMENT	CAT1, CAT2	2	14	0
3	2	214	2009	1	22	AMC	2	6	1	1	1	1	1			Cat IV	1	2	3	3	NEGATIVE						10	CENTRAL ZONE	42	3	14.5329	170		NA	NA	43	43	0.6			0	0	2	2008	GOVERNMENT	CAT1, CAT2	2	14	0
3	2	215	2009	1	71	AMC	2	5	3					1	1	Cat IV	1	1	1	6	NEGATIVE						10	SCL HOSPITAL	41	3	14.5266	168	3/29/2010	GIDDINESS	KM STOP	39	40	0.6	0.7	0.8	0	0	3	2005	GOVERNMENT	CAT1, CAT2 TWICE	1	22	0
3	2	216	2009	1	50	PAT	2	7	3					1	2	Cat IV	1	4	4	4	NEGATIVE						1	CHANSMA	45	4	15.5709	170		NA	NA	45		0.9	0.9	0.9	10	0	2	2008	PRIVATE	HRZE,CAT2	2	12	0
3	2	217	2009	1	32	BAN	2	7	3					1	1	Cat IV	1	2	2	1	NEGATIVE						1	THARAD	40	3	14.1723	168		NA	NA	45	46	0.6			0	0	3	2007	GOVERNMENT	CAT1, CAT2	2	19	0
3	2	218	2009	1	30	AMC	3	1	1	1	1	2	1			Cat IV	1	3	3	3	NEGATIVE						9	SOUTH ZONE	40	3	15.2416	162	5/27/2009	GIDDINESS	KM,CS STOP	38		0.6			21	0	1	2009	GOVERNMENT	CAT III,	2	6	0
3	2	219	2009	0	24	AMC	2	5	1	1	1	1	1			Cat IV	1	2	2	1	NEGATIVE						10	WEST ZONE	40	3	17.313	152		NA	NA	43	45	0.7			0	0	3	2005	GOVERNMENT	CAT1, CAT2 TWICE	1	22	0
3	2	220	2009	0	24	KDA	2	5	1	1	1	1	1			Cat IV	1	1	1	4	NEGATIVE						5	NADIAD	36	3	15.1796	154		NA	NA	43	39	0.8	0.8	0.7	3	9	4	2006	PRIVATE	HRZE CAT2 THRICE	1	23	0
3	2	221	2009	0	24	AMC	2	5	1	1	1	1	1			Cat IV	1	1	1	6	NEGATIVE						10	NORTH CENTRAL	35	3	15.9788	148		NA	PZ STOP	36	36	0.7			0	0	3	2007	PRIVATE	HRZE CAT2 TWICE	1	18	0
3	2	222	2009	1	30	AMC	2	6	3					1	2	Cat IV	2	2	2	4	NEGATIVE						11	MEMNAGAR	37	3	16.8919	148		NA	NA	36	36	0.5			6	200	4	2006	PRIVATE	HRZE CAT2 THRICE	1	30	0
3	2	223	2009	0	23	AMC	1	1	3					1	1	Cat IV	2	2	2	1	NEGATIVE						10	NORTH CENTRAL	35	3	15.1489	152		NA	NA	35	41	0.7			0	0	1	2009	GOVERNMENT	CAT1	2	5	0
3	2	224	2009	1	50	KDA	2	6	3					1	1	Cat IV	1	2	2	1	NEGATIVE						4	KATHLAL	36	3	13.2231	165		NA	NA	37	38	0.5	0.5	0.8	8	0	2	2005	GOVERNMENT	CAT1, CAT2	2	11	0
3	2	225	2009	1	35	BAN	2	6	1	1	1	1	1			Cat IV	2	2	2	1	NEGATIVE						5	DEESA	62	4	20.9573	172		NA	NA	64	60	0.7			0	0	3	2006	GOVERNMENT	CAT2 TWICE ND1	1	28	1
3	2	226	2009	1	24	AND	2	5	3					1	2	Cat IV	2	2	2	1	NEGATIVE						9	KHAMBHAT	45	4	16.7311	164		NA	NA	50	54	0.7			0	0	3	2004	GOVERNMENT	CAT1, CAT2	2	22	0
3	2	227	2009	0	25	AMD	2	6	3					1	1	Cat IV	3	3	3	3	NEGATIVE						5	BAVLA	25	2	11.4134	148		NA	NA						0	0	2	2008	GOVERNMENT	CAT1, CAT2	2	7	0
3	2	228	2009	1	33	GNR	2	5	3					1	1	Cat IV	1	1	3	3	NEGATIVE						9	DTC GANDHINAGAR	33	2	12.5743	162		NA	NA	39		0.7	0.8		6	0	2	2006	GOVERNMENT	CAT1, CAT2	2	12	0
3	2	229	2009	1	30	BAN	2	6	1	1	1	1	1			Cat IV	9	2	4	4	NEGATIVE						1	DTC PALANPUR	42	3	14.1969	172		NA	NA	43	47	0.6			29	102	4	2006	GOVERNMENT	CAT1, CAT2 TWICE, ND	1	31	0
3	2	230	2009	1	16	AND	2	6	3					1	2	Cat IV	2	2	3	3	NEGATIVE						5	SARSA	25	2	11.4134	148		NA	NA			0.5			0	0	2	2007	PRIVATE	HRZE, CAT2	2	10	0
3	2	231	2009	0	21	AMC	2	5	1	1	1	1	1			Cat IV	2	2	2	1	NEGATIVE						9	CENTRAL ZONE	40	3	17.5431	151		NA	PZ STOP	41	40	0.7		0.6	0	0	4	2005	GOVERNMENT	CAT1, CAT2 TWICE	1	20	0
3	2	232	2009	1	25	SBK	2	6	1	1	1	1	1			Cat IV	2	2	1	8	NEGATIVE						5	KHEDBRAHMA	40	3	15.625	160		NA	NA	38	40	0.9			37	180	3	2004	PRIVATE	CAT1, CAT2	2	16	0
3	2	233	2009	0	16	AMC	3	1	3					1	1	Cat IV	3	3	3	3	NEGATIVE						10	SOUTH ZONE	22	1	10.6096	144		NA	NA			0.8			0	0	1	2009	GOVERNMENT	CAT3	2	2	0
3	2	234	2009	0	20	AMC	2	7	3					1	1	Cat IV	2	2	4	4	NEGATIVE						10	WEST ZONE	44	3	15.5896	168		NA	PZ STOP	55	54	0.7	0.7	0.7	0	6	2	2007	PRIVATE	HRZE, CAT2	2	14	0
3	2	235	2009	1	28	KDA	2	5	3					1	1	Cat IV	2	1	1	6	NEGATIVE						4	NADIAD	44	3	16.7657	162	4/29/2010	GYNECOMASTIA	ETHIO STOP	44	41	0.9	0.9	0.9	4	13	2	1998	GOVERNMENT	NTCP, CAT2	2	18	0
3	2	236	2009	0	35	PAT	2	6	3					1	1	Cat IV	1	2	2	1	NEGATIVE						5	RADHANPUR	37	3	16.4444	150		NA	NA	39	38	0.9	0.9	1.1	0	53	3	2007	PRIVATE	HRZE, CAT2 TWICE	1	20	0
3	2	237	2009	0	22	AMC	2	7	3					1	1	Cat IV	1	1	1	3	NEGATIVE						10	CENTRAL ZONE	36	3	17.8536	142		NA	NA	36	36	0.7			22	0	2	2007	PRIVATE	HRZE, CAT2	2	13	0
3	2	238	2009	0	40	AMC	2	6	3					1	1	Cat IV	2	2	3	3	NEGATIVE						10	CHANDLODIA	34	2	14.7161	152		NA	NA	33		0.6			1	0	3	2007	GOVERNMENT	HRZE, CAT1, CAT2	2	16	0
3	2	239	2009	1	38	KDA	2	5	1	1	1	1	1			Cat IV	2	1	1	3	NEGATIVE						5	MATAR	43	3	15.9875	164		NA	NA	49	50	0.6	0.9	1.2	0	0	5	2003	PRIVATE	HRZE, CAT 2 FOUR TIME	1	33	0
3	2	240	2009	1	48	KDA	2	6	1	1	1	1	2			Cat IV	4	4	4	4	NEGATIVE						3	KATHLAL	61	4	20.148	174		NA	NA			0.7			17	0	2	2008	GOVERNMENT	CAT1, CAT2	2	7	0
3	2	241	2009	0	25	BAN	5	9	1	1	1	1	1			Cat IV	1	1	3	3	NEGATIVE						5	DTC PALANPUR	40	3	16.8663	154	12/18/2009	DIFFICULTY IN TAKING INJECTION	KM STOP	43		0.7		1.3	2	0	2	2008	GOVERNMENT	CAT1, CAT2	2	12	0
3	2	242	2009	0	20	PAT	2	5	1	1	1	1	1			Cat IV	1	1	1	3	NEGATIVE						2	CHANSMA	36	3	16.4354	148		NA	NA	37	36	0.8	0.8	0.8	76	0	2	2008	GOVERNMENT	CAT1, CAT2	2	11	0
3	2	243	2009	1	25	KDA	2	6	3					1	1	Cat IV	9	1	1	6	NEGATIVE						3	BALASINOR	40	3	15.4315	161		NA	CS STOP	40	38	0.9	0.6	0.9	81	75	2	2009	GOVERNMENT	CAT1, CAT2	2	11	0
3	2	244	2009	0	25	AMD	2	6	3					1	1	Cat IV	2	2	3	3	NEGATIVE						4	VISNAGAR	40	3	17.7778	150		NA	PZ STOP	41		0.7			0	0	3	2008	PRIVATE	HRZE, CAT2	2	12	0
3	2	245	2009	0	46	AMD	2	5	3					1	2	Cat IV	1	1	9	3	NEGATIVE						2	DHANDHUKA	22	1	10.0438	148		NA	ETHIO,KM STOP	20	19	0.6			35	154	3	2005	GOVERNMENT	CAT1, CAT2 TWICE	1	19	0
3	2	246	2009	0	45	AMD	2	6	3					1	2	Cat IV	1	1	1	3	NEGATIVE						2	VIRAMGAM	32	2	14.2222	150		NA	NA		30	0.7			4	0	1	2009	GOVERNMENT	CAT1	2	5	0
3	2	247	2009	1	28	AMD	2	7	3					1	1	Cat IV	4	4	4	4	NEGATIVE						10	DHANDHUKA	52	4	17.9931	170		NA	NA			0.6			0	0	3	2007	GOVERNMENT	CAT1, CAT2	2	20	0
3	2	248	2009	0	27	GNR	2	6	1	1	1	1	1			Cat IV	1	1	1	3	NEGATIVE						10	DEHGAM	34	2	15.5223	148	2/25/2010	NA	KM STOP	34	36	0.7	0.7		0	0	3	2006	PRIVATE	HRZE, CAT2 TWICE	1	19	0
3	2	249	2009	1	40	AMC	2	1	3					1	2	Cat IV	4	4	4	4	NEGATIVE						10	WEST ZONE	42	3	15.2417	166		NA	NA			0.6	0.6		146	0	1	2009	GOVERNMENT	CAT1	2	5	0
3	2	250	2009	1	60	SBK	2	6	3					1	2	Cat IV	2	2	1	6	NEGATIVE						9	DHANSURA	45	4	16.5289	165		NA	NA	45	43	0.7	1.1	1.1	0	18	2	2009	GOVERNMENT	CAT1, CAT2	2	9	0
3	2	251	2009	1	27	AMC	2	1	3					1	1	Cat IV	2	2	1	6	POSITIVE						1	SCL HOSPITAL	45	4	17.5781	160		NA	NA	41	41	0.7	1.8	0.6	0	3	2	2001	PRIVATE	HRZE, CAT2	2	18	0
3	2	252	2009	0	25	AMC	1	1	3					1	1	Cat IV	3	3	3	3	NEGATIVE						10	SOUTH ZONE	30	2	13.6961	148		NA	NA	34		0.5			29	0	1	2009	GOVERNMENT	CAT1	2	7	0
3	2	1	2010	1	23	AMC	2	7	3					1	1	Cat IV	1	1	1	9	NEGATIVE						10	LGH HOSPITAL	39	3	14.5003	164		NA	NA	40	37	0.6	0.9	0.9	0	0	2	2007	GOVERNMENT	HRZE,CAT2	2	10	0
3	2	2	2010	1	32	AMC	2	9	3					1	2	Cat IV	1	3	3	3	NEGATIVE						10	AMRAIWADI	34	2	13.9711	156		NA	NA	34		0.6		0.5	22	0	2	1997	GOVERNMENT	HRZE,CAT2	2	9	0
3	2	3	2010	0	30	AMC	1	1	3					1	1	Cat IV	2	2	2	9	NEGATIVE						10	SCL HOSPITAL	35	3	15.9788	148		NA	NA	36	36	0.6	0.5	0.5	10	4	1	2009	GOVERNMENT	CAT1	2	5	0
3	2	4	2010	1	45	AMC	2	7	3					1	1	Cat IV	4	4	4	4	NEGATIVE						10	SCL HOSPITAL	56	4	21.3382	162		NA	NA			0.5			13	0	2	2008	GOVERNMENT	HRZE,CAT2	2	11	1
3	2	5	2010	1	20	AND	2	5	3					1	2	Cat IV	2	2	2	9	NEGATIVE						5	KHAMBHAT	50	4	18.5901	164		NA	NA	58	58	0.6	0.8		1	12	2	2008	GOVERNMENT	CAT1,CAT2	2	10	0
3	2	6	2010	1	23	AMC	5	8	3					1	1	Cat IV	2	2	2	9	NEGATIVE						10	AMRAIWADI	44	3	16.3593	164		NA	NA	45	44	0.6			0	0	1	2009	PRIVATE	HRZE,KM,ETHI	2	1	0
3	2	7	2010	0	30	KDA	2	6	3					1	1	Cat IV	2	2	2	9	NEGATIVE						9	NADIAD	28	2	14.0838	141		NA	CS STOP	28	35	0.7	1	1.3	8	2	2	2008	GOVERNMENT	CAT1,CAT2	2	10	0
3	2	8	2010	1	40	AMC	2	7	1	1	1	1	1			Cat IV	2	2	2	9	NEGATIVE						10	SCL HOSPITAL	55	4	20.4491	164		NA	NA	60	65	0.5	0.9	0.7	13	14	2	2002	GOVERNMENT	HRZE,CAT2	2	7	0
3	2	9	2010	1	45	AMC	2	7	3					1	1	Cat IV	2	1	1	9	NEGATIVE						10	NORTH CENTRAL	42	3	16.4063	160		NA	NA	43	44	0.8			6	0	2	2007	GOVERNMENT	HRZE,CAT2	2	23	0
3	2	10	2010	1	55	AND	2	7	3					1	2	Cat IV	2	1	2	9	NEGATIVE						9	KHAMBHAT	57	4	20.1956	168	2010-09-04	DIFFICULTY IN TAKING INJECTION	KM STOP	65	65	0.7			1	0	2	2008	GOVERNMENT	HRZE,CAT2	2	16	0
3	2	11	2010	1	42	AMC	2	7	3					1	1	Cat IV	4	4	4	4	NEGATIVE						10	NORTH CENTRAL	30	2	11.1541	164		NA	NA			0.6			25	0	3	2005	GOVERNMENT	CAT1,CAT2 TWICE	1	10	0
3	2	12	2010	1	45	AMC	2	5	3					1	2	Cat IV	2	2	2	9	NEGATIVE						10	AMRAIWADI	49	4	18.2183	164		NA	NA	56	60	0.6	0.6		3	0	2	2000	GOVERNMENT	CAT1,CAT2 TWICE	1	16	0
3	2	13	2010	1	55	AMC	2	4	3					1	1	Cat IV	2	2	2	9	NEGATIVE						10	CHANDLODIA	45	4	17.5781	160		NA	NA	45	45	0.6		0.8	0	0	3	1978	GOVERNMENT	HRZE,HRZE,CAT2	2	16	0
3	2	14	2010	0	36	SRN	2	5	3					1	1	Cat IV	1	1	2	9	NEGATIVE						9	DHRANGDRA	35	3	14.758	154	2010-12-04	NOUSIA VOMITING AND CHEST PAIN	ETHIO STOP	37	37	0.7	0.6	0.6	11	2	3	2008	GOVERNMENT	CAT1,CAT2 TWICE	1	15	0
3	2	15	2010	1	25	AMD	2	5	3					1	1	Cat IV	2	2	2	9	NEGATIVE						2	DHANDHUKA	41	3	15.2439	164		NA	NA	45	48	0.8			0	0	2	2008	GOVERNMENT	CAT1,CAT2	2	13	0
3	2	16	2010	0	28	KDA	2	7	3					1	1	Cat IV	3	3	3	3	NEGATIVE						5	BALASINOR	28	2	12.7831	148		NA	NA			0.6			0	0	2	2008	GOVERNMENT	HRZE,CAT2	2	12	0
3	2	17	2010	1	30	BAN	2	5	3					1	2	Cat IV	2	2	2	9	NEGATIVE						3	DEESA	35	3	13.0131	164		NA	NA	38	39	0.5			0	10	3	2001	GOVERNMENT	HRZE,CAT2 TWICE	1	10	0
3	2	18	2010	0	15	GNR	2	7	3					1	2	Cat IV	1	1	4	4	NEGATIVE						9	DTC GANDHINAGAR	29	2	13.2396	148		NA	NA	30		0.6			61	0	2	2008	GOVERNMENT	HRZE,CAT2	2	16	0
3	2	19	2010	0	40	AMC	2	6	3					1	1	Cat IV	3	3	3	3	NEGATIVE						5	CENTRAL ZONE	28	2	16.8259	129		NA	NA			0.7			0	0				NA	2		0
3	2	20	2010	1	25	AMC	2	6	3					1	1	Cat IV	2	2	2	9	NEGATIVE						10	NORTH CENTRAL	45	4	16.937	163		NA	NA	48	48	0.7			0	0	3	2004	GOVERNMENT	CAT III, CAT2 TWICE	1	15	0
3	2	21	2010	0	29	AMC	1	1	3					1	1	Cat IV	2	9	2	9	NEGATIVE						9	WEST ZONE	41	3	17.7458	152		NA	NA	44	46	0.6	0.6		0	4	1	2009	GOVERNMENT	CAT1	2	6	0
3	2	22	2010	1	65	SRN	2	6	3					1	1	Cat IV	2	2	2	9	NEGATIVE						1	DHRANGDRA	50	4	16.3265	175		NA	NA	55	53	0.5	0.7		0	0	2	2008	GOVERNMENT	HRZE,CAT2	2	11	0
3	2	23	2010	1	32	AMC	2	7	1	1	1	1	1			Cat IV	4	4	4	4	NEGATIVE						10	CENTRAL ZONE	35	3	12.1107	170		NA	NA			0.6			0	0				NA	2		0
3	2	24	2010	1	58	AMC	2	5	1	1	1	1	1			Cat IV	2	2	2	9	NEGATIVE						9	EAST ZONE	60	4	20.7612	170		NA	NA	59	51	0.4	1.1	1.1	0	4	2	2006	GOVERNMENT	HRZE,CAT2	2	14	0
3	2	25	2010	0	28	BAN	1	6	3					1	2	Cat IV	2	2	2	9	NEGATIVE						5	DTC PALANPUR	55	4	22.6003	156		NA	NA	57	55	0.7	0.9		0	6	1	2009	GOVERNMENT	CAT1	2	6	0
3	2	26	2010	1	50	AMC	2	6	3					1	2	Cat IV	2	2	2	9	NEGATIVE						3	EAST ZONE	38	3	14.1285	164		NA	CS STOP	38	38	0.7	0.7	1	0	0	2	1999	GOVERNMENT	HRZE,CAT2	2	14	0
3	2	27	2010	1	40	AMC	2	7	1	1	1	1	1			Cat IV	1	2	1	9	NEGATIVE						10	EAST ZONE	45	4	16.7311	164	2/22/2010	SGPT HIGH,VOMITTING & ETCHING	KM & ETHIO STOP	42	44	0.7	0.9	0.8	23	1	6	2002	PRIVATE	HRZE,CAT2 THRICE,ND,HRZE	1	34	0
3	2	28	2010	1	40	SRN	2	6	1	1	1	1	1			Cat IV	2	1	1	3	NEGATIVE						2	DTC SURENDRANAGAR	38	3	15.0311	159		NA	NA	40	44	0.7	0.7	0.6	0	19	2	2009	GOVERNMENT	CAT1,CAT2	2	11	0
3	2	29	2010	1	60	AMC	2	7	3					1	1	Cat IV	2	2	2	9	NEGATIVE						9	WEST ZONE	52	4	19.8141	162		NA	NA	55	57	0.9	0.9	0.8	0	65	2	2009	GOVERNMENT	HRZE,CAT2	2	10	0
3	2	30	2010	1	32	AMC	2	5	3					1	1	Cat IV	1	1	1	9	NEGATIVE						10	NORTH CENTRAL	40	3	14.1723	168		NA	NA	43	44	0.7			0	0	2	2008	GOVERNMENT	CAT1,CAT2	2	10	0
3	2	31	2010	1	25	AMC	2	7	3					1	1	Cat IV	2	2	2	9	NEGATIVE						10	NORTH CENTRAL	54	4	19.1327	168		NA	NA	60	62	0.9			0	0	2	2009	PRIVATE	CAT2,HRZE	2	15	0
3	2	32	2010	1	45	AMC	2	7	3					1	1	Cat IV	2	1	1	9	NEGATIVE						10	CENTRAL ZONE	46	4	15.917	170		NA	NA	46	46	0.6			41	67	2	2001	GOVERNMENT	HRZE,CAT2	2	11	0
3	2	33	2010	1	35	AMC	2	7	3					1	1	Cat IV	2	2	2	9	NEGATIVE						10	AMRAIWADI	35	3	13.5026	161		NA	NA	37	40	0.7	0.6		6	6	2	2008	GOVERNMENT	HRZE,CAT2	2	10	0
3	2	34	2010	1	52	AMC	1	1	3					1	1	Cat IV	4	4	4	4	NEGATIVE						4	EAST ZONE	44	3	16.7657	162		NA	NA			0.6	0.5		0	0	1	2009	GOVERNMENT	CAT1	2	6	1
3	2	35	2010	1	21	AMC	2	6	3					1	1	Cat IV	2	2	2	9	NEGATIVE						6	AMRAIWADI	40	3	21.3117	137		NA	NA	41	42	0.6	0.4		2	0	2	2008	GOVERNMENT	CAT2 TWICE	1	7	0
3	2	36	2010	0	35	AMC	2	7	3					1	1	Cat IV	1	1	1	9	NEGATIVE						9	EAST ZONE	33	2	12.5743	162		NA	NA	36	31	0.6	0.7	0.7	2	0	3	2001	PRIVATE	CAT 3,AKT IV TWISE	2	21	0
3	2	37	2010	1	30	AMC	2	6	3					1	1	Cat IV	3	3	3	3	NEGATIVE						10	SCL HOSPITAL	40	3	14.1723	168		NA	NA			0.6			0	0	2	2009	GOVERNMENT	CAT 1,CAT 2	2	11	0
3	2	38	2010	1	32	KDA	2	7	3					1	1	Cat IV	2	1	9	9	NEGATIVE						9	NADIAD	39	3	14.6788	163		NA	NA	35	35	0.6	0.9	0.7	200	0	3	2008	GOVERNMENT	CAT III, CAT2 TWICE	1	16	0
3	2	39	2010	0	34	AMC	2	7	1	1	1	1	1			Cat IV	1	1	1	9	NEGATIVE						10	NORTH CENTRAL	40	3	18.2615	148		NA	NA	40	40	0.4			0	0	2	1988	GOVERNMENT	HRZE,CAT2	2	14	0
3	2	40	2010	1	36	AMC	2	6	3					1	1	Cat IV	2	2	2	9	NEGATIVE						10	AMRAIWADI	59	4	18.4139	179		NA	NA	66	67	0.5			0	0	7	1999	GOVERNMENT	HRZE,ND THRICE CAT2 TWICE	1	22	0
3	2	41	2010	1	25	BAN	2	5	1	1	1	2	1			Cat IV	1	9	1	9	NEGATIVE						5	DTC PALANPUR	50	4	17.7154	168		NA	NA	55	52	0.9			0	0	4	2006	PRIVATE	HRZE,CAT2,HRZE	2	29	0
3	2	42	2010	1	50	KDA	5	8	3					1	1	Cat IV	1	1	1	9	NEGATIVE						9	NADIAD	34	2	14.7161	152		NA	NA	32	33	0.7	0.7		122	0	1	2010	GOVERNMENT	CAT1	2	3	0
3	2	43	2010	1	32	PAT	2	7	3					1	1	Cat IV	4	4	4	4	NEGATIVE						5	DTC PATAN	55	4	19.721	167		NA	NA			0.8	0.9		23	0	2	2009	GOVERNMENT	HRZE,CAT2	2	7	0
3	2	44	2010	1	9	RJT	2	7	1	1	1	1	1			Cat IV	2	2	2	9	NEGATIVE						9	DTC RAJKOT	22	1	12.2522	134		NA	NA	24	24	0.6	0.6	0.6	6	2	4	2008	GOVERNMENT	CAT1 TWICE,CAT2 TWICE	1	15	0
3	2	45	2010	0	31	RJT	2	6	1	1	1	2	1			Cat IV	2	2	2	9	NEGATIVE						9	DTC RAJKOT	45	4	18.7305	155		NA	NA	49	52	0.1	0.7	0.6	4	0	4	2008	GOVERNMENT	CAT1,CAT2 TWICE,HRZE+LIVO	1	24	0
3	2	46	2010	1	31	AMC	1	6	3					1	2	Cat IV	1	1	1	9	POSITIVE						10	CHANDLODIA	47	4	16.6525	168		NA	NA	47	48	0.3			91	79	1	2009	GOVERNMENT	CAT1	2	5	0
3	2	47	2010	0	28	AMC	6	6	1	1	1	1	1			Cat IV	1	3	3	3	NEGATIVE						10	NORTH CENTRAL	43	3	16.3847	162		NA	NA	42		0.5			0	0	2	2008	GOVERNMENT	HR+OFLOX+ND1	2	18	0
3	2	48	2010	0	19	GNR	1	6	3					1	1	Cat IV	2	1	3	3	NEGATIVE						3	MEMNAGAR	40	3	15.2416	162		NA	NA	40		0.8	0.7		21	0	2	2009	GOVERNMENT	CAT1,CAT2	2	5	0
3	2	49	2010	1	34	AMC	2	7	3					1	1	Cat IV	1	1	1	9	NEGATIVE						10	SCL HOSPITAL	47	4	16.6525	168		NA	NA	50	43	0.4		0.7	84	20	2	2009	GOVERNMENT	HRZE,CAT2	2	12	0
3	2	50	2010	0	18	AMC	1	6	3					1	1	Cat IV	2	2	2	9	NEGATIVE						10	EAST ZONE	30	2	13.5129	149		NA	NA	30	33	0.4	0.6	0.6	0	9	1	2009	GOVERNMENT	CAT1	2	5	0
3	2	51	2010	1	50	KDA	2	5	3					1	2	Cat IV	1	1	1	9	NEGATIVE						5	NADIAD	40	3	14.1723	168	2010-12-10	ITCHING WHOLE BODY	KM STOP	40	43	0.9	0.8	0.5	15	23	2	1996	PRIVATE	HRZE,CAT2	2	18	0
3	2	52	2010	1	40	SBK	2	6	3					1	2	Cat IV	9	2	2	9	NEGATIVE						4	DHANSURA	47	4	16.6525	168		NA	NA	47	49	0.9	0.1	0.8	2	1	3	2007	GOVERNMENT	CAT1,CAT2 TWICE	1	18	0
3	2	53	2010	1	80	GNR	2	5	3					1	1	Cat IV	4	4	4	4	NEGATIVE						5	DTC GANDHINAGAR	52	4	18.424	168		NA	NA			0.9			0	0	2	2009	GOVERNMENT	CAT1,CAT2	2	10	1
3	2	54	2010	1	52	AMC	2	6	3					1	2	Cat IV	2	2	3	3	NEGATIVE						10	AMRAIWADI	66	5	24.539	164		NA	NA	66	65	0.6			25	13	4	2001	GOVERNMENT	CAT1,HRZE,CAT2 TWICE	1	16	0
3	2	55	2010	1	46	PAT	2	5	3					1	1	Cat IV	4	4	4	4	NEGATIVE						5	DTC PATAN	35	3	12.4008	168		NA	NA	35		0.8			0	0	3	2007	GOVERNMENT	CAT1,CAT2 TWICE	1	18	0
3	2	56	2010	1	34	AND	2	7	3					1	1	Cat IV	2	1	2	9	NEGATIVE						9	DTC PETLAD	36	3	13.3849	164		NA	NA	39	40	0.7			61	200	2	2007	GOVERNMENT	CAT1,CAT2	2	16	0
3	2	57	2010	1	28	AMC	2	6	3					1	1	Cat IV	1	1	1	9	NEGATIVE						9	MEMNAGAR	40	3	14.8721	164		NA	NA	51	52	0.7	0.6	0.9	0	7	2	2009	PRIVATE	CAT1,HRZE	2	22	0
3	2	58	2010	1	27	AMC	2	5	3					1	1	Cat IV	2	2	2	9	NEGATIVE						6	EAST ZONE	55	4	19.487	168		NA	NA	59	56	0.4	0.9	0.9	17	0	2	2005	GOVERNMENT	CAT1,CAT2	2	10	0
3	2	59	2010	1	30	AMC	1	1	3					1		Cat IV	4	4	4	4	NEGATIVE						9	EAST ZONE	59	4	19.9432	172		NA	NA	59		0.7	0.9		0	0	1	2009	GOVERNMENT	CAT1	2	5	0
3	2	60	2010	0	20	AMC	1	6	3					1	1	Cat IV	2	1	2	9	NEGATIVE						10	CENTRAL ZONE	34	2	14.7161	152		NA	NA	34	35	0.8			0	0	1	2009	GOVERNMENT	CAT1	2	5	0
3	2	61	2010	1	19	BAN	2	5	3					1	1	Cat IV	9	2	3	3	NEGATIVE						1	DEESA	40	3	14.8721	164		NA	NA	40	42	0.5			0	0	2	2007	GOVERNMENT	CAT3,CAT2	2	14	0
3	2	62	2010	1	44	AMC	1	1	3					1	1	Cat IV	2	2	9	9	NEGATIVE						10	EAST ZONE	51	4	18.9619	164		NA	NA	52	50	0.7	1.2	1.2	6	59	1	2009	GOVERNMENT	CAT1	2	5	0
3	2	63	2010	0	32	AMC	2	7	3					1	1	Cat IV	1	1	1	9	NEGATIVE						10	CENTRAL ZONE	35	3	15.9788	148		NA	NA	35	35	0.8			0	0	2	2007	GOVERNMENT	HRZE,CAT2	2	10	0
3	2	64	2010	0	44	AMC	2	5	3					1	1	Cat IV	2	2	2	9	NEGATIVE						4	EAST ZONE	60	4	22.3081	164		NA	NA	62	65	0.6	0.9	0.7	1	0	2	2006	GOVERNMENT	CAT1,CAT2	2	11	0
3	2	65	2010	0	16	BAN	2	7	3					1	1	Cat IV	1	1	1	9	NEGATIVE						1	DEESA	38	3	16.4474	152		NA	NA	40	44	0.7			0	0	2	2009	GOVERNMENT	CAT1,CAT2	2	9	0
3	2	66	2010	0	33	AMC	2	7	3					1	1	Cat IV	2	2	2	9	NEGATIVE						10	CHANDLODIA	33	2	15.0657	148		NA	NA	40	45	0.6			0	1	3	2007	PRIVATE	CAT1,CAT2,HRZE	2	25	0
3	2	67	2010	0	35	AMC	2	6	3					1	1	Cat IV	4	4	4	4	NEGATIVE						9	LGH HOSPITAL	60	4	25.2994	154		NA	NA			0.7	0.8		0	0	3	2006	GOVERNMENT	CAT1,CAT2 TWICE	1	18	0
3	2	68	2010	1	35	AMC	2	7	3					1	1	Cat IV	1	1	3	3	NEGATIVE						10	SCL HOSPITAL	44	3	15.5896	168		NA	NA	49	45	0.8	0.8		17	90	2	2006	GOVERNMENT	CAT 1,CAT 2	2	7	0
3	2	69	2010	1	15	AMC	2	5	3					1	1	Cat IV	2	2	2	9	NEGATIVE						10	SOUTH ZONE	40	3	15.8222	159		NA	NA	40	40	0.6			0	0	3	2008	GOVERNMENT	CAT1,CAT2 TWICE	1	24	0
3	2	70	2010	1	18	AMC	2	7	3					1	1	Cat IV	2	2	2	9	NEGATIVE						10	NORTH CENTRAL	47	4	16.263	170		NA	NA	49	49	0.6			0	0	2	2009	GOVERNMENT	HRZE,CAT2	2	10	0
3	2	71	2010	0	40	AMC	2	5	3					1	2	Cat IV	2	2	2	9	NEGATIVE						10	EAST ZONE	36	3	15.5817	152		NA	NA	37	41	0.6	0.6	0.6	0	0	3	2007	GOVERNMENT	HRZE,CAT2 TWICE	1	15	0
3	2	72	2010	1	42	BAN	2	5	3					1	2	Cat IV	2	3	3	3	NEGATIVE						5	DEESA	42	3	14.881	168		NA	NA	45		0.7			4	0	3	2004	GOVERNMENT	CAT1,CAT2 TWICE	1	19	0
3	2	73	2010	1	30	AMC	2	7	3					1	1	Cat IV	1	1	3	3	NEGATIVE						10	SOUTH ZONE	35	3	13.0131	164		NA	NA	35	35	0.6	0.9	0.9	200	0				NA	2		0
3	2	74	2010	0	19	AMC	1	6	3					1	1	Cat IV	2	2	2	9	NEGATIVE						10	NORTH CENTRAL	40	3	17.7778	150		NA	NA	45	45	0.7			0	0	1	2009	GOVERNMENT	CAT1	2	6	0
3	2	75	2010	1	18	AMC	2	7	3					1	1	Cat IV	2	2	2	4	NEGATIVE						4	LGH HOSPITAL	50	4	34.7222	120		NA	NA	55	55	0.8	0.7		106	0	2	2009	GOVERNMENT	HRZE,CAT2	2	17	0
3	2	76	2010	1	50	SBK	2	6	3					1	1	Cat IV	2	2	2	9	NEGATIVE						9	BHILODA	35	3	12.4008	168	2010-04-08	S.C HIGH	KM STOP	35	36	0.6			18	0	2	2009	GOVERNMENT	CAT1,CAT2	2	10	0
3	2	77	2010	0	22	AND	1	6	1	1	1	2	1			Cat IV	1	2	2	9	NEGATIVE						9	SARSA	34	2	14.7161	152		NA	NA	39	41	0.7	0.7	0.8	13	0	2	2008	GOVERNMENT	CAT1,CAT2	2	11	0
3	2	78	2010	0	51	SBK	2	6	3					1	1	Cat IV	1	1	1	9	NEGATIVE						9	DTC HIMMATNAGAR	36	3	15.5817	152		NA	NA	37	39	0.5	0.7	0.7	0	0	3	2006	GOVERNMENT	CAT1,CAT2 TWICE	1	22	0
3	2	79	2010	1	18	AMC	1	1	1	1	1	2	1			Cat IV	4	4	4	4	NEGATIVE						10	SOUTH ZONE	47	4	19.0677	157		NA	NA			0.7			0	0	1	2009	GOVERNMENT	CAT1	2	7	1
3	2	80	2010	1	42	KDA	6	6	3					1	2	Cat IV	9	1	1	9	NEGATIVE						2	KATHLAL	40	3	14.1723	168	10/25/2011	OFX RESISTANT	OFX STOP	43	43	1.2	1.2	0.9	0	3	4	2001	GOVERNMENT	CAT1,CAT2 TWICE,ND TWICE	1	34	0
3	2	81	2010	0	40	KDA	2	6	3					1	1	Cat IV	1	1	2	9	NEGATIVE						9	KATHLAL	30	2	13.6961	148		NA	NA	31	35	0.5	0.5	1	0	3	3	2006	GOVERNMENT	CAT1,CAT2 TWICE	1	15	0
3	2	82	2010	1	40	BAN	2	6	1	1	1	1	1			Cat IV	2	2	1	9	NEGATIVE						5	DANTA	50	4	19.5313	160		NA	NA	52	53	0.7			0	60	3	2008	PRIVATE	CAT1,CAT2,HRZE	2	16	0
3	2	83	2010	0	25	AMC	2	7	1	1	2	2	2			Cat IV	2	2	2	9	NEGATIVE						10	NORTH CENTRAL	69	5	29.0943	154		NA	NA	66	66	0.6			0	0	2	2007	GOVERNMENT	HRZE,CAT2	2	18	0
3	2	84	2010	1	25	BAN	2	7	3					1	1	Cat IV	1	1	9	9	NEGATIVE						5	DTC PALANPUR	44	3	16.3593	164		NA	NA	45		0.8			0	155	5	2006	GOVERNMENT	HRZE,CAT2	2	35	0
3	2	85	2010	1	50	KDA	2	5	3					1	2	Cat IV	2	2	2	9	NEGATIVE						5	NADIAD	48	4	16.8061	169		NA	NA	52	55	0.6	1	0.8	14	15	3	2005	GOVERNMENT	CAT1,CAT2 TWICE	1	14	0
3	2	86	2010	1	50	KDA	2	6	3					1	1	Cat IV	2	2	1	9	NEGATIVE						9	NADIAD	39	3	15.0457	161		NA	NA	43	47	0.6	0.7	1.2	27	62	2	2009	GOVERNMENT	CAT1,CAT2	2	12	0
3	2	87	2010	1	34	AMC	2	6	1	1	1	1	1			Cat IV	4	4	4	4	NEGATIVE						5	SCL HOSPITAL	42	3	15.6157	164		NA	NA			0.6			0	0	2	2008	GOVERNMENT	HRZE,CAT2	2	10	0
3	2	88	2010	1	35	SBK	2	6	1	1	1	1	1			Cat IV	2	1	9	9	NEGATIVE	12month culture report conta					9	DTC HIMMATNAGAR	40	3	15.2416	162		NA	NA	42	41	0.6	0.8		37	7	2	2008	GOVERNMENT	CAT1,CAT2	2	14	0
3	2	89	2010	1	47	AMC	6	6	3					1	1	Cat IV	1	2	3	3	NEGATIVE						10	AMRAIWADI	35	3	13.0131	164		NA	NA	35	35	0.5	0.7		14	6	5	1986	GOVERNMENT	CAT1,CAT2 TWICE,HRZE,ND	1	31	0
3	2	90	2010	1	35	SBK	2	6	3					1	1	Cat IV	1	1	3	3	NEGATIVE						5	DTC HIMMATNAGAR	40	3	14.8721	164		NA	NA	42	38	0.9	0.7		80	0	3	2006	GOVERNMENT	HRZE,CAT2 TWICE	1	22	0
3	2	91	2010	1	39	AMD	1	6	1	1	1	2	2			Cat IV	2	2	2	9	NEGATIVE						2	BAVLA	39	3	14.153	166		NA	NA	45	42	0.8			5	0	1	2009	GOVERNMENT	CAT1	2	7	0
3	2	92	2010	0	45	AMC	2	7	1	1	1	1	1			Cat IV	1	1	3	3	NEGATIVE						10	SCL HOSPITAL	26	2	11.5556	150		NA	NA	25		0.7	0.7		0	0	2	2009	GOVERNMENT	HRZE,CAT2	2	10	0
3	2	93	2010	1	38	SBK	2	6	3					1	1	Cat IV	9	1	3	3	NEGATIVE	4th month culture report conta					1	IDAR	63	4	19.2302	181		NA	NA	65	63	0.8	0.7		200	0	2	2006	GOVERNMENT	HRZE,CAT2	2	10	0
3	2	94	2010	1	45	AMC	2	5	1	1	1	1	2			Cat IV	2	2	2	9	NEGATIVE						9	CHANDLODIA	44	3	15.5896	168		NA	NA	50	55	0.6		1	0	0	2	2008	GOVERNMENT	CAT1,CAT2	2	10	1
3	2	95	2010	1	60	MSN	2	5	3					1	2	Cat IV	2	1	1	9	NEGATIVE						2	DTC MEHSANA	26	2	13.2653	140		NA	NA	28	30	0.6		0.7	10	30	3	2006	GOVERNMENT	CAT1,CAT2 TWICE	1	18	0
3	2	96	2010	1	27	BAN	2	6	3					1	2	Cat IV	2	2	2	9	NEGATIVE						9	DEESA	50	4	15.605	179		NA	NA	51	53	0.9			0	0	2	2004	GOVERNMENT	HRZE,CAT2	2	18	0
3	2	97	2010	1	39	AMC	2	7	3					1	1	Cat IV	2	2	2	9	NEGATIVE						9	CENTRAL ZONE	40	3	14.8721	164		NA	NA	42	42	0.7			30	200	2	1995	GOVERNMENT	NTP,CAT2 TWICE, ND	1	10	0
3	2	98	2010	1	36	PAT	2	5	3					1	1	Cat IV	2	1	2	9	NEGATIVE						2	CHANSMA	40	3	14.8721	164		NA	NA	43	45	0.6	0.9		10	90	3	2005	GOVERNMENT	HRZE,CAT2 TWICE	1	14	0
3	2	99	2010	1	29	AMC	1	1	3					1	1	Cat IV	2	4	4	4	NEGATIVE						10	EAST ZONE	49	4	18.2183	164		NA	NA	49		0.6	0.7		60	0	1	2009	GOVERNMENT	CAT1	2	5	0
3	2	100	2010	1	22	AMC	1	1	3					1	1	Cat IV	2	2	2	9	NEGATIVE						10	NORTH CENTRAL	40	3	14.1723	168		NA	NA	41	41	0.9			0	0	1	2009	GOVERNMENT	CAT1	2		0
3	2	101	2010	0	25	GNR	2	5	3					1	2	Cat IV	2	2	2	9	NEGATIVE						1	DTC GANDHINAGAR	44	3	16.9747	161		NA	NA	47	46	0.6	0.9	1.1	6	0	2	2008	GOVERNMENT	CAT1	2	5	0
3	2	102	2010	1	24	AMC	8	9	3					1	1	Cat IV	2	2	2	9	NEGATIVE						9	SCL HOSPITAL	45	4	16.1354	167		NA	NA	53	55	0.6	0.8	0.9	0	0	1	2008	PRIVATE	HRZE	2	24	0
3	2	103	2010	1	20	AMC	5	8	3					1	1	Cat IV	2	4	4	4	NEGATIVE						9	EAST ZONE	42	3	14.881	168		NA	NA	44		0.6	0.8	0.8	21	0	0			CONTACT PERSONE	2		0
3	2	104	2010	1	21	AMD	2	7	3					1	1	Cat IV	2	1	1	9	NEGATIVE						2	BAVLA	42	3	16.4063	160		NA	NA	49	46	0.6			0	0	2	2008	GOVERNMENT	HRZE,CAT2	2	7	0
3	2	105	2010	1	35	BAN	2	6	3					1	1	Cat IV	1	1	1	9	NEGATIVE						5	DHANERA	47	4	15.5238	174		NA	NA	50	51	0.7			0	0	3	2006	GOVERNMENT	HRZE,CAT2 TWICE	1	40	0
3	2	106	2010	1	30	MSN	1	6	3					1	2	Cat IV	2	2	2	9	NEGATIVE						9	DTC MEHSANA	25	2	10.8206	152		NA	NA	28	29	0.4	0.9	0.5	4	45	1	2009	GOVERNMENT	CAT1	2	5	0
3	2	107	2010	1	50	SBK	2	6	3					1	1	Cat IV	3	3	3	3	NEGATIVE						3	MEGHRAJ	55	4	18.1662	174		NA	NA			0.7			0	0	2	2009	GOVERNMENT	CAT2 TWICE	1	10	0
3	2	108	2010	1	18	AMD	2	5	3					1	1	Cat IV	9	1	1	9	NEGATIVE	4th month culture report conta					1	VIRAMGAM	42	3	16.0037	162		NA	NA	41		0.9			0	20	2	2008	GOVERNMENT	CAT1,CAT2	2	14	0
3	2	109	2010	0	20	BVN	2	5	3					1	1	Cat IV	2	2	2	9	NEGATIVE						9	DTC BHAVNAGAR	33	2	13.0533	159		NA	NA	36	35	0.7		0.7	62	69	2	2008	GOVERNMENT	HRZE,CAT2	2	15	0
3	2	110	2010	1	50	AMD	2	5	3					1	2	Cat IV	2	4	4	4	NEGATIVE						2	DHANDHUKA	41	3	14.5266	168		NA	NA			0.7			10	0	3	2007	GOVERNMENT	CAT1,CAT2 TWICE	1	18	0
3	2	111	2010	1	45	AMC	2	7	3					1	1	Cat IV	2	2	2	9	NEGATIVE						9	SCL HOSPITAL	35	3	13.0131	164	2011-08-06	NA	CS STOP	41	41	0.6	0.6	0.5	0	0	4	2007	GOVERNMENT	CAT1,CAT2 TWICE,CAT IV	1	33	0
3	2	112	2010	1	45	SBK	2	6	3					1	2	Cat IV	2	2	2	9	NEGATIVE						9	DHANSURA	45	4	18.4911	156		NA	NA	46	48	0.8	1.1		0	0	1	2007	GOVERNMENT	NON DOTS+LIVO+ETHIO+PASS	2	7	0
3	2	113	2010	1	36	AMC	2	7	1	1	1	1	1			Cat IV	9	9	1	9	NEGATIVE						10	EAST ZONE	36	3	13.5496	163		NA	NA	36	38	0.5	0.6		28	0				NA	2		0
3	2	114	2010	1	35	BAN	2	5	3					1	1	Cat IV	2	2	2	9	NEGATIVE						2	THARAD	44	3	19.5556	150		NA	NA	51		0.6			0	0	2	2009	GOVERNMENT	HRZE,CAT2	2	13	0
3	2	115	2010	0	35	AND	2	5	3					1	2	Cat IV	2	2	2	9	NEGATIVE						5	SARSA	40	3	15.625	160		NA	NA	49	53	0.8	0.8	0.8	0	0	2	2001	GOVERNMENT	HRZE,CAT2	2	10	0
3	2	116	2010	1	20	AMC	1	8	3					1	1	Cat IV	2	2	2	9	NEGATIVE						10	NORTH CENTRAL	39	3	14.5003	164		NA	NA	42	44	0.5			0	0	0			MDR CONTACT	2		0
3	2	117	2010	1	26	AMC	2	5	3					1	1	Cat IV	1	1	1	3	NEGATIVE						10	EAST ZONE	39	3	14.5003	164		NA	CS STOP	39	37	0.8	0.8	0.5	0	0	3	2008	GOVERNMENT	AKT IV TWISE,CAT 2	1	15	0
3	2	118	2010	0	65	KDA	1	6	3					1	1	Cat IV	2	1	3	3	NEGATIVE						2	BALASINOR	30	2	15.3061	140		NA	NA	28	25	0.4	1.3	0.9	20	8	2	2009	GOVERNMENT	CAT1,CAT2	2	10	0
3	2	119	2010	0	40	AND	2	5	3					1	1	Cat IV	1	2	1	9	NEGATIVE						9	SARSA	36	3	13.2231	165		NA	NA	39	43	0.7	0.7	0.7	3	5	4	2006	GOVERNMENT	CAT1,CAT2 THRICE	1	29	0
3	2	120	2010	1	32	SBK	2	6	3					1	1	Cat IV	3	3	3	3	NEGATIVE						2	BHILODA	40	3	13.8408	170		NA	NA			0.6	0.8		0	0	3	2006	GOVERNMENT	HRZE,CAT2 TWICE	1	17	0
3	2	121	2010	1	25	AND	2	5	3					1	1	Cat IV	4	4	4	4	NEGATIVE						9	SARSA	50	4	18.8189	163		NA	NA			0.8			0	0	4	2002	GOVERNMENT	CAT1,CAT2 THRICE	1	30	0
3	2	122	2010	1	50	MSN	2	6	3					1	1	Cat IV	1	1	2	9	NEGATIVE						9	KADI	42	3	14.881	168		NA	NA	50	53	0.8	0.9	1.4	0	0	2	2008	GOVERNMENT	HRE,CAT2	2	14	0
3	2	123	2010	1	29	GNR	1	6	3					1	1	Cat IV	2	2	9	9	NEGATIVE	12th month culture report conta					4	DEHGAM	55	4	16.2453	184	9/20/2011	HEARING LOSS	KM STOP	62	60	0.9	0.9	1	0	130	2	2008	GOVERNMENT	CAT1,CAT2	2	14	0
3	2	124	2010	1	32	AMC	2	5	3					1	1	Cat IV	2	2	3	3	NEGATIVE						10	NORTH CENTRAL	29	2	12.228	154		NA	NA	33	35	0.5			0	0	3	2006	GOVERNMENT	HERZ,CAT2 TWICE	1	20	0
3	2	125	2010	1	50	SBK	2	6	3					1	1	Cat IV	2	2	3	3	NEGATIVE						1	IDAR	35	3	11.5603	174		NA	NA	33	39	0.1	0.1		0	0	3	2005	GOVERNMENT	HERZ,CAT2 TWICE	1	7	0
3	2	126	2010	0	25	AND	1	1	3					1	1	Cat IV	3	3	3	3	NEGATIVE						4	DTC PETLAD	40	3	17.7778	150		NA	NA	37		0.5			0	0	1	2009	GOVERNMENT	CAT1	2	6	0
3	2	127	2010	1	30	PAT	2	5	3					1	1	Cat IV	1	1	1	9	NEGATIVE						1	RADHANPUR	33	2	10.7755	175		NA	NA	33	33	0.8	0.8	1.5	1	8	2	2008	GOVERNMENT	CAT1,CAT2	2	15	0
3	2	128	2010	1	52	SRN	2	5	3					1	1	Cat IV	2	1	1	9	NEGATIVE						5	DTC SURENDRANAGAR	46	4	15.5489	172		NA	NA	49	47	0.7		0.5	105	0	2	2009	GOVERNMENT	CAT1,CAT2	2	15	0
3	2	129	2010	1	19	MSN	2	6	3					1	1	Cat IV	1	2	2	9	NEGATIVE						9	KADI	34	2	12.0465	168		NA	NA	39	44	0.8	0.9		0	0	3	2008	GOVERNMENT	HERZ,CAT2 TWICE	1	10	0
3	2	130	2010	1	28	AMC	1	1	3					1	1	Cat IV	2	2	2	9	NEGATIVE						9	LGH HOSPITAL	51	4	19.433	162		NA	NA	49	51	0.7	0.7	0.9	0	0	1	2009	GOVERNMENT	CAT1	2	6	0
3	2	131	2010	1	39	AMC	2	5	3					1	1	Cat IV	2	2	4	4	NEGATIVE						10	CENTRAL ZONE	36	3	16	150		NA	NA	36	36	0.6			0	0	2	2008	GOVERNMENT	CAT2 TWICE	1	13	0
3	2	132	2010	0	30	KDA	2	6	3					1	1	Cat IV	1	3	3	3	NEGATIVE						1	NADIAD	36	3	16	150		NA	NA	36	37	0.6	0.7	0.9	52	0	3	2008	GOVERNMENT	CAT1,CAT2 TWISE	1	21	0
3	2	133	2010	1	54	PAT	2	6	3					1		Cat IV	3	3	3	3	NEGATIVE						5	DTC PATAN	35	3	15.5556	150		NA	NA	37		1	0.9	0.9	0	0	2	2008	GOVERNMENT	CAT2 TWICE	1	14	0
3	2	134	2010	1	60	AMC	2	7	3					1	2	Cat IV	2	2	1	9	NEGATIVE		2012-12-01				9	MEMNAGAR	60	4	22.0386	165		NA	NA	59	58	0.8	0.7	0.9	100	90	3	2007	GOVERNMENT	CAT1,CAT2 TWICE	1	15	0
3	2	135	2010	1	23	BAN	2	7	3					1	1	Cat IV	2	2	2	9	NEGATIVE						2	DTC PALANPUR	38	3	14.1285	164		NA	NA	44		0.6		0.8	0	0	2	2009	GOVERNMENT	HERZ,CAT2 TWICE	1	11	0
3	2	136	2010	1	25	SRN	2	6	3					1	1	Cat IV	2	2	2	9	NEGATIVE						10	DTC SURENDRANAGAR	38	3	15.8169	155		NA	NA	45	46	0.7	0.5		0	0	2	2009	GOVERNMENT	CAT1,CAT2	2	11	0
3	2	137	2010	1	33	AND	2	6	1	1	2	2	1			Cat IV	2	2	2	9	NEGATIVE						5	DTC PETLAD	29	2	11.6167	158		NA	NA	34	34	1			0	38	2	2008	GOVERNMENT	HRE,CAT2	2	14	0
3	2	138	2010	1	24	AMC	2	5	3					1	1	Cat IV	2	2	1	9	NEGATIVE						9	MEMNAGAR	29	2	12.0708	155		NA	NA	31	35	0.6	0.7	0.6	0	0	3	2007	GOVERNMENT	CAT1,CAT2 TWICE	1	19	0
3	2	139	2010	1	38	AMC	2	7	3					1	1	Cat IV	2	1	2	9	NEGATIVE						10	SOUTH ZONE	39	3	15.8221	157		NA	PZ STOP	40	40	0.7			0	0	4	2003	GOVERNMENT	CAT1,CAT2 THRICE	1	30	0
3	2	140	2010	1	58	SRN	2	5	3					1	2	Cat IV	2	2	2	9	NEGATIVE						4	SAYLA	38	3	14.8438	160		NA	NA	41	42	1	0.6		0	0	2	2006	GOVERNMENT	CAT1,CAT2	2	11	0
3	2	141	2010	1	56	AMC	2	6	3					1	1	Cat IV	2	2	1	9	POSITIVE						9	LGH HOSPITAL	40	3	14.8721	164		NA	NA	34	36	0.6	0.7	0.6	0	0	4	2007	GOVERNMENT	HERZ,CAT2 TWICE,ND	1	20	0
3	2	142	2010	1	37	BVN	2	5	1	1	1	1	1			Cat IV	1	2	2	9	NEGATIVE						2	TALAJA	31	2	11.5259	164		NA	NA	33	36	0.9	0.7	0.7	20	0	3	2005	GOVERNMENT	AKT4,CAT2 TWISE	1	17	0
3	2	143	2010	1	50	AMC	1	6	3					1	1	Cat IV	1	1	2	9	NEGATIVE						10	EAST ZONE	43	3	16.7969	160		NA	PZ STOP	44	44	0.7	1	0.8	0	0	1	2009	GOVERNMENT	CAT1	2	7	0
3	2	144	2010	1	33	AMC	2	6	3					1	1	Cat IV	9	2	1	9	NEGATIVE						10	SCL HOSPITAL	47	4	18.3594	160		NA	NA	50	53	0.7	0.6		0	0	3	1997	GOVERNMENT	HRZE,ND1,CAT 2	2	20	0
3	2	145	2010	1	55	SBK	1	1	3					1	1	Cat IV	1	1	1	9	NEGATIVE						1	DTC HIMMATNAGAR	38	3	13.4637	168		NA	NA	42	43	1	1		20	0	2	2009	GOVERNMENT	CAT1,CAT2	2	13	0
3	2	146	2010	0	18	AMC	2	7	3					1	1	Cat IV	1	1	1	9	NEGATIVE						9	LGH HOSPITAL	29	2	13.6048	146		NA	NA	30	27	0.6	0.7		0	0	2	2009	GOVERNMENT	HRZE,CAT 2	2	16	0
3	2	147	2010	0	35	AMC	2	7	3					1	2	Cat IV	2	2	3	3	NEGATIVE						5	AMRAIWADI	28	2	10.9375	160		NA	NA			0.6			0	0				NA	2		0
3	2	148	2010	0	30	AMC	2	7	3					1	1	Cat IV	2	1	1	9	NEGATIVE						4	SOUTH ZONE	35	3	15.5556	150		NA	NA	40	45	0.6			0	0	3	2008	GOVERNMENT	CAT1,HERZ,CAT2	2	19	0
3	2	149	2010	1	51	AMC	2	4	3					1	1	Cat IV	2	2	2	9	NEGATIVE						10	EAST ZONE	51	4	18.0697	168		NA	NA	51	50	0.7	1	0.9	1	6	2	1989	GOVERNMENT	NTP,CAT2 TWICE, ND	1	17	0
3	2	150	2010	0	26	AMC	2	5	3					1	1	Cat IV	1	1	3	3	NEGATIVE						9	SCL HOSPITAL	32	2	14.2222	150		NA	NA	30	29	0.8	0.6		91	60	4	2005	GOVERNMENT	CAT1,CAT2 THRICE	1	30	0
3	2	151	2010	0	42	AMC	2	1	3					1	1	Cat IV	2	9	1	9	NEGATIVE		2012-12-01				10	CENTRAL ZONE	38	3	16.8889	150		NA	NA	38	38	0.5			0	0	1	2009	GOVERNMENT	CAT 1	2	5	0
3	2	152	2010	1	35	KDA	2	6	3					1	1	Cat IV	1	1	2	9	POSITIVE						9	NADIAD	40	3	14.1723	168		NA	NA	33	30	0.6	0.7	1	28	55	3	2006	GOVERNMENT	CAT1,CAT2 TWISE	1	22	0
3	2	153	2010	0	45	AMC	2	5	3					1	1	Cat IV	2	2	2	9	NEGATIVE						10	CENTRAL ZONE	73	5	32.4444	150	11/22/2010	ADR	KM STOP	73	73	0.5			0	0	3	2007	GOVERNMENT	HRZE,CAT 2 TWICE	1	27	0
3	2	154	2010	1	40	SRN	2	6	1	1	1	1	1			Cat IV	9	2	1	9	NEGATIVE	4th month culture report conta					5	SAYLA	40	3	14.8721	164		NA	NA	32	33	0.7	0.5		0	0	4	2006	GOVERNMENT	CAT2 FOUR TIMES	2	32	0
3	2	156	2010	0	24	AMC	2	7	3					1	1	Cat IV	1	2	1	9	NEGATIVE						9	LGH HOSPITAL	41	3	16.4237	158		NA	NA	40	45	0.6	0.8	0.5	0	0	3	2007	GOVERNMENT	HRZE TWISE,CAT 2	1	23	0
3	2	157	2010	1	45	SBK	2	6	1	1	1	1	2			Cat IV	2	2	2	9	NEGATIVE						2	MEGHRAJ	52	4	18.424	168		NA	NA	52	52	0.8	1		0	8	3	2007	GOVERNMENT	CAT1,CAT2 TWISE	1	20	0
3	2	158	2010	0	35	AND	2	6	3					1	1	Cat IV	2	2	2	9	NEGATIVE						4	SARSA	35	3	14.0202	158		NA	NA	38	38	0.6	0.6	0.8	16	62	2	2008	GOVERNMENT	CAT1,CAT2	2	15	0
3	2	159	2010	0	30	AND	2	5	3					1	1	Cat IV	1	1	1	9	NEGATIVE						9	DTC PETLAD	34	2	15.1111	150	2010-04-10	ADR	KM STOP	34	34	0.8			200	0	2	2008	GOVERNMENT	CAT1,CAT2	2	13	0
3	2	160	2010	1	47	SRN	2	5	1	1	1	2	1			Cat IV	2	2	1	9	NEGATIVE						3	DHANGHARA	42	3	18.6667	150		NA	NA	45		0.9	0.6		19	94	2	2008	GOVERNMENT	CAT1,CAT2	2	11	0
3	2	161	2010	0	35	AMC	2	7	3					1	2	Cat IV	4	4	4	4	NEGATIVE						9	SOUTH ZONE	67	5	28.251	154	2010-09-08	ADR	KM STOP			0.7			0	0	2	2009	GOVERNMENT	AKT IV,CAT 2	2	13	0
3	2	162	2010	1	30	AMC	2	7	3					1	1	Cat IV	1	1	3	3	NEGATIVE						10	SOUTH ZONE	44	3	17.1875	160		NA	NA	48	41	0.5			0	0	2	2003	GOVERNMENT	CAT 3,CAT 2	2	15	0
3	2	163	2010	1	36	MSN	2	7	3					1	1	Cat IV	4	4	4	4	NEGATIVE						4	DTC MEHSANA	48	4	14.8148	180		NA	NA			0.7			0	0	2	2008	GOVERNMENT	HRZE,CAT2	2	6	0
3	2	164	2010	1	55	BAN	2	4	3					1	1	Cat IV	4	4	4	4	NEGATIVE						2	DTC PALANPUR	47	4	16.6525	168		NA	NA			0.7			0	0	2	2008	GOVERNMENT	CAT IV,CAT2	2	13	0
3	2	165	2010	1	30	BVN	2	6	1	1	1	1	1			Cat IV	1	1	1	9	NEGATIVE						3	PALITANA	39	3	13.818	168		NA	NA	42	41	0.6	1.1	0.7	0	0	4	2006	GOVERNMENT	CAT1,PVT,CAT2 TWISE	1	31	0
3	2	166	2010	1	35	BVN	2	5	1	1	1	1	1			Cat IV	1	1	2	9	NEGATIVE						5	BOTAD	36	3	12.1687	172		NA	NA	41	40	0.8		0.6	0	0	3	2005	GOVERNMENT	CAT2 THRICE	2	14	0
3	2	167	2010	1	28	AMC	5	9	3					1	1	Cat IV	2	2	2	9	NEGATIVE						9	MEMNAGAR	40	3	14.8721	164		NA	NA	41	44	0.6	0.6	0.9	0	0				NA	2		0
3	2	168	2010	1	42	SRN	2	5	3					1	2	Cat IV	2	2	1	9	NEGATIVE						10	DTC SURENDRANAGAR	55	4	21.2183	161		NA	NA	56	60	0.7	0.5	0.5	0	16	2	2010	GOVERNMENT	HRZE,CAT2	2	9	0
3	2	169	2010	1	39	RJT	2	6	1	1	1	1	2			Cat IV	2	2	2	9	NEGATIVE						9	DTC RAJKOT	42	3	14.881	168		NA	NA	45	46	0.6	0.8	0.8	0	1	3	2004	GOVERNMENT	CAT2 THRICE	2	26	0
3	2	170	2010	1	25	BAN	2	5	3					1	1	Cat IV	1	1	3	3	NEGATIVE						5	DTC PALANPUR	35	3	15.5556	150		NA	NA	32		0.7			68	0	2	2009	GOVERNMENT	HRZE,CAT2	2	10	0
3	2	171	2010	0	45	AML	2	6	1	1	1	2	1			Cat IV	2	2	2	9	NEGATIVE						4	SAVARKUNDALA	60	4	24.0346	158		NA	NA	65	70	0.5	0.8	0.7	0	0	3	2008	GOVERNMENT	CAT1,CAT2,ND2	2	21	0
3	2	172	2010	1	45	MSN	2	5	3					1	1	Cat IV	1	1	1	9	NEGATIVE						4	KHERALU	47	4	15.887	172		NA	NA	46	46	0.5		0.6	90	0	3	2004	GOVERNMENT	HRE,CAT2 TWISE	1	15	0
3	2	173	2010	1	20	AMC	2	5	3					1	1	Cat IV	2	2	2	9	NEGATIVE						10	SCL HOSPITAL	34	2	13.2813	160		NA	NA	41	45	0.5	0.8	0.9	5	0	2	2006	GOVERNMENT	CAT1,CAT2	2	11	0
3	2	174	2010	0	34	AMC	2	7	1	1	1	1	1			Cat IV	1	1	1	9	NEGATIVE						9	MANSA	35	3	15.1489	152		NA	NA	34	33	0.4	0.8	0.9	0	0				NA	2		0
3	2	175	2010	0	32	PAT	2	5	3					1	1	Cat IV	2	1	2	9	NEGATIVE						2	DTC PATAN	36	3	16	150		NA	NA	44	51	0.4	0.6		0	0				NA	2		0
3	2	176	2010	0	30	BVN	2	6	1	1	1	1	1			Cat IV	2	2	2	9	NEGATIVE						4	TALAJA	34	2	15.5223	148		NA	NA	37	37	0.4	0.5	0.6	8	0				NA	2		0
3	2	177	2010	1	50	AND	2	5	1	1	1	1	1			Cat IV	2	1	2	9	NEGATIVE						1	KHAMBHAT	45	4	22.9592	140	7/16/2010	ADR	CS STOP	45	45	0.6	1		16	28	2	2008	GOVERNMENT	CAT2 TWISE	1	14	0
3	2	178	2010	1	39	SBK	1	6	3					1	1	Cat IV	2	2	2	9	NEGATIVE						4	BHILODA	40	3	14.8721	164		NA	NA	39	44	0.6	0.7		0	13	1	2009	GOVERNMENT	HRZE	2	6	0
3	2	179	2010	1	50	KDA	2	5	3					1	2	Cat IV	2	2	2	9	NEGATIVE						2	KATHLAL	38	3	13.7901	166		NA	NA	44	45	0.9	0.8	0.6	1	0	2	2007	GOVERNMENT	CAT1,CAT2	2	14	0
3	2	180	2010	1	40	AMC	2	7	3					1	1	Cat IV	1	1	3	3	NEGATIVE						10	NORTH CENTRAL	40	3	14.8721	164		NA	NA	40	35	0.5			0	0	4	1994	GOVERNMENT	HRZE THRAISE,KM,CAT2	1	11	0
3	2	181	2010	1	40	AMC	8	9	3					1	1	Cat IV	3	3	3	3	NEGATIVE						4	LGH HOSPITAL	38	3	19.3878	140		NA	NA	38		0.7			0	0	2	2005	PRIVATE	CAT 1,HRZE	2	15	0
3	2	182	2010	1	50	SBK	2	6	3					1		Cat IV	2	2	2	9	NEGATIVE						4	BHILODA	50	4	17.7154	168		NA	NA	50	51	1	0.8		9	6	3	2001	GOVERNMENT	HRE,CAT2 TWISE	1	22	0
3	2	183	2010	1	62	AMC	2	7	3					1	1	Cat IV	2	2	2	9	NEGATIVE						10	CHANDLODIA	40	3	15.625	160		NA	NA	40	40	0.6			0	0	4	2005	GOVERNMENT	CAT2,AKT IV,CAT2,NDI	2	36	0
3	2	184	2010	1	25	BAN	2	5	3					1	1	Cat IV	1	1	9	9	NEGATIVE						5	DEODAR	36	3	12.6046	169		NA	NA	38	37	0.5			0	0	3	2007	GOVERNMENT	HRZ,CAT2 TWISE	1	17	0
3	2	185	2010	0	30	GNR	1	6	3					1	2	Cat IV	2	2	2	9	NEGATIVE						9	DEHGAM	35	3	15.7651	149		NA	NA	40	40	0.6	0.7	0.8	0	0	1	2009	GOVERNMENT	CAT1	2	6	0
3	2	186	2010	1	12	AMC	3	1	3					1	1	Cat IV	2	2	9	9	NEGATIVE						9	SOUTH ZONE	28	2	12.7831	148		NA	NA	27	36	0.6			0	0	1	2010	GOVERNMENT	CAT3	2	2	0
3	2	187	2010	1	55	SRN	2	5	3					1	1	Cat IV	4	4	4	4	NEGATIVE						10	DTC SURENDRANAGAR	56	4	19.3772	170		NA	NA	57					86	0	2	2009	GOVERNMENT	CAT1,CAT2	2	11	0
3	2	188	2010	1	26	SBK	2	6	1	1	1	2	1			Cat IV	2	2	2	9	NEGATIVE						4	BHILODA	30	2	10.1406	172		NA	NA	35	37	0.6			0	7	3	2005	GOVERNMENT	HRZES,CAT2 TWICE	1	18	0
3	2	189	2010	0	28	AMC	2	7	3					1	1	Cat IV	1	1	9	9	NEGATIVE						10	CENTRAL ZONE	45	4	16.5289	165		NA	NA	46	45	0.8			0	0	2	2009	GOVERNMENT	HRZE,CAT2	2	7	0
3	2	190	2010	1	46	AMC	2	7	3					1	1	Cat IV	4	4	4	4	NEGATIVE						10	CENTRAL ZONE	65	5	23.03	168		NA	NA			0.9			0	0				NA	2		0
3	2	191	2010	1	70	AMD	2	5	3					1	2	Cat IV	2	2	2	9	NEGATIVE						1	DHANDHUKA	51	4	20.9566	156		NA	KM STOP			0.6	0.9		0	66	3	2009	GOVERNMENT	AKT1,CAT2	2	12	0
3	2	192	2010	1	35	KDA	2	5	3					1	1	Cat IV	2	2	2	9	NEGATIVE						4	BALASINOR	53	4	18.3391	170		NA	NA	52	51	0.8	1.2	1.2	2	82	3	2007	GOVERNMENT	CAT3,CAT2 TWICE	1	18	0
3	2	193	2010	1	45	SRN	2	5	3					1	1	Cat IV	2	2	2	9	NEGATIVE						2	SAYLA	45	4	17.1468	162		NA	NA	49		0.6	0.5		14	0	3	2007	GOVERNMENT	HRZE,CAT2 TWISE	1	21	0
3	2	194	2010	1	33	BAN	2	5	3					1	1	Cat IV	2	2	2	9	NEGATIVE						1	DTC PALANPUR	39	3	15.6225	158		NA	NA	41	42	0.5	0.5		0	0	2	2007	GOVERNMENT	HRZE,CAT2	2	16	0
3	2	195	2010	1	37	BAN	2	5	3					1	1	Cat IV	2	2	2	9	NEGATIVE						5	DEESA	33	2	13.7357	155		NA	NA	35		0.5	0.7		0	0	2	2007	GOVERNMENT	HRZE,CAT2	2	14	0
3	2	196	2010	0	23	RJT	2	5	1	1	1	1	1			Cat IV	3	3	3	3	NEGATIVE						1	RAJKOT R	35	3	12.4008	168		NA	NA	35		0.5		0.7	55	0	6	2007	GOVERNMENT	AKT4,OFX,CAT2 FIVE TIME	1	32	0
3	2	197	2010	1	43	KDA	2	7	3					1	2	Cat IV	1	2	3	3	NEGATIVE						9	NADIAD	33	2	11.4187	170		NA	NA	33	33	0.7	0.7	0.7	108	0	2	2009	GOVERNMENT	HRZE,CAT2	2	7	0
3	2	198	2010	0	28	GNR	2	5	3					1	1	Cat IV	2	2	1	9	NEGATIVE						5	DEHGAM	29	2	13.7931	145		NA	CS STOP	35	40	0.5	0.6	0.6	17	4	5	2005	GOVERNMENT	AKT4 THRICE,CAT2 TWISE	1	41	0
3	2	199	2010	1	50	BVN	2	7	1	1	1	1	1			Cat IV	1	2	1	9	NEGATIVE						1	SHIHOR	45	4	16.7311	164		NA	NA	50		0.7	0.8	0.1	4	20				NA	2		0
3	2	200	2010	1	22	AMC	2	6	1	1	1	1	1			Cat IV	2	2	2	9	NEGATIVE						9	MEMNAGAR	49	4	17.9982	165		NA	NA	51	57	0.8	0.8	0.8	7	0				NA	2		0
3	2	201	2010	1	65	AMC	1	1	1	1	1	1	1			Cat IV	1	1	1	9	NEGATIVE						4	CHANDLODIA	38	3	14.4795	162		NA	NA	39	39	0.6			10	0	1	2009	GOVERNMENT	CAT1	2	5	0
3	2	202	2010	1	25	AND	1	5	3					1	2	Cat IV	9	1	3	3	NEGATIVE						5	KHAMBHAT	34	2	13.2813	160		NA	NA	35	35	0.5			0	0	4	2005	GOVERNMENT	CAT1,CAT2 THRICE	1	30	0
3	2	203	2010	0	16	AMD	1	1	3					1	2	Cat IV	2	2	2	9	NEGATIVE						2	DHANDHUKA	25	2	12.7551	140		NA	NA	26	30	0.5		0.5	0	0	1	2009	GOVERNMENT	CAT1	2	6	0
3	2	204	2010	1	32	AND	2	5	1	1	1	1	1			Cat IV	1	1	4	4	NEGATIVE						9	KHAMBHAT	40	3	15.625	160		NA	NA	42		0.6	0.7		56	0	3	2003	GOVERNMENT	CAT1,CAT2	2	19	0
3	2	205	2010	1	20	AMC	2	4	3					1	2	Cat IV	3	3	3	3	NEGATIVE						10	CENTRAL ZONE	32	2	12.5	160		NA	NA	32		0.8			62	0	5	2004	GOVERNMENT	CAT1,CAT2 FOUR TIME	1	35	0
3	2	206	2010	0	16	AMC	2	6	3					1	1	Cat IV	1	2	1	9	NEGATIVE						10	NORTH CENTRAL	26	2	13.2653	140		NA	NA	26	27	0.6	0.6	0.5	3	58	3	2008	GOVERNMENT	CAT 1,CAT 2 TWISE	1	17	0
3	2	207	2010	1	46	KDA	2	5	3					1	1	Cat IV	3	3	3	3	NEGATIVE						3	NADIAD	32	2	11.3379	168		NA	NA	30		0.5			57	0	5	2004	GOVERNMENT	CAT1,CAT2 FOUR TIME	1	35	0
3	2	208	2010	1	30	SRN	2	5	3					1	2	Cat IV	1	4	4	4	NEGATIVE						1	MULI	34	2	11.7647	170		NA	NA	41		1	0.4		44	0	4	2007	GOVERNMENT	CAT1,CAT2 THRICE	1	30	0
3	2	209	2010	1	35	SRN	2	6	3					1	1	Cat IV	3	3	3	3	NEGATIVE						5	MULI	41	3	13.8588	172		NA	NA			0.6			0	0	4	2006	PRIVATE	CAT1,CAT2 TWICE,HRZE	1	24	0
3	2	210	2010	1	57	BVN	2	5	1	1	1	2	1			Cat IV	2	9	9	9	NEGATIVE						10	DTC BHAVNAGAR	62	4	21.9671	168		NA	NA	62		1			54	0	4	2004	GOVERNMENT	CAT1,CAT2 THRICE	1	30	1
3	2	211	2010	1	45	AMC	2	5	3					1	1	Cat IV	1	3	3	3	NEGATIVE						4	SOUTH ZONE	42	3	15.2417	166		NA	NA	33	33	0.5	0.6		17	9	3	2003	GOVERNMENT	CAT1,CAT2 TWICE	1	23	0
3	2	212	2010	0	38	AMC	2	7	3					1	1	Cat IV	1	1	1	9	NEGATIVE						10	SCL HOSPITAL	65	5	27.4077	154		NA	NA	59	55	0.6	0.5	0.5	0	0	4	2006	PRIVATE	HRZE,CAT2,SHRZE TWICE	1	23	0
3	2	213	2010	1	28	AMC	1	1	3					1	1	Cat IV	2	2	2	9	NEGATIVE						10	SOUTH ZONE	46	4	18.4265	158		NA	NA	46	47	0.7	0.5		0	11	1	2010	GOVERNMENT	CAT1	2	5	0
3	2	214	2010	1	60	AMC	2	6	3					1	2	Cat IV	1	1	1	9	NEGATIVE						10	SCL HOSPITAL	51	4	17.6471	170		NA	NA	51	50	0.8	0.6		123	0	3	2004	GOVERNMENT	CAT1,CAT2 TWICE	1	22	0
3	2	215	2010	1	52	AMC	2	5	3					1	1	Cat IV	2	2	2	9	NEGATIVE						9	AMRAIWADI	52	4	19.1001	165		NA	NA	52	52	0.5			0	0	3	2008	GOVERNMENT	CAT1,CAT2 TWICE	1	17	1
3	2	216	2010	1	33	AMC	2	7	3					1	1	Cat IV	2	2	2	9	NEGATIVE						10	SCL HOSPITAL	40	3	13.8408	170		NA	NA	47	49	0.8	0.6		7	0	2	2000	GOVERNMENT	HRZE,CAT2	2	14	0
3	2	217	2010	0	35	AMC	2	5	3					1	1	Cat IV	2	2	2	9	NEGATIVE						10	SCL HOSPITAL	33	2	12.5743	162		NA	KM,CS STOP	34	35	0.9	0.5	0.8	0	12	2	2009	GOVERNMENT	CAT3,CAT2	2	10	0
3	2	218	2010	1	40	SBK	1	6	1	1	1	1	2			Cat IV	2	2	9	9	NEGATIVE						9	BHILODA	40	3	15.625	160		NA	NA	40	40	0.6	0.3		0	100	2	2008	GOVERNMENT	CAT1,CAT2	2	14	0
3	2	219	2010	0	17	AMC	2	5	3					1	1	Cat IV	3	3	3	3	NEGATIVE						10	SCL HOSPITAL	24	1	10.1198	154		NA	NA			0.5	0.5		17	0	1	2009	GOVERNMENT	CAT1	2	5	0
3	2	220	2010	1	28	AMC	2	5	3					1	1	Cat IV	1	1	1	9	NEGATIVE						9	SCL HOSPITAL	45	4	15.2109	172		NA	NA	52	52	0.5		0.6	1	0	3	2008	GOVERNMENT	CAT2 THRICE	2	24	0
3	2	221	2010	0	30	SBK	2	6	3					1	1	Cat IV	3	3	3	3	NEGATIVE						1	IDAR	32	2	14.6092	148		NA	NA	34		0.6			13	0	3	2008	GOVERNMENT	CAT1,OFX,CAT2	2	17	0
3	2	222	2010	0	17	AMC	2	7	3					1	1	Cat IV	2	1	2	9	NEGATIVE						10	EAST ZONE	28	2	12.1191	152		NA	NA	25	25	0.8	0.8	0.6	0	0	2	2009	GOVERNMENT	HRZE,CAT2	2	16	0
3	2	223	2010	1	58	AND	2	5	3					1	2	Cat IV	2	1	1	9	NEGATIVE						9	KHAMBHAT	72	5	26.7698	164		NA	NA	66	63	0.6			10	0	4	2002	GOVERNMENT	CAT2 THRICE	2	16	1
3	2	224	2010	1	32	AML	2	6	1	1	1	1	1			Cat IV	1	9	1	9	NEGATIVE						1	RAJULA	38	3	16.4474	152		NA	NA	41	43	0.8	1.1	1	71	72	3	2008	GOVERNMENT	CAT2 TWICE,ND2	1	22	1
3	2	225	2010	1	40	MSN	2	5	3					1	2	Cat IV	2	2	2	9	NEGATIVE						1	VISNAGAR	36	3	14.7929	156		NA	NA	36	36	0.7			0	9	2	2009	GOVERNMENT	HRZE,CAT2	2	13	0
3	2	226	2010	0	25	AND	2	7	3					1	1	Cat IV	2	2	2	9	NEGATIVE						9	KHAMBHAT	32	2	12.5	160		NA	NA	35	35	1	0.8	0.8	0	37	2	2006	GOVERNMENT	HRZE,CAT2	2	14	0
3	2	227	2010	0	75	MSN	2	4	3					1	1	Cat IV	2	2	2	9	NEGATIVE						1	DTC MEHSANA	30	2	12.487	155		NA	NA	31	38				0	0	2	2008	GOVERNMENT	CAT3,CAT2	2	14	0
3	2	228	2010	0	45	AND	2	5	3					1	1	Cat IV	2	2	2	9	NEGATIVE						5	DTC PETLAD	41	3	14.3552	169		NA	NA	45	44	0.6	0.6	0.7	22	53	2	2009	GOVERNMENT	CAT1,CAT2	2	10	0
3	2	229	2010	1	26	AMC	2	5	1	1	1	1	1			Cat IV	1	9	2	9	NEGATIVE						9	EAST ZONE	43	3	15.9875	164		NA	NA	44	43	0.7			11	2	5	2004	GOVERNMENT	HRZE,CAT2 FOUR	1	33	0
3	2	230	2010	0	64	SRN	3	6	3					1	1	Cat IV	2	2	2	9	NEGATIVE						3	MULI	40	3	17.0874	153		NA	NA	41		0.7	0.6		12	22	1	2010	GOVERNMENT	CAT3	2	6	0
3	2	231	2010	1	25	RJT	2	5	1	1	1	1	1			Cat IV	2	2	2	9	NEGATIVE						9	DTC RAJKOT	60	4	20.0474	173		NA	NA	59	60	0.5	0.8	0.8	0	0	3	2005	GOVERNMENT	CAT1,SHERZ,CAT2	2	23	0
3	2	232	2010	1	45	AND	2	4	3					1	1	Cat IV	2	2	2	9	NEGATIVE						9	SARSA	46	4	15.917	170		NA	NA	46	48	0.7	0.7	0.7	61	14	2	2006	GOVERNMENT	HRZE,CAT2	2	14	1
3	2	233	2010	0	28	KDA	1	6	3					1	1	Cat IV	1	2	1	9	NEGATIVE						9	NADIAD	23	1	10.5004	148		NA	NA	23	25	0.7	0.7	1	128	0	1	2009	GOVERNMENT	CAT1	2	5	0
3	2	234	2010	1	21	AML	2	5	1	1	1	1	1			Cat IV	4	4	4	4	NEGATIVE						5	DTC AMRELI	52	4	17.1753	174		NA	NA			0.6			0	0	3	2007	GOVERNMENT	CAT1,CAT2 TWICE	1	22	0
3	2	235	2010	1	40	KDA	2	7	1	1	1	1	1			Cat IV	2	2	2	9	NEGATIVE						9	NADIAD	50	4	21.0828	154	10/17/2011	ADR	CS STOP	53	55	0.8	1.1	0.6	2	9	2	2007	GOVERNMENT	SHERZ, CAT2	2	27	0
3	2	236	2010	1	58	AMC	2	5	1	1	1	1	1			Cat IV	2	2	2	9	NEGATIVE						10	EAST ZONE	44	3	16.7657	162		NA	NA	44	47	0.6	0.7	0.9	2	0	2	1977	GOVERNMENT	HERZ,CAT2	2	28	0
3	2	238	2010	0	35	AMD	1	6	3					1	1	Cat IV	2	2	2	9	NEGATIVE						2	DHANDHUKA	34	2	14.1519	155		NA	NA	37	38	0.6	0.5		0	0	1	2009	GOVERNMENT	CAT1	2	6	0
3	2	239	2010	1	28	AMC	2	7	3					1	1	Cat IV	2	2	2	9	NEGATIVE						9	CHANDLODIA	42	3	16.0037	162		NA	NA	45	45	0.8	0.8	0.8	14	0	2	2008	GOVERNMENT	HERZ,CAT2	2	14	0
3	2	240	2010	1	32	BVN	2	5	1	1	1	1	1			Cat IV	2	2	2	9	NEGATIVE						1	SHIHOR	40	3	13.5208	172		NA	NA	41	40	0.7		0.8	85	0	2	2008	GOVERNMENT	CAT1,CAT2	2	10	0
3	2	241	2010	1	45	SBK	3	6	3					1	2	Cat IV	2	2	2	9	NEGATIVE						1	DHANSURA	40	3	14.1723	168		NA	NA	44	45	0.6	0.8		0	0	1	2010	GOVERNMENT	CAT3	2	3	0
3	2	242	2010	1	22	AMC	2	7	3					1	1	Cat IV	1	1	1	9	NEGATIVE						10	AMRAIWADI	40	3	13.5208	172		NA	NA	45	46	0.7			3	0	2	2009	GOVERNMENT	CAT1,CAT2	2	13	0
3	2	243	2010	1	40	SBK	2	6	3					1	1	Cat IV	1	1	9	9	NEGATIVE						5	DTC HIMMATNAGAR	42	3	16.4063	160	9/15/2011	S.C.B.U HIGH	KM STOP	46	44	0.7		2	200	0	3	2007	GOVERNMENT	CAT1,CAT2 TWICE	1	22	0
3	2	244	2010	1	52	PAT	2	5	3					1	1	Cat IV	3	3	3	3	NEGATIVE						5	CHANSMA	42	3	13.7143	175		NA	NA			0.6			0	0	3	2008	GOVERNMENT	HERZ,CAT2 TWICE	1	18	0
3	2	245	2010	1	21	AML	2	5	1	1	2	1	1			Cat IV	2	2	2	9	NEGATIVE						9	BABRA	43	3	15.2353	168		NA	NA	47	48	0.7	1.2	1	0	13	3	2006	GOVERNMENT	CAT1,CAT2 TWICE	1	20	0
3	2	246	2010	0	30	AMC	2	6	3					1	1	Cat IV	2	2	2	9	NEGATIVE						10	SOUTH ZONE	50	4	20.8117	155		NA	NA	52	54	0.5	0.5		5	2	3	2008	GOVERNMENT	HERZ,CAT2	2	19	0
3	2	247	2010	1	62	SBK	2	6	3					1	2	Cat IV	4	4	4	4	NEGATIVE						5	DTC HIMMATNAGAR	45	4	18.026	158		NA	NA			1			0	0	2	2009	GOVERNMENT	CAT2 TWICE	1	16	0
3	2	248	2010	1	45	MSN	2	5	3					1	1	Cat IV	1	4	4	4	NEGATIVE						5	DTC MEHSANA	39	3	16.2331	155		NA	NA	39		1			32	0	2	2009	GOVERNMENT	HERZ,CAT2	2	12	0
3	2	249	2010	0	21	BAN	1	1	3					1	1	Cat IV	2	2	2	9	NEGATIVE						1	DTC PALANPUR	37	3	15.2038	156		NA	NA	37		0.5	0.6		0	0	1	2010	GOVERNMENT	CAT1	2	5	0
3	2	250	2010	1	30	AMC	2	5	3					1	1	Cat IV	2	2	2	9	NEGATIVE						9	SOUTH ZONE	33	2	12.8906	160		NA	NA	38	42	0.7	0.4		10	3	2	2008	GOVERNMENT	CAT1,CAT2	2	10	0
3	2	251	2010	1	30	BVN	2	7	1	1	1	1	1			Cat IV	2	2	9	9	NEGATIVE						5	DTC BHAVNAGAR	60	4	23.7332	159		NA	NA	60		0.5	0.6	1	8	0	4	2006	GOVERNMENT	2HERZ,CAT2 TWICE	1	24	0
3	2	252	2010	1	52	AND	2	5	1	1	1	2	1			Cat IV	2	2	3	3	NEGATIVE						5	SARSA	39	3	15.2344	160		NA	NA	43	45	0.8	0.8	0.8	0	31	2	2005	GOVERNMENT	CAT1,CAT2	2	12	0
3	2	253	2010	1	42	SBK	2	5	1	1	1	1	1			Cat IV	1	1	9	9	NEGATIVE						5	KHEDBRAHMA	73	5	24.3911	173		NA	NA	75	75	0.8			134	0	3	2008	GOVERNMENT	HERZ,CAT2 TWICE	1	20	0
3	2	254	2010	0	27	AMC	2	7	3					1	1	Cat IV	1	2	2	9	NEGATIVE						10	SOUTH ZONE	40	3	17.313	152		NA	NA	42	44	0.6	0.5		0	0	4	2005	GOVERNMENT	CAT2 FOUR TIMES	2	27	0
3	2	255	2010	1	60	AMC	2	5	1	1	1	1	1			Cat IV	2	2	2	9	NEGATIVE						9	LGH HOSPITAL	38	3	15.6147	156		NA	NA	40	39	0.5	0.5	0.3	0	0	2	2009	GOVERNMENT	CAT1,CAT2	2	10	1
3	2	256	2010	0	35	AND	2	5	3					1	1	Cat IV	2	2	2	9	NEGATIVE						5	ANKLAV	50	4	19.5313	160		NA	NA	50	50	0.8			6	61	3	2003	GOVERNMENT	HERZ,CAT2 TWICE	1	15	0
3	2	257	2010	1	38	PAT	2	5	3					1		Cat IV	2	2	2	9	NEGATIVE						4	DTC PATAN	45	4	15.2109	172		NA	NA	49	48	0.8	1	0.9	13	5	3	2006	PRIVATE	CAT3,CAT2,ETHIO,RIF	2	26	0
3	2	258	2010	1	29	AMC	2	7	3					1	1	Cat IV	4	4	4	4	NEGATIVE						10	WEST ZONE	31	2	17.0096	135		NA	NA			0.7			0	0	4	2008	GOVERNMENT	HRZE,HR,HRZES,HRE	1	15	0
3	2	259	2010	1	45	AMC	2	7	1	1	1	2	1			Cat IV	2	2	9	9	NEGATIVE						5	CHANDLODIA	70	5	22.8571	175		NA	NA	73	75	0.6			0	11	3	2008	GOVERNMENT	AKT IV,CAT 2 TWISE	1	22	0
3	2	260	2010	1	50	AMC	2	7	3					1	1	Cat IV	4	4	4	4	NEGATIVE						10	NORTH CENTRAL	48	4	17.0068	168		NA	NA			0.1			0	0	2	2009	GOVERNMENT	HERZ,CAT2	2	7	0
3	2	261	2010	1	45	KDA	2	6	3					1	1	Cat IV	4	4	4	4	NEGATIVE						2	KAPADVANJ	50	4	17.9282	167		NA	NA			0.8			0	0	2	2009	GOVERNMENT	CAT1,CAT2	2	8	0
3	2	262	2010	1	60	AMC	2	7	3					1	2	Cat IV	4	4	4	4	NEGATIVE						10	EAST ZONE	37	3	14.4531	160		NA	NA			0.6			0	0	3	2004	GOVERNMENT	CAT 2,AKT IV,CAT 2	1	20	0
3	2	263	2010	1	55	SRN	2	6	3					1	2	Cat IV	1	9	1	9	NEGATIVE						5	DHANGHARA	40	3	14.1723	168		NA	NA	45		0.9	0.5		0	18	2	2009	GOVERNMENT	CAT1,CAT2	2	13	0
3	2	264	2010	0	17	BAN	2	4	3	1	1	1	1	1	1	Cat IV	2	2	2	9	NEGATIVE						5	DTC PALANPUR	39	3	16.8802	152		NA	NA	50		0.6	0.7	0.6	0	0	2	2009	GOVERNMENT	HERZ,CAT2	2	14	0
3	2	265	2010	1	45	SBK	2	6	1	1	1	1	1			Cat IV	2	9	3	3	NEGATIVE						5	BHILODA	45	4	16.7311	164		NA	NA	45	44	0.9	0.9		10	24	3	2009	GOVERNMENT	CAT1,CAT2 TWICE	1	21	0
3	2	266	2010	1	38	SBK	1	6	3					1	1	Cat IV	1	1	1	9	NEGATIVE						2	DHANSURA	41	3	15.2439	164		NA	NA	40	38	0.9	0.9	0.8	0	4	1	2009	GOVERNMENT	CAT1	2	6	0
3	2	267	2010	1	30	PAT	2	5	3					1	1	Cat IV	2	2	2	9	NEGATIVE						10	DTC PATAN	42	3	16.0037	162		NA	NA	43	45	0.6	0.8	0.6	4	0	3	2008	GOVERNMENT	HRZE,CAT2 TWICE	1	16	0
3	2	268	2010	1	35	BAN	2	5	3					1	1	Cat IV	1	1	2	9	NEGATIVE						5	THARAD	42	3	14.881	168		NA	NA	43		0.4			0	0	1	2009	GOVERNMENT	CAT2	2	8	0
3	2	269	2010	1	20	BAN	1	1	3					1	1	Cat IV	2	2	2	9	NEGATIVE						1	THARAD	35	3	14.5682	155		NA	NA			0.9			0	0	1	2010	GOVERNMENT	CAT1	2	5	0
3	2	270	2010	0	20	KDA	1	6	1	1	1	1	1			Cat IV	2	1	2	9	NEGATIVE						9	NADIAD	35	3	14.0202	158		NA	NA	37	39	0.7	0.6	0.7	6	0	1	2010	GOVERNMENT	CAT1	2	5	0
3	2	271	2010	1	22	PAT	2	7	3					1	1	Cat IV	1	2	2	9	NEGATIVE						4	DTC PATAN	54	4	20.0773	164		NA	NA	65	65	0.5	0.7	0.8	0	0	2	2008	GOVERNMENT	HERZ,CAT2	2	10	0
3	2	272	2010	0	30	BVN	2	5	1	1	1	1	1			Cat IV	1	9	1	9	NEGATIVE						9	DTC BHAVNAGAR	26	2	11.2535	152		NA	NA	30	28	0.6			0	13	4	2002	GOVERNMENT	SHERZ, PVT,CAT2	2	90	0
3	2	273	2010	1	45	AMC	2	7	3					1	1	Cat IV	2	2	2	9	NEGATIVE						4	EAST ZONE	35	3	13.3364	162		NA	NA	35	36	0.7	0.7	0.8	5	0	4	1999	GOVERNMENT	HERZ,CAT2 TWICE	1	15	0
3	2	274	2010	1	43	AND	2	6	1	1	1	2	1			Cat IV	4	4	4	4	NEGATIVE						2	ANKLAV	42	3	15.8079	163		NA	NA			0.4			0	0	2	1999	GOVERNMENT	CAT1,CAT2	2	9	0
3	2	275	2010	1	45	AMC	2	5	3					1	1	Cat IV	2	2	3	3	NEGATIVE						4	LGH HOSPITAL	45	4	17.5781	160		NA	NA	45	42	0.6	0.8	0.6	0	0	3	2005	GOVERNMENT	CAT2 THRICE	2	24	0
3	2	276	2010	1	40	AMD	1	1	1	1	1	1	1			Cat IV	2	2	3	3	NEGATIVE						5	DHANDHUKA	42	3	15.6157	164		NA	NA	42		0.4	0.7		5	0	1	2009	GOVERNMENT	CAT1	2	6	0
3	2	277	2010	1	35	SBK	2	6	3					1	1	Cat IV	1	1	1	9	NEGATIVE						5	DHANSURA	40	3	15.625	160		NA	NA	43	42	0.3	0.3	1	16	0	2	2007	GOVERNMENT	CAT1,CAT2	2	19	0
3	2	278	2010	0	45	BVN	2	6	1	1	1	1	1			Cat IV	2	2	4	4	NEGATIVE						2	DTC BHAVNAGAR	30	2	12.0173	158		NA	NA	27		0.7	0.7		3	0	3	2008	GOVERNMENT	HERZ,CAT2 TWICE	1	22	0
3	2	279	2010	0	25	PAT	2	7	3					1	1	Cat IV	2	2	1	9	NEGATIVE		2012-12-01				3	DTC PATAN	33	2	13.219	158		NA	NA	34	37	0.4	0.8	0.8	34	15	2	2009	GOVERNMENT	HERZ,CAT2	2	8	0
3	2	280	2010	0	29	AMC	2	5	1	1	1	2	2			Cat IV	3	3	3	3	NEGATIVE						10	WEST ZONE	31	2	12.7383	156		NA	NA	30		1			0	0	2	2008	GOVERNMENT	CAT3,CAT2	2	14	0
3	2	281	2010	1	40	SBK	2	6	3					1	2	Cat IV	2	2	1	9	NEGATIVE						9	DHANSURA	58	4	20.0692	170		NA	NA	60	60	0.9	0.8	1.2	0	0	3	2007	GOVERNMENT	CAT1,CAT2 TWICE	1	21	0
3	2	282	2010	1	18	AMC	1	1	3					1	1	Cat IV	1	1	3	3	NEGATIVE						10	NORTH CENTRAL	36	3	11.7551	175		NA	NA			1			12	0	1	2009	GOVERNMENT	CAT1	2	5	0
3	2	283	2010	1	7	BVN	2	7	1	1	1	2	1			Cat IV	2	1	1	9	NEGATIVE						5	DTC BHAVNAGAR	14	1	17.284	90		NA	NA	15	16	0.7	0.3	0.9	0	4	2	2009	GOVERNMENT	HERZ,CAT2	2	13	0
3	2	284	2010	1	39	BVN	2	6	1	1	1	1	1			Cat IV	4	4	4	4	NEGATIVE						5	DTC BHAVNAGAR	82	5	27.7177	172		NA	NA			0.8			0	0	3	2007	GOVERNMENT	SHERZ,CAT2 TWICE	1	24	0
3	2	285	2010	1	31	RJT	2	6	1	1	1	1	1			Cat IV	2	2	2	9	NEGATIVE						9	PK HOSPITAL	48	4	19.4734	157		NA	NA	50	51	0.5	0.6	0.6	26	0	3	2009	GOVERNMENT	CAT1,CAT2 TWICE	1	14	0
3	2	286	2010	1	30	BAN	2	6	1	1	1	2	1			Cat IV	2	2	3	3	NEGATIVE						5	VADGAM	30	2	11.4312	162		NA	NA	31		0.5			0	0	2	2007	GOVERNMENT	CAT2,ND	2	20	0
3	2	287	2010	1	30	GNR	1	1	3					1	1	Cat IV	1	1	3	3	NEGATIVE						5	MANSA	32	2	13.1492	156		NA	NA	30		0.6	0.9	0.8	43	0	1	2010	GOVERNMENT	CAT1	2	6	0
3	2	288	2010	1	53	RJT	2	6	1	1	1	2	2			Cat IV	1	4	4	4	NEGATIVE		2012-12-01				5	UPLETA	53	4	23.5556	150		NA	NA	54		1	0.9	0.9	78	0	4	2004	GOVERNMENT	CAT1,HERZ,CAT2 TWICE	1	18	0
3	2	289	2010	1	44	AMC	2	5	3					1	2	Cat IV	2	2	4	4	NEGATIVE						10	AMRAIWADI	51	4	19.9219	160		NA	NA	54	55	0.9			41	0	3	2006	GOVERNMENT	CAT1,CAT2 THRICE	1	22	1
3	2	290	2010	1	45	MSN	1	6	3					1	2	Cat IV	4	4	4	4	NEGATIVE						4	DTC MEHSANA	42	3	14.881	168		NA	NA			0.5			0	0	1	2009	GOVERNMENT	CAT1	2	6	0
3	2	291	2010	0	17	AND	2	5	3					1	1	Cat IV	2	2	2	9	NEGATIVE						5	DTC PETLAD	20	1	11.1383	134		NA	NA	25	24	0.5			0	0	3	2005	GOVERNMENT	PVT,CAT2 TWICE	1	18	0
3	2	292	2010	0	45	GNR	2	5	3					1	1	Cat IV	4	4	4	4	NEGATIVE						5	DTC GANDHINAGAR	40	3	15.625	160		NA	NA			0.6			42	0	2	2005	GOVERNMENT	CAT1,CAT2	2	10	0
3	2	293	2010	1	40	KDA	1	1	3					1	1	Cat IV	2	2	2	9	NEGATIVE						9	NADIAD	47	4	20.8889	150		NA	NA	48	46	0.6	0.6	0.7	30	0	1	2010	GOVERNMENT	CAT1	2	5	0
3	2	294	2010	0	29	BAN	2	6	3					1	1	Cat IV	1	1	4	4	NEGATIVE						5	DANTA	30	2	16.2197	136		NA	NA	31		0.7			0	0	1	2009	GOVERNMENT	CAT2	2	8	0
3	2	295	2010	1	20	SBK	1	1	3					1	1	Cat IV	2	2	2	9	NEGATIVE						5	IDAR	50	4	18.5901	164		NA	NA	56	58	0.9	0.7	0.8	4	0	1	2010	GOVERNMENT	CAT1	2	7	0
3	2	296	2010	0	17	SRN	2	6	3					1	1	Cat IV	2	2	2	9	NEGATIVE						3	MULI	40	3	16.6493	155		NA	NA	41	41	1	0.5		0	0	3	2004	GOVERNMENT	CAT1,CAT2 TWICE	1	23	0
3	2	297	2010	1	36	SRN	2	6	3					1	2	Cat IV	2	2	9	9	NEGATIVE						10	DHANGHARA	40	3	15.625	160		NA	NA	41		0.2	0.1		0	0	2	2009	GOVERNMENT	CAT1,CAT2	2	9	0
3	2	298	2010	1	45	SBK	2	5	3					1	2	Cat IV	2	2	2	9	NEGATIVE						5	DTC HIMMATNAGAR	46	4	18.4265	158		NA	NA	49	50	0.6	0.7	0.7	0	0	2	2007	GOVERNMENT	HRZE,CAT2	2	10	0
3	2	299	2010	0	20	AND	2	5	3					1	2	Cat IV	2	2	2	9	NEGATIVE						9	DTC PETLAD	33	2	13.388	157		NA	NA	37	37	0.6	0.6	0.6	0	0	2	2004	GOVERNMENT	CAT1,CAT2	2	15	0
3	2	300	2010	1	25	AMC	1	1	3					1	1	Cat IV	9	2	2	9	NEGATIVE						10	AMRAIWADI	40	3	17.0874	153		NA	NA	38	38	0.6			0	0	1	2010	GOVERNMENT	CAT2	2	8	0
3	2	301	2010	0	35	RJT	2	6	1	1	1	1	1			Cat IV	1	1	1	9	NEGATIVE						9	MORBI	33	2	13.9147	154		NA	NA	37	38	0.6	0.6	1	0	0	4	2007	GOVERNMENT	HERZ,CAT2 THRICE	1	33	0
3	2	302	2010	0	12	AML	2	6	3					1	1	Cat IV	1	2	2	9	NEGATIVE						9	DTC AMRELI	22	1	15.2778	120		NA	NA	26	28	0.6	0.8	0.7	0	0	3	2008	GOVERNMENT	CAT1,CAT2 TWICE	1	18	0
3	2	303	2010	1	40	AMC	2	5	3					1	2	Cat IV	1	9	2	9	NEGATIVE						4	LGH HOSPITAL	38	3	14.4795	162		NA	NA	40	36	0.9	0.5	0.9	0	0	2	2007	GOVERNMENT	CAT1.CAT2	2	15	0
3	2	304	2010	1	55	SRN	2	7	3					1	1	Cat IV	2	2	2	9	NEGATIVE						4	DTC SURENDRANAGAR	37	3	14.0985	162		NA	NA	39		0.6	0.6		0	0	2	2006	GOVERNMENT	HRZE,CAT2	2	10	0
3	2	305	2010	0	18	BVN	2	5	1	1	1	2	1			Cat IV	2	2	2	9	NEGATIVE						5	DTC BHAVNAGAR	40	3	15.625	160		NA	NA	45	45	0.6	0.7	0.8	0	0	3	2008	GOVERNMENT	CAT3,CAT2 TWICE	1	19	0
3	2	306	2010	0	56	AMD	2	5	3					1	1	Cat IV	1	1	1	9	NEGATIVE						5	VIRAMGAM	39	3	15.2344	160	3/25/2011	VOMMITING,NOSIA	KM STOP	40		0.6			31	0	2	2009	GOVERNMENT	HRZE,CAT2	2	10	0
3	2	307	2010	0	22	AMC	1	1	3					1	1	Cat IV	3	3	3	3	NEGATIVE						5	LGH HOSPITAL	20	1	7.8125	160		NA	NA			0.6			0	0	1	2009	GOVERNMENT	CAT1	2	5	0
3	2	308	2010	1	38	BAN	2	6	1	1	1	1	1			Cat IV	2	2	2	9	NEGATIVE						5	DEESA	40	3	14.8721	164		NA	NA	40	45	0.7			0	0	2	2008	GOVERNMENT	CAT2 TWICE	1	16	0
3	2	309	2010	0	27	AMC	2	7	3					1	1	Cat IV	1	1	3	3	NEGATIVE						4	CHANDLODIA	45	4	15.9439	168		NA	NA	45	43	0.5			122	0	3	2006	GOVERNMENT	HRZE TWICE, CAT2	1	10	0
3	2	310	2010	1	22	KDA	2	7	3					1	1	Cat IV	2	2	2	9	NEGATIVE						9	NADIAD	40	3	15.625	160		NA	NA	39	40	0.6	0.6	0.6	5	0	2	2009	GOVERNMENT	HRZE,CAT2	2	7	0
3	2	311	2010	1	21	AMC	1	1	3					1	1	Cat IV	2	2	2	9	NEGATIVE						10	AMRAIWADI	40	3	15.2416	162		NA	NA	51	51	0.6			0	0	1	2010	GOVERNMENT	HRZE	2	7	0
3	2	312	2010	0	25	AND	2	5	3					1	1	Cat IV	9	1	1	9	NEGATIVE						9	DTC PETLAD	35	3	14.5682	155		NA	NA	39	34	0.6	0.7	0.9	0	2	2	2009	GOVERNMENT	HRZE,CAT2	2	11	0
3	2	313	2010	1	24	BAN	2	6	3					1	1	Cat IV	9	9	1	9	NEGATIVE						5	DHANERA	40	3	15.8222	159		NA	NA	40		0.8	0.7	0.6	0	0	2	2007	GOVERNMENT	CAT2 TWISE	1	10	0
3	2	314	2010	1	36	AMC	2	7	3					1	1	Cat IV	2	9	2	9	NEGATIVE						4	EAST ZONE	43	3	16.1843	163		NA	NA	43	44	0.4	0.8	0.7	0	0	3	2008	GOVERNMENT	AKT IV TWISE,CAT 2	1	16	0
3	2	315	2010	1	40	SBK	2	6	3					1	2	Cat IV	2	2	2	9	NEGATIVE						5	IDAR	30	2	11.4312	162		NA	NA	35	35	0.4	0.7		0	0	2	2008	GOVERNMENT	HRZE,CAT2	2	14	0
3	2	316	2010	1	45	AMC	1	1	3					1	1	Cat IV	2	2	2	9	NEGATIVE						9	SCL HOSPITAL	45	4	18.026	158		NA	NA	45	46	0.9	0.7	1	0	0	1	2010	GOVERNMENT	CAT 1	2	6	0
3	2	317	2010	1	40	BAN	2	7	3					1	1	Cat IV	3	3	3	3	NEGATIVE						5	DEESA	25	2	9.76563	160		NA	NA			0.5			2	0	2	2007	GOVERNMENT	HRZE,CAT2	2	28	0
3	2	318	2010	1	48	AMC	2	5	3					1	1	Cat IV	2	3	3	3	NEGATIVE						10	SOUTH ZONE	45	4	16.7311	164		NA	NA	46		0.7	0.6		0	0	3	2006	GOVERNMENT	CAT 1,CAT 2 TWISE	1	24	0
3	2	319	2010	1	51	GNR	2	5	3					1	1	Cat IV	2	2	2	9	NEGATIVE						9	DTC GANDHINAGAR	45	4	17.1468	162		NA	NA	52	58	0.6	0.8	0.8	0	0	3	2008	GOVERNMENT	CAT1,CAT2 TWICE	1	21	0
3	2	320	2010	1	39	GNR	1	1	1	1	1	2	1			Cat IV	2	2	2	9	NEGATIVE						5	DEHGAM	48	4	17.0068	168		NA	NA	53	56	0.7	0.8		46	19	1	2010	GOVERNMENT	CAT1	2	6	0
3	2	321	2010	1	30	AMC	2	5	3					1	2	Cat IV	2	2	1	9	NEGATIVE		2012-12-01				10	EAST ZONE	45	4	17.1468	162		NA	NA	45	44	1.1	0.6	1.2	0	14	3	1995	GOVERNMENT	HRZE,CAT2 TWICE	1	21	0
3	2	322	2010	1	21	AMC	3	1	3					1	1	Cat IV	2	2	2	9	NEGATIVE						4	LGH HOSPITAL	45	4	17.5781	160		NA	NA	45	56	0.7	0.6	0.5	0	0	1	2010	GOVERNMENT	CAT 3	2	2	0
3	2	323	2010	0	36	AMC	6	6	3					1	1	Cat IV	9	2	2	9	NEGATIVE						9	EAST ZONE	29	2	11.0501	162		NA	NA	32	33	0.5	0.6	0.7	0	1	3	2004	GOVERNMENT	CAT1,CAT2,ND1	2	26	0
3	2	324	2010	1	27	SBK	2	4	3					1	1	Cat IV	2	2	2	9	NEGATIVE						2	BHILODA	36	3	13.7174	162		NA	NA	38	38	0.6			6	0	5	2005	GOVERNMENT	CAT1,CAT2 FOUR TIME	1	38	0
3	2	325	2010	0	40	AMC	1	1	3					1	1	Cat IV	2	2	2	9	NEGATIVE						10	CENTRAL ZONE	42	3	18.6667	150		NA	NA	42	42	0.7			35	38	1	2010	GOVERNMENT	CAT1	2	5	0
3	2	326	2010	0	35	AMC	2	5	1	1	1	1	1			Cat IV	2	2	2	9	NEGATIVE						10	WEST ZONE	25	2	9.88885	159		NA	NA	28	29	0.6	0.5		0	0	2	2008	GOVERNMENT	CAT1,CAT2	2	10	0
3	2	327	2010	1	30	AMC	2	7	3					1	1	Cat IV	2	1	4	4	NEGATIVE						10	SCL HOSPITAL	39	3	15.6225	158		NA	NA	39		0.6	0.7		0	0	3	1995	GOVERNMENT	SHR,HRZE,KM,CAT2	1	18	0
3	2	328	2010	1	57	AMC	2	6	1	1	1	1	1			Cat IV	2	2	2	9	NEGATIVE						10	NORTH CENTRAL	62	4	21.9671	168		NA	NA	62	59	1.1			14	0	2	2009	GOVERNMENT	CAT1,CAT2	2	14	1
3	2	329	2010	0	25	AMC	1	1	3					1	1	Cat IV	9	2	2	9	NEGATIVE						10	WEST ZONE	37	3	15.2038	156		NA	NA	37		0.7			0	0	1	2010	GOVERNMENT	CAT1	2	6	0
3	2	330	2010	1	32	KDA	2	5	3					1	1	Cat IV	2	2	2	9	NEGATIVE						5	MATAR	43	3	15.7943	165		NA	NA	43	44	0.6	0.6	0.8	0	4	4	2004	GOVERNMENT	CAT3,CAT2 THRICE	1	28	0
3	2	331	2010	1	60	BVN	2	6	1	1	1	1	1			Cat IV	2	1	2	9	NEGATIVE						5	PALITANA	43	3	17.898	155		NA	NA	45	45	0.8	0.7	0.7	18	0	3	2002	GOVERNMENT	CAT2 THRICE	2	24	0
3	2	332	2010	1	29	AMC	2	7	3					1	1	Cat IV	1	2	1	9	NEGATIVE						9	MEMNAGAR	34	2	14.3363	154		NA	NA	37	34	0.4	0.8	0.7	67	0	3	2008	GOVERNMENT	CAT1,CAT2 TWICE	1	16	0
3	2	333	2010	0	32	SBK	2	5	3					1	1	Cat IV	1	9	1	9	NEGATIVE						2	IDAR	46	4	19.6506	153		NA	NA	46	47	0.7	0.3		0	0	3	2008	GOVERNMENT	CAT1,CAT2 TWICE	1	22	0
3	2	334	2010	1	50	AMC	6	7	1	1	1	1	1			Cat IV	1	2	9	9	NEGATIVE						4	EAST ZONE	36	3	11.8906	174		NA	NA	39	38	0.8	0.7	0.8	48	2	4	2004	GOVERNMENT	CAT 1,CAT 2,AKT IV,ND1	2	18	0
3	2	335	2010	0	18	AMC	2	5	3					1	2	Cat IV	1	4	4	4	NEGATIVE						10	SCL HOSPITAL	37	3	19.7134	137		NA	NA	33		0.5	0.9	0.7	10	0	3	2006	GOVERNMENT	CAT1,CAT2 TWICE	1	19	0
3	2	336	2010	1	25	AND	2	5	3					1	1	Cat IV	2	2	2	9	NEGATIVE						9	DTC PETLAD	36	3	14.4208	158		NA	NA	44	43	1			2	13	2	2010	GOVERNMENT	HRZE,CAT2	2	11	0
3	2	337	2010	0	30	AND	2	7	3					1	1	Cat IV	1	2	2	9	NEGATIVE						4	KHAMBHAT	40	3	15.625	160		NA	NA	42	40	0.6	1	0.9	1	1	2	2009	GOVERNMENT	HRZE,CAT2	2	10	0
3	2	338	2010	0	36	AND	1	1	3					1	1	Cat IV	2	2	2	9	NEGATIVE						9	ANKLAV	32	2	16.3265	140		NA	NA	35	36	0.8	0.9		0	0	1	2010	GOVERNMENT	CAT1	2	6	0
3	2	339	2010	0	27	AND	2	7	3					1	1	Cat IV	1	2	1	9	NEGATIVE		2012-12-01				5	SARSA	30	2	15.3061	140		NA	NA	33	34	0.5	0.5	0.5	0	8	2	2008	GOVERNMENT	CAT1,CAT2	2	8	0
3	2	340	2010	1	38	AMC	2	7	3					1	1	Cat IV	2	2	9	9	NEGATIVE						1	LGH HOSPITAL	36	3	15.5817	152		NA	NA			0.8			19	0	3	2007	GOVERNMENT	HRZE TWICE, CAT2	1	8	0
3	2	341	2010	0	20	MSN	1	1	3					1	2	Cat IV	2	2	9	9	NEGATIVE						5	DTC MEHSANA	30	2	12.0173	158		NA	NA	33	35	0.7		0.7	5	0	1	2009	GOVERNMENT	CAT1	2	6	0
3	2	342	2010	0	20	AMC	2	7	3					1	1	Cat IV	1	1	3	3	NEGATIVE						10	SCL HOSPITAL	36	3	14.4208	158		NA	NA	39		0.6	0.5	0.7	18	0	4	2007	GOVERNMENT	CAT 1,HRZE,AKT IV,CAT 2	2	28	0
3	2	343	2010	0	27	AMC	1	1	3					1	1	Cat IV	1	1	1	9	NEGATIVE						10	NORTH CENTRAL	29	2	12.5519	152		NA	NA	34	35	0.9			0	0	1	2010	GOVERNMENT	CAT 1	2	6	0
3	2	344	2010	1	16	BAN	5	8	3					1	1	Cat IV	2	2	2	9	NEGATIVE						5	DTC PALANPUR	32	2	15.8699	142		NA	NA	37		0.9			0	0	1			CONTECT PERSONE	2		0
3	2	345	2010	1	40	AMC	2	5	3					1	1	Cat IV	3	3	3	3	NEGATIVE						4	MEMNAGAR	30	2	11.0193	165		NA	NA			0.5			0	0	3	2010	GOVERNMENT	CAT 1,CAT 2 TWISE	1	17	0
3	2	346	2010	0	28	KDA	2	7	3					1	1	Cat IV	1	1	1	9	NEGATIVE						2	BALVA	33	2	15.9144	144		NA	NA	32	32	0.8	0.7	0.9	65	0	3	2009	GOVERNMENT	AKT4,CAT2 TWISE	1	14	0
3	2	347	2010	1	38	AMC	8	9	3					1	1	Cat IV	1	2	1	9	NEGATIVE						10	SCL HOSPITAL	40	3	15.625	160		NA	NA	37	38	0.5	0.7	0.5	0	0	2	2009	PRIVATE	HRZE TWISE	1	8	0
3	2	348	2010	1	40	AMC	1	1	3					1	1	Cat IV	1	1	1	9	NEGATIVE						4	CENTRAL ZONE	55	4	20.202	165		NA	NA	58		1.1		0.9	12	10	1	2010	GOVERNMENT	CAT 1	2	5	0
3	2	349	2010	0	48	AMC	2	7	3					1	2	Cat IV	2	2	2	9	NEGATIVE						10	AMRAIWADI	40	3	15.2416	162		NA	NA	42	42	0.5			0	0	3	2009	GOVERNMENT	CAT1,HRZE,CAT2	2	7	1
3	2	350	2010	0	25	AMD	2	6	3					1	1	Cat IV	1	2	1	9	NEGATIVE						1	DHANDHUKA	28	2	11.6545	155		NA	NA	33		0.5			23	0	1	2010	GOVERNMENT	CAT2	2	6	0
3	2	351	2010	0	23	BAN	2	5	3					1	1	Cat IV	1	1	3	3	NEGATIVE						5	DTC PALANPUR	40	3	16.4366	156		NA	NA	40		0.5			5	0	4	2004	GOVERNMENT	HRZE,CAT2 TWICE,ND1	1	52	0
3	2	352	2010	1	31	AMC	1	1	3					1	2	Cat IV	2	2	2	9	NEGATIVE						10	CHANDLODIA	42	3	18.6667	150		NA	NA	42	42	0.7			0	0	1	2009	GOVERNMENT	CAT1	2	6	0
3	2	353	2010	1	38	AND	1	1	3					1	2	Cat IV	2	2	2	9	NEGATIVE						5	SARSA	42	3	18.1787	152		NA	NA	43	45	1	0.8	1	0	0	1	2010	GOVERNMENT	CAT1	2	6	0
3	2	354	2010	1	32	AMC	6	7	3					1	2	Cat IV	2	2	2	9	NEGATIVE						10	SCL HOSPITAL	42	3	16.4063	160		NA	NA	40	41	0.6	0.6	0.5	19	10	3	2007	GOVERNMENT	CAT 1,CAT 2,ND1	2	18	0
3	2	355	2010	0	18	BVN	2	6	1	1	1	2	1			Cat IV	2	2	2	9	NEGATIVE						1	PALITANA	40	3	17.7778	150		NA	NA	40	42	0.7	0.5	0.6	0	0	2	2009	GOVERNMENT	CAT1,CAT2	2	14	0
3	2	356	2010	0	35	AMC	2	7	1	1	1	1	1			Cat IV	2	2	2	9	NEGATIVE						10	NORTH CENTRAL	35	3	13.6719	160		NA	NA	38	38	0.4			0	0	2	2009	GOVERNMENT	HRZE,CAT2	2	16	0
3	2	357	2010	1	28	MSN	2	5	3					1	1	Cat IV	1	1	1	9	NEGATIVE						4	DTC MEHSANA	35	3	13.6719	160		NA	NA	35	42	0.7		0.5	0	0	3	2007	GOVERNMENT	HRZE,CAT2 TWICE	1	12	0
3	2	358	2010	1	28	AMC	2	5	3					1	1	Cat IV	2	2	2	9	NEGATIVE						10	AMRAIWADI	50	4	20.5457	156		NA	NA	50	51	0.7			0	0	2	2009	GOVERNMENT	CAT1,CAT2	2	10	0
3	2	359	2010	1	20	BAN	1	1	3					1	1	Cat IV	1	2	2	9	NEGATIVE						2	DEESA	40	3	15.2416	162		NA	NA	40		0.3			9	0	1	2010	GOVERNMENT	HRZE	2	6	0
3	2	360	2010	1	50	AMC	6	7	1	1	1	1	1			Cat IV	1	1	1	9	NEGATIVE						10	EAST ZONE	40	3	15.2416	162		NA	NA	41	41	0.8	0.7	0.8	12	5	3	2008	GOVERNMENT	CAT1,CAT2 TWICE	1	14	0
3	2	361	2010	1	37	BVN	2	6	1	1	1	1	1			Cat IV	3	3	3	3	NEGATIVE						9	DTC BHAVNAGAR	37	3	14.0985	162		NA	NA	34		1	1	1	151	0				NA	2		0
3	2	362	2010	1	20	RJT	2	6	1	1	1	1	1			Cat IV	3	3	3	3	NEGATIVE						10	DTC RAJKOT	60	4	21.7738	166		NA	NA			1.6			27	0	2	2008	GOVERNMENT	CAT1,CAT2	2	14	0
3	2	363	2010	0	25	AND	2	5	1	1	1	1	1			Cat IV	1	2	2	9	NEGATIVE						1	DTC PETLAD	32	2	14.4138	149		NA	NA	35	39	0.4		0.6	31	0	2	2009	GOVERNMENT	HRZE,CAT2	2	14	0
3	2	364	2010	1	70	GNR	2	7	3					1	1	Cat IV	1	1	1	9	NEGATIVE						1	MANSA	34	2	13.9711	156		NA	NA	35	35	0.7	0.7	0.9	26	0	1	2009	GOVERNMENT	HRZE	2	11	0
3	2	365	2010	1	45	RJT	2	6	1	1	1	2	1			Cat IV	2	2	2	9	NEGATIVE						9	DTC RAJKOT	46	4	17.9688	160		NA	NA	49	51	0.6	0.7		0	11	4	2005	GOVERNMENT	CAT1,CAT2 THRICE	1	30	0
3	2	366	2010	1	42	AMC	6	7	3					1	2	Cat IV	9	2	9	9	NEGATIVE						10	EAST ZONE	35	3	13.0131	164		NA	NA	35	39	0.7	0.1	0.8	20	10	5	1992	GOVERNMENT	HRZE,CAT THRICE,ND1	1	35	0
3	2	367	2010	1	30	SRN	2	6	3					1	1	Cat IV	2	2	1	9	NEGATIVE						1	SAYLA	60	4	19.5918	175		NA	NA	64		0.8	0.9		0	0	3	2008	GOVERNMENT	CAT1,CAT2 TWICE	1	22	0
3	2	368	2010	1	40	SRN	2	6	1	1	1	2	2			Cat IV	1	1	1	9	NEGATIVE						2	DHANGHARA	60	4	19.5918	175		NA	NA	63		0.9	1		0	0	2	2008	GOVERNMENT	HRZE,CAT2	2	11	0
3	2	369	2010	1	30	AMC	1	1	3					1	1	Cat IV	3	3	3	3	NEGATIVE						5	LGH HOSPITAL	38	3	14.8438	160		NA	NA	38		0.7			0	0	1	2010	GOVERNMENT	CAT 1	2	5	0
3	2	370	2010	0	25	KDA	2	7	3					1	1	Cat IV	1	2	3	3	NEGATIVE						4	NADIAD	34	2	14.1519	155		NA	KM STOP	28		0.8		0.6	53	0	3	2009	GOVERNMENT	HRZE,CAT2 TWISE	1	13	0
3	2	371	2010	0	28	AMC	2	7	1	1	1	1	1			Cat IV	2	2	1	9	NEGATIVE						10	SCL HOSPITAL	28	2	12.1191	152		NA	NA	35	34	0.5	0.8	0.5	10	0	2	2004	GOVERNMENT	HRZE,CAT 2	2	11	0
3	2	372	2010	1	40	AMC	1	1	3					1	1	Cat IV	4	4	4	4	NEGATIVE						5	SOUTH ZONE	82	5	24.7555	182		NA	NA			1.1			0	0				NA	2		1
3	2	373	2010	1	54	AMC	2	7	1	1	1	2	2			Cat IV	2	2	2	9	NEGATIVE						10	CENTRAL ZONE	62	4	21.4533	170		NA	NA	62	61	0.8			0	0	2	2005	GOVERNMENT	HRZE,CAT2	2	15	0
3	2	374	2010	1	27	GNR	2	6	1	1	1	1	2			Cat IV	2	2	2	9	NEGATIVE						9	DTC GANDHINAGAR	56	4	17.284	180		NA	NA	61	67				51	11	4	2004	GOVERNMENT	CAT1,CAT2 THRICE	1	22	0
3	2	375	2010	1	19	SBK	2	6	3					1	1	Cat IV	2	2	2	9	NEGATIVE						1	BHILODA	38	3	16.0229	154		NA	NA	39	42	0.6	0.8		0	42	2	2009	GOVERNMENT	CAT1,CAT2	2	14	0
3	2	376	2010	1	23	SBK	2	7	3					1	1	Cat IV	1	1	9	9	NEGATIVE						2	DTC HIMMATNAGAR	40	3	16.0231	158		NA	NA	44	43	0.6	0.2		5	0	1	2007	GOVERNMENT	CAT2	2	8	0
3	2	377	2010	1	40	AMC	2	7	3					1	2	Cat IV	1	1	9	9	NEGATIVE						9	SOUTH ZONE	40	3	15.625	160		NA	NA	43		0.6			64	0	3	2007	GOVERNMENT	CAT1,CAT2 TWICE	1	22	0
3	2	378	2010	0	50	KDA	2	6	3					1	2	Cat IV	2	2	2	9	NEGATIVE						2	BALASINOR	35	3	14.758	154		NA	NA	35	36	0.7		0.6	20	23	2	2009	GOVERNMENT	CAT3,CAT2	2	14	0
3	2	379	2010	1	20	SRN	2	5	3					1	1	Cat IV	1	2	2	9	NEGATIVE						5	DTC SURENDRANAGAR	41	3	16.4237	158		NA	NA	45		0.6	0.9	1.1	0	0	3	2007	GOVERNMENT	CAT1,CAT2 TWICE	1	14	0
3	2	380	2010	1	48	MSN	2	5	3					1	1	Cat IV	2	2	2	9	NEGATIVE						9	DTC MEHSANA	49	4	17.3611	168		NA	NA	49	49	0.7			4	0	2	2009	GOVERNMENT	CAT1,CAT2	2	14	0
3	2	381	2010	1	35	AMC	2	7	3					1	1	Cat IV	9	2	1	9	NEGATIVE		2012-12-01				10	LGH HOSPITAL	60	4	20.2812	172		NA	NA	59		0.9		0.9	12	0	2	2010	GOVERNMENT	AKT IV,CAT 2	2	11	0
3	2	382	2010	1	27	AMC	1	1	3					1	1	Cat IV	2	2	1	9	NEGATIVE						10	EAST ZONE	51	4	17.6471	170		NA	NA	49	49	0.5	0.8	0.6	18	9	1	2010	GOVERNMENT	CAT1	2	5	1
3	2	383	2010	1	40	AMC	2	5	3					1	2	Cat IV	3	3	3	3	NEGATIVE						10	SOUTH ZONE	38	3	15.6147	156		NA	NA			0.5					2	2007	GOVERNMENT	CAT 1,CAT 2	2	9	0
3	2	384	2010	1	40	BAN	2	7	3					1	2	Cat IV	2	2	1	9	NEGATIVE						4	DHANERA	29	2	12.5519	152		NA	NA			0.7			0	58	3	2008	GOVERNMENT	HRZE TWICE, CAT2	1	18	0
3	2	385	2010	0	25	BAN	2	7	3					1	1	Cat IV	1	1	1	9	NEGATIVE						5	DEESA	44	3	14.8729	172		NA	NA			0.6			0	0	3	2008	GOVERNMENT	CAT1,CAT2 TWICE	1	14	0
3	2	386	2010	0	32	KDA	2	5	3					1	1	Cat IV	2	1	2	9	NEGATIVE						1	KATHLAL	45	4	17.1468	162		NA	NA	49	52	0.7	0.8	0.7	18	7	3	2006	GOVERNMENT	CAT2 THRICE	2	21	0
3	2	387	2010	1	38	GNR	2	7	1	1	1	1	1			Cat IV	1	2	1	9	NEGATIVE		2012-12-01				9	DTC GANDHINAGAR	50	4	17.301	170		NA	NA	49	49	0.7	0.7		98	6	4	2004	GOVERNMENT	HRZE,SHRZE,CAT2	2	14	0
3	2	388	2010	1	45	SBK	1	1	1	1	1	1	2			Cat IV	2	2	2	9	NEGATIVE						5	BHILODA	41	3	15.2439	164		NA	NA	40	38	0.6	0.8		120	0	1	2010	GOVERNMENT	CAT2	2	5	0
3	2	389	2010	1	21	AMC	2	7	3					1	1	Cat IV	2	2	2	9	NEGATIVE						10	NORTH CENTRAL	55	4	20.9572	162		NA	NA	55	55	1			0	0	2	2009	GOVERNMENT	HRZE,CAT2	2	13	0
3	2	390	2010	1	45	MSN	2	6	3					1	1	Cat IV	2	2	2	9	NEGATIVE						5	VISNAGAR	50	4	17.301	170		NA	NA	48	48	0.8			72	12	2	2008	GOVERNMENT	CAT1,CAT2	2	14	1
3	2	391	2010	1	35	AMD	1	1	3					1	1	Cat IV	2	2	2	9	NEGATIVE						1	BAVLA	33	2	14.2832	152		NA	NA			1.1			0	8	1	2010	GOVERNMENT	CAT1	2	6	0
3	2	392	2010	0	30	AMC	2	5	3					1	2	Cat IV	3	3	3	3	NEGATIVE						9	EAST ZONE	26	2	11.5556	150		NA	NA			0.7	0.9		0	0	3	2006	GOVERNMENT	AKT IV,CAT 2 TWISE	1	21	0
3	2	393	2010	0	30	AMC	2	7	3					1	1	Cat IV	2	2	2	9	NEGATIVE						7	SOUTH ZONE	42	3	16.0037	162		NA	NA	54	54	0.4			0	0	2	2009	GOVERNMENT	HRZE,CAT2	2	18	0
3	2	394	2010	1	33	MSN	2	6	3					1	2	Cat IV	3	3	3	3	NEGATIVE						5	KADI	36	3	13.7174	162		NA	NA			1			0	0	2	2008	GOVERNMENT	HRZE,CAT1, CAT2	2	13	0
3	2	395	2010	1	50	AMC	2	5	3					1	1	Cat IV	2	2	9	9	NEGATIVE						2	CENTRAL ZONE	44	3	16.1616	165		NA	NA	44	56	0.7		0.9	0	0	2	2008	GOVERNMENT	CAT1,CAT2	2	9	0
3	2	396	2010	1	22	AMC	2	5	1	1	1	2	1			Cat IV	1	1	9	9	NEGATIVE						10	CENTRAL ZONE	51	4	19.433	162		NA	NA	51	51	0.8			118	0	2	2009	GOVERNMENT	CAT1,CAT2	2	10	0
3	2	397	2010	1	40	AND	2	5	3					1	2	Cat IV	1	2	2	9	NEGATIVE						5	KHAMBHAT	42	3	16.0037	162		NA	NA	43	42	0.8	0.7	1.2	8	9	7	2001	GOVERNMENT	CAT3,CAT2 SIX TIME	1	46	0
3	2	398	2010	0	53	AMC	5	8	3					1	1	Cat IV	4	4	4	4	NEGATIVE						4	LGH HOSPITAL	55	4	22.8928	155		NA	NA			0.5			0	0	1			CONTECT PERSONE	2		1
3	2	399	2010	1	45	PAT	2	6	3					1	1	Cat IV	2	1	1	9	NEGATIVE						10	DTC PATAN	50	4	18.3655	165		NA	NA	51	52	0.9	0.8	0.7	7	0	4	2005	GOVERNMENT	HRZE,CAT2 THRICE	1	29	0
3	2	400	2010	0	35	BAN	2	5	3					1	1	Cat IV	9	2	1	9	NEGATIVE						2	DTC PALANPUR	40	3	15.2416	162		NA	NA	42		0.8			0	0	2	2008	GOVERNMENT	HRZE,CAT2	2	14	0
3	2	401	2010	0	22	BVN	2	7	1	1	1	1	1			Cat IV	9	2	9	9	NEGATIVE						9	DTC BHAVNAGAR	30	2	12.3274	156		NA	NA	33	36	0.6	0.6	0.7	0	0	2	2009	GOVERNMENT	CAT1,CAT2	2	10	0
3	2	402	2010	0	26	AMC	2	7	3					1	1	Cat IV	2	2	2	9	NEGATIVE						10	WEST ZONE	40	3	16.8663	154		NA	NA	42	45	0.7	0.7	0.5	0	0	2	2007	GOVERNMENT	HRZE,CAT2	2	32	0
3	2	403	2010	0	21	AMC	2	7	3					1	1	Cat IV	2	2	1	9	NEGATIVE						9	CHANDLODIA	30	2	12.1709	157		NA	NA	34	38	0.6			0	0	5	2006	GOVERNMENT	HRZES,HRZE THRAISE,CAT 2	1	46	0
3	2	404	2010	0	20	AMC	1	1	3					1	1	Cat IV	1	2	2	9	NEGATIVE						10	SCL HOSPITAL	41	3	16.4237	158		NA	NA	41	41	0.7			0	0	1	2010	GOVERNMENT	CAT 1	2	5	0
3	2	405	2010	1	30	BVN	2	9	1	1	1	1	1			Cat IV	1	2	1	9	NEGATIVE						9	MAHUVA	57	4	21.7192	162		NA	NA	58	58	1	0.9		0	0	1	2010	GOVERNMENT	CAT1	2	5	0
3	2	407	2010	0	18	RJT	2	7	1	1	1	1	1			Cat IV	9	2	2	9	NEGATIVE						10	KOTDA	27	2	11.6863	152		NA	NA	29	32	0.8	0.6		0	0	2	2009	GOVERNMENT	CAT1,CAT2	2	11	0
3	2	408	2010	1	30	MSN	2	7	3					1	2	Cat IV	2	2	2	9	NEGATIVE						5	VISNAGAR	70	5	30.2978	152		NA	NA	75	72	0.6		0.8	0	0	2	2009	GOVERNMENT	HRZE,CAT2	2	20	0
3	2	409	2010	0	43	BAN	2	7	1	1	1	1	1			Cat IV	1	1	3	3	NEGATIVE						2	DTC PALANPUR	33	2	13.219	158		NA	NA			0.6			0	0	2	2007	GOVERNMENT	HRZE,CAT2	2	9	0
3	2	410	2010	1	48	MSN	2	5	3					1	2	Cat IV	2	2	9	9	NEGATIVE						4	VISNAGAR	51	4	18.7328	165		NA	NA	51	52	1			0	0	3	2007	GOVERNMENT	HRZE,CAT2 TWICE	1	16	0
3	2	411	2010	1	38	BVN	2	9	1	1	1	1	1			Cat IV	2	2	2	9	NEGATIVE						5	SHIHOR	54	4	19.5965	166		NA	NA	56	58	0.8	0.7	0.6	0	0	4	2006	PRIVATE	CAT1,.CAT2	2	29	0
3	2	412	2010	1	35	AMC	2	5	3					1	1	Cat IV	2	2	2	9	NEGATIVE						7	SOUTH ZONE	45	4	17.5781	160		NA	NA	47	46	1			0	0	2	2008	GOVERNMENT	CAT 2 TWISE	1	14	0
3	2	413	2010	1	55	AMC	2	7	3					1	1	Cat IV	1	9	3	3	NEGATIVE						10	SCL HOSPITAL	37	3	14.0985	162		NA	NA	39		0.7			0	0	2	2008	GOVERNMENT	HRZE,CAT2	2	22	0
3	2	414	2010	1	21	AMC	2	5	3					1	2	Cat IV	4	4	4	4	NEGATIVE						10	CENTRAL ZONE	37	3	13.7567	164		NA	NA	37		0.9	0.8		0	0	3	2008	GOVERNMENT	CAT 1,CAT 2 TWISE	1	19	0
3	2	1	2011	0	27	AND	2	5	3					1	1	Cat IV	9	2	2	9	NEGATIVE						5	SARSA	38	3	14.8438	160		NA	NA	39	39	0.5	0.5	0.5	0	0	2	2008	GOVERNMENT	HRZE,CAT2	2	27	0
3	2	2	2011	1	22	AMC	3	5	3					1	1	Cat IV	2	9	2	9	NEGATIVE						10	SCL HOSPITAL	49	4	18.6709	162		NA	NA	52	52	0.6	0.7	0.8	0	0	1	2010	GOVERNMENT	CAT III	2	6	0
3	2	3	2011	1	50	AMC	2	5	3					1	2	Cat IV	2	2	2	9	NEGATIVE						9	MEMNAGAR	45	4	16.1354	167		NA	NA	49	49	0.8	0.8	0.9	0	23	3	2008	GOVERNMENT	HRZE,CAT2 TWICE	1	16	0
3	2	4	2011	0	28	AMC	1	3	3					1	1	Cat IV	2	2	2	9	NEGATIVE						10	EAST ZONE	38	3	16.0229	154		NA	NA	35	36	0.7	0.5	0.7	0	0	1	2010	GOVERNMENT	CAT1	2	6	0
3	2	5	2011	0	37	AMD	1	1	3					1	1	Cat IV	2	2	2	9	NEGATIVE						1	VIRAMGAM	49	4	20.1348	156		NA	NA			0.6	0.9		0	0	1	2010	GOVERNMENT	CAT1	2	5	0
3	2	6	2011	0	42	KDA	1	1	3					1	1	Cat IV	2	2	2	9	NEGATIVE						9	NADIAD	45	4	18.7305	155		NA	NA	48	49	0.7	0.6	0.4	5	1	1	2010	GOVERNMENT	CAT1	2	7	0
3	2	7	2011	1	37	PAT	2	7	3					1	1	Cat IV	2	2	1	9	NEGATIVE						2	DTC PATAN	40	3	14.1723	168		NA	NA	43	40	0.9	0.8		0	0	2	1999	GOVERNMENT	CAT2	2	21	0
3	2	8	2011	1	26	BAN	1	1	3					1	2	Cat IV	2	2	2	9	NEGATIVE						5	DIYODAR	49	4	16.955	170		NA	NA			0.4			0	0	1	2010	GOVERNMENT	CAT1	2	6	0
3	2	9	2011	1	18	PAT	1	6	3					1	1	Cat IV	2	9	9	9	NEGATIVE						5	RADHANPUR	37	3	12.2209	174		NA	NA	40	39	0.6	1.3		74	85	1	2010	GOVERNMENT	CAT1	2	6	0
3	2	10	2011	1	45	AMD	2	6	1	1	1	1	1			Cat IV	2	3	3	3	NEGATIVE						2	DHANDHUKA	31	2	11.3866	165		NA	NA	30		0.8			6	0	1	2010	PRIVATE	RIFAMPICIN	2	12	0
3	2	11	2011	1	25	GNR	2	5	3					1	2	Cat IV	3	3	3	3	NEGATIVE						5	MANSA	39	3	14.3251	165		NA	NA			0.4	0.9		2	0	3	2005	GOVERNMENT	CAT1,CAT2 TWISE	1	22	0
3	2	12	2011	1	30	BAN	2	5	3					1	1	Cat IV	3	3	3	3	NEGATIVE						1	DTC PALANPUR	30	2	11.7188	160		NA	NA			0.4			7	1	2	2009	GOVERNMENT	CAT2	2	12	0
3	2	13	2011	1	19	AMC	2	5	3					1	1	Cat IV	2	2	2	9	NEGATIVE						4	EAST ZONE	44	3	17.1875	160		NA	NA	48	43	0.5	0.8		9	2	2	2010	GOVERNMENT	CAT2	2	7	0
3	2	14	2011	0	45	AMC	2	5	3					1	2	Cat IV	2	2	2	9	NEGATIVE						10	SCL HOSPITAL	35	3	13.8444	159	11/25/2011	BEHAVIER CHANGE	CS STOP	37	39	0.7	0.7	0.9	0	0	3	2005	GOVERNMENT	HRZE,CAT2 TWICE	1	19	0
3	2	15	2011	1	49	AMC	2	7	3					1	1	Cat IV	1	1	1	9	NEGATIVE						10	SCL HOSPITAL	35	3	13.3364	162	11/29/2011	ADR	ETHIO STOP	36	32	0.7	0.6	0.6	79	0	3	2000	GOVERNMENT	CAT1,CAT2 TWICE	1	18	0
3	2	16	2011	0	40	AMC	2	4	3					1	2	Cat IV	9	2	3	3	NEGATIVE						10	SOUTH ZONE	25	2	10.2728	156		NA	NA	32	32	0.8		0.6	0	0	2	2008	GOVERNMENT	CAT1,CAT2	2	14	0
3	2	17	2011	1	19	SRN	2	5	3					1	1	Cat IV	2	2	4	4	NEGATIVE						3	DTC SURENDRANAGAR	45	4	17.3604	161		NA	NA	47		0.7	0.9		0	0	2	2009	GOVERNMENT	CAT1,CAT2	2	15	0
3	2	18	2011	1	50	MSN	2	7	3					1	2	Cat IV	1	1	3	3	NEGATIVE						3	DTC MEHSANA	37	3	14.0985	162		NA	NA	37	38	1.2	0.8	0.1	21	0	2	2010	GOVERNMENT	HRZE,CAT2	2	13	0
3	2	19	2011	1	20	AMC	2	7	3					1	1	Cat IV	2	2	2	9	NEGATIVE						10	CHANDLODIA	40	3	15.2416	162		NA	NA	41	41	0.9			0	0	4	2009	GOVERNMENT	HRZE THRICE, CAT2	1	18	0
3	2	20	2011	1	29	AMC	2	7	1	1	1	1	1			Cat IV	9	2	9	9	NEGATIVE						10	CHANDLODIA	38	3	15.2219	158		NA	NA	39	39	0.7			0	0	2	2007	GOVERNMENT	CAT1,CAT2	2	10	0
3	2	21	2011	0	18	PAT	2	7	3					1	1	Cat IV	1	1	1	9	NEGATIVE						3	DTC PALANPUR	26	2	10.415	158		NA	NA	27	28	0.5	0.7	0.8	0	32	2	2009	GOVERNMENT	HRZE,CAT2	2	9	0
3	2	22	2011	1	71	AMC	1	1	3					1	1	Cat IV	2	2	2	9	NEGATIVE						10	CHANDLODIA	44	3	16.3593	164		NA	NA	44	44	1.4			0	0	1	2010	GOVERNMENT	CAT1	2	6	1
3	2	23	2011	1	52	GNR	8	9	3					1	2	Cat IV	2	2	1	9	NEGATIVE						5	DTC GANDHINAGAR	47	4	16.6525	168	1/25/2011	JOINT PAIN	PZ STOP	50	53	0.8	0.8		140	0	1	2009	PRIVATE	HRZE	2	24	0
3	2	24	2011	1	47	KDA	2	7	3					1	2	Cat IV	1	3	3	3	NEGATIVE						9	NADIAD	45	4	16.7311	164		NA	NA	44	41	0.7	0.8		150	0	2	2009	GOVERNMENT	HRZE,CAT2	2	7	0
3	2	25	2011	1	40	BAN	2	6	1	1	1	2	1			Cat IV	1	9	3	3	NEGATIVE						1	DIYODAR	43	3	15.9875	164		NA	NA						30	0	3	2004	GOVERNMENT	CAT1,CAT2 TWICE	1	19	0
3	2	26	2011	0	26	BAN	2	5	3					1	1	Cat IV	2	2	1	9	NEGATIVE						5	THARAD	36	3	14.0625	160		NA	NA			0.7			0	0	2	2008	GOVERNMENT	CAT1,CAT2	2	14	0
3	2	27	2011	1	50	RJT	2	6	1	1	1	1	1			Cat IV	2	2	2	9	NEGATIVE						9	DTC RAJKOT	54	4	18.6851	170		NA	NA	57	59	1	0.8	0.7	13	0	3	2004	GOVERNMENT	CAT1,CAT2 TWISE	1	19	0
3	2	28	2011	0	23	AMC	1	1	1	1	1	2	2			Cat IV	1	1	1	9	NEGATIVE						9	AMRAIWADI	28	2	12.1191	152		NA	NA	29	27	0.8			0	0	1	2009	GOVERNMENT	CAT1	2	5	0
3	2	29	2011	1	50	BAN	2	5	1	1	1	1	1			Cat IV	1	3	3	3	NEGATIVE						5	DIYODAR	34	2	13.6196	158		NA	NA			0.8			2	0	2	2009	GOVERNMENT	CAT2 TWISE	1	12	0
3	2	30	2011	1	31	MSN	2	6	3					1	2	Cat IV	2	9	9	9	NEGATIVE						5	DTC MEHSANA	59	4	21.6713	165		NA	NA	59	60	1		1.2	0	0	3	2006	GOVERNMENT	CAT1,CAT2 TWICE	1	22	0
3	2	31	2011	1	40	KDA	2	6	3					1	2	Cat IV	2	2	2	9	NEGATIVE						9	BALASINOR	49	4	18.6709	162		NA	NA	47	47	1	1	1	5	0	3	2009	GOVERNMENT	HRZE,CAT2 TWICE	1	18	0
3	2	32	2011	1	20	AND	1	1	3					1	2	Cat IV	3	3	3	3	NEGATIVE						5	DTC PETLAD	32	2	13.1492	156		NA	NA	32		0.8			50	0	1	2010	GOVERNMENT	CAT1	2	5	0
3	2	33	2011	0	47	SBK	2	5	3					1	1	Cat IV	1	2	1	9	NEGATIVE						5	DTC HIMMATNAGAR	40	3	16.8663	154	2011-11-08	HEARING LOSS	KM STOP	40	36	0.5	1		0	0	2	2009	GOVERNMENT	HRZE,CAT2	2	10	0
3	2	34	2011	1	50	AMC	1	1	3					1	1	Cat IV	2	2	2	9	NEGATIVE						10	EAST ZONE	67	5	25.5296	162	2011-05-07	ADR	KM,CS STOP	68	65	1	0.7	0.7	2	0	1	2010	GOVERNMENT	CAT1	2	6	1
3	2	35	2011	1	47	AMC	1	1	3					1	1	Cat IV	2	4	4	4	NEGATIVE						4	WEST ZONE	40	3	14.0051	169		NA	NA	44		0.9	0.9		7	0	1	2009	GOVERNMENT	CAT1	2	6	0
3	2	36	2011	1	22	KDA	2	7	3					1	1	Cat IV	1	1	3	3	NEGATIVE						9	MAHUDHA	45	4	16.937	163		NA	NA	42	40	0.8	0.8	0.9	14	0	3	2008	GOVERNMENT	CAT1,CAT2 TWICE	1	17	0
3	2	37	2011	0	18	AMC	2	5	3					1	1	Cat IV	1	1	1	9	NEGATIVE						9	EAST ZONE	25	2	9.88885	159		NA	NA	26	27	0.8	0.5		22	0	2	2009	GOVERNMENT	CAT III,CAT2	2	10	0
3	2	38	2011	1	22	BVN	2	5	1	1	1	1	1			Cat IV	2	2	2	9	NEGATIVE						5	DTC BHAVNAGAR	39	3	14.6788	163		NA	NA			1.2			0	0	4	2006	GOVERNMENT	HRZE2,CAT2 TWISE	1	28	0
3	2	39	2011	1	20	AMC	2	7	3					1	1	Cat IV	2	1	2	9	NEGATIVE						10	SOUTH ZONE	63	4	23.4236	164		NA	NA	63	66	0.9			27	0	2	2002	GOVERNMENT	CAT 2 TWISE	1	12	0
3	2	40	2011	1	31	AMC	1	1	3					1	1	Cat IV	2	2	2	9	NEGATIVE						9	AMRAIWADI	43	3	14.8789	170		NA	NA	43	43	0.6			0	0	1	2010	GOVERNMENT	CAT 1 TWISE	2	5	0
3	2	41	2011	1	65	AMD	2	7	3					1	2	Cat IV	2	2	2	9	NEGATIVE						1	DHANDHUKA	60	4	19.8177	174		NA	NA	69	69	1			0	0	2	2009	GOVERNMENT	CAT1,CAT2	2	14	1
3	2	42	2011	1	45	AMC	2	7	3					1	2	Cat IV	2	9	1	9	NEGATIVE						9	MEMNAGAR	34	2	12.3385	166		NA	NA	36		0.6	1	0.6	40	0	2	2005	GOVERNMENT	HRZE,CAT2	2	6	0
3	2	43	2011	1	52	AML	2	5	1	1	1	1	1			Cat IV	2	2	1	9	NEGATIVE						5	BABRA	49	4	17.3611	168		NA	NA	50	50	0.9	1	1	22	0	4	2006	GOVERNMENT	CAT2 FOUR TIMES	2	27	0
3	2	44	2011	1	16	AMC	1	1	3					1	1	Cat IV	1	3	3	3	NEGATIVE						10	AMRAIWADI	24	1	9.86193	156		NA	CS STOP	24		0.6			0	0	1	2011	GOVERNMENT	CAT1	2	4	0
3	2	45	2011	1	55	RJT	2	6	1	1	1	1	1			Cat IV	4	4	4	4	NEGATIVE						3	DTC RAJKOT	51	4	19.433	162		NA	NA			0.9			148	0	4	2008	GOVERNMENT	HRZE,CAT III THRICE	1	22	0
3	2	46	2011	1	26	AMC	1	1	3					1	1	Cat IV	4	4	4	4	NEGATIVE						10	WEST ZONE	43	3	16.3847	162		NA	NA			0.8			36	0	1	2010	GOVERNMENT	CAT 1	2	6	0
3	2	47	2011	0	50	RJT	2	5	1	1	2	1	1			Cat IV	2	2	2	9	NEGATIVE						9	UPLETA	30	2	12.0173	158		NA	NA	44		0.7	0.7		0	0	2	2001	GOVERNMENT	HRZE,CAT2	2	16	0
3	2	48	2011	0	25	AMC	2	7	3					1	1	Cat IV	2	2	2	9	NEGATIVE						10	SOUTH ZONE	40	3	16.0231	158		NA	NA	41	40	0.6	0.7		4	0	3	2009	GOVERNMENT	CAT 1,HRZE,CAT 2	2	16	0
3	2	49	2011	1	25	AMC	2	7	3					1	1	Cat IV	4	4	4	4	NEGATIVE						10	MEMNAGAR	47	4	17.2635	165		NA	NA			0.5					3	2009	GOVERNMENT	AKT IV,CAT 2 TWISE	1	15	0
3	2	50	2011	0	30	AMC	2	7	3					1	1	Cat IV	2	2	2	9	NEGATIVE						10	CENTRAL ZONE	35	3	15.1489	152		NA	NA	36		0.5			0	0	2	1998	GOVERNMENT	HRZE,CAT2	2	7	0
3	2	51	2011	1	40	AMC	1	1	1	1	1	1	1			Cat IV	2	2	2	9	NEGATIVE						10	EAST ZONE	45	4	18.026	158		NA	NA	46	47	0.6	0.7	0.8	0	0	1	2010	GOVERNMENT	CAT1	2	5	0
3	2	52	2011	1	25	AMC	2	6	3					1	1	Cat IV	2	2	2	9	NEGATIVE						9	SCL HOSPITAL	41	3	16.2177	159		NA	NA	42	41	0.4	0.8	0.7	2	0	3	2007	GOVERNMENT	HRZE,CAT2 TWICE	1	18	0
3	2	53	2011	0	45	AMC	2	5	3					1	1	Cat IV	2	2	2	9	NEGATIVE						10	NORTH CENTRAL	41	3	15.6226	162		NA	NA	41	45	0.8			0	0	3	2003	GOVERNMENT	CAT1,CAT2 TWICE	1	16	0
3	2	54	2011	1	24	AMC	1	1	3					1	1	Cat IV	2	3	3	3	NEGATIVE						10	CENTRAL ZONE	37	3	13.7567	164		NA	NA	37		0.7			110	0	1	2010	GOVERNMENT	CAT1	2	5	0
3	2	55	2011	1	60	AMC	1	1	3					1	1	Cat IV	2	2	2	9	NEGATIVE						10	CENTRAL ZONE	63	4	23.1405	165		NA	NA	63		1.2			0	0	1	2010	GOVERNMENT	CAT1	2	5	0
3	2	56	2011	1	24	BVN	2	7	1	1	1	1	1			Cat IV	2	2	2	9	NEGATIVE						1	TALAJA	39	3	14.8605	162		NA	NA	38		0.6	0.9		0	0	2	2008	GOVERNMENT	HRZE,CAT2	2	9	0
3	2	57	2011	1	47	AMC	2	6	3					1	1	Cat IV	2	9	2	9	NEGATIVE						10	EAST ZONE	35	3	13.3364	162	3/22/2011	BEHAVIER CHANGE	CS STOP	35	40	0.7	0.6	0.7	0	0	6	2004	GOVERNMENT	CAT 1,CAT 2,ND1,AKT IV,ND1,CAT 2	1	45	0
3	2	58	2011	1	18	BAN	2	7	1	1	1	1	1			Cat IV	1	3	3	3	NEGATIVE						5	DIYODAR	43	3	15.6046	166		NA	NA			0.6			0	0	2	2009	GOVERNMENT	HRZE,CAT2	2	8	0
3	2	59	2011	1	40	AMC	2	7	1	1	1	1	1			Cat IV	4	4	4	4	NEGATIVE						10	WEST ZONE	70	5	26.3465	163		NA	NA			1.3			60	0	3	2007	GOVERNMENT	CAT1,HRZE,CAT2	2	9	1
3	2	60	2011	1	60	PAT	2	7	1	1	1	2	1			Cat IV	1	1	1	9	NEGATIVE						4	DTC PATAN	40	3	12.9132	176		NA	NA	44	45	0.7	0.9	0.8	0	0	4	2007	GOVERNMENT	CAT1,CAT2 THRICE	1	26	1
3	2	61	2011	1	58	AMC	2	5	3					1	1	Cat IV	2	3	3	3	NEGATIVE						6	EAST ZONE	50	4	18.8189	163		NA	NA	46		2			35	0	7	1999	GOVERNMENT	NTP,CAT2 THRAISE,ND1,CAT 2 TWISE	1	58	0
3	2	62	2011	1	60	AMC	2	5	1	1	1	1	1			Cat IV	2	9	4	4	NEGATIVE						9	EAST ZONE	45	4	16.937	163		NA	NA	40	40	0.9	0.9		97	0	2	2003	GOVERNMENT	CAT1,CAT2	2	11	0
3	2	63	2011	0	15	BVN	2	7	1	1	1	1	1			Cat IV	3	3	3	3	NEGATIVE						5	DTC BHAVNAGAR	30	2	13.3333	150		NA	NA			0.4			0	0	2	2010	GOVERNMENT	SHRZE,CAT2	2	6	0
3	2	64	2011	1	30	BAN	1	1	3					1	1	Cat IV	9	2	9	9	NEGATIVE						2	DANTA	39	3	14.3251	165		NA	NA			0.7			0	0	1	2010	GOVERNMENT	CAT1	2	5	0
3	2	65	2011	0	40	MSN	2	7	3					1	1	Cat IV	4	4	4	4	NEGATIVE						5	KHERALU	34	2	13.2813	160		NA	NA			0.7			60	0	2	2009	GOVERNMENT	HRZE,CAT2	2	8	0
3	2	66	2011	1	30	AMD	1	1	1	1	1	1	1			Cat IV	4	4	4	4	NEGATIVE						2	VIRAMGAM	40	3	15.8222	159		NA	NA			0.6			14	0				NA	2		0
3	2	67	2011	1	25	AMC	2	7	3					1	1	Cat IV	2	2	2	9	NEGATIVE						5	CHANDLODIA	52	4	18.8707	166		NA	NA	52		0.9			0	0	3	2009	GOVERNMENT	CAT 1,CAT 2 TWISE	1	13	0
3	2	68	2011	1	50	BAN	2	7	3					1	1	Cat IV	2	2	2	9	NEGATIVE						2	DANTA	39	3	14.3251	165		NA	NA			0.7			0	0	2	2009	GOVERNMENT	HRZE,CAT2	2	4	0
3	2	69	2011	1	20	KDA	2	5	3					1	1	Cat IV	2	2	2	9	NEGATIVE						9	NADIAD	50	4	18.5901	164		NA	NA	60	57	0.5	0.1	0.8	0	0	2	2009	GOVERNMENT	CAT2 TWICE	1	16	0
3	2	70	2011	1	25	MSN	2	7	3					1	1	Cat IV	4	4	4	4	NEGATIVE						5	KADI	30	2	12.9848	152		NA	NA			0.6			33	0	2	2010	GOVERNMENT	CAT2	2	5	0
3	2	71	2011	1	51	KDA	2	5	3					1	2	Cat IV	2	2	2	9	NEGATIVE						5	MAHUDHA	44	3	15.9675	166		NA	NA	45	45	1	0.8	1	9	0	3	2008	GOVERNMENT	HRZE,CAT2 TWICE	1	19	0
3	2	72	2011	0	20	RJT	1	1	1	1	1	2	1			Cat IV	1	2	1	9	NEGATIVE						9	PK HOSPITAL	42	3	17.2584	156		NA	NA	46	48	0.5	0.7	0.7	0	0	1	2010	GOVERNMENT	CAT1	2	5	0
3	2	73	2011	0	20	SBK	1	1	3					1	1	Cat IV	3	3	3	3	NEGATIVE						2	DTC HIMMATNAGAR	23	1	10.2222	150		NA	NA	23		0.5			53	0	1	2010	GOVERNMENT	CAT1	2	5	0
3	2	74	2011	0	20	AMC	9	9	3					1	1	Cat IV	2	9	1	9	NEGATIVE						10	EAST ZONE	30	2	12.9848	152		NA	NA	31	31	0.5	0.8		0	0	4	2006	GOVERNMENT	CAT1,HRZE,KENA THRICE	1	26	0
3	2	75	2011	1	23	BVN	2	5	1	1	1	1	1			Cat IV	9	2	2	9	NEGATIVE						5	PALITANA	44	3	16.7657	162		NA	NA	47		0.7	0.1	0.1	0	0	2	2008	GOVERNMENT	CAT2 TWICE	1	14	0
3	2	76	2011	0	27	GNR	1	1	3					1	1	Cat IV	2	2	1	9	NEGATIVE						9	DTC GANDHINAGAR	40	3	17.313	152		NA	NA	45		0.5	0.9		0	11	1	2010	GOVERNMENT	CAT1	2	5	0
3	2	77	2011	1	38	KDA	2	6	3					1	1	Cat IV	2	2	2	9	NEGATIVE						9	NADIAD	41	3	16.4237	158		NA	NA	43	43	0.7	1	0.6	33	4	4	2007	GOVERNMENT	CAT1,CAT2 THRICE	1	26	0
3	2	78	2011	1	25	SRN	2	6	3					1	1	Cat IV	2	2	2	9	NEGATIVE						10	MULI	44	3	17.4044	159		NA	NA	46		0.8	0.7		0	0	2	2009	GOVERNMENT	HRZE,CAT2	2	10	0
3	2	79	2011	1	24	AMC	2	7	3					1	1	Cat IV	2	1	3	3	NEGATIVE						10	CENTRAL ZONE	40	3	15.2416	162		NA	NA	40		0.5			0	0	2	2008	GOVERNMENT	HRZE,CAT2	2	12	0
3	2	80	2011	1	32	BVN	2	6	1	1	1	1	1			Cat IV	1	1	3	3	NEGATIVE						2	DTC BHAVNAGAR	32	2	12.1933	162		NA	NA	34		0.8	0.9		0	0	4	2005	GOVERNMENT	CAT1,HRZE,CAT2 TWICE	1	29	0
3	2	81	2011	1	50	AMC	2	6	3					1	1	Cat IV	9	9	9	9	NEGATIVE						10	AMRAIWADI	37	3	14.8213	158		NA	NA	37		0.7			43	0	4	2006	GOVERNMENT	HRZE,CAT2 TWICE	1	20	0
3	2	82	2011	1	22	GNR	2	7	3					1	2	Cat IV	1	1	2	9	NEGATIVE						5	MANSA	32	2	12.8185	158		NA	NA	33	36	0.9	0.9		47	0	2	2008	GOVERNMENT	CAT2 TWICE	1	9	0
3	2	83	2011	1	20	AMC	5	8	3					1	1	Cat IV	2	2	2	9	NEGATIVE						9	CENTRAL ZONE	60	4	22.0386	165		NA	NA	60		0.5			0	0	0			CONTACT PERSONE	2		0
3	2	84	2011	1	50	BVN	2	7	1	1	1	1	1			Cat IV	1	4	4	4	NEGATIVE						5	SHIHOR	39	3	13.655	169		NA	NA	39		1.3	0.9		64	0	4	2007	GOVERNMENT	CAT1,CAT2 TWICE,HRZE	1	14	0
3	2	85	2011	1	50	RJT	2	7	1	1	1	2	1			Cat IV	2	1	1	9	NEGATIVE						9	MORBI	55	4	20.9572	162		NA	NA	57		0.8	0.9	1	9	0	3	2008	GOVERNMENT	HRZE,CAT2 TWICE	1	11	0
3	2	86	2011	1	24	AMC	2	4	3					1	1	Cat IV	3	3	3	3	NEGATIVE						9	SCL HOSPITAL	64	4	23.7954	164		NA	NA			0.8			3	0	2	2008	GOVERNMENT	CAT1.CAT2	2	14	0
3	2	87	2011	0	45	AMC	2	7	3					1	1	Cat IV	2	9	9	9	NEGATIVE						10	WEST ZONE	58	4	25.1039	152		NA	NA	58		0.9	0.8		0	2	4	1985	GOVERNMENT	HRZE,CAT2	2	32	1
3	2	88	2011	0	21	AMC	1	6	3					1	1	Cat IV	2	1	9	9	NEGATIVE						10	LGH HOSPITAL	24	1	10.9569	148		NA	NA	26	30	0.6			0	0	1	2010	GOVERNMENT	CAT 2	2	7	0
3	2	89	2011	1	35	AMD	2	5	1	1	1	2	2			Cat IV	9	2	1	9	NEGATIVE						10	VIRAMGAM	36	3	13.2231	165		NA	NA	38	38	0.7	0.7		3	73	2	2010	GOVERNMENT	AKT4,CAT2	2	7	0
3	2	90	2011	1	38	AMD	2	6	3					1	2	Cat IV	2	1	1	9	NEGATIVE						5	BAVLA	50	4	21.6413	152		NA	NA	51		0.8			4	0	3	2006	GOVERNMENT	CAT1,CAT2 TWICE	1	21	0
3	2	91	2011	1	40	SRN	2	6	1	1	1	1	1			Cat IV	2	2	1	9	NEGATIVE						10	DTC SURENDRANAGAR	39	3	14.8605	162		NA	NA	40		1	0.9		0	0	4	2008	GOVERNMENT	HRZE,CAT2 TWISE	1	18	0
3	2	92	2011	1	55	AMD	2	6	3					1	2	Cat IV	2	2	2	9	NEGATIVE						1	DHANDHUKA	25	2	9.18274	165		NA	NA	27		0.6			5	0	2	2007	GOVERNMENT	HRZE,CAT2	2	11	0
3	2	93	2011	0	32	PAT	2	5	3					1	1	Cat IV	1	1	1	9	NEGATIVE						9	DTC PATAN	45	4	18.026	158		NA	NA	47	44	0.8	0.8	0.7	0	0	3	2006	GOVERNMENT	CAT1,HRZE,CAT2	2	27	0
3	2	94	2011	1	34	PAT	2	7	3					1	1	Cat IV	1	2	1	9	NEGATIVE						10	DTC PATAN	36	3	13.2231	165		NA	NA	38		0.6	0.6	0.9	15	2				NA	2		0
3	2	95	2011	0	45	AMC	9	9	3					1	2	Cat IV	1	1	1	9	NEGATIVE						10	LGH HOSPITAL	45	4	17.7999	159		NA	NA	35	35	0.8			9	0	4		PRIVATE	HRZE,AMIKACIN,OFLOX,ETHIO,	2	39	0
3	2	96	2011	0	47	BVN	2	5	1	1	1	2	1			Cat IV	2	2	2	9	NEGATIVE						5	DTC BHAVNAGAR	57	4	22.8329	158		NA	NA	57		0.8	0.8	0.6	0	0	2	2008	GOVERNMENT	CAT1,CAT2	2	14	1
3	2	97	2011	0	35	AMC	2	7	1	1	1	2	2			Cat IV	9	9	2	9	NEGATIVE						9	EAST ZONE	42	3	16.8242	158	3/22/2011	ADR	ETHIO STOP	42	44	0.2	0.6	0.6	31	0	1	2010	GOVERNMENT	CAT2	2	4	0
3	2	98	2011	0	30	BVN	2	6	1	1	1	2	1			Cat IV	2	2	2	9	NEGATIVE						5	DTC BHAVNAGAR	36	3	16	150		NA	NA	38		0.7	0.5		0	0	3	2008	GOVERNMENT	CAT1,CAT2 TWICE	1	17	0
3	2	99	2011	1	32	BVN	2	5	1	1	1	1	1			Cat IV	9	2	9	9	NEGATIVE						5	TALAJA	25	2	10.5414	154		NA	NA	28		0.8	0.7		0	0	2	2007	GOVERNMENT	CAT1,CAT2	2	11	0
3	2	100	2011	0	40	AND	1	1	3					1	1	Cat IV	2	2	9	9	NEGATIVE						5	ANKLAV	39	3	16.8802	152		NA	NA	39	44	0.9	1.2	0.8	37	8	1	2010	GOVERNMENT	CAT1	2	6	0
3	2	101	2011	1	32	AMD	2	6	3					1	1	Cat IV	2	2	9	9	NEGATIVE						1	VIRAMGAM	52	4	21.3675	156		NA	NA	52		0.5			17	0	3	2009	GOVERNMENT	AKT4,CAT2 TWISE	1	14	0
3	2	102	2011	1	24	AMC	2	6	3					1	2	Cat IV	2	2	9	9	NEGATIVE						9	SOUTH ZONE	47	4	17.0562	166		NA	NA	48		0.8	0.3		21	0	2	2009	GOVERNMENT	HRZE,CAT2	2	14	0
3	2	103	2011	1	30	GNR	2	5	1	1	1	1	1			Cat IV	2	2	2	9	NEGATIVE						9	MANSA	36	3	13.7174	162	2011-10-08	SUCIDE ATTEMPT	CS STOP	39	39	0.8	1		6	0	2	2008	GOVERNMENT	HRZE,CAT2	2	12	0
3	2	105	2011	0	60	AND	2	7	3					1	2	Cat IV	2	3	3	3	NEGATIVE						2	DTC PETLAD	23	1	9.45102	156	2011-06-07	ADR	KM STOP	30		0.8	1	0.3	85	0	2	2010	GOVERNMENT	CAT2	2	6	0
3	2	106	2011	1	40	MSN	9	7	3					1	1	Cat IV	4	4	4	4	NEGATIVE						5	DTC MEHSANA	40	3	14.6924	165		NA	NA			0.5			0	0	2	2008	GOVERNMENT	CAT2,CAT IV	2	22	0
7	3	1	2008	1	22	CAL	2	7	1	1	1	2	1			Cat IV	4	4	4	4	NEGATIVE						5	Tangra Chest Clinic	50	4	17.301	170		Not Given				0.7					3	2007	GOVERNMENT	CAT I, CAT II	2	12	0
7	3	1	2009	0	22	CAL	2	5	1	1	1	1	1			Cat IV	2	2	9	1	NEGATIVE	DUE TO INTERRUPTION TOOK A.T. FOR A LONGER PERIOD					4	Maniktala	50	4	16.901	172		Not Given		54	49	0.6	0.7	0.6	0	9	3	2002	GOVERNMENT	CAT I, CAT II	2	23	0
7	3	2	2009	0	50	CAL	2	5	1	1	1	2	1			Cat IV	2	2	9	1	NEGATIVE	DUE TO INTERRUPTION TOOK A.T. FOR A LONGER PERIOD					4	Maniktala	37	3	16.4444	150		Not Given		39	40	0.6	0.8	0.8	0	2	1	2007	GOVERNMENT	CAT II	2	9	1
7	3	3	2009	0	36	CAL	2	6	1	1	1	1	1			Cat IV	2	1	9	1	NEGATIVE						4	Sonarpur	47	4	17.9089	162		Not Given		50	50	0.7	0.6	0.7	0	18	2	2007	GOVERNMENT	CAT I, CAT II	2	15	0
7	3	4	2009	1	50	CAL	2	6	1	1	1	2	1			Cat IV	4	4	4	4	NEGATIVE						4	Tollygunge	53	4	19.4674	165		Not Given		49	54	0.8	0.7	0.7	3		4	2006	GOVERNMENT	CAT I, CAT II	2	26	0
7	3	5	2009	1	40	CAL	2	6	1	1	1	1	1			Cat IV	2	2	2	3	NEGATIVE						4	Tollygunge	53	4	19.4674	165		Not Given		49	54	0.8	0.7	0.7	3	0	3	2007	GOVERNMENT	CAT I, CAT II	2	22	0
7	3	6	2009	1	19	CAL	2	6	1	1	1	2	1			Cat IV	4	4	4	4	NEGATIVE						5	Tollygunge	43	3	16.7969	160		Not Given				0.6			0		3	2006	GOVERNMENT	CAT I, CAT II	2	23	0
7	3	7	2009	1	34	CAL	2	6	1	1	1	2	1			Cat IV	2	2	9	1	NEGATIVE	Sputum sent for 2nd line DST	5/23/2012				4	Tollygunge	43	3	14.0408	175		Not Given		45	55	0.7	0.7	0.7	1	74	3	2006	GOVERNMENT	CAT I, CAT II	2	23	0
7	3	8	2009	0	22	CAL	2	5	1	1	1	1	1			Cat IV	2	2	2	1	NEGATIVE	DUE TO INTERRUPTION TOOK A.T. FOR A LONGER PERIOD					4	Tangra Chest Clinic	30	2	13.6961	148		Not Given		32	36	0.6	0.6	0.6	0	0	3	2006	GOVERNMENT	CAT I, CAT II	2	22	0
7	3	9	2009	0	27	CAL	2	5	1	1	1	2	2			Cat IV	2	2	2	4	NEGATIVE	LAST SPUTUM SENT ON 19/5/2010 BUT PATIENT DID NOT TAKE ANY MEDICINE SINCE 8/3/2010					4	Alipore CC	54	4	19.3625	167		Not Given		54	54	0.7	0.8	0.6	0	28	3	2007	GOVERNMENT	CAT I, CAT II	2	18	0
7	3	10	2009	1	30	CAL	2	5	1	1	1	1	1			Cat IV	2	2	2	6	NEGATIVE						4	DTC KOLKATA	50	4	17.301	170		Not Given		51	52	0.7	0.8	0.6	0	0	2	2001	GOVERNMENT	CAT I, CAT II	2	13	1
7	3	11	2009	0	53	CAL	2	5	1	1	1	1	1			Cat IV	2	9	1	4	NEGATIVE						4	Alipore CC	59	4	23.0469	160		Not Given							200	0	2	2008	GOVERNMENT	CAT I, CAT II	2	13	0
7	3	12	2009	1	21	CAL	2	5	1	1	1	1	2			Cat IV	2	2	2	1	NEGATIVE						4	Tangra Chest Clinic	43	3	15.2353	168		Not Given		47	47	0.7	0.6	0.8	0	0	3	2002	GOVERNMENT	CAT I, CAT II	2	19	0
7	3	13	2009	1	47	CAL	2	7	1	1	1	1	1			Cat IV	2	2	9	1	NEGATIVE						4	DTC KOLKATA	52	4	17.9931	170		Not Given		57	64	0.7	0.7	0.7	0	0	2	2008	GOVERNMENT	HRZE, CAT II	2	13	1
7	3	14	2009	0	30	CAL	2	6	1	1	1	1	1			Cat IV	2	2	2	1	NEGATIVE						4	Tollygunge	61	4	22.4059	165		Not Given		53	47	0.7	0.7	0.6	2	1	3	2005	GOVERNMENT	CAT I, CAT II	2	21	0
7	3	15	2009	0	47	CAL	2	6	1	1	1	1	1			Cat IV	2	2	3	3	NEGATIVE						4	Tollygunge	29	2	10.652	165		Not Given		30		0.8	0.8	0.7	7		3	2005	GOVERNMENT	CAT I, CAT II	2	24	0
7	3	16	2009	0	30	CAL	1	6	1	1	1	1	1			Cat IV	2	2	2	1	NEGATIVE						4	SBR TU	38	3	13.6254	167		Not Given		35	38	0.7	0.7	0.6	5	40	2	2007	GOVERNMENT	CAT I, CAT II	2	15	0
7	3	17	2009	0	40	CAL	2	7	1	1	1	1	1			Cat IV	3	3	3	3	NEGATIVE						4	Maniktala	30	2	10.3806	170		Not Given				0.8			4		4	2005	GOVERNMENT	AKT4, CAT I, HRE, CAT II	2	22	0
7	3	18	2009	1	18	CAL	2	5	1	1	1	1	1			Cat IV	2	9	2	1	NEGATIVE						4	Maniktala	40	3	14.6924	165		Not Given		41	44	0.6	0.7	0.7	1	0	4	2006	GOVERNMENT	CAT I, CAT II	2	23	0
7	3	19	2009	1	25	CAL	2	7	1	1	1	2	1			Cat IV	2	2	2	1	NEGATIVE						4	Tangra Chest Clinic	45	4	16.5289	165		Not Given		44	47	0.7	0.8	0.7	8	25	1	2008	GOVERNMENT	CAT II	2	24	0
7	3	20	2009	0	45	CAL	2	4	1	1	1	2	2			Cat IV	9	2	3	3	NEGATIVE						4	BORAL MTM	39	3	18.048	147		Not Given		38		0.7	0.7	0.6	1	0	4	2008	GOVERNMENT	CAT I, CAT II	2	10	0
7	3	21	2009	1	42	CAL	2	6	1	1	1	1	1			Cat IV	9	4	4	4	NEGATIVE						4	Maniktala	50	4	21.3593	153		Not Given				0.7	0.8		5		4	2008	GOVERNMENT	CAT I, CAT II	2	12	0
7	3	22	2009	1	55	CAL	2	5	1	1	1	2	2			Cat IV	2	2	2	4	NEGATIVE						4	Tollygunge	63	4	19.4444	180		Not Given		66	73	0.8	0.7	0.6	0	19	1	2008	GOVERNMENT	CAT II	2	8	1
7	3	23	2009	1	33	CAL	2	6	1	1	1	1	1			Cat IV	2	2	2	1	NEGATIVE						4	Tangra Chest Clinic	32	2	13.3195	155		Not Given		38	37	0.7	0.7	0.6			1	2007	GOVERNMENT	CAT I	2	14	0
7	3	24	2009	1	23	CAL	1	6	1	1	1	1	1			Cat IV	2	1	1	1	NEGATIVE	Sputum sent for 2nd line DST	2010-07-12				4	MANSATALA	51	4	20.1733	159		Not Given		60	69	0.6	0.6	1.3	5	0	2	2006	GOVERNMENT	CAT I, CAT II	2	18	0
7	3	25	2009	1	18	CAL	1	6	1	1	1	1	1			Cat IV	2	2	2	1	NEGATIVE						4	Tangra Chest Clinic	50	4	19.7777	159		Not Given		58	59	0.8	0.7	1.6	1	0	2	2008	GOVERNMENT	CAT I, CAT II	2	10	0
7	3	26	2009	0	45	CAL	1	6	1	1	1	2	1			Cat IV	2	2	2	1	NEGATIVE						4	Tangra Chest Clinic	44	3	18.3143	155		Not Given		42	46	0.7	0.6	0.7	1	0	2	2008	GOVERNMENT	CAT I, CAT II	2	13	0
7	3	27	2009	1	26	CAL	2	5	1	1	1	1	2			Cat IV	2	2	2	1	NEGATIVE						4	MANSATALA	50	4	19.5313	160		Not Given		54	53	0.7	0.6	1.8	2	0	3	2004	GOVERNMENT	CAT I, CAT II	2	24	0
7	3	28	2009	0	17	CAL	1	6	1	1	1	1	1			Cat IV	2	2	2	8	NEGATIVE						4	Bagbazar Chest Clinic	36	3	14.6051	157		Not Given		38	38	0.9	2.1	1.9	3	0	2	2008	GOVERNMENT	CAT I, CAT II	2	11	0
7	3	29	2009	1	16	CAL	1	6	1	1	1	1	1			Cat IV	2	2	9	8	NEGATIVE						4	DTC KOLKATA	50	4	19.7777	159		Not Given		56	60	0.6	1.5	0.8	0	0	2	2008	GOVERNMENT	CAT I, CAT II	2	16	0
7	3	30	2009	1	28	CAL	2	6	1	1	1	1	1			Cat IV	2	2	4	4	NEGATIVE						10	BAGHBAZAR	53	4	19.4674	165		Not Given		55		0.7	0.8		40		2	2008	GOVERNMENT	CAT I, CAT II	2	11	0
7	3	31	2009	0	26	CAL	2	5	1	1	1	1	1			Cat IV	2	2	1	4	NEGATIVE	Sputum sent for 2nd line DST	2010-07-12				10	DTC KOLKATA	55	4	22.8928	155		Not Given		47	42	1.2	1.5	1.5	2		3	2007	GOVERNMENT	CAT I, CAT II	2	18	0
7	3	32	2009	1	18	CAL	2	6	1	1	1	1	1			Cat IV	4	4	4	4	NEGATIVE						10	BAGHBAZAR	48	4	18.0662	163		Not Given				1.7			10		4	2008	GOVERNMENT	CAT I, CAT II	2	17	0
7	3	33	2009	0	35	CAL	2	6	1	1	1	1	1			Cat IV	2	2	2	1	NEGATIVE						4	MANSATALA	52	4	22.2137	153		Not Given		45	45	0.8	1.4	1	0	0	3	2006	GOVERNMENT	CAT I, CAT II	2	24	0
7	3	34	2009	1	18	CAL	1	6	1	1	1	1	1			Cat IV	2	2	3	3	NEGATIVE						4	SBR TU	34	2	15.1111	150		Not Given		36	38	1.3	0.9	0.9	0	0	1	2008	GOVERNMENT	CAT I	2	5	0
7	3	35	2009	0	17	CAL	2	5	1	1	1	1	1			Cat IV	2	2	2	1	NEGATIVE						4	MANSATALA	58	4	23.2335	158		Not Given		57	62	1.9	1.1	1	0	0	3	2006	GOVERNMENT	CAT I, CAT II	2	22	0
7	3	36	2009	0	20	CAL	2	6	1	1	1	1	1			Cat IV	2	2	2	1	NEGATIVE						4	MANSATALA	42	3	17.4818	155		Not Given		39	41	1.5	0.6	0.5	0	0	2	2008	GOVERNMENT	CAT III, CAT II	2	12	0
7	3	37	2009	1	25	CAL	2	6	1	1	1	1	1			Cat IV	2	2	2	1	NEGATIVE						1	Tollygunge	44	3	17.8506	157		Not Given		48	50	1.7	1.4	1.7	1	27	3	2008	GOVERNMENT	CAT I, CAT II	2	16	0
7	3	38	2009	1	52	CAL	2	7	1	1	1	1	1			Cat IV	2	4	4	4	NEGATIVE						10	Alipore CC	56	4	20.5693	165		Not Given		55		1.4	1.7		2		1	2007	GOVERNMENT	CAT II	2	9	1
7	3	39	2009	1	19	CAL	2	6	1	1	1	1	1			Cat IV	2	2	2	1	NEGATIVE						1	NODAKHALI	49	4	19.8791	157		Not Given		51	54	1.9	1.5	0.9	0	1	3	2007	GOVERNMENT	CAT I, CAT II	2	23	0
7	3	1	2010	1	22	CAL	2	6	1	1	1	1	1			CAT IV	2	2	2	1	NEGATIVE						4	Tollygunge	45	4	14.2028	178		Not Given		50	48	1	1.2	0.7	0	36	2	2008	GOVERNMENT	CAT I, CAT II	2	18	0
7	3	2	2010	1	30	CAL	2	6	1	1	1	1	1			CAT IV	2	2	2	1	NEGATIVE						4	Tollygunge	49	4	16	175		Not Given		50	52	1	1.1	0.7	0	0	4	2006	GOVERNMENT	CAT I, CAT II	2	15	0
7	3	3	2010	1	24	CAL	2	6	1	1	1	1	1			CAT IV	2	2	2	1	NEGATIVE						5	Tollygunge	62	4	19.5682	178		Not Given		70	70	1	1.8	0.6	0	0	3	2005	GOVERNMENT	CAT I, CAT II	2	15	0
7	3	4	2010	1	52	CAL	2	6	1	1	1	1	1			CAT IV	2	2	2	1	NEGATIVE						4	Tollygunge	52	4	20.3125	160		Not Given		48	44	1.2	1.2	0.9	0	0	3	2007	GOVERNMENT	CAT I, CAT II	2	21	0
7	3	5	2010	1	20	CAL	1	6	1	1	1	1	1			CAT IV	2	2	9	2	NEGATIVE						4	Tollygunge	54	4	25.6837	145		Not Given		49	49	1.1	1	0.8	0	0	3	2008	GOVERNMENT	CAT I, CAT II	2	18	0
7	3	6	2010	0	25	NPG	2	6	1	1	1	1	1			CAT IV	2	2	2	1	NEGATIVE						4	Habra	53	4	20.1951	162		Not Given		55	55	0.8	0.8	0.7	0	0	3	2007	GOVERNMENT	CAT I, CAT II	2	19	0
7	3	7	2010	0	26	CAL	2	7	1	1	1	1	1			CAT IV	1	1	1	6	NEGATIVE	Sputum sent for 2nd line DST	5/23/2012				11	Alipore CC	50	4	21.3593	153		Not Given		56	58	0.9	1	0.5	0	0	4	2004	GOVERNMENT	CAT I, CAT II	2	10	0
7	3	8	2010	0	16	CAL	1	6	1	1	1	1	1			CAT IV	2	2	1	1	NEGATIVE						11	Tollygunge	43	3	18.6115	152		Not Given		42	43	1.1	1.1	0.9	0	0	2	2008	GOVERNMENT	AKT-4, CAT II	2	15	0
7	3	9	2010	1	40	CAL	2	7	1	1	1	1	1			CAT IV	4	4	4	4	NEGATIVE						4	Tollygunge	38	3	15.0311	159		Not Given				1.5			0		1	2008	GOVERNMENT	CAT II	2	11	0
7	3	10	2010	1	25	NPG	2	6	1	1	1	2	1			CAT IV	2	2	2	1	NEGATIVE						4	Tollygunge	55	4	21.7555	159		Not Given		57	58	1.5	0.6	0.6	0	0	3	2008	GOVERNMENT	CAT I, CAT II	2	23	0
7	3	11	2010	1	48	CAL	2	6	1	1	1	1	1			CAT IV	2	2	2	1	NEGATIVE						11	Tollygunge	52	4	20.83	158		Not Given		53	52	1.6	0.7	0.5	0	0	3	2008	GOVERNMENT	CAT I, CAT II	2	17	0
7	3	12	2010	1	25	CAL	2	6	1	1	1	1	1			CAT IV	1	1	1	7	NEGATIVE		2010-07-12				5	Tollygunge	60	4	23.7332	159		Not Given		57	62	1.1	1.2	0.9	0	0	3	2007	GOVERNMENT	CAT I, CAT II, 2ND LINE ATD	2	20	0
7	3	13	2010	1	22	CAL	2	6	1	1	1	1	1			CAT IV	1	1	3	3	NEGATIVE		2010-07-12				4	Tollygunge	35	3	13.8444	159		Not Given		37		1.5	0.4	0.5	11	0	3	2007	GOVERNMENT	CAT I, CAT II	2	19	0
7	3	14	2010	1	24	CAL	2	7	1	1	1	2	1			CAT IV	1	1	4	4	NEGATIVE		2011-03-02				4	Alipore CC	44	3	17.4044	159		Not Given		40		1.4	1.1	1	0		5	2007	GOVERNMENT	RPM, INH, CAT I, CAT II	2	12	0
7	3	15	2010	0	15	CAL	2	7	1	1	1	2	1			CAT IV	2	2	2	1	NEGATIVE						5	MANSATALA	38	3	15.8169	155		Not Given		40	40	1.5	0.5	0.7	0	0	1	2009	GOVERNMENT	CAT II	2	6	0
7	3	16	2010	0	26	CAL	2	6	1	1	1	2	1			CAT IV	1	1	1	6	NEGATIVE	Sputum sent for 2nd line DST	5/23/2012				4	Bagbazar Chest Clinic	35	3	15.5556	150		Not Given		33	44	1.1	1.2	0.9	0	0	2	2003	GOVERNMENT	CAT I, CAT II	2	13	0
7	3	17	2010	0	15	NPG	2	6	1	1	1	1	1			CAT IV	2	2	1	3	NEGATIVE						4	Panihati S G Hospital	25	2	16	125		Not Given		30	32	1.4	1.1	0.6	0	7	2	2008	GOVERNMENT	CAT I, CAT II	2	10	0
7	3	18	2010	1	21	CAL	2	6	1	1	1	1	1			CAT IV	1	1	1	7	NEGATIVE	Sputum sent for 2nd line DST	2012-07-01				5	Tollygunge	42	3	17.4818	155		Not Given		43	42	1.2	0.7	0.8	0	9	3	2007	GOVERNMENT	CAT I, CAT II	2	15	0
7	3	19	2010	1	32	CAL	2	6	1	1	1	1	1			CAT IV	2	2	2	1	NEGATIVE						4	Tangra Chest Clinic	58	4	17.9012	180		Not Given		59	60	1.3	1	0.9	0	0	2	2009	GOVERNMENT	CAT I, CAT II	2	11	0
7	3	20	2010	1	20	NPG	1	6	1	1	1	1	1			CAT IV	2	2	2	1	NEGATIVE						10	Basirhat TU	34	2	20.1183	130		Not Given		43	38	0.9	0.8	0.7	0	0	2	2009	GOVERNMENT	CAT I, CAT II	2	9	0
7	3	21	2010	1	22	CAL	2	6	1	1	1	1	1			CAT IV	2	4	4	4	NEGATIVE						10	SBR TU	42	3	15.427	165		Not Given				1.5	0.7		54		2	2008	GOVERNMENT	CAT I, CAT II	2	10	0
7	3	22	2010	1	28	CAL	2	6	1	1	1	2	2			CAT IV	2	2	1	1	NEGATIVE						10	Stand Bank Road CC	25	2	11.1111	150		Not Given									2	1999	GOVERNMENT	AKT-4, CAT II	2	11	0
7	3	23	2010	0	20	NPG	1	6	1	1	1	2	2			CAT IV	2	2	2	3	NEGATIVE						10	Sagar Dutta SG Hospital	25	2	11.1111	150		Not Given		25	27	0.5	0.8	0.7	1	12	2	2005	GOVERNMENT	CAT I, CAT II	2	13	0
7	3	24	2010	0	40	NPG	2	6	1	1	1	1	2			CAT IV	2	2	2	1	NEGATIVE						10	Panihati S G Hospital	55	4	22.3133	157		Not Given		60	64	1.1	0.6	0.8	0	0	2	2008	GOVERNMENT	CAT I, CAT II	2	14	1
7	3	25	2010	0	35	CAL	2	6	1	1	1	1	1			CAT IV	2	2	2	1	POSITIVE						4	SBR TU	40	3	15.625	160		Not Given		56	62	1.2	0.6	0.5	0	0	1	2009	GOVERNMENT	CAT I	2	5	0
7	3	26	2010	1	30	CAL	2	6	1	1	2	2	1			CAT IV	2	2	9	1	NEGATIVE						11	Tollygunge	52	4	19.1001	165		Not Given		53	53	1.3	0.6	0.6	7	4	2	2008	GOVERNMENT	CAT I, CAT II	2	13	1
7	3	27	2010	1	44	CAL	2	6	1	1	1	1	1			CAT IV	1	2	1	4	NEGATIVE		2011-03-02				4	Tollygunge	42	3	16.6133	159		Not Given		42	43	1	0.8	0.7	4	7	4	2006	GOVERNMENT	2ND LINE ATD, CAT I, CAT II	2	30	0
7	3	28	2010	1	50	CAL	2	6	1	1	1	1	1			CAT IV	4	4	4	4	NEGATIVE						4	Tollygunge	36	3	14.6051	157		Not Given				1.3					1	2009	GOVERNMENT	CAT II	2	7	0
7	3	29	2010	1	22	NPG	2	6	1	1	1	2	2			CAT IV	2	2	2	1	NEGATIVE						4	BADURIA	36	3	14.7929	156		Not Given		40	39	1.3	1	0.8	0	0	2	2009	GOVERNMENT	CAT I, CAT II	2	14	0
7	3	30	2010	1	33	CAL	2	6	1	1	1	1	1			CAT IV	2	2	2	1	NEGATIVE						11	Tollygunge	58	4	17.51	182		Not Given		54	59	0.7	1.5	0.8	10	0	3	2005	GOVERNMENT	CAT I, CAT II	2	20	0
7	3	31	2010	1	38	NPG	2	6	1	1	1	2	2			CAT IV	2	2	1	4	NEGATIVE						10	Sagar Dutta SG Hospital	50	4	15.4321	180		Not Given		50	48	1.2	0.9	0.8	0	60	1	2009	GOVERNMENT	ATD, CAT II	2	4	0
7	3	32	2010	1	22	NPG	2	6	1	1	1	1	1			CAT IV	2	1	1	6	NEGATIVE	Sputum sent for 2nd line DST	5/23/2012				10	Sagar Dutta SG Hospital	35	3	19.2044	135		Not Given		39	39	1.4	0.7	0.9	0	17	2	2006	GOVERNMENT	ATD, CAT II	2	14	0
7	3	33	2010	1	20	NPG	2	6	1	1	1	2	2			CAT IV	1	2	2	8	NEGATIVE						10	DTC BARASAT	54	4	20.8325	161		Not Given		57	62	1.3	0.8	0.7	0	0	3	2008	GOVERNMENT	CAT I, CAT II	2	16	0
7	3	34	2010	0	17	CAL	2	5	1	1	1	1	1			CAT IV	2	2	2	1	NEGATIVE						4	Alipore CC	42	3	16.6133	159		Not Given		50	52	1.4	0.8	0.7	0	0	2	2009	GOVERNMENT	CAT I, CAT II	2	11	0
7	3	35	2010	0	17	CAL	2	6	1	1	1	1	1			CAT IV	2	9	1	8	NEGATIVE	Sputum sent for 2nd line DST	4/13/2012				4	Maniktala	30	2	17.7515	130		Not Given		33	36	1.1	0.6	0.6	0	0	4	2006	GOVERNMENT	CAT III, CAT II	2	26	0
7	3	36	2010	0	45	CAL	2	6	1	1	1	2	2			CAT IV	2	2	2	1	NEGATIVE						4	Maniktala	25	2	14.348	132		Not Given		28	30	1.2	1.1	1	0	0	2	2008	GOVERNMENT	CAT I, CAT II, ATD	2	18	0
7	3	37	2010	1	13	CAL	2	5	1	1	1	1	1			CAT IV	2	2	1	8	NEGATIVE	Sputum sent for 2nd line DST	5/23/2012				10	Maniktala	26	2	26	100		Not Given		18	18	0.5	0.7	0.6	0	0	2	2006	GOVERNMENT	CAT I, CAT II	2	15	0
7	3	38	2010	0	27	CAL	2	5	1	1	1	1	1			CAT IV	2	2	2	1	NEGATIVE						4	SEDP	38	3	14.4795	162		Not Given		50	52	0.6	0.7	0.8	0	0	3	2008	GOVERNMENT	CAT I, CAT II	2	10	0
7	3	39	2010	1	17	CAL	2	6	1	1	1	2	2			CAT IV	4	4	4	4	NEGATIVE						4	Bagbazar Chest Clinic	36	3	14.2399	159		Not Given				0.5					1	2009	GOVERNMENT	CAT I	2	5	0
7	3	40	2010	1	32	CAL	2	5	1	1	1	1	1			CAT IV	2	2	1	4	NEGATIVE						10	Stand Bank Road CC	40	3	15.4315	161		Not Given		38	36	0.5	1.2	0.9	11	67	2	2008	GOVERNMENT	CAT I, CAT II	2	9	0
7	3	41	2010	1	24	CAL	2	6	1	1	1	1	1			CAT IV	2	2	2	1	NEGATIVE						5	Tollygunge	40	3	19.8373	142		Not Given		40	43	1	1.2	0.8	0	35	3	2006	GOVERNMENT	CAT I, CAT II	2	19	0
7	3	42	2010	1	46	NPG	2	6	1	1	1	1	1			CAT IV	1	2	2	8	NEGATIVE						1	BADURIA	44	3	25.6395	131		Not Given		49	51	0.6	1.1	0.9	0	2	3	2007	GOVERNMENT	CAT I, CAT II	2	21	0
7	3	43	2010	1	18	CAL	2	6	1	1	1	1	1			CAT IV	2	2	2	8	NEGATIVE	Sputum sent for 2nd line DST	4/13/2012				4	Manashatala	40	3	16.6493	155		Not Given		43	48	0.9	0.8	0.7	0	0	2	2009	GOVERNMENT	CAT I, CAT II	2	13	0
7	3	44	2010	1	55	CAL	2	6	1	1	1	1	1			CAT IV	2	2	3	3	NEGATIVE						4	Maniktala	51	4	21.2279	155		Not Given		50	50	0.7	0.6	0.7	45	0	2	2008	GOVERNMENT	CAT I, CAT II	2	9	1
7	3	45	2010	0	26	CAL	2	6	1	1	1	1	1			CAT IV	2	2	2	8	NEGATIVE						4	Bagbazar Chest Clinic	35	3	14.5682	155		Not Given		32	36	0.9	0.9	0.6	0	0	2	2008	GOVERNMENT	CAT I, CAT II	2	11	0
7	3	46	2010	0	45	NPG	2	6	1	1	1	1	1			CAT IV	2	1	9	3	NEGATIVE						4	Biswanathpur TU	31	2	13.4176	152		Not Given		31	32	0.8	1.1	1.3	0	11	1	2007	GOVERNMENT	CAT II	2	17	0
7	3	47	2010	0	23	CAL	2	6	1	1	1	1	2			CAT IV	2	2	9	8	NEGATIVE						4	MTMTBH	45	4	13.8889	180		Not Given		42	45	0.6	0.5	0.6	0	0	4	2008	GOVERNMENT	CAT I, CAT II	2	15	0
7	3	48	2010	1	24	CAL	2	6	1	1	1	1	1			CAT IV	1	1	2	8	NEGATIVE						4	Manashatala	40	3	14.6924	165		Not Given		41	46	0.6	0.9	1.1	0	0	2	2008	GOVERNMENT	CAT I, CAT II	2	10	0
7	3	49	2010	1	45	NPG	2	6	1	1	1	1	1			CAT IV	2	2	9	8	NEGATIVE						4	Biswanathpur TU	43	3	16.7969	160		Not Given		50	52	0.9	0.8	0.9	0	37	2	2009	GOVERNMENT	CAT I, CAT II	2	9	0
7	3	50	2010	1	36	NPG	2	6	1	1	1	2	2			CAT IV	2	2	9	8	NEGATIVE						4	BAGHBAZAR	43	3	16.3847	162		Not Given		45	45	0.7	0.6	0.6	0	0	3	2008	GOVERNMENT	CAT I, CAT II	2	21	0
7	3	51	2010	1	52	CAL	2	6	1	1	1	1	1			CAT IV	4	4	4	4	NEGATIVE						5	Tollygunge	32	2	11.7539	165		Not Given				0.9			0		3	1994	GOVERNMENT	CAT I, CAT II	2	10	0
7	3	52	2010	0	15	CAL	2	6	1	1	1	1	1			CAT IV	2	2	1	8	NEGATIVE						4	Manashatala	43	3	19.6311	148		Not Given		39	41	1	0.6	0.6	0	0	1	2009	GOVERNMENT	CAT III	2	2	0
7	3	53	2010	0	21	CAL	2	5	1	1	1	1	1			CAT IV	2	2	9	8	NEGATIVE						4	BORAL MTM	34	2	11.7647	170		Not Given		38	45	0.5	0.6	0.5	20	0	2	2009	GOVERNMENT	ATD, CAT II	2	11	0
7	3	54	2010	0	18	CAL	2	5	1	1	1	1	1			CAT IV	2	2	2	8	NEGATIVE						4	MCC	45	4	15.5709	170		Not Given		46	47	0.5	0.7	0.9	0	12	3	2004	GOVERNMENT	CAT I, CAT II	2	22	0
7	3	55	2010	1	20	NPG	2	6	1	1	2	1	1			CAT IV	2	2	9	8	NEGATIVE						4	Sarapul TU	55	4	24.4444	150		Not Given		53	57	0.5	0.7	0.6	3	8	2	2009	GOVERNMENT	CAT I, CAT II	2	8	0
7	3	56	2010	1	55	NPG	2	6	1	1	1	2	1			CAT IV	2	2	9	8	NEGATIVE	Sputum sent for 2nd line DST	5/23/2012				4	BISWANATHPUR	45	4	13.8889	180		Not Given		52	51	0.7	0.8	0.9	0	28	2	2009	GOVERNMENT	CAT I, CAT II	2	13	0
7	3	57	2010	1	42	NPG	2	6	1	1	1	2	2			CAT IV	2	2	9	4	NEGATIVE						4	Sarapul TU	55	4	21.4844	160		Not Given		55	58	1.2	0.8	1.1	25	113	2	2009	GOVERNMENT	CAT I, CAT II	2	8	0
7	3	58	2010	1	33	NPG	2	6	1	1	1	1	1			CAT IV	2	2	2	8	NEGATIVE						11	GAIGHATA	41	3	16.0156	160		Not Given		46	46	1.2	1.1	1.2	0	0	1	2008	GOVERNMENT	CAT II	2	16	0
7	3	59	2010	1	40	NPG	2	5	1	1	1	2	2			CAT IV	2	2	9	8	NEGATIVE						4	Biswanathpur TU	50	4	19.5313	160		Not Given		62	64	0.8	0.9	0.8	0	12	2	2007	GOVERNMENT	CAT I, CAT II	2	15	0
7	3	60	2010	1	65	NPG	2	5	1	1	1	1	1			CAT IV	2	1	1	8	NEGATIVE		2011-08-10				4	BISWANATHPUR	45	4	18.7305	155		Not Given		43	41	0.9	0.8	0.8	101	59	1	2009	GOVERNMENT	CAT II	2	5	0
7	3	61	2010	1	23	CAL	2	6	1	1	1	2	2			CAT IV	1	2	1	3	NEGATIVE	Sputum sent for 2nd line DST	4/13/2012				5	Tangra Chest Clinic	40	3	17.313	152		Not Given		42	43	0.8	1	0.7	0	8	4	2004	GOVERNMENT	CAT I, CAT II	2	25	0
7	3	62	2010	1	45	CAL	2	6	1	1	1	1	1			CAT IV	1	9	9	8	NEGATIVE						4	Tollygunge	41	3	17.0656	155		Not Given		41	44	0.7	0.6	0.7	0	0	3	1991	GOVERNMENT	CAT I, CAT II	2	17	0
7	3	63	2010	1	40	CAL	2	6	1	1	2	2	2			CAT IV	2	2	9	8	NEGATIVE						4	SBR TU	71	5	21.4346	182		Not Given		76	80	0.7	0.7	0.6	7	13	3	2002	GOVERNMENT	CAT I, CAT II	2	24	1
7	3	64	2010	0	22	NPG	2	7	1	1	2	2	2			CAT IV	2	9	4	4	NEGATIVE						4	Gaighata TU	33	2	13.7357	155		Not Given				0.4	0.5		3	0	1	2008	GOVERNMENT	CAT II	2	12	0
7	3	65	2010	1	21	NPG	2	6	1	1	1	1	1			CAT IV	2	2	9	8	NEGATIVE						4	Naihati SGH	42	3	17.2584	156		Not Given		43	45	0.7	0.6	0.5	1	31	2	2009	GOVERNMENT	CAT III, CAT II	2	6	0
7	3	66	2010	1	32	NPG	2	6	1	1	1	2	1			CAT IV	2	2	2	8	NEGATIVE						4	B N Bose Road	40	3	16.6493	155		Not Given		45	45	0.8	1.1	1	0	24	2	2009	GOVERNMENT	CAT I, CAT II	2	9	0
7	3	67	2010	1	70	NPG	2	6	1	1	1	2	1			CAT IV	2	2	3	3	NEGATIVE						4	Bhatpara SGH TU	40	3	13.8408	170		Not Given		47		0.6	0.7	0.5	25	46	3	2007	GOVERNMENT	CAT I, CAT II	2	21	0
7	3	68	2010	1	45	CAL	1	6	1	1	2	2	2			CAT IV	2	2	2	8	NEGATIVE						4	Behala TU	58	4	17.51	182		Not Given		60	60	0.5	0.7	0.6	0	0	4	2009	GOVERNMENT	CAT I, CAT II	2	11	0
7	3	69	2010	1	38	NPG	1	6	1	1	1	1	1			CAT IV	2	2	9	8	NEGATIVE						4	BONGAON	40	3	13.0612	175		Not Given		43	44	0.8	0.7	0.6	0	31	2	2009	GOVERNMENT	CAT I, CAT II	2	14	0
7	3	70	2010	1	14	NPG	2	6	1	1	1	1	1			CAT IV	2	2	2	8	NEGATIVE						4	Naihati SGH	45	4	17.5781	160		Not Given		55	56	0.4	0.6	0.5	0	0	3	2008	GOVERNMENT	CAT I, CAT II	2	20	0
7	3	71	2010	1	24	NPG	2	5	1	1	1	1	2			CAT IV	2	1	2	8	NEGATIVE						4	B N Bose Road	45	4	17.5781	160		Not Given		47	49	0.5	0.6	0.6	0	0	1	2009	GOVERNMENT	CAT II	2	7	0
7	3	72	2010	1	25	NPG	2	6	1	1	1	2	1			CAT IV	1	2	2	8	NEGATIVE						4	Naihati SGH	57	4	22.2656	160		Not Given		60	60	0.6	0.8	0.9	24	9	2	2005	GOVERNMENT	ATD, CAT II	2	15	0
7	3	73	2010	0	22	CAL	2	6	1	1	1	2	2			CAT IV	2	2	2	8	NEGATIVE						4	Tollygunge	54	4	24	150		Not Given		54	54	0.7	0.6	0.8	0	0	1	2010	GOVERNMENT	CAT II	2	9	0
7	3	74	2010	1	24	CAL	2	6	1	1	1	2	1			CAT IV	2	2	2	8	NEGATIVE						4	BAM INDIA	48	4	18.75	160		Not Given		60	62	0.7	0.8	0.9	0	0	3	2002	GOVERNMENT	CAT I, CAT II	2	25	0
7	3	75	2010	1	70	CAL	1	6	1	1	1	2	1			CAT IV	2	2	3	3	NEGATIVE						4	Bagbazar Chest Clinic	48	4	14.8148	180		Not Given		48		0.6	1	0.8	1	11	2	2009	GOVERNMENT	CAT I, CAT II	2	13	0
7	3	76	2010	1	45	NPG	1	6	1	1	1	1	1			CAT IV	9	2	2	8	NEGATIVE						4	B N Bose Road	40	3	16.8663	154		Not Given		45	45	1	0.9	0.8	0	5	2	2009	GOVERNMENT	CAT I, CAT II	2	6	0
7	3	77	2010	1	45	NPG	1	6	1	1	1	2	2			CAT IV	2	2	2	8	NEGATIVE						4	DTC BARASAT	43	3	16.7969	160		Not Given		48	46	1.4	1	0.9	0	12	2	2009	GOVERNMENT	CAT I, CAT II	2	15	0
7	3	78	2010	1	18	NPG	2	6	1	1	2	2	1			CAT IV	2	2	9	8	NEGATIVE						4	Biswanathpur TU	54	4	18.6851	170		Not Given		55	57	0.7	0.8	0.6	2	0	2	2009	GOVERNMENT	CAT I, CAT II	2	11	0
7	3	79	2010	0	17	NPG	1	6	1	1	2	2	1			CAT IV	2	2	9	8	NEGATIVE						4	HABRA	32	2	13.3195	155		Not Given		38	32	0.4	0.7	0.7	12	15	2	2009	GOVERNMENT	CAT I, CAT II	2	7	0
7	3	80	2010	0	33	CAL	1	6	1	1	2	1	1			CAT IV	2	2	2	8	NEGATIVE						4	BAM INDIA	42	3	17.9418	153		Not Given		47	47	0.8	0.9	1.1	0	0	2	2009	GOVERNMENT	CAT I, CAT II	2	13	0
7	3	81	2010	1	51	NPG	2	6	1	1	1	2	2			CAT IV	2	2	9	8	NEGATIVE						4	Amdanga TU	48	4	18.75	160		Not Given		46	44	1	0.9	0.7	10	5	2	2009	GOVERNMENT	CAT I, CAT II	2	7	0
7	3	82	2010	1	40	CAL	2	6	1	1	2	2	1			CAT IV	1	1	1	3	NEGATIVE	XDR SUSPECT TO BE SEND					4	Tangra Chest Clinic	36	3	13.8884	161		Not Given		47	48	0.4	0.6	0.8	0	13	3	2007	GOVERNMENT	CAT I, CAT II	2	18	0
7	3	83	2010	1	23	CAL	2	6	1	1	1	2	1			CAT IV	2	2	2	8	NEGATIVE						4	Tangra Chest Clinic	50	4	21.3593	153		Not Given		57	58	0.5	0.7	0.7	0	0	2	2009	GOVERNMENT	CAT I, CAT II	2	14	0
7	3	84	2010	1	33	CAL	1	6	1	1	2	2	1			CAT IV	2	2	2	4	NEGATIVE						4	Tangra Chest Clinic	38	3	15.0311	159		Not Given		41	40	0.8	0.7	0.8	16	0	2	2009	GOVERNMENT	CAT I, CAT II	2	9	0
7	3	85	2010	1	48	NPG	1	6	1	1	1	2	2			CAT IV	9	3	3	3	NEGATIVE						4	Maslandapur BPHC	36	3	13.8884	161		Not Given				0.9			20		2	2009	GOVERNMENT	CAT I, CAT II	2	10	0
7	3	86	2010	1	45	NPG	1	6	1	1	1	1	1			CAT IV	9	3	3	3	NEGATIVE						4	BARASAT DTC	35	3	13.8444	159		Not Given				1	0.9		116		2	2009	GOVERNMENT	CAT I, CAT II	2	6	0
7	3	87	2010	1	65	NPG	1	6	1	1	1	2	2			CAT IV	2	2	9	8	NEGATIVE						4	HABRA	45	4	17.3604	161		Not Given		46	45	1.1	1.2	0.9	13	6	2	2009	GOVERNMENT	CAT I, CAT II	2	6	0
7	3	88	2010	0	35	NPG	2	5	1	1	1	1	2			CAT IV	1	2	2	8	NEGATIVE						4	BARASAT DTC	26	2	11.5556	150		Not Given		26	28	0.6	0.7	0.5	0	0	2	2008	GOVERNMENT	CAT I, CAT II	2	11	0
7	3	89	2010	1	55	NPG	2	5	1	1	1	2	1			CAT IV	9	1	4	4	NEGATIVE						4	NSGH	44	3	16.9747	161		Not Given				1			0		2	2006	GOVERNMENT	CAT I, CAT II	2	18	0
7	3	90	2010	1	22	NPG	1	6	1	1	1	1	2			CAT IV	2	2	9	4	NEGATIVE						4	BONGAON	60	4	17.531	185		Not Given		62	62	1	0.9	1.1	0	0	2	2010	GOVERNMENT	CAT I, CAT II	2	12	0
7	3	91	2010	1	28	NPG	1	6	1	1	1	2	2			CAT IV	1	2	4	4	NEGATIVE						4	Ashoknagar SG Hospital	40	3	15.625	160		Not Given				0.7	0.9		28	0	2	2009	GOVERNMENT	CAT I, CAT II	2	13	0
7	3	92	2010	1	73	NPG	2	6	1	1	2	2	2			CAT IV	9	2	3	3	NEGATIVE						4	NSGH	45	4	17.1468	162		Not Given		42		0.4	0.5	1.2	87		2	2009	GOVERNMENT	ATD, CAT II	2	8	0
7	3	93	2010	1	14	CAL	1	6	1	1	1	1	1			CAT IV	2	2	9	8	NEGATIVE						4	Tangra Chest Clinic	44	3	18.3143	155		Not Given		50	50	0.8	0.6	0.7	0	0	2	2009	GOVERNMENT	CAT I, CAT II	2	14	0
7	3	94	2010	0	35	NPG	2	6	1	1	2	1	1			CAT IV	2	2	2	8	NEGATIVE						4	B N Bose Road	45	4	19.2234	153		Not Given		50	49	0.5	0.7	0.8	6	0	2	2009	GOVERNMENT	CAT I, CAT II	2	9	0
7	3	95	2010	0	67	NPG	2	6	1	1	1	2	2			CAT IV	2	2	2	3	NEGATIVE						4	NSGH	35	3	15.1489	152		Not Given		39	38	0.9	0.7	0.8	0	0	3	2009	GOVERNMENT	CAT I, CAT II	2	11	1
7	3	96	2010	0	40	CAL	1	6	1	1	1	1	1			CAT IV	2	2	1	8	NEGATIVE	Sputum sent for 2nd line DST	2012-07-01				4	MNCC	63	4	24.6094	160		Not Given		65	72	0.6	0.8	0.7	0	24	1	2009	GOVERNMENT	CAT I	2	5	0
7	3	97	2010	0	45	NPG	2	5	1	1	1	2	1			CAT IV	2	1	9	3	NEGATIVE						4	Basirhat TU	30	2	12.3274	156		Not Given		31	36	0.6	0.6	0.6	0	0	2	2005	GOVERNMENT	CAT I, CAT II	2	10	0
7	3	98	2010	0	21	CAL	2	6	1	1	1	1	2			CAT IV	2	2	9	8	NEGATIVE						4	SBR TU	26	2	15.3846	130		Not Given		30	32	0.8	0.7	0.5	27	0	2	2008	GOVERNMENT	CAT I, CAT II	2	13	0
7	3	99	2010	0	18	NPG	1	6	1	1	1	2	1			CAT IV	2	2	2	8	NEGATIVE						4	Sagar Dutta SG Hospital	32	2	13.3195	155		Not Given		31	34	0.4	0.7	0.5	1	4	2	2009	GOVERNMENT	CAT I, CAT II	2	10	0
7	3	100	2010	1	38	CAL	2	7	1	1	1	2	1			CAT IV	2	2	2	8	NEGATIVE						4	Alipore CC	42	3	16.6133	159		Not Given		43	47	1.2	1	1.1	0	0	2	2008	GOVERNMENT	CAT I, CAT II	2	6	0
7	3	101	2010	1	25	CAL	2	5	1	1	1	1	1			CAT IV	2	2	2	8	NEGATIVE						11	MANOSATALA	62	4	20.2449	175		Not Given		62	67	0.4	1.1	1	0	0	4	2007	GOVERNMENT	ATD, CAT II	2	15	0
7	3	102	2010	0	60	NPG	2	5	1	1	1	2	1			CAT IV	2	2	2	8	NEGATIVE						4	MINAKHAN RH	26	2	11.2535	152		Not Given		32	34	0.5	0.7	0.6	0	0	1	2000	GOVERNMENT	CAT II	2	12	0
7	3	103	2010	0	17	NPG	1	6	1	1	1	1	2			CAT IV	2	2	2	8	NEGATIVE						11	NAIHATI	36	3	14.0625	160		Not Given		35	34	0.9	1	0.8	0	33	2	2009	GOVERNMENT	CAT I, CAT II	2	11	0
7	3	104	2010	0	16	NPG	2	6	1	1	1	1	1			CAT IV	1	1	1	3	NEGATIVE	Sputum sent for 2nd line DST	8/19/2011				4	BHATPARA SGH	32	2	13.3195	155		Not Given		35	36	0.3	0.4	0.3	1	0	3	2007	GOVERNMENT	HRE, CAT II	2	22	0
7	3	105	2010	0	27	CAL	1	6	1	1	1	1	1			CAT IV	1	2	9	8	NEGATIVE						4	Maniktala	40	3	15.625	160		Not Given		48	46	0.8	0.7	0.8	22	18	1	2009	GOVERNMENT	CAT I	2	5	0
7	3	106	2010	1	39	NPG	2	5	1	1	1	2	1			CAT IV	2	2	2	8	NEGATIVE						4	REKJOANI	75	5	28.578	162		Not Given		72	73	1	0.8	1.1	13	19	1	2007	GOVERNMENT	CAT II	2	9	0
7	3	107	2010	1	30	NPG	2	5	1	1	1	2	2			CAT IV	2	2	2	8	NEGATIVE						4	BONGAON	50	4	20.8117	155		Not Given		59	62	0.8	0.9	1	0	10	2	2008	GOVERNMENT	CAT I, CAT II	2	18	1
7	3	108	2010	1	35	NPG	1	6	1	1	1	2	2			CAT IV	2	2	2	8	NEGATIVE						4	BHATPARA SGH	42	3	17.4818	155		Not Given		44	45	0.9	0.8	1	4	9	2	2009	GOVERNMENT	CAT I, CAT II	2	9	0
7	3	109	2010	1	40	NPG	1	6	1	1	1	1	2			CAT IV	2	2	2	8	NEGATIVE						4	BONGAON	45	4	16.5289	165		Not Given		48	51	0.5	0.7	0.6	0	7	2	2009	GOVERNMENT	CAT I, CAT II	2	14	0
7	3	110	2010	1	45	NPG	1	6	1	1	1	1	1			CAT IV	2	2	2	8	NEGATIVE						4	HABRA	26	2	9.55005	165		Not Given		29	29	0.6	0.7	0.8	0	0	2	2009	GOVERNMENT	CAT I, CAT II	2	6	0
7	3	111	2010	1	24	NPG	1	6	1	1	1	1	1			CAT IV	1	1	4	4	NEGATIVE						4	Naihati SGH	39	3	15.2344	160		Not Given				0.9	0.9		0		2	2010	GOVERNMENT	CAT I, CAT II	2	9	0
7	3	112	2010	1	33	CAL	2	5	1	1	1	1	2			CAT IV	2	2	2	8	NEGATIVE						11	Maniktala	65	5	23.8751	165		Not Given		68	70	0.6	0.7	0.8	0	0	3	1995	GOVERNMENT	ATD, CAT II	2	21	0
7	3	113	2010	0	30	NPG	1	6	1	1	1	1	1			CAT IV	2	2	2	8	NEGATIVE						4	BISWANATHPUR BPHC	28	2	13.3175	145		Not Given		36	38	0.4	0.5	0.6	1	1	1	2009	GOVERNMENT	CAT I	2	5	0
7	3	114	2010	0	38	CAL	1	6	1	1	1	1	2			CAT IV	2	2	2	8	NEGATIVE						4	BEHALA	38	3	12.4082	175		Not Given		41	42	0.6	0.6	0.7	0	0	1	2009	GOVERNMENT	CAT I	2	5	1
7	3	115	2010	0	45	CAL	1	6	1	1	1	1	2			CAT IV	3	3	3	3	NEGATIVE						4	Tangra Chest Clinic	45	4	20	150		Not Given				0.9	1				1	2009	GOVERNMENT	CAT I	2	5	1
7	3	116	2010	0	18	NPG	1	6	1	1	1	1	2			CAT IV	1	2	2	8	NEGATIVE						4	BARRACKPORE B N BOSE	34	2	13.2813	160		Not Given		35	36	0.7	0.8	0.7	0	0	2	2010	GOVERNMENT	CAT I, CAT II	2	6	0
7	3	117	2010	0	34	NPG	1	6	1	1	2	2	2			CAT IV	2	2	2	8	NEGATIVE						4	BARRACKPORE B N BOSE	50	4	20.8117	155		Not Given		55	52	0.9	0.7	0.7	33	16	2	2009	GOVERNMENT	CAT I, CAT II	2	11	0
7	3	118	2010	1	48	NPG	2	6	1	1	1	2	2			CAT IV	4	4	4	4	NEGATIVE						4	BARRACKPORE B N BOSE	41	3	17.0656	155		Not Given				1			9		2	2008	GOVERNMENT	CAT I, CAT II	2	12	0
7	3	119	2010	1	25	CAL	2	6	1	1	1	2	2			CAT IV	2	2	9	8	NEGATIVE						4	Manashatala	45	4	17.5781	160		Not Given		47	50	0.9	0.9	1.1	0	0	1	2009	GOVERNMENT	CAT II	2	9	0
7	3	120	2010	1	27	NPG	2	6	1	1	1	2	1			CAT IV	2	2	2	8	NEGATIVE						4	HABRA	45	4	18.7305	155		Not Given		50	49	1.1	1	1.1	0	0	2	2008	GOVERNMENT	CAT I, CAT II	2	13	0
7	3	121	2010	0	17	CAL	2	5	1	1	1	1	2			CAT IV	2	2	9	8	NEGATIVE						4	BORAL MTM	21	1	8.20313	160		Not Given		25	29	0.4	0.5	0.6	0	0	2	2007	GOVERNMENT	CAT I, CAT II	2	11	0
7	3	122	2010	1	21	NPG	2	5	1	1	1	1	1			CAT IV	2	2	9	8	NEGATIVE						4	BADURIA	40	3	16.6493	155		Not Given		41	44	0.7	0.8	0.7	0	0	4	2006	GOVERNMENT	CAT I, CAT II	2	29	0
7	3	123	2010	1	30	CAL	2	7	1	1	1	1	2			CAT IV	3	3	3	3	NEGATIVE						4	Bagbazar Chest Clinic	41	3	17.0656	155		Not Given		40		0.8	0.9	1.1	20		2	2010	GOVERNMENT	AKD4, CAT II	2	7	0
7	3	124	2010	1	28	NPG	2	5	1	1	1	1	1			CAT IV	2	9	2	4	NEGATIVE						4	DR. B N BOSE SDH	40	3	15.4315	161		Not Given				0.8	0.7		35		1	2008	GOVERNMENT	CAT II	2	12	0
7	3	125	2010	1	24	NPG	2	5	1	1	1	1	2			CAT IV	2	2	2	8	NEGATIVE						11	BADURIA	43	3	16.7969	160		Not Given		49	51	0.8	0.7	0.8	0	0	2	2008	GOVERNMENT	CAT I, CAT II	2	15	0
7	3	126	2010	1	45	CAL	2	7	1	1	2	2	1			CAT IV	4	4	4	4	NEGATIVE						4	Tangra Chest Clinic	54	4	21.3599	159		Not Given				1	0.9				2	2009	GOVERNMENT	HRE, CAT II	2	11	1
7	3	127	2010	1	24	NPG	2	5	1	1	1	2	1			CAT IV	2	2	9	8	NEGATIVE						4	Panihati S G Hospital	40	3	15.8222	159		Not Given		40	44	0.7	0.8	0.9	0	0	3	2008	GOVERNMENT	CAT I, CAT II	2	20	0
7	3	128	2010	1	36	CAL	2	5	1	1	1	1	1			CAT IV	2	2	9	8	NEGATIVE						4	Maniktala	44	3	18.0802	156		Not Given		48	52	0.8	0.9	0.8	4	0	2	2009	GOVERNMENT	CAT I, CAT II	2	14	0
7	3	129	2010	1	25	CAL	1	6	1	1	2	2	2			CAT IV	2	2	9	8	NEGATIVE						4	BORAL MTM	45	4	17.3604	161		Not Given		49	56	0.9	0.8	0.9	0	0	1	2009	GOVERNMENT	CAT I	2	5	0
7	3	130	2010	1	19	NPG	2	5	1	1	1	1	2			CAT IV	9	9	4	4	NEGATIVE						4	DUMDUM	40	3	15.8222	159		Not Given		44		0.8	0.8	1	126	0	2	2008	GOVERNMENT	CAT I, CAT II	2	14	0
7	3	131	2010	0	33	CAL	1	6	1	1	1	2	2			CAT IV	2	2	9	8	NEGATIVE						4	SBR TU	45	4	18.9745	154		Not Given		51	53	0.7	0.8	0.9	0	10	2	2009	GOVERNMENT	CAT I, CAT II	2	8	1
7	3	132	2010	0	60	NPG	2	5	1	1	2	2	1			CAT IV	2	2	9	8	NEGATIVE						4	BONGAON	40	3	17.313	152		Not Given		41	44	0.9	1	0.9	0	54	3	2008	GOVERNMENT	CAT I, CAT II	2	23	0
7	3	133	2010	0	17	NPG	2	7	1	1	1	2	2			CAT IV	1	1	2	8	NEGATIVE	Sputum sent for 2nd line DST	2012-07-01				4	DUMDUM	38	3	14.8438	160		Not Given		38	35	0.6	0.9	0.6	3	0	3	2009	GOVERNMENT	CAT I, CAT II	2	12	0
7	3	134	2010	0	45	NPG	2	7	1	1	1	2	2			CAT IV	2	2	2	8	NEGATIVE						4	DUMDUM	41	3	17.0656	155		Not Given		42	44	1	0.9	1.1	2	9	1	2009	GOVERNMENT	CAT II	2	9	0
7	3	135	2010	1	29	CAL	2	5	1	1	1	2	2			CAT IV	1	1	9	8	NEGATIVE	Sputum sent for 2nd line DST	5/23/2012				4	SBR TU	37	3	14.8213	158		Not Given		38	35	0.5	0.6	0.5	8	9	2	2008	GOVERNMENT	CAT I, CAT II	2	12	0
7	3	136	2010	1	38	CAL	5	8	1	1	2	2	2			CAT IV	2	2	9	8	NEGATIVE						4	SBR TU	55	4	21.7555	159		Not Given		52	53	0.9	1	0.9	1	18	1	2010	GOVERNMENT	CAT I	2	5	1
7	3	137	2010	1	68	NPG	2	5	1	1	1	2	2			CAT IV	2	1	2	8	NEGATIVE						4	Panihati S G Hospital	45	4	13.8889	180		Not Given		55	57	0.9	0.8	0.9	11	0	3	2007	GOVERNMENT	CAT I, CAT II	2	21	0
7	3	138	2010	1	35	NPG	2	5	1	1	1	2	2			CAT IV	2	3	3	3	NEGATIVE						4	BAGDAH	26	2	10.0305	161		Not Given				0.6	0.6		0		1	2008	GOVERNMENT	CAT II	2	20	0
7	3	139	2010	1	33	NPG	1	6	1	1	1	2	2			CAT IV	2	2	2	8	NEGATIVE						4	TAKI RH	60	4	22.5827	163		Not Given		58	59	0.6	0.9	1	30	15	2	2009	GOVERNMENT	CAT I, CAT II	2	8	1
7	3	140	2010	0	17	NPG	1	6	1	1	1	2	2			CAT IV	2	2	2	8	NEGATIVE						4	BHATPARA SGH	26	2	11.5556	150		Not Given		31	32	0.7	0.8	0.8	0	8	2	2009	GOVERNMENT	CAT I, CAT II	2	11	0
7	3	141	2010	1	54	NPG	1	6	1	1	1	2	2			CAT IV	2	1	1	8	NEGATIVE						4	HABRA	41	3	15.8173	161		Not Given		38	40	0.5	0.7	0.6	2	2	2	2009	GOVERNMENT	CAT I, CAT II	2	12	0
7	3	142	2010	1	23	CAL	1	6	1	1	1	1	1			CAT IV	4	4	4	4	NEGATIVE						4	Tangra Chest Clinic	41	3	16.2177	159		Not Given				1			3		2	2009	GOVERNMENT	CAT I, CAT II	2	12	0
7	3	143	2010	1	16	CAL	1	6	1	1	1	2	1			CAT IV	2	2	2	8	NEGATIVE						4	Tangra Chest Clinic	39	3	15.2344	160		Not Given		44	44	0.9	0.8	0.9	0	0	2	2009	GOVERNMENT	CAT I, CAT II	2	11	0
7	3	1	2011	1	17	NPG	2	6	1	1	1	1	1			CAT IV	2	2	2	8	NEGATIVE						4	BARASAT DTC	40	3	15.8222	159		Not Given		41	42	0.4	0.8	0.7	160	24	2	2008	GOVERNMENT	CAT I, CAT II	2	15	0
7	3	2	2011	1	38	NPG	2	7	1	1	1	1	1			CAT IV	1	9	9	8	NEGATIVE						4	Panihati S G Hospital	38	3	14.6599	161		Not Given		40	41	0.8	0.9	0.8	161		2	2009	GOVERNMENT	CAT I, CAT II	2	17	0
7	3	3	2011	1	32	NPG	1	6	1	1	1	2	2			CAT IV	1	4	4	4	NEGATIVE						4	BARASAT DTC	52	4	16.598	177		Not Given				0.6			46		2	2009	GOVERNMENT	CAT I, CAT II	2	7	0
7	3	4	2011	1	19	CAL	1	6	1	1	1	2	1			CAT IV	2	9	9	8	NEGATIVE						4	Manashatala	45	4	18.7305	155		Not Given		46	48	0.6	0.7	0.7	0	0	2	2009	GOVERNMENT	CAT I, CAT II	2	6	0
7	3	5	2011	0	25	CAL	2	5	1	1	1	1	2			CAT IV	2	2	9	8	NEGATIVE						4	Manashatala	41	3	15.0597	165		Not Given		45	48	0.8	0.9	0.8	0	0	1	2008	GOVERNMENT	CAT II	2	16	0
7	3	6	2011	0	23	NPG	2	6	1	1	1	2	1			CAT IV	1	1	3	3	NEGATIVE	Sputum sent for 2nd line DST	8/19/2011				4	Panihati S G Hospital	25	2	11.1111	150		Not Given		27		0.8	0.9	0.8	6	0	4	2006	GOVERNMENT	CAT I, CAT II	2	15	0
7	3	7	2011	0	28	CAL	1	6	1	1	1	1	1			CAT IV	2	2	9	8	NEGATIVE						4	Tangra Chest Clinic	39	3	16.2331	155		Not Given		42	37	0.6	0.7	0.6	0	0	2	2009	GOVERNMENT	CAT I, CAT II	2	9	0
7	3	8	2011	1	20	NPG	2	7	1	1	1	1	2			CAT IV	2	1	9	8	NEGATIVE						4	SERAPOLE RH	45	4	15.3894	171		Not Given		44	45	0.7	0.8	0.7	12	0	1	2010	GOVERNMENT	CAT II	2	12	0
7	3	9	2011	1	42	NPG	2	5	1	1	1	2	2			CAT IV	2	2	9	8	NEGATIVE						4	BARRACKPORE B N BOSE	36	3	14.0625	160		Not Given		35	35	1.1	1	1.1	2	6	1	2009	GOVERNMENT	CAT II	2	5	0
7	3	10	2011	0	18	NPG	1	6	1	1	1	1	1			CAT IV	2	2	9	8	NEGATIVE						4	SARAPUL	30	2	11.7188	160		Not Given		31	30	0.7	0.8	0.7	10	0	1	2009	GOVERNMENT	CAT I	2	5	0
7	3	11	2011	0	47	NPG	1	6	1	1	1	2	2			CAT IV	2	2	9	3	NEGATIVE						4	Panihati S G Hospital	51	4	21.2279	155		Not Given		53		0.6	0.7	0.6	7	18	2	2010	GOVERNMENT	CAT I, CAT II	2	6	1
7	3	12	2011	1	22	CAL	2	5	1	1	1	1	1			CAT IV	2	2	9	8	NEGATIVE						4	Maniktala	45	4	18.7305	155		Not Given		60	64	1.4	1.3	1.4	0	0	2	2009	GOVERNMENT	CAT I, CAT II	2	18	0
7	3	13	2011	1	51	NPG	2	5	1	1	1	2	2			CAT IV	2	2	9	8	NEGATIVE						4	BADURIA	45	4	13.1483	185		Not Given		47	46	0.5	0.8	1.1	0	0	2	2008	GOVERNMENT	CAT I, CAT II	2	15	0
7	3	14	2011	1	24	NPG	2	7	1	1	1	2	2			CAT IV	2	1	9	8	NEGATIVE						4	AMDANGA BPHC	58	4	24.1415	155		Not Given		67	65	0.6	0.7	0.7	0	0	2	2008	GOVERNMENT	CAT I, CAT II	2	11	0
7	3	15	2011	1	21	NPG	2	5	1	1	1	1	2			CAT IV	1	1	4	4	NEGATIVE	Sputum sent for 2nd line DST	2012-07-01				4	BARRACKPORE B N BOSE	38	3	16.8889	150		Not Given		44		1.2	1.1	0.9	49		1	2009	GOVERNMENT	CAT II	2	5	0
7	3	16	2011	0	16	CAL	2	5	1	1	1	1	1			CAT IV	2	2	9	8	NEGATIVE						4	Maniktala	40	3	17.7778	150		Not Given		35	36	0.6	0.7	0.6	0	0	2	2009	GOVERNMENT	CAT I, CAT II	2	17	0
7	3	17	2011	0	33	NPG	2	5	1	1	1	1	1			CAT IV	2	2	9	8	NEGATIVE						4	BADURIA	45	4	16.7311	164		Not Given		44	43	0.8	0.8	0.9	0	0	1	2008	GOVERNMENT	CAT II	2	14	0
7	3	18	2011	0	20	NPG	1	6	1	1	1	1	2			CAT IV	2	9	9	8	NEGATIVE						4	Basirhat TU	35	3	14.5682	155		Not Given		36	35	0.6	0.8	0.8	9	4	2	2009	GOVERNMENT	CAT I, CAT II	2	13	0
7	3	19	2011	1	37	NPG	2	5	1	1	1	1	2			CAT IV	1	1	9	8	NEGATIVE						4	BHATPARA SGH	45	4	16.5289	165		Not Given			43	0.9	0.7	0.7	9	0	1	2007	GOVERNMENT	CAT II	2	22	0
7	3	20	2011	1	19	CAL	2	7	1	1	1	2	2			CAT IV	2	9	9	8	NEGATIVE						4	Manashatala	40	3	16.6493	155		Not Given		41	44	1.5	1.5	1.2	0	0	1	2008	GOVERNMENT	CAT II	2	13	0
7	3	21	2011	1	55	NPG	1	6	1	1	1	1	2			CAT IV	9	9	4	4	NEGATIVE						4	NAIHATI	45	4	16.5289	165		Not Given				0.7	1.1		49		2	2009	GOVERNMENT	CAT I, CAT II	2	14	0
7	3	22	2011	1	56	NPG	2	5	1	1	1	1	1			CAT IV	3	3	3	3	NEGATIVE						4	Panihati S G Hospital	59	4	18.4139	179		Not Given				1.5	0.8		8		3	2006	GOVERNMENT	CAT I, CAT II	2	23	0
7	3	23	2011	1	20	CAL	2	5	1	1	1	1	1			CAT IV	2	2	9	8	NEGATIVE						4	Manashatala	40	3	15.0551	163		Not Given		43	45	1	0.9	0.8	0	0	1	2008	GOVERNMENT	CAT II	2	17	0
7	3	24	2011	1	35	CAL	2	7	1	1	1	1	2			CAT IV	9	1	9	8	NEGATIVE	Sputum sent for 2nd line DST	4/13/2012				4	Tangra Chest Clinic	45	4	16.5289	165		Not Given		40	38	0.9			0	0	4	2007	GOVERNMENT	AKT-4, Sm PZA, ETB, CAT II	2	12	0
7	3	25	2011	1	29	CAL	2	5	1	1	1	2	2			CAT IV	2	2	9	4	NEGATIVE						4	Manashatala	52	4	19.1001	165		Not Given		55	56	0.7	0.8	0.7	0	12	3	2008	GOVERNMENT	CAT I, CAT II	2	21	0
7	3	26	2011	1	42	CAL	2	4	1	1	1	2	1			CAT IV	2	9	9	8	NEGATIVE	Sputum sent for 2nd line DST	4/13/2012				4	BEHALA	50	4	18.5901	164		Not Given		57	57	0.8	0.7	0.9	0	14	1	2010	GOVERNMENT	CAT II	2	4	0
7	3	27	2011	1	35	CAL	2	6	1	1	1	2	2			CAT IV	2	2	9	8	NEGATIVE						4	Alipore CC	45	4	20	150		Not Given		45	46	0.7	0.8	0.7	0	0	3	2000	GOVERNMENT	CAT III, CAT II	2	18	0
7	3	28	2011	1	58	NPG	2	7	1	1	1	2	2			CAT IV	1	1	9	8	NEGATIVE						4	AMDANGA BPHC	40	3	15.4315	161		Not Given		39	34	0.8	0.7	0.7	26	0	2	2010	GOVERNMENT	CAT I, CAT II	2	7	0
7	3	29	2011	1	60	NPG	2	5	1	1	1	1	1			CAT IV	2	2	9	8	NEGATIVE						4	Sagar Dutta SG Hospital	54	4	17.6327	175		Not Given		50	51	1.3	1.1	1	0	0	3	2007	GOVERNMENT	ATD, CAT II	2	16	1
7	3	30	2011	1	45	NPG	2	6	1	1	1	1	2			CAT IV	1	2	9	8	NEGATIVE						4	GAIGHATA	45	4	15.7558	169		Not Given		49	50	0.8	1	0.9	17	0	3	2005	GOVERNMENT	CAT I, CAT II	2	21	0
7	3	31	2011	1	27	NPG	2	5	1	1	1	2	2			CAT IV	2	2	9	8	NEGATIVE						4	Sagar Dutta SG Hospital	50	4	17.9282	167		Not Given		52	54	0.7	0.6	0.7	0	29	3	2007	GOVERNMENT	CAT I, CAT II	2	19	0
7	3	32	2011	1	45	CAL	1	6	1	1	1	2	2			CAT IV	2	2	9	8	NEGATIVE						4	Maniktala	60	4	23.1473	161		Not Given		62	63	0.7	0.8	0.7	0	0	1	2009	GOVERNMENT	CAT I	2	5	1
7	3	33	2011	0	28	CAL	1	6	1	1	1	1	1			CAT IV	2	2	9	8	NEGATIVE						4	Alipore CC	53	4	22.0604	155		Not Given		66	72	0.7	0.8	0.7	0	0	1	2010	GOVERNMENT	CAT I	2	5	1
7	3	34	2011	1	65	NPG	1	6	1	1	1	2	1			CAT IV	2	2	9	8	NEGATIVE						4	HABRA	42	3	17.4818	155		Not Given		43	44	1.1	1.1	1.2	9	114	2	2010	GOVERNMENT	CAT I, CAT II	2	6	0
7	3	35	2011	1	42	NPG	1	6	1	1	1	2	2			CAT IV	4	4	4	4	NEGATIVE						4	BARASAT DTC	72	5	24.3375	172		Not Given				0.7			15		1	2010	GOVERNMENT	CAT I	2	5	1
7	3	36	2011	0	30	NPG	2	5	1	1	2	2	2			CAT IV	2	2	9	8	NEGATIVE						4	SUNDARPUR	41	3	17.0656	155		Not Given		46	49	0.8	0.7	0.8	10	2	3	2007	GOVERNMENT	CAT I, CAT II	2	22	0
7	3	37	2011	0	27	NPG	2	6	1	1	1	2	2			CAT IV	1	9	3	3	NEGATIVE						4	AMDANGA BPHC	35	3	13.3364	162		Not Given		30		0.8	0.7	0.7	0		3	2006	GOVERNMENT	CAT I, CAT II	2	22	0
7	3	38	2011	1	42	NPG	2	5	1	1	1	2	2			CAT IV	4	4	4	4	NEGATIVE						4	BARRACKPORE B N BOSE	61	4	19.9184	175		Not Given				1.5			0		2	2009	GOVERNMENT	CAT I, CAT II	2	11	1
7	3	39	2011	1	33	NPG	2	7	1	1	1	1	1			CAT IV	2	2	9	8	NEGATIVE						4	BARASAT DTC	83	5	31.2394	163		Not Given		81	80	0.9	0.8	0.9	0	0	2	2010	GOVERNMENT	ATD, CAT II	2	6	1
7	3	40	2011	0	20	NPG	2	5	1	1	1	1	1			CAT IV	9	9	2	8	NEGATIVE						4	SARAPUL	39	3	17.3333	150		Not Given		39	40	1	1.1	1	11	2	2	2009	GOVERNMENT	CAT I, CAT II	2	11	0
7	3	41	2011	1	17	CAL	1	6	1	1	1	2	1			CAT IV	3	3	3	3	NEGATIVE						4	Manashatala	25	2	10.4058	155		Not Given				0.5			2		1	2010	GOVERNMENT	CAT II	2	6	0
7	3	42	2011	1	42	NPG	2	5	1	1	1	1	2			CAT IV	9	9	2	8	NEGATIVE						4	BONGAON	30	2	13.3333	150		Not Given				0.8			126		2	2010	GOVERNMENT	CAT I, CAT II	2	9	0
7	3	43	2011	0	25	NPG	2	7	1	1	1	2	2			CAT IV	2	2	3	3	NEGATIVE						4	Sagar Dutta SG Hospital	31	2	11.8122	162		Not Given		31	31	1.3	0.7	0.9	0	0	2	2009	GOVERNMENT	CAT I, CAT II	2	6	0
7	3	44	2011	1	21	NPG	1	6	1	1	2	2	2			CAT IV	2	2	2	8	NEGATIVE						4	BHATPARA SGH	44	3	16.1616	165		Not Given		46	47	0.7	0.9	0.8	0	0	2	2009	GOVERNMENT	CAT I, CAT II	2	9	0
1	4	1	2009	1	43	GNT	2	6	1	1	1	2	1			Cat IV	2	2	2	1	NEGATIVE						7	Guntur	50	4	17.9282	167				50	53	0.8	0.8	1.2	0	1	2	2008	GOVERNMENT	Cat I, Cat II	2	15	0
1	4	2	2009	1	58	GNT	2	6	1	1	1	2	2			Cat IV	2	2	2	1	NEGATIVE						4	Guntur	50	4	21.9289	151				49	49	0.9	0.9	1	0	18	2	2008	GOVERNMENT	Cat I, Cat II	2	15	1
1	4	3	2009	1	35	GNT	2	6	1	1	1	1	1			Cat IV	2	2	2	1	NEGATIVE						9	Ponnuru	53	4	18.3391	170				53	53	0.9	0.8	0.8	7	22	2	2007	GOVERNMENT	Cat I, Cat II	2	15	0
1	4	4	2009	1	26	GNT	2	6	1	1	1	2	2			Cat IV	2	2	2	1	NEGATIVE						9	Sattenapalli	55	4	21.4844	160				58	65	0.8	0.9	1	0	0	2	2006	GOVERNMENT	Cat I, Cat II	2	10	1
1	4	5	2009	1	43	KSN	2	6	1	1	1	2	2			Cat IV	2	2	2	8	NEGATIVE						9	Gudivada	42	3	17.9418	153				45	45	0.9	1	1.2	29	67	2	2003	GOVERNMENT	Cat I, Cat II	2	14	0
1	4	6	2009	0	19	KSN	2	6	1	1	1	1	1			Cat IV	2	2	2	8	NEGATIVE						11	Rajiv Nagar	44	3	19.5556	150			above 45	55	53	0.8	0.9	0.9	0	60	2	2008	GOVERNMENT	Cat I, Cat II	2	11	0
1	4	7	2009	1	50	GNT	2	6	1	1	1	1	2			Cat IV	2	2	2	8	NEGATIVE						3	Repalle	38	3	16.4474	152				41	41	0.9	1.1	1.2	5	40	4	2004	GOVERNMENT	Cat III, Cat II, Cat II, Cat II	1	29	1
1	4	8	2009	1	30	GNT	2	6	1	1	1	1	1			Cat IV	2	2	2	1	POSITIVE						9	Pedakakani	36	3	13.2231	165				34	36	0.9	0.9	1	12	0	2	2007	GOVERNMENT	Cat I, Cat II	2	14	0
1	4	9	2009	1	61	KSN	2	6	1	1	1	1	2			Cat IV	2	2	2	8	NEGATIVE						3	Gudivada	59	4	22.2063	163				65	68	0.8	0.9	0.9	19	106	2	2007	GOVERNMENT	Cat I, Cat II	2	14	1
1	4	10	2009	0	37	GNT	2	6	1	1	1	1	2			Cat IV	3	3	3	3	NEGATIVE						11																2	2008	GOVERNMENT	Cat I, Cat II	2	15	0
1	4	11	2009	1	35	EGV	2	6	1	1	1	1	1			Cat IV	1	2	3	3	NEGATIVE						2	Kathipudi	39	3	13.818	168				47		0.9	1.2	2.2	3	0	2	2008	GOVERNMENT	Cat I,Cat II	2	9	0
1	4	12	2009	1	58	GNT	2	6	1	1	1	1	2			Cat IV	1	1	1	3	NEGATIVE						7	Narasaraopet	42	3	16.4063	160				46	46	0.8	0.9	1	26	6	2	2005	GOVERNMENT	Cat I, Cat II	2	10	0
1	4	13	2009	1	40	GNT	2	6	1	1	1	1	2			Cat IV	4	4	4	4	NEGATIVE						10	Vonukonda	56	4	23.9224	153						0.8					2	2007	GOVERNMENT	Cat I, Cat II	2	15	1
1	4	14	2009	1	35	GNT	2	6	1	1	1	1	1			Cat IV	2	2	2	8	NEGATIVE						1	Repalle	34	2	13.7937	157				37	39	1.2	1.1	1.1	43	115	2	2007	GOVERNMENT	Cat I, Cat II	2	15	0
1	4	15	2009	1	40	KSN	2	6	1	1	1	1	1			Cat IV	2	1	1	3	NEGATIVE						10	Rajiv Nagar	43	3	14.7054	171				44	48	0.9	0.8	1	11	58	2	2009	GOVERNMENT	Cat I, Cat II	2	14	0
1	4	16	2009	0	40	WGV	2	6	1	1	1	1	1			Cat IV	2	2	2	1	NEGATIVE						1	L Koderu	49	4	20.6612	154				51	56	0.9	0.8	1.8	34	0	1	2008	GOVERNMENT	Cat II	2	8	0
1	4	17	2009	1	53	WGV	2	6	1	1	1	2	2			Cat IV	3	3	3	3	POSITIVE						9	Eluru	40	3	16.0231	158						1					2	2008	GOVERNMENT	Cat I,Cat II	2	14	0
1	4	18	2009	1	36	GNT	2	6	1	1	1	1	1			Cat IV	9	4	4	4	NEGATIVE						2	Repalle	46	4	17.5278	162						0.8			60		3	2006	GOVERNMENT	Cat I, CatII, Cat II	1	26	0
1	4	19	2009	1	41	KSN	2	6	1	1	1	2	1			Cat IV	9	2	3	3	NEGATIVE						9	Machilipatnam	39	3	14.5003	164				46		0.9	1	0.8	26	22	2	2008	GOVERNMENT	Cat I, Cat II	2	13	0
1	4	20	2009	1	32	KSN	2	5	1	1	1	1	1			Cat IV	2	2	2	8	NEGATIVE						4	Guduru	70	5	25.0995	167				69	70	0.8	1	1.1	5	90	3	2006	GOVERNMENT	Cat I, Cat II, Cat II	1	22	0
1	4	21	2009	1	40	KSN	2	6	1	1	1	2	1			Cat IV	3	3	3	3	POSITIVE						1	Gudivada	50	4	21.0828	154						1			0		2	2007	GOVERNMENT	Cat I,Cat II	2	14	0
1	4	22	2009	0	35	KSN	2	6	1	1	1	1	1			Cat IV	2	2	2	8	NEGATIVE						3	Guduru	40	3	17.5431	151				43	41	0.8	1	1.1	6	91	2	2009	GOVERNMENT	Cat I, Cat II	2	14	0
1	4	23	2009	1	34	GNT	2	6	1	1	1	1	1			Cat IV	9	3	3	3	POSITIVE						9	Sattenapalli	47	4	14.5062	180						0.9	0.2		31		2	2008	GOVERNMENT	Cat I, Cat II	2	14	0
1	4	24	2009	1	55	GNT	2	6	1	1	1	2	2			Cat IV	9	9	4	4	NEGATIVE						2	Vinukonda	69	5	26.2917	162						1	1		74		4	2004	GOVERNMENT	Cat I, Cat II, Cat II, Cat II	1	32	0
1	4	25	2009	1	37	WGV	2	6	1	1	1	1	1			Cat IV	2	2	2	8	POSITIVE						1	Lingapalem	60	4	24.6548	156				51	62	1	1.3	1.3	9	7	2	2007	GOVERNMENT	Cat I,Cat II	2	9	1
1	4	26	2009	0	45	GNT	2	6	1	1	1	1	1			Cat IV	2	2	2	1	NEGATIVE						2	Pedakakani	35	3	13.6719	160				37	37	0.9	1	1.2	0	0	2	2007	GOVERNMENT	Cat I, Cat II	2	14	0
1	4	27	2009	1	45	GNT	2	6	1	1	1	2	1			Cat IV	9	9	3	3	NEGATIVE						5	Guntur	39	3	17.3333	150				39		0.9	1		89		2	2007	GOVERNMENT	Cat I, Cat II	2	14	1
1	4	28	2009	1	19	GNT	2	6	1	1	1	2	2			Cat IV	2	2	2	8	NEGATIVE						9	Vinukonda	50	4	19.052	162				58	59	0.9	1	0.8	0	0	2	2008	GOVERNMENT	Cat I, Cat II	2	9	0
1	4	29	2009	1	39	GNT	2	6	1	1	1	2	1			Cat IV	9	9	4	4	NEGATIVE						5	Guntur	63	4	21.7993	170						0.9	1		62		2	2008	GOVERNMENT	Cat I, Cat II	2	12	1
1	4	30	2009	1	28	KSN	2	6	1	1	1	2	2			Cat IV	2	2	2	8	NEGATIVE						1	Rajiv Nagar	60	4	18.5185	180				74	76	0.8	0.9	0.9	0	61	2	2009	GOVERNMENT	Cat I, Cat II	2	14	0
1	4	31	2009	1	20	KSN	2	6	1	1	1	2	1			Cat IV	2	2	2	1	NEGATIVE						9	Gannavaram	50	4	18.1449	166				56	55	0.7	1.2	1.1	13	2	2	2006	GOVERNMENT	Cat I, Cat II	2	16	0
1	4	32	2009	1	56	KSN	2	6	1	1	1	1	1			Cat IV	2	2	2	8	NEGATIVE						6	Rajiv Nagar	60	4	20.5191	171				56	58	0.9	1.8		0	48	2	2008	GOVERNMENT	Cat I, Cat II	2	8	0
1	4	33	2009	1	38	KSN	2	6	1	1	1	1	1			Cat IV	2	2	2	8	NEGATIVE						3	Rajiv Nagar	45	4	18.4911	156				47	46	0.8	1	1	0	60	2	2009	GOVERNMENT	Cat I, Cat II	2	11	0
1	4	34	2009	0	65	KSN	2	6	1	1	1	1	1			Cat IV	2	2	1	8	NEGATIVE						11	Machilipatnam	37	3	15.8059	153				41	42	0.8	0.8	0.4	0	33	2	2008	GOVERNMENT	Cat I, Cat II	2	14	0
1	4	35	2009	0	45	EGV	2	6	1	1	1	1	1			Cat IV	9	3	3	3	NEGATIVE						9	Jaggampet	47	4	19.563	155						0.8					1	2006	GOVERNMENT	Cat II	2	5	1
1	4	36	2009	1	66	EGV	2	6	1	1	1	1	1			Cat IV	2	2	2	8	NEGATIVE						11	P. Gannavaram	73	5	28.8754	159				65	65	1	0.9	0.8	0	39	2	2005	GOVERNMENT	Cat I, Cat II	2	9	1
1	4	37	2009	1	52	EGV	2	6	1	1	1	1	2			Cat IV	1	1	2	8	NEGATIVE						11	P. Gannavaram	56	4	21.3382	162				60	63	0.8	1.4	0.7	8	53	2	2005	GOVERNMENT	Cat I,Cat II	2	11	0
1	4	38	2009	1	55	GNT	2	6	1	1	1	1	1			Cat IV	2	2	2	4	NEGATIVE						9	Gurazala	54	4	23.3726	152				58	62	0.9	1.1	1.2	10	74	2	2008	GOVERNMENT	Cat I, Cat II	2	11	0
1	4	39	2009	1	61	WGV	2	6	1	1	1	1	1			Cat IV	2	2	2	8	NEGATIVE						1	V R Gudem	44	3	18.5529	154				45	46	0.9	0.8	0.9	41	0	1	2008	GOVERNMENT	Cat II	2	4	0
1	4	40	2009	1	27	KSN	2	6	1	1	1	1	1			Cat IV	2	2	2	8	NEGATIVE						9	Machilipatnam	43	3	18.6115	152				45	47	0.9	1	0.9	10	14	2	2007	GOVERNMENT	Cat I, Cat II	2	13	0
1	4	41	2009	0	30	GNT	2	6	1	1	1	1	1			Cat IV	2	2	2	8	NEGATIVE						1	Tenali	45	4	20.8247	147				45	45	0.8	0.9	1	19	96	2	2008	GOVERNMENT	Cat I, Cat II	2	10	0
1	4	42	2009	0	25	GNT	2	6	1	1	1	1	1			Cat IV	2	2	2	8	NEGATIVE						3	Tenali	32	2	19.84	127				34	35	0.9	1	1	2	68	1	2008	GOVERNMENT	Cat II	2	6	0
1	4	43	2009	0	28	EGV	2	6	1	1	1	1	1			Cat IV	2	2	2	8	NEGATIVE						11	Mummadivaram	60	4	23.7332	159				55	54	0.8	1.1	1.4	145	28	2	2008	GOVERNMENT	Cat I,Cat II	2	9	0
1	4	44	2009	1	40	EGV	2	6	1	1	1	1	1			Cat IV	2	2	2	8	NEGATIVE						4	Kakinada	44	3	17.4044	159				44	44	1	0.9	1.1	11	113	1	2008	GOVERNMENT	CatII	2	9	1
1	4	45	2009	1	40	EGV	2	6	1	1	1	1	1			Cat IV	2	1	4	4	NEGATIVE						1	Mummadivaram	44	3	18.0802	156				44		0.9	0.7	1.1	63		1	2009	GOVERNMENT	Cat I	2	5	0
1	4	46	2009	1	46	GNT	2	6	1	1	1	1	1			Cat IV	4	4	4	4	NEGATIVE						1	Macherla	52	4	22.806	151						0.8			75		2	2007	GOVERNMENT	Cat I, Cat II	2	15	0
1	4	47	2009	0	36	GNT	2	6	1	1	1	1	1			Cat IV	1	3	3	3	NEGATIVE						2	Gurazala	32	2	13.493	154				36		1	1	1	11		2	2008	GOVERNMENT	Cat I, Cat II	2	14	0
1	4	48	2009	0	32	WGV	2	6	1	1	1	1	1			Cat IV	2	2	2	3	NEGATIVE						9	V R Gudem	41	3	17.5146	153				46	49	0.2	1	1	81	0	2	2009	GOVERNMENT	Cat I,Cat II	2	9	0
1	4	49	2009	1	45	WGV	2	6	1	1	1	1	1			Cat IV	2	2	2	3	NEGATIVE						2	Eluru	44	3	19.0443	152				46	47	1.3	1.1	1	31	37	1	2008	GOVERNMENT	Cat I	2	6	0
1	4	50	2009	1	45	WGV	2	6	1	1	1	1	1			Cat IV	2	2	1	8	NEGATIVE						2	Koyyalagudem	35	3	14.0202	158				38	43	1	1.2	1.2	77	8	2	2008	GOVERNMENT	Cat I,Cat II	2	9	0
1	4	51	2009	1	38	GNT	2	6	1	1	1	2	2			Cat IV	4	4	4	4	NEGATIVE						11	Vinukonda	49	4	16	175						0.8	1		60		2	2008	GOVERNMENT	Cat I, Cat II	2	13	1
1	4	52	2009	0	45	KSN	2	6	1	1	1	1	1			Cat IV	3	3	3	3	NEGATIVE						1	Gannavaram	40	3	17.7778	150						1.1			0		2	2003	GOVERNMENT	Cat I, Cat II	2	12	1
1	4	53	2009	1	37	KSN	2	6	1	1	1	1	1			Cat IV	2	2	2	8	NEGATIVE						10	Rajiv Nagar	45	4	20.5442	148				46	52	0.8	0.9	1	0	59	2	2009	GOVERNMENT	Cat I, Cat II	2	11	1
1	4	54	2009	1	45	KSN	2	6	1	1	1	1	1			Cat IV	2	2	2	8	NEGATIVE						3	Gudivada	41	3	17.7458	152				46	44	1	1.3	1.5	64	113	2	2007	GOVERNMENT	Cat I, Cat II	2	14	0
1	4	1	2010	1	40	EGV	2	6	1	1	1	1	1			Cat IV	2	2	2	8	NEGATIVE						1	kathipudi	45	4	17.5781	160				50	54	0.8	1	1.7	3	38	1	2008	GOVERNMENT	Cat II	2	12	0
1	4	2	2010	1	41	KSN	2	5	1	1	1	1	1			Cat IV	3	3	3	3	NEGATIVE						3	Nandigama	43	3	18.1312	154				30		0.6	0.5	0.6	0		2	2008	GOVERNMENT	Cat I, Cat II	2	13	1
1	4	3	2010	1	18	GNT	2	6	1	1	1	1	1			Cat IV	4	4	4	4	NEGATIVE						7	Narasaraopet	59	4	20.6575	169						0.7			62		2	2008	GOVERNMENT	Cat I, Cat II	2	13	0
1	4	4	2010	1	35	GNT	2	6	1	1	1	1	1			Cat IV	2	2	2	8	NEGATIVE						5	Guntur	47	4	15.7038	173				50	62	0.8	0.7	0.7	5	0	2	2009	GOVERNMENT	Cat I, Cat II	2	13	1
1	4	5	2010	1	61	KSN	2	6	1	1	1	1	1			Cat IV	4	4	4	4	NEGATIVE						3	Rajiv Nagar	63	4	21.7993	170						0.9	0.8		83		2	2008	GOVERNMENT	Cat I, Cat II	2	11	1
1	4	6	2010	0	41	KSN	2	6	1	1	1	1	1			Cat IV	3	3	3	3	NEGATIVE						1	Rajiv Nagar	42	3	23.0453	135						0.8			0		2	2008	GOVERNMENT	Cat I, Cat II	2	13	1
1	4	7	2010	0	46	KSN	2	6	1	1	1	1	1			Cat IV	1	1	4	4	NEGATIVE						4	Nandigama	30	2	14.4676	144				32		0.9	0.6		62		2	2007	GOVERNMENT	Cat I, Cat II	2	15	1
1	4	8	2010	1	62	KSN	2	6	1	1	1	2	1			Cat IV	2	2	2	8	NEGATIVE						1	Machilipatnam	72	5	23.7812	174				83	90	0.8	0.9	0.8	0	8	3	2007	GOVERNMENT	Cat I, Cat II, Cat II	1	22	1
1	4	9	2010	1	40	KSN	2	6	1	1	1	1	1			Cat IV	2	2	2	8	POSITIVE						9	Vijayawada	61	4	22.68	164				69	73	0.8	1	1.2	0	41	2	2009	GOVERNMENT	Cat I, Cat II	2	11	1
1	4	10	2010	1	22	WGV	2	6	1	1	1	2	1			Cat IV	2	1	1	3	NEGATIVE						4	V R Gudem	40	3	14.1723	168				40	40	0.9	1.2	0.9	98	0	2	2007	GOVERNMENT	Cat I,Cat II	2	9	1
1	4	11	2010	0	30	WGV	2	6	1	1	1	2	1			Cat IV	2	1	1	4	NEGATIVE						2	V R Gudem	31	2	13.7778	150				38	35	1.2	1	0.9	87	0	2	2008	GOVERNMENT	Cat I,Cat II	2	8	0
1	4	12	2010	0	38	WGV	2	6	1	1	1	1	1			Cat IV	1	1	1	8	NEGATIVE						4	Malakpalli	39	3	24.5654	126				38	36	1	1.2	1.1	54	43	2	2008	GOVERNMENT	Cat I,Cat II	2	9	1
1	4	13	2010	0	40	EGV	2	6	1	1	1	1	1			Cat IV	2	2	2	8	NEGATIVE						9	Jaggampet	30	2	14.0739	146				33	33	1	0.5	0.5	17	52	2	2007	GOVERNMENT	CatI,Cat II	2	11	1
1	4	14	2010	0	19	EGV	2	7	1	1	1	1	1			Cat IV	2	2	1	3	NEGATIVE						9	Ramavaram	21	1	9.71817	147				25		0.8	0.7	0.7	2	1	1	2008	GOVERNMENT	Cat II	2	8	0
1	4	15	2010	1	55	WGV	2	5	1	1	1	1	1			Cat IV	4	4	4	4	NEGATIVE						9	Eluru	54	4	21.3599	159						1	1.9		60		1	2008	GOVERNMENT	Cat II	2	8	1
1	4	16	2010	1	36	WGV	2	6	1	1	1	1	1			Cat IV	2	2	2	8	NEGATIVE						9	Kanuru	44	3	16.7657	162				48	50	0.8	1.1	1	28	0	1	2007	GOVERNMENT	Cat II	2	8	0
1	4	17	2010	1	60	KSN	2	6	1	1	1	1	1			Cat IV	2	2	2	8	NEGATIVE						4	Challapalli	44	3	16.7657	162				47	47	1.2	1.4	0.9	24	41	2	2010	GOVERNMENT	Cat I, Cat II	2	12	0
1	4	18	2010	1	65	GNT	2	6	1	1	1	2	2			Cat IV	2	2	2	8	NEGATIVE						9	Ponnuru	53	4	20.1951	162				55	55	0.8	0.9	0.9	3	16	2	2009	GOVERNMENT	Cat I, Cat II	2	8	0
1	4	19	2010	1	38	GNT	2	6	1	1	1	2	1			Cat IV	2	2	2	8	NEGATIVE						9	Macherla	38	3	15.8169	155				45	45	0.9	1	1	0	4	2	2007	GOVERNMENT	Cat I, Cat II	2	14	0
1	4	20	2010	1	60	GNT	2	6	1	1	1	1	1			Cat IV	2	2	2	8	NEGATIVE						10	Ponnuru	42	3	17.4818	155				45	46	0.9	1.1	0.8	0	7	2	2007	GOVERNMENT	Cat I, Cat II	2	14	0
1	4	21	2010	0	37	GNT	2	6	1	1	1	2	1			Cat IV	2	2	2	8	NEGATIVE						4	Guntur	44	3	19.2974	151				46	47	0.9	0.8	0.8	4	0	2	2009	GOVERNMENT	Cat I, Cat II	2	14	0
1	4	22	2010	0	36	GNT	2	6	1	1	1	1	1			Cat IV	2	2	2	8	NEGATIVE						1	Narasaraopet	38	3	20.2462	137				36	36	1	1.5	1	54	11	2	2007	GOVERNMENT	Cat I, Cat II	2	14	0
1	4	23	2010	1	66	GNT	2	6	1	1	1	1	1			Cat IV	4	4	4	4	NEGATIVE						9	Narasaraopet	43	3	17.2248	158						1			62		1	2009	GOVERNMENT	Cat II	2	8	0
1	4	24	2010	1	24	GNT	2	7	1	1	1	2	2			Cat IV	1	1	3	3	NEGATIVE						10	Repalle	35	3	15.5556	150				39		1.2	1	1	103		3	2003	GOVERNMENT	Cat I, Cat II, Cat II	1	20	0
1	4	25	2010	1	30	KSN	2	6	1	1	1	1	2			Cat IV	2	2	2	8	NEGATIVE						4	Challapalli	55	4	20.9572	162				56	56	1	1.5	0.8	74	0	3	2006	GOVERNMENT	Cat I, Cat II, Cat II	1	21	0
1	4	26	2010	1	45	WGV	2	6	1	1	1	1	1			Cat IV	2	2	4	4	NEGATIVE						10	Koyyalagudem	55	4	21.4844	160				59	61	1.8	1.1	1.6	54	60	1	2008	GOVERNMENT	Cat II	2	10	1
1	4	27	2010	1	38	WGV	2	6	1	1	1	1	2			Cat IV	2	2	1	8	NEGATIVE						1	V R Gudem	39	3	16.2331	155				42	42	0.9	0.9	1	12	0	2	2008	GOVERNMENT	Cat I,Cat II	2	8	0
1	4	28	2010	1	30	WGV	2	5	1	1	1	1	1			Cat IV	4	4	4	4	NEGATIVE						9	V R Gudem	64	4	21.6333	172						1	1		86		2	2009	GOVERNMENT	Cat I,Cat II	2	8	0
1	4	29	2010	0	50	GNT	2	5	1	1	1	1	1			Cat IV	1	4	4	4	NEGATIVE						1	Pedakakani	32	2	14.2222	150				33		0.8	0.9	1	72		2	2008	GOVERNMENT	Cat I,Cat II	2	5	0
1	4	31	2010	1	61	KSN	2	6	1	1	1	1	1			Cat IV	2	2	3	3	NEGATIVE						11	Rajiv Nagar	35	3	13.6719	160				38		1	0.8	0.9	0		2	2008	GOVERNMENT	Cat I, Cat II	2	14	1
1	4	32	2010	0	26	GNT	2	6	1	1	1	1	1			Cat IV	2	2	2	8	NEGATIVE						9	Tenali	43	3	19.1111	150				44	45	0.8	1.2	1	0	16	2	2008	GOVERNMENT	Cat I, Cat II	2	14	0
1	4	33	2010	1	37	KSN	2	6	1	1	1	1	1			Cat IV	2	2	1	8	NEGATIVE						10	Nuzividu	42	3	13.7143	175				46	48	1	1	0.9	45	10	2	2007	GOVERNMENT	Cat I, Cat II	2	15	0
1	4	34	2010	0	30	WGV	2	6	1	1	1	1	1			Cat IV	2	1	1	4	NEGATIVE						11	Eluru	35	3	13.6719	160				38	39	0.9	1	1	0	60	2	2008	GOVERNMENT	Cat I, Cat II	2	8	0
1	4	35	2010	1	55	WGV	2	6	1	1	1	1	1			Cat IV	4	4	4	4	NEGATIVE						11	Eluru	60	4	23.4375	160						1			60		1	2009	GOVERNMENT	Cat I	2	6	1
1	4	36	2010	1	31	EGV	2	5	1	1	1	1	1			Cat IV	2	2	2	4	NEGATIVE						2	Mummidivaram	48	4	17.2111	167				47	50	0.8	0.9	1	49	28	1	2009	GOVERNMENT	Cat II	2	6	0
1	4	37	2010	1	41	EGV	2	6	1	1	1	2	1			Cat IV	2	2	2	8	NEGATIVE						11	Kakinada	41	3	16.0156	160				50	48	1	0.8	0.9	4	150	1	2009	GOVERNMENT	Cat II	2	9	1
1	4	38	2010	0	28	EGV	2	6	1	1	1	1	1			Cat IV	2	2	2	8	NEGATIVE						1	Ramavaram	51	4	21.2279	155				56	58	0.8	0.6	0.9	56	17	2	2009	GOVERNMENT	Cat III,Cat II	2	8	0
1	4	39	2010	1	35	EGV	1	6	1	1	1	2	1			Cat IV	2	2	2	8	NEGATIVE						2	Mummidivaram	45	4	17.5781	160				45	44	0.8	1	1.2	0	4	2	2009	GOVERNMENT	Cat I, Cat II	2	9	0
1	4	40	2010	1	47	KSN	2	6	1	1	1	1	1			Cat IV	2	2	2	8	NEGATIVE						1	Vijayawada	58	4	24.1415	155				60	64	0.8	0.9	0.9	43	10	2	2009	GOVERNMENT	Cat I, Cat II	2	15	1
1	4	41	2010	1	54	KSN	1	6	1	1	1	2	2			Cat IV	2	2	2	8	NEGATIVE						2	Challapalli	48	4	18.75	160				47	48	1	1	1	73	0	2	2009	GOVERNMENT	Cat I, Cat II	2	14	0
1	4	42	2010	1	69	KSN	2	6	1	1	1	2	2			Cat IV	4	4	4	4	NEGATIVE						1	Gannavaram	62	4	23.9188	161						0.9			63		2	2008	GOVERNMENT	Cat I, Cat II	2	10	1
1	4	43	2010	0	50	KSN	2	6	1	1	1	2	1			Cat IV	1	1	3	3	NEGATIVE						10	Rajiv Nagar	34	2	18.6557	135				39		1	1	1	60		2	2009	GOVERNMENT	Cat I, Cat II	2	11	1
1	4	44	2010	1	47	KSN	2	6	1	1	1	1	1			Cat IV	2	2	2	8	POSITIVE						3	Gudivada	68	5	24.677	166				73	75	1.2	1	0.9	42	33	2	2008	GOVERNMENT	Cat I, Cat II	2	10	1
1	4	45	2010	1	31	KSN	2	6	1	1	1	1	1			Cat IV	1	2	1	8	NEGATIVE						9	Nandigama	45	4	17.5781	160				46	42	0.9	0.8	0.8	9	34	2	2007	GOVERNMENT	Cat I, Cat II	2	15	0
1	4	46	2010	1	34	KSN	2	6	1	1	1	2	1			Cat IV	2	2	2	8	NEGATIVE						1	Gudivada	60	4	21.2585	168				67	70	0.9	1.2	0.9	99		2	2008	GOVERNMENT	Cat I, Cat II	2	14	0
1	4	47	2010	1	45	GNT	2	6	1	1	1	2	2			Cat IV	2	2	2	8	NEGATIVE						1	Narasaraopet	60	4	22.0386	165				64	63	2	1	1	4	7	2	2009	GOVERNMENT	Cat III, Cat II	2	12	0
1	4	48	2010	1	31	GNT	2	6	1	1	1	2	2			Cat IV	2	2	2	8	NEGATIVE						10	Narasaraopet	43	3	15.7943	165				49	46	1	0.9	1	8	18	2	2006	GOVERNMENT	Cat I, Cat II	2	14	0
1	4	49	2010	1	51	GNT	1	6	1	1	1	1	1			Cat IV	4	4	4	4	NEGATIVE						3	Guntur	52	4	17.5771	172						1.2			60		2	2009	GOVERNMENT	Cat I, Cat II	2	10	0
1	4	50	2010	1	46	GNT	2	6	1	1	1	1	1			Cat IV	4	4	4	4	NEGATIVE						3	Guntur	54	4	19.5965	166						0.8			95		3	2008	GOVERNMENT	Cat I, Cat II, Cat II	1	16	0
1	4	52	2010	0	65	GNT	2	6	1	1	1	1	2			Cat IV	4	4	4	4	NEGATIVE						10	Repalle	58	4	21.3039	165						1.2			79		1	2009	GOVERNMENT	Cat I	2	7	1
1	4	53	2010	1	22	KSN	2	6	1	1	1	1	1			Cat IV	1	2	1	8	NEGATIVE						1	Nuzividu	48	4	18.2899	162				50	50	0.8	0.7	0.8	23	27	3	2006	GOVERNMENT	Cat I, Cat II, Cat II	1	24	0
1	4	54	2010	1	53	KSN	2	6	1	1	1	1	1			Cat IV	4	4	4	4	NEGATIVE						3	Nuzividu	62	4	22.7732	165						1.2			60		2	2008	GOVERNMENT	Cat I, Cat II	2	15	1
1	4	55	2010	1	32	WGV	2	6	1	1	1	1	1			Cat IV	2	2	2	3	NEGATIVE						10	L Koderu	53	4	17.7086	173				58	59	1	1	0.9	26	0	2	2009	GOVERNMENT	Cat I, Cat II	2	9	0
1	4	56	2010	1	42	EGV	2	6	1	1	1	1	1			Cat IV	1	2	2	8	NEGATIVE						2	Kattipudi	40	3	14.6924	165				45	47	1.2	1.5	1.6	2	19	1	2009	GOVERNMENT	Cat I,	2	6	0
1	4	57	2010	1	48	EGV	1	6	1	1	1	1	1			Cat IV	2	2	4	4	NEGATIVE						2	P Gannavaram	45	4	17.5781	160						0.9	1		70		2	2008	GOVERNMENT	Cat I, Cat II	2	10	0
1	4	58	2010	1	23	EGV	2	6	1	1	1	1	1			Cat IV	2	2	2	8	NEGATIVE						11	Jaggampet	44	3	15.7768	167				45	45	0.8	1	1.4	2	43	2	2009	GOVERNMENT	Cat I, Cat II	2	9	0
1	4	59	2010	1	30	EGV	2	5	1	1	1	1	1			Cat IV	2	2	2	8	NEGATIVE						11	Jaggampet	49	4	18.9036	161				51	52	0.9	0.8	1.2	4	42	1	2009	GOVERNMENT	Cat II	2	8	0
1	4	60	2010	0	31	EGV	2	6	1	1	1	1	1			Cat IV	2	2	2	8	NEGATIVE						11	Kakinada	29	2	12.7187	151				30	30	1	0.9	0.8	0	0	2	2009	GOVERNMENT	Cat I, Cat II	2	9	0
1	4	61	2010	1	35	WGV	2	6	1	1	1	1	1			Cat IV	2	2	2	8	NEGATIVE						11	Lingapalem	45	4	17.1468	162				46	49	0.8	1	1	0	0	2	2008	GOVERNMENT	Cat I, Cat II	2	8	0
1	4	62	2010	1	45	KSN	2	6	1	1	1	1	1			Cat IV	2	2	2	8	NEGATIVE						1	Nandigama	45	4	15.9439	168				45	44	0.9	0.8	0.9	36	9	2	2007	GOVERNMENT	Cat I, Cat II	2	16	0
1	4	63	2010	1	23	GNT	2	6	1	1	1	1	1			Cat IV	2	2	2	8	NEGATIVE						5	Gurazala	33	2	13.219	158				37	39	0.8	0.9	1	4	60	2	2009	GOVERNMENT	Cat I, Cat II	2	12	0
1	4	64	2010	1	46	GNT	2	6	1	1	1	1	1			Cat IV	2	2	1	8	NEGATIVE						5	Guntur	40	3	13.8408	170				43	42	1	0.9	0.8	0	2	3	2008	GOVERNMENT	Cat I, Cat II, Cat II	1	22	0
1	4	65	2010	1	40	GNT	2	6	1	1	1	1	2			Cat IV	2	2	1	8	NEGATIVE						2	Ponnuru	35	3	13.3364	162				40	42	1.2	0.6	1.2	2	1	3	2008	GOVERNMENT	Pvt., Cat II, Cat II	1	21	0
1	4	66	2010	0	30	GNT	2	6	1	1	1	1	1			Cat IV	2	2	2	8	NEGATIVE						9	Pedakakani	35	3	14.5682	155				37	38	0.9	1.1	0.9	2	0	2	2007	GOVERNMENT	Cat I, Cat II	2	14	0
1	4	67	2010	1	51	WGV	2	6	1	1	1	1	1			Cat IV	1	4	4	4	NEGATIVE						3	Eluru	30	2	11.5736	161						1			92		1	2009	GOVERNMENT	Cat I	2	6	0
1	4	68	2010	1	40	KSN	2	6	1	1	1	1	2			Cat IV	2	2	2	8	NEGATIVE						1	Challapalli	35	3	15.3502	151				37	39	1.2	0.9	1	49	0	2	2005	GOVERNMENT	Cat I, Cat II	2	14	1
1	4	69	2010	0	43	KSN	2	6	1	1	1	1	1			Cat IV	2	1	3	3	NEGATIVE						1	Gudivada	30	2	13.3333	150				28	27	0.8	0.9	0.9	37	0	1	2008	GOVERNMENT	Cat II	2	8	0
1	4	70	2010	1	42	KSN	2	6	1	1	1	2	2			Cat IV	4	4	4	4	NEGATIVE						1	Gannavaram	65	5	21.9713	172						1			62		2	2008	GOVERNMENT	Cat I, Cat II	2	14	1
1	4	71	2010	1	65	KSN	2	6	1	1	1	1	1			Cat IV	2	2	2	8	NEGATIVE						11	Rajiv Nagar	42	3	17.4818	155				40	43	0.8	0.9	1	54	22	2	2009	GOVERNMENT	Cat I, Cat II	2	11	1
1	4	72	2010	1	32	GNT	2	6	1	1	1	1	1			Cat IV	2	2	1	8	NEGATIVE						9	Macherla	40	3	14.0051	169				45	46	0.8	0.9	0.8	0	13	2	2008	GOVERNMENT	Cat I, Cat II	2	12	0
1	4	73	2010	1	50	GNT	2	6	1	1	1	1	1			Cat IV	2	2	2	8	POSITIVE						1	Gurazala	35	3	15.5556	150				39	41	0.9	1	0.9	22	63	2	2009	GOVERNMENT	Cat I, Cat II	2	11	0
1	4	75	2010	0	36	GNT	2	6	1	1	1	2	1			Cat IV	1	1	1	4	POSITIVE						1	Narasaraopet	47	4	20.8889	150				50	49	0.9	1	1	13	70	3	2008	GOVERNMENT	Cat I, Cat II, Cat II	1	20	0
1	4	76	2010	0	53	KSN	2	6	1	1	1	1	1			Cat IV	2	2	2	8	NEGATIVE						2	Challapalli	35	3	16.6468	145				37	39	0.9	1	1	43	0	2	2009	GOVERNMENT	Cat I, Cat II	1	8	0
1	4	77	2010	1	40	EGV	2	6	1	1	1	1	1			Cat IV	2	2	2	8	NEGATIVE						11	Kakinada	42	3	15.427	165				45	46	0.9	0.8	0.9	0	0	1	2009	GOVERNMENT	Cat II	2	9	0
1	4	78	2010	1	50	EGV	2	6	1	1	1	1	1			Cat IV	2	2	2	8	NEGATIVE						2	Karapa	40	3	15.0551	163				43	43	0.9	1	0.9	1	2	2	2005	GOVERNMENT	Cat I, Cat II	2	9	0
1	4	79	2010	1	41	WGV	2	6	1	1	1	1	2			Cat IV	4	4	4	4	NEGATIVE						4	Koyyalagudem	44	3	26.4407	129						1			60		2	2007	GOVERNMENT	Cat I, Cat II	2	8	0
1	4	80	2010	1	26	GNT	2	7	1	1	1	1	1			Cat IV	2	2	2	8	NEGATIVE						11	Ponnuru	40	3	16.0231	158				42	43	0.8	0.8	0.8	0	7	2	2009	GOVERNMENT	Cat I, Cat II	2	10	0
1	4	81	2010	0	29	EGV	2	6	1	1	2	2	1			Cat IV	2	2	2	8	POSITIVE						11	Jaggampet	59	4	24.5578	155				59	59	0.9	0.9	1.4	9	11	2	2009	GOVERNMENT	Cat I, Cat II	2	15	1
1	4	82	2010	0	18	EGV	2	6	1	1	1	2	2			Cat IV	2	2	2	8	NEGATIVE						1	Karapa	50	4	23.7812	145				50	52	0.8	0.7	0.7	0	6	2	2009	GOVERNMENT	Cat I, Cat II	2	10	0
1	4	83	2010	1	55	EGV	2	6	1	1	1	2	1			Cat IV	2	2	2	8	NEGATIVE						3	Mummidivaram	70	5	24.2215	170				68	70	0.9	1.1	1.2	1	0	2	2009	GOVERNMENT	Cat I, Cat II	2	15	1
1	4	84	2010	0	35	EGV	2	6	1	1	1	1	1			Cat IV	2	2	2	8	NEGATIVE						2	Mummidivaram	41	3	16.4237	158				45	46	0.8	1	1	0	0	2	2009	GOVERNMENT	Cat I, Cat II	2	9	0
1	4	85	2010	1	20	WGV	2	6	1	1	1	1	1			Cat IV	2	2	2	8	NEGATIVE						2	Eluru	32	2	15.22	145				37	38	1.2	0.8	1.2	0		1	2009	GOVERNMENT	Cat I	2	6	0
1	4	86	2010	1	27	WGV	2	6	1	1	1	1	1			Cat IV	3	3	3	3	NEGATIVE						5	Eluru	43	3	16.7969	160						1.2	1		0		1	2009	GOVERNMENT	Cat I	2	6	0
1	4	87	2010	1	25	GNT	2	6	1	1	1	1	1			Cat IV	2	2	1	8	NEGATIVE						9	Vinukonda	46	4	17.9688	160				56	58	0.9	1	1.9	1	29	2	2009	GOVERNMENT	Cat I, Cat II	2	8	0
1	4	88	2010	0	65	GNT	2	6	1	1	1	1	1			Cat IV	2	2	2	8	NEGATIVE						9	Ponnuru	38	3	14.8438	160				39	40	0.8	0.8	0.8	0	0	2	2008	GOVERNMENT	Cat I, Cat II	2	9	0
1	4	89	2010	1	35	GNT	2	6	1	1	1	1	1			Cat IV	2	2	2	8	NEGATIVE						9	Macherla	49	4	20.3954	155				46	51	0.9	1	0.9	0	23	2	2009	GOVERNMENT	Cat I, Cat II	2	11	0
1	4	90	2010	1	50	KSN	2	6	1	1	1	1	2			Cat IV	2	2	2	8	NEGATIVE						2	Guduru	56	4	24.8889	150				59	60	1.2	1	1	0	0	3	2002	GOVERNMENT	Cat I, Cat II, Cat II	1	22	1
1	4	91	2010	1	45	WGV	2	6	1	1	1	1	1			Cat IV	2	2	2	8	NEGATIVE						9	Kalla	66	5	31.3912	145				67	71	0.8	1	0.8	0		2	2009	GOVERNMENT	Cat I, Cat II	2	9	1
1	4	92	2010	1	29	WGV	2	6	1	1	1	1	1			Cat IV	2	2	2	8	NEGATIVE						9	Kanuru	60	4	23.4375	160				68	71	0.8	1	0.9	0	0	1	2006	GOVERNMENT	CatII	2	5	0
1	4	93	2010	1	40	WGV	2	5	1	1	1	1	2			Cat IV	2	2	2	8	NEGATIVE						9	Kanuru	49	4	20.3954	155				57	58	1.2	1.1	1.1	0	0	1	2008	GOVERNMENT	CatII	2	9	1
1	4	94	2010	1	52	WGV	2	6	1	1	1	1	1			Cat IV	2	2	3	3	NEGATIVE						2	Eluru	46	4	21.8787	145				48		1.2	1.1	1	8	30	1	2010	GOVERNMENT	CatII	2	8	0
1	4	95	2010	1	66	GNT	2	6	1	1	1	2	2			Cat IV	2	2	2	8	NEGATIVE						1	Guntur	44	3	22.449	140				47	48	0.8	1	1.2	0	0	2	2008	GOVERNMENT	Cat I, Cat II	2	14	0
1	4	96	2010	0	19	KSN	2	6	1	1	1	1	1			Cat IV	2	2	2	8	NEGATIVE						1	Gudivada	40	3	17.5431	151				39	45	0.8	0.9	0.9	13	0	2	2008	GOVERNMENT	Cat I, Cat II	2	11	0
1	4	97	2010	0	55	KSN	2	6	1	1	1	1	1			Cat IV	2	2	2	8	NEGATIVE						2	Guduru	33	2	15.6956	145				36	36	1	0.9	0.9	0	21	2	2009	GOVERNMENT	Cat I, Cat II	2	14	0
1	4	98	2010	1	25	KSN	2	6	1	1	1	1	1			Cat IV	3	3	3	3	NEGATIVE						3	Nandigama	49	4	17.9982	165						0.8	0.8		20		2	2007	GOVERNMENT	Cat I, Cat II	2	15	0
1	4	100	2010	0	25	GNT	2	6	1	1	1	1	1			Cat IV	2	2	2	8	NEGATIVE						9	Ponnuru	31	2	12.1094	160				33	33	1.6	1.6	0.8	0	0	2	2010	GOVERNMENT	Cat I, Cat II	2	10	0
1	4	101	2010	1	40	GNT	2	6	1	1	1	1	1			Cat IV	2	2	2	8	NEGATIVE						9	Ponnuru	55	4	20.202	165				55	55	0.9	0.9	1	11	11	2	2010	GOVERNMENT	Cat I, Cat II	2	10	0
1	4	102	2010	1	63	EGV	2	6	1	1	1	1	1			Cat IV	1	4	4	4	NEGATIVE						4	Mummidivaram	35	3	16.6468	145						0.8			97		2	2008	GOVERNMENT	Cat I, Cat II	2	9	0
1	4	103	2010	0	23	EGV	2	6	1	1	1	1	1			Cat IV	2	2	2	8	NEGATIVE						3	Karapa	45	4	22.9592	140				50	50	1.6	0.9	0.8	0	5	2	2009	GOVERNMENT	Cat I, Cat II	2	10	0
1	4	104	2010	1	14	WGV	2	6	1	1	1	2	1			Cat IV	1	3	3	3	NEGATIVE						1	V R Gudem	22	1	12.0713	135						0.8	1	1	0		2	2009	GOVERNMENT	Cat I, Cat II	2	9	0
1	4	1	2011	1	40	GNT	2	6	1	1	1	2	1			Cat IV	4	4	4	4	NEGATIVE						5	Guntur	55	4	19.0311	170						0.8	0.9		113		2	2008	GOVERNMENT	Cat I, Cat II	2	14	0
1	4	2	2011	1	26	GNT	2	6	1	1	1	2	1			Cat IV	2	2	2	8	NEGATIVE						3	Guntur	47	4	15.887	172				48	50	0.8	0.9	0.8	0	0	2	2009	GOVERNMENT	Cat I, Cat II	2	14	0
1	4	3	2011	1	25	EGV	1	6	1	1	1	1	1			Cat IV	2	2	3	3	NEGATIVE						9	Kathipudi	38	3	14.1285	164				38		1.2					2	2010	GOVERNMENT	Cat I, Cat II	2	9	0
1	4	4	2011	1	60	KSN	2	6	1	1	1	1	1			Cat IV	2	2	2	8	NEGATIVE						9	Rajiv Nagar	47	4	16.456	169				49	65	1.2	0.9	1	24	0	2	2009	GOVERNMENT	Cat I, Cat II	2	11	0
1	4	5	2011	0	20	KSN	2	6	1	1	1	1	1			Cat IV	3	3	3	3	NEGATIVE						10	Rajiv Nagar	20	1	10.9739	135						0.9			22		2	2010	GOVERNMENT	Cat I, Cat II	2	11	0
1	4	6	2011	1	53	EGV	2	6	1	1	1	1	1			Cat IV	2	2	2	8	NEGATIVE						3	Mummidivaram	40	3	15.0551	163				42	43	0.8	1.3	1	0	0	2	2009	GOVERNMENT	Cat I, Cat II	2	10	0
1	4	7	2011	0	22	EGV	2	6	1	1	1	1	1			Cat IV	1	1	2	8	NEGATIVE						9	Kunduru	50	4	20.8117	155				50	43	0.9	0.8	0.8	0	0	2	2010	GOVERNMENT	Cat I, Cat II	2	9	0
1	4	8	2011	0	25	GNT	2	6	1	1	1	1	1			Cat IV	2	2	9	8	NEGATIVE						9	Narasaraopet	42	3	17.4818	155				47	50	0.8	1	1	0	0	1	2010	GOVERNMENT	Cat I	2	5	0
1	4	9	2011	0	25	GNT	2	6	1	1	1	1	1			Cat IV	2	2	9	8	POSITIVE						1	Vinukonda	39	3	16.2331	155				45	47	1.2	1.1	1	0	5	2	2010	GOVERNMENT	Cat I, Cat II	2	6	0
1	4	10	2011	1	39	GNT	2	6	1	1	1	1	1			Cat IV	2	2	9	8	NEGATIVE						10	Ponnuru	66	5	23.9512	166				68	68	0.8	0.8	0.8	0	0	2	2009	GOVERNMENT	Pvt., Cat II	2	12	0
1	4	11	2011	1	36	KSN	4	9	3					1	1	Cat IV	2	2	2	8	NEGATIVE						1	Mahaveer	42	3	18.6667	150				44	47	1	1.2	0.9	0	0			GOVERNMENT		2		0
1	4	12	2011	0	32	GNT	2	6	1	1	1	1	1			Cat IV	2	2	1	8	NEGATIVE						3	Guntur	35	3	15.5556	150				37	39	1.8	0.9	1.2	0		2	2010	GOVERNMENT	Cat I, Cat II	2	12	0
1	4	13	2011	1	63	KSN	2	5	1	1	1	1	1			Cat IV	2	2	9	8	NEGATIVE						3	Vijayawada	47	4	17.6898	163				50	52	1.2	0.8	1	14	0	2	2009	GOVERNMENT	Cat I, Cat II	2	12	0
1	4	15	2011	1	24	EGV	4	9	1	1	1	2	2			Cat IV	2	2	2	8	NEGATIVE						9	Kathipudi	55	4	22.0317	158				55	56				0	0			GOVERNMENT		2		0
1	4	16	2011	1	55	GNT	2	5	1	1	1	1	1			Cat IV	1	1	9	8	NEGATIVE						10	Vinukonda	54	4	21.0938	160				58	59	0.8	1.2	1	73		2	2009	GOVERNMENT	Cat I, Cat II	2	12	0
1	4	17	2011	1	40	GNT	2	6	1	1	1	2	1			Cat IV	2	2	9	8	NEGATIVE						3	Vinukonda	67	5	24.6097	165				75	77	1.2	1	1.2	16	6	3	2006	GOVERNMENT	Cat I, Cat II, Cat II	1	22	1
1	4	18	2011	1	40	EGV	2	5	1	1	1	1	1			Cat IV	2	2	9	8	NEGATIVE						11	P. Gannavaram	47	4	22.3543	145				49	54	0.9	1	1.2	0	5	2	2010	GOVERNMENT	Cat I, Cat II	2	9	1
1	4	19	2011	1	44	EGV	2	6	1	1	1	2	1			Cat IV	2	2	9	8	NEGATIVE						9	Kathipudi	38	3	16.8889	150				44	43	0.8	1	1.4	0	0	2	2006	GOVERNMENT	Cat I, Cat II	2	9	1
1	4	20	2011	0	17	GNT	2	6	1	1	1	1	1			Cat IV	2	2	9	8	NEGATIVE						9	Ponnuru	32	2	13.67	153				33	34	0.9	0.9	1	0	6	2	2010	GOVERNMENT	Cat I, Cat II	2	8	0
1	4	21	2011	1	65	GNT	2	6	1	1	1	1	1			Cat IV	2	2	9	8	NEGATIVE						9	Tenali	54	4	19.8347	165				60	63	1.2	1.2	1	3	0	2	2010	GOVERNMENT	Cat I, Cat II	2	11	1
1	4	22	2011	0	33	WGV	2	6	1	1	1	1	2			Cat IV	2	2	9	8	NEGATIVE						1	V R Gudem	45	4	22.9592	140				46		0.9	0.8	1.1	0	0	1	2009	GOVERNMENT	Cat II	2	4	0
1	4	23	2011	0	22	KSN	2	6	1	1	1	1	2			Cat IV	2	2	9	8	NEGATIVE						1	Vijayawada	49	4	23.3056	145				54	55	0.8	0.8	1.2	5	2	2	2010	GOVERNMENT	Cat I, Cat II	2	14	0
1	4	24	2011	1	43	EGV	2	6	1	1	1	1	1			Cat IV	2	2	9	8	NEGATIVE						4	Kakinada	67	5	27.8876	155				67	69	0.8	1.1	1.1	0	0	2	2010	GOVERNMENT	Cat I, Cat II	2	9	1
1	4	25	2011	1	22	GNT	2	6	3					1	1	Cat IV	2	2	9	8	NEGATIVE						1	Sattenapalli	39	3	14.3251	165				45	48	0.8	0.9	0.9	0	0	2	2010	GOVERNMENT	Cat I, Cat II	2	10	0
1	4	26	2011	1	54	WGV	2	6	1	1	1	1	1			Cat IV	2	2	9	8	NEGATIVE						5	Lingapalem	53	4	25.2081	145				54	56	1.2	1.1	1	0	0	1	2009	GOVERNMENT	Cat II	2	9	1
1	4	27	2011	1	45	WGV	2	6	1	1	1	1	1			Cat IV	4	4	4	4	NEGATIVE						9	Eluru	65	5	27.7671	153						0.8			67		2	2009	GOVERNMENT	Cat I, Cat II	2	9	1
1	5	1	2008	1	40	nlg	2	6	1	1	1	1	1			Cat IV	2	2	2	4	NEGATIVE						9	nidamanoor	65	5	26.7094	156		NA	NA	74	72	0.8	1.2	1.2			2	2006	GOVERNMENT	cat 1,cat 2	2	14	1
1	5	2	2008	1	32	mdk	2	6	1	1	1	1	1			Cat IV	2	2	2	1	NEGATIVE						9	tekmal	41	3				NA	NA	39	41	0.7	0.9	1.1	0	6	1	2008	GOVERNMENT	cat 2	2	6	0
1	5	3	2008	1	29	rgr	2	6	1	1	1	2	1			Cat IV	4	4	4	4	NEGATIVE						9	vikarabad	66	5				NA	NA	67		0.9	0.9	0.9	37		2	2006	GOVERNMENT	cat 2 twice	1	16	0
1	5	4	2008	0	50	mdk	2	6	1	1	1	1	1			Cat IV	1	1	4	4	NEGATIVE						9	sangareddy	31	2				NA	NA	33		0.7	0.9		80		2	2007	GOVERNMENT	cat 1,cat 2	2	12	0
1	5	5	2008	1	30	nlg	2	6	1	1	1	1	1			Cat IV	2	2	2	1	POSITIVE						3	nidamanoor	43	3	15.7943	165		NA	NA	45	47	0.9	0.9	0.8	0	28	3	2005	OTHER	akt 4,cat 2,twice	1	20	0
1	5	6	2008	1	38	mdk	2	6	1	1	1	1	1			Cat IV	2	2	2	1	NEGATIVE						9	PODUCHAMPALLY	40	3				NA	NA	44	47	1	1.1	1	0	0	2	2006	GOVERNMENT	cat 2,twice	1	17	0
1	5	7	2008	1	50	mdk	2	6	1	1	1	1	1			Cat IV	3	3	3	3	NEGATIVE						9	siddipet	30	2				NA	NA			1					3	2007	GOVERNMENT	shrze,hrze,hre	1	21	0
1	5	8	2008	1	35	mdk	2	6	1	1	1	1	1			Cat IV	2	2	3	3	NEGATIVE						9	tekmal	30	2				NA	NA	37	38	1	1	1.3	0		1	2008	GOVERNMENT	hrzes,cat 2	2	6	0
1	5	9	2008	1	30	mdk	2	6	1	1	1	1	2			Cat IV	1	1	3	3	NEGATIVE		9/22/2009				9	narsingi	37	3	12.8028	170		NA	NA	36	32	0.8	1.2	0.8	0		2	2007	GOVERNMENT	cat 2,twice	1	16	0
1	5	10	2008	1	42	nlg	2	6	1	1	1	1	1			Cat IV	2	1	3	3	NEGATIVE		9/22/2009				9	nidamanoor	42	3	14.881	168		NA	NA	42	42	1	0.8	1	0		2	2004	GOVERNMENT	cat 1,cat 2	2	15	0
1	5	11	2008	1	50	mdk	2	6	1	1	1	1	2			Cat IV	2	2	2	1	NEGATIVE						6	sangareddy	45	4				NA	NA	50	45	1.1	0.9	1.2	4	18	2	2007	GOVERNMENT	cat 1,cat 2	2	8	0
1	5	12	2008	1	61	rgr	2	6	1	1	1	1	1			Cat IV	2	1	2	1	NEGATIVE		11/16/2011				9	tandur	34	2				NA	NA	36	38	1	1.2	1	12	17	3	2007	GOVERNMENT	cat 1,cat 2	2	21	0
1	5	13	2008	1	65	rgr	2	6	1	1	1	1	1			Cat IV	1	4	4	4	NEGATIVE						9	shivananda	46	4				NA	NA	41	41	0.8	1.2		4		2	2006	OTHER	cat 1,cat 2	2	9	0
1	5	14	2008	0	30	nlg	2	6	1	1	1	1	1			Cat IV	2	1	2	1	NEGATIVE		9/22/2009				1	yadagirigutta	49	4	20.6612	154		NA	NA	46	52	0.9	0.7	1	0	8	2	2006	GOVERNMENT	hrzes,cat 2	2	13	0
1	5	15	2008	0	30	nlg	2	6	1	1	1	1	1			Cat IV	3	3	3	3	NEGATIVE						9	CHITYAL	28	2				NA	NA	50	51	1.1	0.8				3	2005	GOVERNMENT	cat 1,cat 2,cat 3	2	20	0
1	5	16	2008	1	20	nlg	2	6	1	1	1	1	2			Cat IV	2	2	2	1	NEGATIVE						9	chinthapally	38	3				NA	NA	31	40	0.8	1	1	0	0	2	2006	GOVERNMENT	cat 1,cat 2	2	16	1
1	5	17	2008	1	52	mdk	2	6	1	1	1	2	1			Cat IV	1	1	1	3	NEGATIVE		9/22/2009				9	siddipet	42	3				NA	NA	48	48	0.9	0.9	1.1	0		3	2004	GOVERNMENT	akt 4,cat 2,cat3	2	18	1
1	5	18	2008	0	27	hyd	2	6	1	1	1	1	1			Cat IV	2	2	2	1	NEGATIVE						9	nampally	43	3				NA	NA	38	50	1	0.8	0.8	4	29	2	2008	OTHER	cat 2,twice	1	6	0
1	5	19	2008	0	15	mdk	2	6	1	1	1	2	1			Cat IV	2	2	3	3	NEGATIVE		5/26/2010				4	sangareddy	29	2				NA	NA	31	29	1	0.9	1.1	0		2	2004	GOVERNMENT	shrze,hrze,hre	1	11	0
1	5	20	2008	1	21	hyd	2	6	1	1	1	1	1			Cat IV	2	1	4	4	POSITIVE		9/22/2009				9	dhoodhbowli	45	4				NA	NA	48		0.9	0.9	0.9	97		2	2007	GOVERNMENT	cat 2	2	14	0
1	5	21	2008	1	21	nlg	2	6	1	1	1	2	1			Cat IV	1	1	3	3	NEGATIVE						9	chivemla	37	3	14.2741	161		NA	NA	38	38	1	0.8	1.4	7		8	2003	OTHER	cat 2	2	47	0
1	5	22	2008	1	64	nlg	2	6	1	1	1	2	1			Cat IV	1	2	2	4	NEGATIVE						2	valigonda	82	5				NA	NA	80	80	1	0.9	1.2	0	84	2	2006	GOVERNMENT	cat 1,cat 2	2	11	1
1	5	23	2008	1	35	mdk	2	6	1	1	1	2	1			Cat IV	2	2	2	1	NEGATIVE						9	mirzapur	50	4				NA	NA	48	48	1.1	1	1.3	0	0	2	2006	GOVERNMENT	cat 2,nd 1	2	17	0
1	5	24	2008	1	45	mdk	2	6	1	1	1	1	2			Cat IV	2	2	2	1	NEGATIVE						9	gajwel	44	3	17.1875	160		NA	NA	45	42	1.1	1.3	1.6	0	4	3	2006	GOVERNMENT	cat1,cat 2,twice	1	19	0
1	5	25	2008	0	30	rgr	2	6	1	1	1	2	1			Cat IV	2	2	2	1	NEGATIVE						10	shivananda	38	3				NA	NA	39	40	1	1.1	1	24	97	2	2006	OTHER	akt 4,cat 2	2	8	0
1	5	1	2009	1	50	hyd	2	6	1	1	1	1	1			Cat IV	2	1	2	4	NEGATIVE		9/22/2009				9	dabeerpura	54	4				NA	NA	62	62	1	0.9	1.1	18	106	3	2005	GOVERNMENT	cat 1,cat 2	2	14	1
1	5	2	2009	1	25	rgr	2	6	1	1	1	1	2			Cat IV	1	1	2	6	NEGATIVE		11/19/2009				9	uppal	48	4				NA	NA	55	53	1	1	1.1	2	0	2	2006	GOVERNMENT	cat 2	2	11	0
1	5	3	2009	1	33	nlg	2	6	1	1	1	1	1			Cat IV	2	2	2	1	POSITIVE						9	chintapally	60	4				NA	NA	65	66	1	1.2	1.2	0	0	2	2005	OTHER	akt4,cat 1,cat 2	2	11	0
1	5	4	2009	0	45	rgr	2	6	1	1	1	2	2			Cat IV	4	4	4	4	NEGATIVE						9	shivananda	65	5				NA	NA			0.9					1	2008	GOVERNMENT	cat 2	2	5	0
1	5	5	2009	1	60	rgr	2	6	1	1	1	1	1			Cat IV	1	1	3	3	NEGATIVE		11/19/2009				9	vikarabad	39	3				NA	NA	39	39	0.9	1	1.1			2	2008	GOVERNMENT	cat 1,cat 2	2	14	0
1	5	6	2009	1	25	mdk	2	6	1	1	1	1	1			Cat IV	2	2	2	1	NEGATIVE						9	mirzapur	42	3				NA	NA	44	46	0.7	1.2	1.1	0	0	2	2007	GOVERNMENT	cat 2,twice	1	14	0
1	5	7	2009	1	21	rgr	2	6	1	1	1	2	1			Cat IV	2	2	2	1	NEGATIVE						9	vikarabad	45	4	16.5289	165		NA	NA	46	54	0.9	1	0.9	72	0	1	2008	GOVERNMENT	cat 1,cat 2	2	6	0
1	5	8	2009	0	30	rgr	2	6	1	1	1	1	1			Cat IV	9	9	9	4	NEGATIVE						9	medchal	32	2				NA	NA	33		0.9	1	0.9	102		2	2004	GOVERNMENT	cat 1,cat 2	2	10	0
1	5	9	2009	1	36	rgr	2	6	1	1	1	2	2			Cat IV	1	1	1	6	NEGATIVE		2010-04-12				9	tandur	53	4				NA	NA	54	54	1	0.9	0.9	42	6	2	2007	GOVERNMENT	cat 1,cat 2	2	16	0
1	5	10	2009	0	28	hyd	2	6	1	1	1	1	1			Cat IV	9	9	9	4	NEGATIVE						9	musheerabad	50	4				NA	NA			0.9					2	2007	OTHER	akt4,cat 2	2	10	0
1	5	11	2009	0	20	nlg	2	6	1	1	1	1	1			Cat IV	1	2	1	3	NEGATIVE		5/26/2010				9	nalganda	33	2				NA	NA	33	33	0.9	1	1.1	0		2	2006	OTHER	cat 1,pvt,cat 2	2	14	0
1	5	12	2009	0	22	mdk	2	6	1	1	1	2	2			Cat IV	2	2	1	6	NEGATIVE		5/26/2010				9	tekmal	34	2				NA	NA	38	37	0.8	0.8	0.7	1	0	2	2007	GOVERNMENT	cat 2,twice	1	12	0
1	5	13	2009	1	37	rgr	2	6	1	1	1	1	1			Cat IV	1	1	9	3	NEGATIVE		2010-04-12				4	shivananda	49	4	16	175		NA	NA	47	45	1.1	0.9	0.9	21		3	2007	GOVERNMENT	cat1,cat2,twice	1	22	0
1	5	14	2009	0	24	mdk	2	6	1	1	1	1	1			Cat IV	2	2	2	1	NEGATIVE						2	sangareddy	32	2				NA	NA	32	34	0.9	0.8	1.2	0	46	3	2007	GOVERNMENT	cat1,cat2,twice	1	18	0
1	5	15	2009	0	22	mdk	2	6	1	1	1	1	1			Cat IV	2	2	2	1	NEGATIVE						9	sangareddy	64	4				NA	NA	61	61	1.1	1.2	1.3	0	50	2	2008	GOVERNMENT	cat 1,cat 2	2	10	0
1	5	16	2009	1	35	mdk	2	6	1	1	1	1	1			Cat IV	9	9	9	4	NEGATIVE						9	mirzapur	39	3				NA	NA			0.7			0	0	2	2008	GOVERNMENT	cat 1,cat 2	2	9	0
1	5	17	2009	1	25	mdk	2	6	1	1	1	1	1			Cat IV	2	2	4	4	NEGATIVE						9	mirzapur	43	3				NA	NA			0.8	1.2		110		3	2007	GOVERNMENT	cat1,cat2,twice	1	17	0
1	5	18	2009	1	30	hyd	2	6	1	1	1	1	2			Cat IV	1	1	2	6	NEGATIVE		11/19/2009				9	musheerabad	41	3	14.5266	168		NA	NA	42	42	0.8	0.9	0.9	48	95	2	2007	GOVERNMENT	cat 1,cat 2	2	10	0
1	5	19	2009	1	36	hyd	2	6	1	1	1	2	2			Cat IV	2	1	2	1	NEGATIVE		11/19/2009				9	dhoodhbowli	41	3				NA	NA	44	45	1	1.1	1	0	93	2	2007	GOVERNMENT	cat 1,cat 2	2	14	0
1	5	20	2009	1	50	rgr	2	6	1	1	1	2	1			Cat IV	1	1	3	3	NEGATIVE		11/19/2009				9	vikarabad	39	3				NA	NA			0.7	0.8		41		2	2007	GOVERNMENT	cat 1,cat 2	2	14	0
1	5	21	2009	1	35	mdk	2	6	1	1	1	1	1			Cat IV	2	1	1	4	NEGATIVE		11/16/2011				9	narsingi	56	4				NA	NA	56	56	1	1	1.1	0	100	3	2006	GOVERNMENT	cat 1,cat 2	2	24	0
1	5	22	2009	0	20	rgr	2	6	1	1	1	1	1			Cat IV	2	2	2	1	NEGATIVE						9	uppal	46	4	17.9688	160		NA	NA	52	52	0.8	1.2	0.9	0	0	2	2005	GOVERNMENT	cat 2,twice	1	16	0
1	5	23	2009	0	16	rgr	2	6	1	1	1	1	2			Cat IV	2	2	2	1	NEGATIVE						9	uppal	39	3				NA	NA	46	49	0.7	0.8	0.7	0	0	3	2008	GOVERNMENT	cat1,cat2,twice	1	19	0
1	5	24	2009	1	32	mdk	2	6	1	1	1	1	1			Cat IV	2	2	2	6	NEGATIVE		5/26/2010				9	sangareddy	45	4				NA	NA	48	46	0.9	1.2	1	0	0	4	2008	OTHER	akt4,cat 2	2	26	0
1	5	25	2009	0	25	nlg	1	6	1	1	1	2	1			Cat IV	1	1	1	6	NEGATIVE						9	nalganda	34	2				NA	NA	33	36	0.7	1	1	68	38	1	2006	GOVERNMENT	cat 1,cat 2	2	5	0
1	5	26	2009	1	50	mdk	2	6	1	1	1	1	2			Cat IV	9	9	9	4	NEGATIVE						9	narsingi	35	3				NA	NA			1					2	2008	GOVERNMENT	cat1,cat2,twice	1	8	0
1	5	27	2009	0	35	mdk	1	6	1	1	1	1	1			Cat IV	2	2	2	1	NEGATIVE						9	narsingi	34	2				NA	NA	35	35	0.8	1.2	1.1	0	1	3	2008	GOVERNMENT	cat 1,cat 2	2	22	0
1	5	28	2009	0	25	mdk	2	6	1	1	1	2	2			Cat IV	2	2	2	1	POSITIVE						9	narsingi	45	4				NA	NA	45	46	1.4	0.7	1.1	24	83	2	2005	GOVERNMENT	cat 1,cat 2	2	8	0
1	5	29	2009	1	40	nlg	2	6	1	1	1	1	2			Cat IV	2	2	2	1	NEGATIVE						4	chilkur	48	4	14.8148	180		NA	NA	49	48	1	1.2	1.4	0	0	2	2008	OTHER	cat1,cat2,twice	1	7	0
1	5	30	2009	1	25	nlg	1	6	1	1	1	2	2			Cat IV	2	2	2	4	NEGATIVE						2	nalganda	40	3				NA	NA			1			88		3	2006	OTHER	cat1,cat2,twice	1	16	0
1	5	31	2009	0	25	nlg	1	6	1	1	1	2	2			Cat IV	2	2	2	1	NEGATIVE						9	nidamanoor	44	3				NA	NA	44	44	0.8	1.2	0.9	0	0	2	2006	OTHER	akt4,cat 2	2	7	0
1	5	32	2009	1	30	nlg	2	6	1	1	1	2	2			Cat IV	2	2	2	1	NEGATIVE						1	chilkur	46	4				NA	NA	46	47	0.9	1.2	1.2	0	0	3	2006	OTHER	akt4,cat 2	2	11	0
1	5	33	2009	1	65	nlg	2	6	1	1	1	2	2			Cat IV	2	2	4	4	NEGATIVE						5	valigonda	76	5	26.2976	170		NA	NA	75	75	1.2	1.1	1	2	105	2	2008	GOVERNMENT	cat 1,cat 2	2	8	1
1	5	34	2009	1	22	hyd	2	6	1	1	1	1	1			Cat IV	2	2	2	1	NEGATIVE						9	dhoodhbowli	50	4				NA	NA	52	57	1	0.9	0.8	0	0	2	2007	GOVERNMENT	cat 2	2	10	0
1	5	35	2009	1	28	hyd	2	6	1	1	1	1	1			Cat IV	1	1	3	3	NEGATIVE		5/26/2010				9	dhoodhbowli	40	3	15.625	160		NA	NA	44	42	0.7	1.1	1.1	0		2	2002	GOVERNMENT	cat1,cat2,twice	1	9	0
1	5	36	2009	0	42	hyd	2	6	1	1	1	2	2			Cat IV	2	2	2	1	NEGATIVE						9	nampally	65	5				NA	NA	70	71	0.9	0.6	0.9	0	2	4	2005	GOVERNMENT	cat 1,cat 2	2	27	0
1	5	37	2009	0	25	rgr	2	6	1	1	1	1	2			Cat IV	3	3	3	3	NEGATIVE						9	dabeerpura	32	2				NA	NA								2	2008	GOVERNMENT	cat 1,cat 2	2	14	1
1	5	38	2009	1	70	hyd	2	6	1	1	1	1	1			Cat IV	2	2	2	1	NEGATIVE						9	dabeerpura	43	3				NA	NA	44	45	1	1.8	1.6	2	28	2	2008	OTHER	akt4,cat 2	2	9	0
1	5	39	2009	1	35	rgr	2	6	1	1	1	2	1			Cat IV	2	2	3	3	NEGATIVE						9	dabeerpura	55	4				NA	NA	55		1	0.9	0.9	0		2	2004	GOVERNMENT	cat 1,cat 2	2	10	1
1	5	40	2009	0	20	hyd	2	6	1	1	1	1	2			Cat IV	2	2	2	1	NEGATIVE						9	nampally	40	3				NA	NA		40	0.8	0.7	0.9	0	0	2	2007	OTHER	cat 1,cat 2	2	14	0
1	5	41	2009	0	16	rgr	2	6	1	1	1	1	2			Cat IV	2	2	2	1	NEGATIVE						9	dabeerpura	35	3				NA	NA	41	45	0.8	0.9	0.9	3	31	3	2007	GOVERNMENT	cat 1,cat 2	2	19	0
1	5	42	2009	0	20	nlg	2	6	1	1	1	2	2			Cat IV	2	2	2	1	NEGATIVE						1	chilkur	27	2				NA	NA	26	28	1	0.9	0.7	0	0	3	2004	OTHER	akt4,cat 2	2	22	0
1	5	43	2009	1	24	rgr	2	6	1	1	1	2	2			Cat IV	4	4	4	4	NEGATIVE						9	uppal	47	4				NA	NA			0.9					2	2008	GOVERNMENT	cat1,cat2,twice	1	10	0
1	5	44	2009	1	26	mdk	2	6	1	1	1	1	2			Cat IV	2	2	4	4	NEGATIVE						4	narsingi	47	4				NA	NA	47	47	1	1	1.3	5		3	2008	GOVERNMENT	cat 1,cat 2	2	22	0
1	5	45	2009	1	45	mdk	2	6	1	1	1	2	2			Cat IV	2	3	3	3	NEGATIVE						9	sangareddy	40	3	16.8663	154		NA	NA			0.8					4	2006	GOVERNMENT	cat1,cat2,twice	1	9	0
1	5	46	2009	0	16	rgr	2	6	1	1	1	1	1			Cat IV	2	2	2	1	NEGATIVE						9	ibrahimpatnam	30	2				NA	NA	30	31	1.3	0.9	0.9	0	0	2	2008	OTHER	akt4,cat 2	2	11	0
1	5	47	2009	1	25	rgr	2	6	1	1	1	1	1			Cat IV	2	2	2	1	NEGATIVE						10	vikarabad	36	3				NA	NA	38	39	0.9	1	1	1	13	2	2006	OTHER	akt4,cat 2	2	11	0
1	5	48	2009	0	19	rgr	2	6	1	1	1	2	2			Cat IV	1	1	2	3	NEGATIVE		2010-04-12				9	vikarabad	42	3				NA	NA	45	46	0.5	1.4	1.5	0		3	2006	OTHER	cat1,cat2,twice	1	22	0
1	5	49	2009	1	28	rgr	2	6	1	1	1	2	1			Cat IV	2	1	2	1	NEGATIVE		5/26/2010				9	tandur	39	3				NA	NA	42	42	0.9	0.9	0.8	0	60	2	2008	OTHER	akt4,cat 2	2	15	0
1	5	50	2009	0	17	rgr	2	6	1	1	1	2	2			Cat IV	2	2	2	1	NEGATIVE						9	shivananda	48	4				NA	NA	57	66	0.7	1.1	1.2	0	0	3	2006	GOVERNMENT	cat1,cat2,twice	1	25	0
1	5	51	2009	0	48	nlg	2	6	1	1	1	1	1			Cat IV	2	2	4	4	NEGATIVE						9	chintapally	27	2				NA	NA	29		0.9	0.9	1	0		2	2008	GOVERNMENT	cat 1,cat 2	2	8	0
1	5	52	2009	1	50	nlg	2	6	1	1	1	1	2			Cat IV	2	2	2	1	NEGATIVE						9	chivemla	46	4				NA	NA	46	47	1.4	0.9	1	1	70	3	2006	GOVERNMENT	cat 1,cat 2,twice	1	15	0
1	5	53	2009	1	19	rgr	2	6	1	1	1	1	1			Cat IV	2	2	2	1	NEGATIVE						9	ibrahimpatnam	52	4				NA	NA	58	64	0.9	1	0.9	0	7	4	2008	OTHER	cat 1 pvt,cat 2,twice	1	18	0
1	5	54	2009	1	45	mdk	2	6	1	1	1	1	1			Cat IV	2	2	2	1	NEGATIVE						4	medak	45	4				NA	NA	45	45	0.8	0.8	0.8	4	42	2	2007	GOVERNMENT	cat 1,cat 2	2	20	0
1	5	55	2009	0	45	hyd	2	6	1	1	1	1	1			Cat IV	2	2	2	1	NEGATIVE						5	mahavir	34	2				NA	NA	37	34	1			1	2	3	2000	GOVERNMENT	cat 1,cat 2	2	16	0
1	5	56	2009	1	55	hyd	2	6	1	1	1	2	1			Cat IV	2	2	2	1	NEGATIVE						5	dtc	47	4				NA	NA	50	55	1.1	1	1	0	0	2	2007	GOVERNMENT	cat 1,cat 2	2	14	0
1	5	57	2009	1	40	mdk	2	6	1	1	1	1	1			Cat IV	2	1	1	4	NEGATIVE						9	siddipet	39	3				NA	NA	41	40	1.1	0.9	0.9	7	73	1	2008	GOVERNMENT	hrze	2	8	0
1	5	58	2009	0	30	hyd	2	6	1	1	1	1	1			Cat IV	2	2	2	1	NEGATIVE						5	gandhi	30	2				NA	NA	39	45	0.8	0.7	0.6	6	0	2	2007	GOVERNMENT	cat 1,cat 2	2	10	0
1	5	59	2009	1	15	mdk	2	6	1	1	1	2	1			Cat IV	2	2	2	1	NEGATIVE		7/16/2010				9	siddipet	22	1				NA	NA	23	24	0.7	0.7	0.9	12	7	2	2008	OTHER	hrz,hrze,govt	2	8	0
1	5	60	2009	1	40	rgr	2	6	1	1	1	2	2			Cat IV	2	2	2	1	NEGATIVE		2/28/2011				9	shivananda	42	3	17.0392	157		NA	NA	43	33	0.8	1	1	128	7	2	2007	GOVERNMENT	cat1cat2	2	18	0
1	5	61	2009	1	36	mdk	2	6	1	1	1	2	1			Cat IV	1	1	1	3	NEGATIVE						9	siddipet	36	3				NA	NA	38	34	0.9	1.2	1.2	28	26	2	2008	GOVERNMENT	shrze,twice	1	14	0
1	5	62	2009	1	37	nlg	2	6	1	1	1	1	1			Cat IV	2	2	2	1	NEGATIVE						6	yadagirigutta	34	2				NA	NA	34	35	0.8	1.2	1.1	19	89	2	2001	GOVERNMENT	hrzes,twise	1	9	0
1	5	63	2009	1	35	rgr	2	6	1	1	1	2	2			Cat IV	2	1	4	4	NEGATIVE						9	ibrahimpatnam	50	4				NA	NA	55		1	1.1	0.9	5		3	2008	OTHER	akt 4,cat 2,twice	1	15	0
1	5	64	2009	1	40	rgr	2	6	1	1	1	2	2			Cat IV	2	9	1	6	NEGATIVE		5/18/2011				1	shivananda	42	3				NA	NA	44	40	0.9	1.5	1.9	40	101	1	2008	GOVERNMENT	cat 1	2	5	0
1	5	65	2009	0	38	rgr	2	6	1	1	1	2	1			Cat IV	2	2	2	4	NEGATIVE						9	shivananda	63	4				NA	NA	58	60	0.9	1.7	1.4	10	124	1	2008	GOVERNMENT	cat1	2	6	0
1	5	66	2009	0	45	hyd	2	6	1	1	1	2	1			Cat IV	2	2	2	3	NEGATIVE						9	dhoodhbowli	34	2				NA	NA	36	37	0.9	0.9	0.9	12		2	2008	GOVERNMENT	cat 1,cat 2	2	10	0
1	5	67	2009	1	33	nlg	2	6	1	1	1	1	2			Cat IV	1	2	3	3	NEGATIVE						6	yadagirigutta	35	3				NA	NA	37		0.9	0.8	1.2	6		1	2007	GOVERNMENT	cat 2	2	8	0
1	5	68	2009	1	41	rgr	2	6	1	1	1	2	2			Cat IV	2	2	2	4	NEGATIVE						5	shivananda	70	5				NA	NA	70	69	1	1	1.6	0	108	1	2008	GOVERNMENT	cat1	2	5	0
1	5	69	2009	0	24	rgr	2	6	1	1	1	2	1			Cat IV	2	2	4	4	NEGATIVE		7/16/2010				10	uppal	30	2				NA	NA	31	31	0.7	0.8	0.7	12		1	2009	GOVERNMENT	cat 1	2	5	0
1	5	70	2009	1	50	nlg	2	6	1	1	1	1	1			Cat IV	2	2	1	6	NEGATIVE						9	chivemla	35	3				NA	NA	35	36	0.8	0.8	0.9	0	0	3	2008	OTHER	cat 2,cat 3	2	11	0
1	5	71	2009	1	30	rgr	2	6	1	1	1	2	2			Cat IV	4	4	4	4	NEGATIVE						9	ibrahimpatnam	70	5				NA	NA			0.8					2	2009	OTHER	cat 1,cat 2	2	10	0
1	5	72	2009	1	26	hyd	2	6	1	1	1	1	1			Cat IV	1	2	3	3	NEGATIVE						9	dhoodhbowli	35	3	12.2545	169	10/21/2009	KANAMYCINTOXICITY	2009-11-10	41		0.9	0.9	0.9	0		3	2007	OTHER	cat 1,cat 2	2	10	0
1	5	73	2009	1	50	rgr	2	6	1	1	1	2	1			Cat IV	4	4	4	4	NEGATIVE						9	shivananda	51	4				NA	NA			0.7					1	2008	GOVERNMENT	cat 1	2	4	0
1	5	74	2009	1	50	nlg	2	6	1	1	1	2	1			Cat IV	3	3	3	3	NEGATIVE						9	nalganda	40	3				NA	NA			1.4					2	2008	OTHER	hrze,cat 2	2	10	1
1	5	75	2009	1	45	mdk	2	6	1	1	1	2	1			Cat IV	3	3	3	3	NEGATIVE						9	narsingi	40	3	16.4366	156		NA	NA	44		0.7	1.3	1			3	2007	GOVERNMENT	cat 1,cat2,twice	1	17	0
1	5	76	2009	1	30	rgr	2	6	1	1	1	2	2			Cat IV	2	2	2	1	NEGATIVE						9	uppal	34	2	12.0465	168		NA	NA	52	47	0.9	1.3	0.8	11	0	2	2007	GOVERNMENT	cat 1,cat 2	2	11	0
1	5	77	2009	1	56	hyd	2	6	1	1	1	1	1			Cat IV	2	2	2	3	NEGATIVE						9	dabeerpura	44	3	18.3143	155		NA	NA	44	45	0.9	1.4	1.3	0	14	3	2008	GOVERNMENT	cat1,cat2,twice	1	15	0
1	5	78	2009	1	27	hyd	2	6	1	1	1	2	1			Cat IV	1	1	3	3	NEGATIVE		7/16/2010				9	gandhi	50	4				NA	NA	52		0.9	0.8	0.9	47		2	2008	OTHER	akt4,cat 2	2	7	0
1	5	79	2009	1	23	rgr	2	6	1	1	1	2	2			Cat IV	2	2	2	1	NEGATIVE						9	dabeerpura	55	4				NA	NA	56	58	1.1	1	1.2	0	0	2	2006	GOVERNMENT	cat 1,cat 2	2	10	0
1	5	80	2009	0	19	hyd	2	6	1	1	1	2	2			Cat IV	2	2	2	1	NEGATIVE						9	nampally	40	3				NA	NA	47	33	0.8	0.7	0.7	0	0	3	2008	OTHER	pvt,hrzes	2	10	0
1	5	81	2009	1	26	mdk	2	6	1	1	1	2	2			Cat IV	1	1	2	4	NEGATIVE						9	sangareddy	41	3	15.4315	163		NA	NA	41	41	0.8	0.8	0.9	0	65	2	2008	GOVERNMENT	cat 1,cat 2	2	10	0
1	5	82	2009	0	45	mdk	2	6	1	1	1	2	2			Cat IV	4	4	4	9	NEGATIVE						6	mirzapur	43	3				NA	NA			0.8			99		3	2005	OTHER	cat 1,akt 4,cat 2	2	18	0
1	5	83	2009	1	37	mdk	2	6	1	1	1	1	1			Cat IV	3	3	3	3	NEGATIVE						9	medak	45	4				NA	NA			1					4	2004	GOVERNMENT	cat 1,cat 2,twice	1	22	0
1	5	84	2009	1	22	nlg	2	6	1	1	1	1	1			Cat IV	2	2	2	1	NEGATIVE						9	nidamanoor	54	4				NA	NA	56	60	1.3	1.2	0.9	0	0	4	2004	GOVERNMENT	cat 1,cat 2,twice	1	20	0
1	5	85	2009	0	19	nlg	2	6	1	1	1	1	1			Cat IV	2	2	2	1	NEGATIVE						9	nidamanoor	33	2				NA	NA	34	46	0.7	1	1.2	0	31	2	2008	OTHER	akt 4,cat 2	2	10	0
1	5	86	2009	1	40	rgr	2	6	1	1	1	2	2			Cat IV	2	2	2	1	NEGATIVE						9	tandur	52	4				NA	NA	54	56	0.9	0.9	1	16	10	2	2009	GOVERNMENT	cat1,cat2	2	18	0
1	5	87	2009	1	25	hyd	2	6	1	1	1	2	1			Cat IV	3	3	3	3	NEGATIVE						9	musheerabad	34	2				NA	NA			0.8					1	2009	GOVERNMENT	cat 1	2	5	0
1	5	88	2009	1	42	nlg	2	6	1	1	1	1	2			Cat IV	2	2	2	1	NEGATIVE						2	yadagirigutta	55	4	20.4491	164		NA	NA	55	58	1.2	1.2	1	0	0	1	2008	GOVERNMENT	cat 2	2	8	0
1	5	89	2009	1	53	nlg	2	6	1	1	1	2	2			Cat IV	2	2	2	1	NEGATIVE						4	yadagirigutta	58	4				NA	NA	58	51	0.9	0.9		14	49	2	2007	GOVERNMENT	hrze,hrzes	2	14	1
1	5	90	2009	1	50	rgr	2	6	1	1	1	2	2			Cat IV	3	3	3	3	NEGATIVE						9	uppal	54	4	23.3726	152		NA	NA			1.2					1	2009	GOVERNMENT	cat 1	2	5	0
1	5	91	2009	1	35	mdk	2	6	1	1	1	2	2			Cat IV	1	1	2	4	POSITIVE		7/16/2010				9	narsingi	56	4	23.3091	155		NA	NA	56	54	1	1.2	1.1	43	94	1	2008	GOVERNMENT	cat 2	2	8	0
1	5	92	2009	1	53	rgr	2	6	1	1	1	1	1			Cat IV	4	4	4	4	NEGATIVE						9	shivananda	79	5				NA	NA			1	1.3		69		3	1984	OTHER	hrzes(pvt),cat 2 twice	1	19	0
1	5	93	2009	1	18	rgr	2	6	1	1	1	1	1			Cat IV	3	3	3	3	NEGATIVE						9	tandur	49	4				NA	NA			1			62		2	2008	OTHER	akt 3,cat 1	2	3	0
1	5	94	2009	1	48	rgr	2	6	1	1	1	2	2			Cat IV	9	9	9	3	NEGATIVE						9	tandur	38	3				NA	NA			1					2	2008	GOVERNMENT	cat 1,cat 2	2	13	0
1	5	95	2009	1	35	rgr	2	6	1	1	1	1	2			Cat IV	2	2	2	1	NEGATIVE						2	tandur	42	3				NA	NA	42	42	1	1	1	29	7	2	2009	GOVERNMENT	cat 1,cat 2	2	9	0
1	5	96	2009	1	38	nlg	2	6	1	1	1	1	2			Cat IV	2	2	2	1	NEGATIVE						9	chivemla	40	3				NA	NA	41	42	1	0.9	1	0	1	4	2006	OTHER	akt 4,cat 2,twice	1	24	0
1	5	97	2009	1	35	mdk	2	6	1	1	1	1	1			Cat IV	2	1	2	3	NEGATIVE		2/28/2011				9	sangareddy	52	4				NA	NA	50	50	0.8	1.3	1.1	0	1	3	2008	GOVERNMENT	cat1,cat2,twice	1	18	0
1	5	98	2009	1	25	mdk	2	6	1	1	1	1	1			Cat IV	2	2	3	3	NEGATIVE						9	sangareddy	80	5				NA	NA	78		0.9	1.2	1.3			3	2007	OTHER	akt 4,cat 1,cat 2	2	25	0
1	5	99	2009	0	37	nlg	2	6	1	1	1	1	1			Cat IV	2	2	2	4	NEGATIVE						4	yadagirigutta	35	3				NA	NA	39	40	0.6	1	1	9	62	1	2008	GOVERNMENT	cat 2	2	8	0
1	5	100	2009	1	38	nlg	1	6	1	1	1	1	1			Cat IV	1	2	2	1	NEGATIVE						9	nidamanoor	55	4			3/26/2010	KANAMYCINTOXICITY	NA	58	62	1.2	1.7	1	0	7	2	2009	GOVERNMENT	cat 1,cat 2	2	7	0
1	5	1	2010	0	19	hyd	1	6	1	1	1	2	1			Cat IV	2	2	2	1	NEGATIVE						9	gandhi	45	4				NA	NA	48	54	0.6	0.8	0.8	0	1	1	2009	GOVERNMENT	cat1	2	5	0
1	5	2	2010	1	50	nlg	2	6	1	1	1	1	1			Cat IV	2	2	2	1	NEGATIVE						6	chilkur	40	3				NA	NA	40	42	0.8	1.3	1	0	0	3	2008	GOVERNMENT	cat1,cat2, akt-4	2	15	0
1	5	3	2010	1	21	rgr	2	6	1	1	1	1	1			Cat IV	3	3	3	3	NEGATIVE						9	uppal	45	4				NA	NA			0.7					1	2009	GOVERNMENT	cat2	2	11	0
1	5	4	2010	1	35	hyd	2	6	1	1	1	2	1			Cat IV	4	4	4	4	NEGATIVE						5	nampally	41	3			3/16/2010	KANAMYCINTOXICITY	NA	40		1.2	1.2		65		3	2007	GOVERNMENT	cat1,cat2	2	22	0
1	5	5	2010	1	55	mdk	2	6	1	1	1	1	2			Cat IV	4	4	4	4	NEGATIVE						9	siddipet	55	4				NA	NA			1.2			119		3	2006	GOVERNMENT	cat1,cat2	2	20	0
1	5	6	2010	1	30	hyd	2	6	1	1	1	2	1			Cat IV	2	2	2	3	NEGATIVE						10	mahavir	61	4				NA	NA	61	64	1.1	1.2	1	0		2	2009	GOVERNMENT	cat1,cat2	2	9	0
1	5	7	2010	1	60	hyd	2	6	1	1	1	1	1			Cat IV	3	3	3	3	NEGATIVE						5	nampally	37	3				NA	NA			0.7					2	2008	GOVERNMENT	cat1,cat2	2	12	0
1	5	8	2010	1	41	nlg	1	6	1	1	1	1	1			Cat IV	1	1	1	8	NEGATIVE		5/18/2012				1	valigonda	32	2				NA	NA	32	35	0.7	1.1	1.1	0	0	2	2009	GOVERNMENT	cat1,cat2	2	20	0
1	5	9	2010	0	18	hyd	2	6	1	1	1	1	1			Cat IV	2	2	2	2	NEGATIVE						5	mahavir	47	4				NA	NA	41	41	1.2	0.8	1.2	6	0	1	2009	GOVERNMENT	cat1	2	5	0
1	5	10	2010	1	48	hyd	2	6	1	1	1	1	2			Cat IV	2	2	2	1	NEGATIVE						9	musheerabad	42	3				NA	NA	43	44	0.9	0.9	0.9	8	0	2	2007	GOVERNMENT	cat1,cat2	2	16	0
1	5	11	2010	1	29	hyd	2	6	1	1	1	1	1			Cat IV	2	2	2	8	NEGATIVE						5	nampally	34	2				NA	NA	34	34	1	1	0.8	0	0	3	2009	GOVERNMENT	cat1,cat2twice	1	8	0
1	5	12	2010	1	20	rgr	2	6	1	1	1	1	1			Cat IV	4	4	4	4	NEGATIVE						5	ibrahimpatnam	28	2				NA	NA	25		0.8	0.8	0.8	10		2	2007	GOVERNMENT	cat1,cat2	2	20	0
1	5	13	2010	0	24	rgr	2	6	1	1	1	2	2			Cat IV	4	4	4	4	NEGATIVE						5	uppal	28	2				NA	NA			0.7					1	2008	GOVERNMENT	cat1	2	3	0
1	5	14	2010	0	25	nlg	2	6	1	1	1	2	2			Cat IV	2	2	2	1	NEGATIVE						9	valigonda	41	3				NA	NA	47	50	0.8	0.6	0.7	0	0	2	2009	GOVERNMENT	cat1,cat2	2	9	0
1	5	15	2010	1	26	mdk	2	6	1	1	1	1	1			Cat IV	2	2	2	8	NEGATIVE						9	sangareddy	31	2			5/25/2011	Psychiatric Problem		40	46	0.9	1	1.1	0	0	4	2006	GOVERNMENT	cat1,cat2thrice	1	27	0
1	5	16	2010	1	36	mdk	2	6	1	1	1	2	1			Cat IV	2	2	3	3	NEGATIVE						9	sangareddy	58	4				NA	NA	60		1	1	0.9			3	2009	GOVERNMENT	cat1,cat2, akt-4	2	10	0
1	5	17	2010	1	30	nlg	2	6	1	1	1	2	1			Cat IV	2	2	2	8	NEGATIVE						6	dtc	44	3				NA	NA	44	44	0.8	1.3	1	0	0	2	2008	GOVERNMENT	cat1,cat2	2	12	0
1	5	18	2010	0	30	nlg	1	6	1	1	1	1	1			Cat IV	3	3	3	3	NEGATIVE						6	yadagirigutta	22	1				NA	NA	50		0.6	1.1				2	2008	GOVERNMENT	cat1,cat2	2	14	0
1	5	19	2010	1	38	nlg	2	6	1	1	1	1	1			Cat IV	2	2	2	8	NEGATIVE						9	chivemla	55	4				NA	NA	54	53	1	1.1	0.9	0	33	4	2005	GOVERNMENT	cat1,cat2	2	18	0
1	5	20	2010	1	60	hyd	2	6	1	1	1	2	2			Cat IV	4	4	4	4	NEGATIVE						9	doodhbowli	63	4				NA	NA			1.1	1.1				2	2009	GOVERNMENT	cat2	2	11	0
1	5	21	2010	1	23	mdk	2	6	1	1	1	1	1			Cat IV	3	3	3	3	NEGATIVE						9	mirzapur	50	4				NA	NA			0.8			25		1	2009	GOVERNMENT	cat2	2	5	0
1	5	22	2010	1	30	mdk	2	6	1	1	1	2	2			Cat IV	4	4	4	4	NEGATIVE						9	sangareddy	30	2				NA	NA			0.6	1.3		157		1	2009	GOVERNMENT	cat1	2	6	0
1	5	23	2010	1	22	rgr	2	6	1	1	1	1	1			Cat IV	2	2	2	8	NEGATIVE						9	vikarabad	55	4				NA	NA	50	50	1.1	1.1	1.5	2	1	2	2008	GOVERNMENT	cat1,cat2	2	14	0
1	5	24	2010	1	40	nlg	2	6	1	1	1	2	1			Cat IV	3	3	3	3	NEGATIVE						4	dtc	39	3				NA	NA			0.7					1	2009	GOVERNMENT	cat2	2	5	0
1	5	25	2010	1	21	hyd	2	6	1	1	1	2	1			Cat IV	2	2	2	8	NEGATIVE						9	doodhbowli	32	2				NA	NA	35	36	1	0.9	1.3	0	0	2	2008	GOVERNMENT	cat1,cat2	2	13	0
1	5	26	2010	1	19	hyd	2	6	1	1	1	1	1			Cat IV	2	2	2	8	NEGATIVE						9	gandhi	33	2				NA	NA	35	37	0.7	0.7	0.8	2	78	1	2009	GOVERNMENT	cat2	2	6	0
1	5	27	2010	1	27	hyd	2	6	1	1	1	1	2			Cat IV	2	2	2	8	NEGATIVE						9	dtc	67	5				NA	NA	68	68	1	1	1	0	0	3	2003	GOVERNMENT	cat3,cat2 twice,	1	24	0
1	5	28	2010	1	46	rgr	2	6	1	1	1	2	1			Cat IV	4	4	4	4	NEGATIVE						9	shivananda	45	4				NA	NA			1					2	2009	GOVERNMENT	cat1,cat2	2	8	0
1	5	29	2010	1	60	rgr	2	6	1	1	1	1	1			Cat IV	2	2	2	8	NEGATIVE						9	tandur	43	3				NA	NA	44	45	0.8	0.9	0.9	42	65	2	2009	GOVERNMENT	cat2,akt-4	2	11	0
1	5	30	2010	1	24	rgr	2	6	1	1	1	2	2			Cat IV	1	2	9	9	NEGATIVE	DPS E.GODAVARI					9	shivananda	55	4				NA	NA	55		1	1	1.6	9		2	2009	GOVERNMENT	cat1,cat2	2	10	0
1	5	31	2010	1	20	hyd	1	6	1	1	1	1	1			Cat IV	4	4	4	4	NEGATIVE						9	osmania	44	3				NA	NA			1			93		1	2009	GOVERNMENT	cat1	2	6	0
1	5	32	2010	0	20	mdk	2	6	1	1	1	1	2			Cat IV	1	1	1	8	NEGATIVE		8/18/2011				9	mirzapur	55	4				NA	NA	55	55	0.7	1.1	1	8	8	2	2009	GOVERNMENT	cat1,cat2	2	7	0
1	5	33	2010	0	23	nlg	2	6	1	1	1	1	1			Cat IV	2	1	4	4	NEGATIVE						6	yadagirigutta	33	2				NA	NA			0.8	1.1		60		2	2009	GOVERNMENT	cat2, akt-4	2	10	0
1	5	34	2010	0	25	hyd	2	6	1	1	1	1	1			Cat IV	2	2	4	4	NEGATIVE						9	doodhbowli	40	3				NA	NA	42		0.9	1.1	1.1	10		2	2009	GOVERNMENT	cat1,cat2	2	10	0
1	5	35	2010	1	43	rgr	2	6	1	1	2	2	1			Cat IV	2	2	2	8	NEGATIVE						9	uppal	76	5				NA	NA	76	79	1.1	1.1	1	20	0	1	2008	GOVERNMENT	cat2	2	13	0
1	5	36	2010	1	48	hyd	1	6	1	1	1	2	2			Cat IV	2	4	4	4	NEGATIVE						9	doodhbowli	57	4				NA	NA	57		0.9	0.8		18		1	2009	GOVERNMENT	cat1	2	6	0
1	5	37	2010	1	29	nlg	2	6	1	1	1	2	2			Cat IV	2	9	2	8	NEGATIVE						1	chinthapalli	52	4				NA	NA	54	55	1.2	1.2		5		2	2009	GOVERNMENT	cat1,cat2	2	12	0
1	5	38	2010	1	24	hyd	1	6	1	1	1	1	1			Cat IV	1	1	4	4	NEGATIVE						5	dabeerpura	60	4				NA	NA	60		0.9	0.8	1.1	49		2	2009	GOVERNMENT	cat1,cat2	2	9	0
1	5	39	2010	1	19	hyd	2	6	1	1	1	1	1			Cat IV	2	2	2	8	NEGATIVE						5	gandhi	56	4				NA	NA	59	62	1.1	0.8	0.8	0	0	2	2009	GOVERNMENT	cat1,cat2	2	9	0
1	5	40	2010	1	60	mdk	2	6	1	1	1	1	2			Cat IV	1	1	2	3	NEGATIVE						9	medak	45	4				NA	NA	45	49	1.1	1	1.3	38	6	1	2009	GOVERNMENT	cat1	2	7	0
1	5	41	2010	0	32	hyd	2	6	3					1	2	Cat IV	1	1	9	3	NEGATIVE		8/18/2011				9	contonment	32	2				NA	NA	32		0.9	0.9	0.8	4		2	2009	GOVERNMENT	cat1,cat2	2	15	0
1	5	42	2010	0	50	hyd	1	6	3					1	1	Cat IV	4	4	4	4	NEGATIVE						9	doodhbowli	51	4				NA	NA			1.6	1.6		7		1	2010	GOVERNMENT	cat1	2	5	0
1	5	43	2010	0	30	hyd	1	6	3					1	1	Cat IV	2	1	2	4	NEGATIVE						9	dtc	30	2				NA	NA	32	32	0.9			0	0	2	2009	GOVERNMENT	cat1,cat2	2	9	0
1	5	44	2010	1	20	mdk	1	6	1	1	1	2	2			Cat IV	2	2	2	8	NEGATIVE						9	tekmal	47	4				NA	NA	51	51	1.1	1.1	1	10	0	2	2009	GOVERNMENT	cat1cat2	2	5	0
1	5	45	2010	1	54	nlg	2	6	1	1	1	2	2			Cat IV	4	4	4	4	NEGATIVE						9	valigonda	65	5				NA	NA			1.1			56		2	2008	GOVERNMENT	cat1cat2	2	23	0
1	5	46	2010	0	30	hyd	2	6	3					1	1	Cat IV	2	2	2	8	NEGATIVE						5	gandhi	48	4				NA	NA	52	53	0.8	0.7	0.7	0	0	2	2004	GOVERNMENT	cat2,twice	1	16	0
1	5	47	2010	1	55	hyd	2	6	3					1	2	Cat IV	3	3	3	3	NEGATIVE						9	osmania	54	4				NA	NA			1.2			5		2	2009	GOVERNMENT	cat2 twice	1	16	0
1	5	48	2010	1	50	hyd	2	6	1	1	1	2	1			Cat IV	4	1	4	4	NEGATIVE		5/18/2011				9	dabeerpura	70	5	25.7117	165		NA	NA	70	70	1.1	1	0.9	72		2	2009	GOVERNMENT	cat2, akt-4	2	9	1
1	5	49	2010	1	22	hyd	2	6	3					1	1	Cat IV	2	2	2	8	NEGATIVE						9	contonment	35	3	13.5026	161		NA	NA	37	38	0.9	0.8	1.2	0	0	4	2008	GOVERNMENT	cat2 thrice, akt-4	2	27	0
1	5	50	2010	0	45	hyd	1	6	3					1	2	Cat IV	2	2	2	8	NEGATIVE						5	dtc	40	3				NA	NA	41	41	0.8	0.7	0.8	0	0	1	2010	GOVERNMENT	cat1	2	5	1
1	5	51	2010	0	18	hyd	2	6	3					1	1	Cat IV	2	2	2	8	NEGATIVE						9	dtc	44	3				NA	NA	45	45	1	0.9	0.9	0	0	2	2008	GOVERNMENT	cat1cat2	2	15	0
1	5	52	2010	1	18	mdk	1	6	3					1	1	Cat IV	2	1	3	3	NEGATIVE		8/18/2011				6	medak	30	2				NA	NA	35		0.7	1				1	2010	GOVERNMENT	cat1	2	6	0
1	5	53	2010	1	25	hyd	2	6	1	1	1	2	1			Cat IV	4	4	4	4	NEGATIVE						5	dabeerpura	34	2				NA	NA	34		1	0.9	1	13		2	2009	GOVERNMENT	cat2 twice	1	10	0
1	5	54	2010	1	15	rgr	1	6	1	1	1	2	2			Cat IV	3	3	3	3	NEGATIVE						5	gandhi	28	2				NA	NA			0.7					2	2008	GOVERNMENT	cat1,cat2	2	9	0
1	5	55	2010	1	20	hyd	1	6	3					1	1	Cat IV	4	4	4	4	NEGATIVE						5	osmania	46	4				NA	NA			0.9			11		1	2010	GOVERNMENT	cat1	2	5	0
1	5	56	2010	1	33	mdk	2	6	3					1	2	Cat IV	2	2	2	8	NEGATIVE						9	siddipet	49	4				NA	NA	50	49	1	1.1	0.8	0	0	1	2009	GOVERNMENT	cat2	2	8	0
1	5	57	2010	0	18	rgr	2	6	1	1	1	1	1			Cat IV	2	2	2	8	NEGATIVE						9	vikarabad	41	3				NA	NA	43	43	0.9	0.9	0.7	0	0	3	2007	GOVERNMENT	cat1,cat 2 twice	1	24	0
1	5	58	2010	0	25	hyd	2	6	3					1	1	Cat IV	1	3	3	3	NEGATIVE						9	dtc	28	2				NA	NA	39	46	0.8	0.9	0.7			2	2009	GOVERNMENT	cat2,akt4	2	14	0
1	5	59	2010	1	45	nlg	1	6	1	1	1	2	1			Cat IV	2	2	2	8	NEGATIVE						1	yadagirigutta	37	3				NA	NA	38	41	0.9	1	1.1	0	21	1	2009	GOVERNMENT	cat1	2	6	0
1	5	60	2010	1	35	mdk	1	6	3					1	2	Cat IV	2	2	2	3	NEGATIVE						2	tekmal	55	4				NA	NA	57	57	1	1.1	1.2	0	15	1	2010	GOVERNMENT	cat1	2	5	0
1	5	61	2010	1	60	rgr	2	6	1	1	1	1	2			Cat IV	2	2	2	3	NEGATIVE						9	medchal	39	3	16.2331	155		NA	NA	39	40	0.9	1.1	0.9	0	0	3	2007	GOVERNMENT	cat1,cat2	2	18	0
1	5	62	2010	1	23	mdk	2	6	3					1	1	Cat IV	2	2	9	8	NEGATIVE						9	mirzapur	42	3	13.7143	175		NA	NA	48	50	1.1	1.2	1.1	0	0	2	2008	OTHER	cat1akt4	2	22	0
1	5	63	2010	1	40	nlg	1	6	1	1	1	2	2			Cat IV	1	1	4	4	POSITIVE						6	yadagirigutta	40	3				NA	NA			1.2	1.1		116		1	2009	GOVERNMENT	cat1	2	6	0
1	5	64	2010	1	31	hyd	2	6	3					1	1	Cat IV	2	2	2	8	NEGATIVE						9	nampally	40	3	14.1723	168		NA	NA	40	42	0.9	1	1	0	0	2	2010	GOVERNMENT	cat1,cat2	2	9	0
1	5	65	2010	0	24	hyd	1	6	3					1	1	Cat IV	2	2	2	8	NEGATIVE						9	dtc	50	4				NA	NA	56	58	0.8	0.6	0.8	0	0	2	2008	GOVERNMENT	cat2,akt4	2	15	0
1	5	66	2010	1	44	nlg	1	6	3					1	2	Cat IV	2	2	2	8	NEGATIVE						5	dtc	32	2				NA	NA	32	35	1	0.7	0.9	0	20	2	2008	GOVERNMENT	cat2,akt4	2	14	0
1	5	67	2010	0	25	hyd	2	6	3					1	2	Cat IV	2	2	2	8	NEGATIVE						9	mahavir	40	3				NA	NA	45	45	0.9	1	0.8	0	0	1	2010	GOVERNMENT	cat1	2	5	0
1	5	68	2010	1	22	hyd	2	6	3					1	1	Cat IV	2	2	2	8	NEGATIVE						9	musheerabad	52	4				NA	NA	56	56	0.7	0.7	0.8	0	0	1	2010	GOVERNMENT	cat2	2	6	0
1	5	69	2010	1	55	mdk	2	6	3					1	1	Cat IV	1	1	2	8	NEGATIVE						9	narsingi	35	3				NA	NA	35	36	1.1	1	1	0	0	2	2009	GOVERNMENT	cat1,cat2	2	10	0
1	5	70	2010	0	16	hyd	3	6	3					1	1	Cat IV	2	2	2	8	NEGATIVE						5	musheerabad	33	2				NA	NA	34	34	0.8	0.8	0.8	0	0	1	2010	GOVERNMENT	cat3	2	2	0
1	5	71	2010	0	48	mdk	2	6	3					1	1	Cat IV	2	2	2	8	NEGATIVE						9	mirzapur	48	4				NA	NA	50		0.9			44		3	2006	GOVERNMENT	cat1,cat2	2	20	0
1	5	72	2010	1	22	hyd	2	6	3					1	1	Cat IV	2	2	2	8	NEGATIVE						10	musheerabad	50	4				NA	NA	51	51	1	1	1	0	0	1	2009	GOVERNMENT	cat2	2	8	0
1	5	73	2010	1	45	hyd	1	6	3					1	1	Cat IV	4	4	4	4	NEGATIVE						9	dtc	52	4				NA	NA			1.1					1	2010	GOVERNMENT	cat1	2	5	0
1	5	74	2010	1	22	hyd	1	6	1	1	1	2	1			Cat IV	4	4	4	4	NEGATIVE						9	dtc	45	4	14.2028	178		NA	NA			1.1			38		2	2008	GOVERNMENT	cat1,cat2	2	11	0
1	5	75	2010	1	42	mdk	1	6	3					1	1	Cat IV	2	2	2	8	POSITIVE						9	mirzapur	48	4				NA	NA	48	51	1.1	1.1	1.1	34	6	1	2010	GOVERNMENT	cat1	2	4	0
1	5	76	2010	1	35	mdk	2	6	3					1	2	Cat IV	2	1	1	8	NEGATIVE		8/18/2011				9	sangareddy	39	3				NA	NA	40	40	0.9	1.2	1	2		3	2007	GOVERNMENT	cat1,cat2 twice	1	16	0
1	5	77	2010	1	40	rgr	2	6	1	1	1	1	2			Cat IV	2	2	2	8	NEGATIVE						9	dabeerpura	56	4				NA	NA	58	60	1.2	1.2	1.1			2	2008	GOVERNMENT	cat2	2	11	0
1	5	78	2010	0	22	hyd	2	6	3					1	1	Cat IV	2	2	2	8	NEGATIVE		8/18/2011				9	mahavir	32	2				NA	NA	36	37	0.8	1	0.8	0	0	3	2007	GOVERNMENT	cat1,cat2 twice	1	22	0
1	5	79	2010	1	18	rgr	1	6	1	1	1	2	2			Cat IV	2	2	1	8	NEGATIVE						9	uppal	44	3				NA	NA	44	44	1.2	1.4	1.3	0	83	1	2009	GOVERNMENT	cat1	2	5	0
1	5	80	2010	1	24	hyd	2	6	3					1	1	Cat IV	2	2	2	8	NEGATIVE						10	musheerabad	68	5				NA	NA	68	68	0.9	0.9	0.9	0	0	1	2010	GOVERNMENT	cat2	2	5	0
1	5	81	2010	1	56	hyd	2	6	3					1	1	Cat IV	2	9	9	8	NEGATIVE						9	dabeerpura	60	4				NA	NA	62	60	1.1	1	0.8	80	6	2	2008	GOVERNMENT	cat1cat2	2	15	0
1	5	82	2010	1	35	hyd	1	6	3					1	1	Cat IV	9	9	9	9	NEGATIVE	tranferred to DPS guntur CAT IV NO 11/2011					5	mahavir	43	3				NA	NA			1					1	2010	GOVERNMENT	cat2	2	4	0
1	5	83	2010	0	65	hyd	2	6	3					1	1	Cat IV	2	2	9	8	NEGATIVE						9	mahavir	22	1				NA	NA	24	25	0.8	0.8	0.9	0	0	2	2009	GOVERNMENT	cat1,cat2	2	14	0
1	5	84	2010	0	18	hyd	2	6	1	1	1	1	1			Cat IV	2	2	2	3	NEGATIVE						9	contonment	29	2				NA	NA	30	30	0.8	0.8	0.8			3	2008	GOVERNMENT	cat1,cat2 twice	1	19	0
1	5	85	2010	1	20	rgr	2	6	1	1	1	1	2			Cat IV	2	2	2	8	NEGATIVE						9	shivananda	45	4				NA	NA	47	50	1.3	1.5	1.6	0	3	1	2009	GOVERNMENT	cat2	2	6	0
1	5	86	2010	0	45	rgr	2	6	1	1	1	1	1			Cat IV	2	1	2	3	NEGATIVE		8/18/2011				9	shivananda	29	2				NA	NA	30	28	0.9	1	1.6	2	21	2	2007	GOVERNMENT	cat1cat2	2	12	0
1	5	87	2010	0	17	rgr	2	6	1	1	1	2	1			Cat IV	3	3	3	3	NEGATIVE						9	shivananda	28	2				NA	NA			0.6					3	2007	GOVERNMENT	cat2twice,akt-4	1	28	0
1	5	88	2010	0	15	hyd	2	6	1	1	1	2	2			Cat IV	2	2	2	8	NEGATIVE						9	doodhbowli	32	2				NA	NA	34	36	0.6	0.7	0.8	0	0	2	2009	GOVERNMENT	cat1cat2	2	14	0
1	5	89	2010	0	28	hyd	2	6	1	1	1	1	1			Cat IV	1	3	3	3	NEGATIVE		5/18/2011				9	gandhi	46	4				NA	NA			0.7	0.7				2	2008	GOVERNMENT	cat1cat2	2	26	0
1	5	90	2010	0	40	mdk	2	6	3					1	1	Cat IV	2	2	2	8	NEGATIVE						9	sangareddy	35	3				NA	NA	36	40	0.7	1	1.1	0	7	2	2008	GOVERNMENT	cat1cat2	2	14	0
1	5	91	2010	0	32	rgr	2	6	1	1	1	2	2			Cat IV	2	2	2	8	NEGATIVE						9	uppal	62	4				NA	NA	62	69	0.9	1	0.9	0	0	3	2010	GOVERNMENT	cat2thrice	1	8	0
1	5	92	2010	1	35	nlg	2	6	1	1	1	2	2			Cat IV	2	2	2	8	NEGATIVE						9	valigonda	65	5				NA	NA	63	66	1.1	1.1	1.2	0	0	2	2009	GOVERNMENT	cat2,hrze	2	11	0
1	5	93	2010	1	44	nlg	1	6	1	1	1	1	1			Cat IV	1	1	2	8	NEGATIVE		8/18/2011				9	valigonda	35	3				NA	NA	36	37	1	1	1	0	0	3	2007	GOVERNMENT	cat1,cat2, akt-4	2	15	0
1	5	94	2010	1	43	mdk	1	6	3					1	2	Cat IV	2	2	2	8	NEGATIVE						9	narsingi	37	3				NA	NA	37	38	0.8	1.3	1.2	0	0	2	2007	GOVERNMENT	cat1cat2	2	12	0
1	5	95	2010	1	26	hyd	1	6	1	1	1	1	1			Cat IV	2	2	2	8	NEGATIVE						9	doodhbowli	40	3				NA	NA	42	42	0.9	1.8	0.5	0	0	2	2008	GOVERNMENT	cat1cat2	2	20	0
1	5	96	2010	0	30	rgr	2	6	1	1	1	1	1			Cat IV	2	2	2	8	NEGATIVE						9	uppal	45	4				NA	NA	60		0.8	1	0.8			2	2008	GOVERNMENT	cat1cat2	2	18	0
1	5	97	2010	1	40	hyd	1	6	3					1	1	Cat IV	2	2	2	8	NEGATIVE						9	doodhbowli	70	5				NA	NA	73	81	1.2	1.2	1.3	0	15	1	2010	GOVERNMENT	cat1	2	5	0
1	5	98	2010	1	47	hyd	1	6	3					1	1	Cat IV	2	2	2	8	NEGATIVE						9	mahavir	45	4				NA	NA	45	47	0.9	1	1.2	0	13	2	2008	GOVERNMENT	cat1cat2	2	13	0
1	5	99	2010	1	47	hyd	2	6	1	1	1	2	2			Cat IV	2	1	1	8	NEGATIVE						9	medchal	40	3				NA	NA	41		1.2	1	0.9	0	34	3	2007	GOVERNMENT	cat1,cat2 twice	1	14	0
1	5	100	2010	1	40	hyd	2	6	3					1	2	Cat IV	2	2	9	8	NEGATIVE						5	gandhi	50	4				NA	NA	53	52	1	0.9	0.9	0	29	2	2008	GOVERNMENT	cat1cat2	2	15	0
1	5	101	2010	1	34	hyd	2	6	3					1	2	Cat IV	2	2	3	3	NEGATIVE						9	musheerabad	87	5				NA	NA			1.1					1	2010	GOVERNMENT	cat2	2	5	1
1	5	102	2010	0	35	hyd	2	6	1	1	1	2	1			Cat IV	2	2	2	8	NEGATIVE						9	nampally	40	3				NA	NA	40	41	1	0.8	0.8	2	10	3	2008	GOVERNMENT	cat2 twice,akt-4	1	19	0
1	5	103	2010	1	58	nlg	2	6	1	1	1	1	1			Cat IV	2	2	2	8	NEGATIVE						2	yadagirigutta	48	4				NA	NA	49	50	1	1.1	1	6		2	2009	GOVERNMENT	cat1cat2	2	13	0
1	5	104	2010	1	22	hyd	2	6	1	1	1	1	2			Cat IV	2	9	1	3	NEGATIVE						9	dabeerpura	35	3				NA	NA	37	37	0.9	1	0.9	52	7	3	2008	GOVERNMENT	cat2 twice,cat3	1	16	0
1	5	105	2010	0	36	nlg	2	6	3					1	2	Cat IV	2	2	2	8	NEGATIVE						9	valigonda	35	3				NA	NA	33	35	0.7	0.8	0.9	0	0	2	2009	PRIVATE	akt-4,hrze	2	6	0
1	5	106	2010	0	38	hyd	1	6	3					1	1	Cat IV	2	2	9	8	POSITIVE						5	gandhi	29	2				NA	NA	31	32	0.8	0.8	0.8	0	0	1	2010	GOVERNMENT	cat1	2	6	0
1	5	107	2010	1	45	rgr	2	6	3					1	1	Cat IV	2	2	2	8	NEGATIVE						9	shivananda	42	3				NA	NA	42	48	0.9	0.8	0.5	0	0	1	2010	GOVERNMENT	cat1	2	5	0
1	5	108	2010	0	18	hyd	1	6	3					1	2	Cat IV	2	1	2	8	NEGATIVE		8/18/2011				5	dabeerpura	42	3				NA	NA	45	45	0.9	1.2	0.9	42	0	2	2010	GOVERNMENT	cat1,cat2	2	9	0
1	5	109	2010	0	44	rgr	2	6	3					1	2	Cat IV	1	1	2	8	NEGATIVE						9	shivananda	64	4				NA	NA	68	64	1	0.9	2.1	0	18	3	2007	GOVERNMENT	cat2 twice,akt-4	1	15	0
1	5	110	2010	0	19	rgr	2	6	1	1	1	1	1			Cat IV	2	4	4	4	NEGATIVE						9	medchal	36	3				NA	NA	36		0.8	0.9		41		2	2007	GOVERNMENT	cat2,akt4	2	12	0
1	5	111	2010	0	50	nlg	2	6	3					1	2	Cat IV	2	2	2	8	NEGATIVE						9	dtc	27	2				NA	NA	31	30	1	0.9	0.9	0	14	2	2009	GOVERNMENT	cat1,cat2	2	9	0
1	5	112	2010	1	40	rgr	2	6	3					1	1	Cat IV	2	2	2	8	NEGATIVE						9	ibrahimpatnam	40	3				NA	NA	42	40	1.2	1	1	0	17	2	2009	GOVERNMENT	cat1,cat2	2	11	0
1	5	113	2010	0	35	rgr	1	6	1	1	1	1	1			Cat IV	4	4	4	4	NEGATIVE						9	vikarabad	35	3				NA	NA			0.9			50		1	2010	GOVERNMENT	cat1	2	5	0
1	5	114	2010	0	28	rgr	2	6	3					1	1	Cat IV	2	2	9	8	NEGATIVE						9	medchal	28	2				NA	NA	29	30	0.8	1	1.1	7	7	1	2010	GOVERNMENT	cat2	2	2	0
1	5	115	2010	0	35	rgr	2	6	3					1	2	Cat IV	2	2	2	8	NEGATIVE						9	parigi	52	4				NA	NA	53	53	0.9	1.1	1.1	0	0	2	2009	GOVERNMENT	cat1cat2	2	18	0
1	5	116	2010	1	26	rgr	2	6	3					1	1	Cat IV	2	2	2	8	NEGATIVE						9	medchal	32	2				NA	NA	33	35	0.8	1	0.9	7	0	1	2009	GOVERNMENT	cat2	2	9	0
1	5	117	2010	1	50	rgr	1	6	3					1	1	Cat IV	2	2	2	8	NEGATIVE						9	ibrahimpatnam	55	4				NA	NA	59	60	1.1	1	1.5	0	32	1	2010	GOVERNMENT	cat1	2	6	0
1	5	118	2010	1	25	rgr	1	6	3					1	1	Cat IV	2	2	2	8	NEGATIVE						9	dabeerpura	45	4	17.1468	162		NA	NA	48	52	0.8	0.9	1	0	5	1	2010	GOVERNMENT	cat1	2	6	0
1	5	119	2010	1	60	nlg	2	6	3					1	1	Cat IV	4	4	4	4	NEGATIVE						1	chinthapalli	40	3	16.6493	155		NA	NA			0.4					2	2008	GOVERNMENT	cat1cat2	2	22	0
1	5	120	2010	1	38	nlg	2	6	3					1	1	Cat IV	2	2	1	8	NEGATIVE						9	nidamanoor	49	4				NA	NA	56	58	0.9	1.4	1.1	0	0	2	2008	GOVERNMENT	cat1cat2	2	18	0
1	5	121	2010	0	21	rgr	2	6	3					1	1	Cat IV	2	2	2	8	NEGATIVE						9	medchal	40	3				NA	NA	44	44	0.8			19	0	3	2007	GOVERNMENT	cat1,cat2 twice	1	18	0
1	5	122	2010	1	60	mdk	2	6	3					1	1	Cat IV	3	3	3	3	NEGATIVE						9	sangareddy	45	4	16.3304	166		NA	NA			1			1	0	2	2009	GOVERNMENT	cat1,cat2	2	11	0
1	5	123	2010	0	19	rgr	2	6	3					1	1	Cat IV	2	3	3	3	NEGATIVE						9	dabeerpura	38	3				NA	NA			0.8					2	2008	GOVERNMENT	cat1cat2	2	22	0
1	5	124	2010	0	31	rgr	2	6	3					1	1	Cat IV	2	2	2	8	NEGATIVE						9	vikarabad	32	2				NA	NA	34	38	0.8	0.7	0.9	0	0	1	2010	GOVERNMENT	cat2	2	6	0
1	5	125	2010	0	25	nlg	2	6	3					1	1	Cat IV	2	2	2	8	NEGATIVE						9	dtc	45	4	20	150		NA	NA	48	55	0.8	1	1	3	2	2	2007	GOVERNMENT	cat2,akt-4	2	6	0
1	5	126	2010	1	48	nlg	1	6	3					1	1	Cat IV	3	3	3	3	NEGATIVE						9	chinthapalli	46	4	16.2982	168		NA	NA			1.2					1	2010	GOVERNMENT	cat1	2	6	0
1	5	127	2010	1	35	mdk	1	6	3					1	1	Cat IV	1	2	2	8	POSITIVE						9	narsingi	45	4	17.1468	162		NA	NA	50	50	1	1.5	1.2	10	0	1	2010	GOVERNMENT	cat1	2	5	0
1	5	128	2010	1	24	hyd	2	6	3					1	2	Cat IV	2	1	2	8	NEGATIVE						9	musheerabad	52	4	19.5717	163		NA	NA	52	52	1.2	1	1	0	0	1	2010	GOVERNMENT	cat2	2	9	0
1	5	129	2010	1	23	rgr	2	6	3					1	2	Cat IV	2	2	2	8	NEGATIVE						9	shivananda	44	3				NA	NA	48	50	0.8	0.4	0.6	0	0	2	2009	GOVERNMENT	cat1cat2	2	12	0
1	5	130	2010	1	55	rgr	2	6	3					1	1	Cat IV	4	4	4	4	NEGATIVE						9	vikarabad	52	4	18.2066	169		NA	NA			1					2	2009	OTHER	cat1,akt-4	2	24	0
1	5	131	2010	1	55	rgr	1	6	3					1	2	Cat IV	2	2	2	8	NEGATIVE						9	uppal	46	4				NA	NA	47	50	1.2	1	1	0	3	1	2010	GOVERNMENT	cat1	2	5	0
1	5	132	2010	1	37	rgr	2	6	3					1	1	Cat IV	2	2	2	8	NEGATIVE						9	uppal	44	3	16.7657	162		NA	NA	43	45	1	1.5	1	0	0	2	2010	GOVERNMENT	cat1,cat2	2	7	0
1	5	133	2010	1	55	rgr	2	6	3					1	2	Cat IV	2	2	2	8	NEGATIVE						9	tandur	43	3	16.1843	163		NA	NA	45	44	1	1	0.9	0	14	2	2009	GOVERNMENT	cat2twice	1	16	0
1	5	134	2010	1	22	rgr	2	6	3					1	1	Cat IV	2	1	9	4	NEGATIVE						9	tandur	60	4	20.5191	171		NA	NA	54		1.1	1	1	0	0	2	2009	GOVERNMENT	cat2 twice	1	16	0
1	5	135	2010	1	46	rgr	2	6	3					1	2	Cat IV	2	2	2	8	NEGATIVE						9	shivananda	40	3				NA	NA	40	40	1.9	1.6	1.5	0	0	2	2009	GOVERNMENT	cat1cat2	2	15	0
1	5	136	2010	1	21	rgr	1	6	3					1	1	Cat IV	9	9	9	4	NEGATIVE						9	shivananda	40	3	15.2416	162		NA	NA			0.9			36		1	2009	GOVERNMENT	cat1	2	5	0
1	5	137	2010	1	44	rgr	2	6	3					1	1	Cat IV	1	2	3	3	NEGATIVE		8/18/2011				9	dabeerpura	50	4				NA	NA	53	49	0.9	1.2		0	4	1	2010	GOVERNMENT	cat2	2	4	0
1	5	138	2010	1	55	nlg	2	6	3					1	2	Cat IV	1	2	2	8	NEGATIVE						9	valigonda	40	3			2011-12-04	NA	NA	42	44	0.7	2.4	2.4	20	0	2	2008	GOVERNMENT	cat2,akt4	2	16	0
1	5	139	2010	0	25	mdk	1	6	3					1	1	Cat IV	2	2	2	8	NEGATIVE						9	narsingi	35	3				NA	NA	35	40	0.8	1.3	1.1	0	0	1	2010	GOVERNMENT	cat1	2	6	0
1	5	140	2010	1	25	mdk	2	6	3					1	1	Cat IV	3	3	3	3	NEGATIVE						9	mirzapur	44	3	13.5802	180		NA	NA	44		0.7	1	1.1	0		2	2009	OTHER	cat1cat2	2	22	0
1	5	141	2010	1	60	nlg	2	6	3					1	1	Cat IV	2	2	2	8	NEGATIVE						9	valigonda	50	4				NA	NA	53	55	0.5	1.2	1.2	0	0	3	2008	GOVERNMENT	cat2 twice,akt-4	1	15	0
1	5	142	2010	1	41	mdk	2	6	3					1	2	Cat IV	2	2	1	8	NEGATIVE						6	siddipet	40	3				NA	NA	39	38	0.9	1	0.9	6	0	2	2009	GOVERNMENT	cat1cat2	2	11	0
1	5	1	2011	1	65	rgr	2	6	3					1	1	Cat IV	2	2	2	8	NEGATIVE						9	tandur	45	4				NA	NA	45	50	1	1.2	1	7	7	1	2010	GOVERNMENT	cat2	2	6	0
1	5	3	2011	1	48	rgr	2	6	3					1	1	Cat IV	2	2	2	8	NEGATIVE						9	vikarabad	46	4				NA	NA	47	47	1.1	1.2		0	104	2	2009	GOVERNMENT	cat1cat2	2	16	0
1	5	4	2011	1	25	rgr	2	6	3					1	1	Cat IV	2	2	2	8	NEGATIVE						9	ibrahimpatnam	60	4	22.0386	165		NA	NA	62	63	1	1	0.9	0	0	2	2009	GOVERNMENT	cat1,cat2	2	11	0
1	5	5	2011	1	20	mdk	2	6	3					1	1	Cat IV	2	1	4	3	NEGATIVE		8/18/2011				9	sangareddy	45	4	15.5709	170		NA	NA	44	45	0.9	1		77	106	2	2008	OTHER	cat1,akt-4	2	26	0
1	5	6	2011	1	55	rgr	2	6	3					1	2	Cat IV	2	2	4	3	NEGATIVE						9	tandur	51	4	18.0697	168		NA	NA	46		1.1	1.1	1.1	0		2	2009	GOVERNMENT	cat1,cat2	2	12	0
1	5	7	2011	1	48	rgr	2	6	3					1	1	Cat IV	9	9	2	8	NEGATIVE						9	parigi	60	4	22.8624	162		NA	NA	62	62	1.4	1.1	1	0	0	2	2009	GOVERNMENT	cat1,cat2	2	12	0
1	5	8	2011	1	50	hyd	1	6	3					1	1	Cat IV	4	4	4	4	NEGATIVE						10	musheerabad	50	4				NA	NA	50		1.2			31		1	2010	GOVERNMENT	cat1	2	5	0
1	5	9	2011	1	55	hyd	2	6	3					1	1	Cat IV	3	3	3	3	NEGATIVE						5	contonment	52	4	17.9931	170		NA	NA			1					2	2009	GOVERNMENT	cat2,att	2	7	0
1	5	10	2011	1	35	mdk	1	6	3					1	1	Cat IV	2	2	9	8	NEGATIVE						5	mirzapur	72	5				NA	NA	70	69	1.1	1.3	1.3	0	0	1	2010	GOVERNMENT	cat1	2	6	1
1	5	11	2011	1	30	nlg	2	6	3					1	1	Cat IV	2	2	2	8	NEGATIVE						9	nidamanoor	56	4				NA	NA	56	70	0.9	1.2	1.5	0	14	2	2008	GOVERNMENT	cat2,akt-4	2	18	0
1	5	12	2011	1	55	nlg	2	6	3					1	2	Cat IV	2	2	2	8	NEGATIVE						9	dtc	44	3				NA	NA	47	56	0.9	1	0.8	0	0	2	2009	GOVERNMENT	cat2,akt-4	2	20	0
1	5	13	2011	0	25	nlg	2	6	3					1	1	Cat IV	2	9	2	8	NEGATIVE						9	ibrahimpatnam	42	3				NA	NA	50	46	0.9	1.2	1	0	0	2	2009	GOVERNMENT	cat1,akt-4	2	14	0
1	5	14	2011	1	21	rgr	2	6	1	1	1	1	1			Cat IV	1	4	4	4	NEGATIVE						9	dtc	42	3				NA	NA	44		0.9	0.7				2	2008	GOVERNMENT	cat1,cat2	2	14	0
1	5	15	2011	1	18	nlg	2	6	3					1	1	Cat IV	2	2	2	8	NEGATIVE						9	uppal	35	3				NA	NA	44	43	0.6	1	0.9	0	0	2	2009	GOVERNMENT	cat1,cat2	2	11	0
1	5	16	2011	1	24	rgr	2	6	3					1	1	Cat IV	2	2	2	8	NEGATIVE						5	musheerabad	58	4				NA	NA	58	58	0.9	0.8		0	0	2	2008	GOVERNMENT	cat1,cat2	2	10	0
1	5	17	2011	1	30	hyd	2	6	3					1	1	Cat IV	2	2	2	8	NEGATIVE						9	musheerabad	33	2				NA	NA	58	59	0.9	0.9	0.9	0	0	1	2010	GOVERNMENT	cat2,akt-4	2	6	0
1	5	18	2011	1	55	hyd	2	6	3					1	1	Cat IV	2	1	3	3	NEGATIVE						9	dtc	55	4				NA	NA			1.1			18		2	2003	GOVERNMENT	cat1,cat2	2	9	0
1	5	19	2011	1	45	nlg	2	6	1	1	1	1	1			Cat IV	4	4	4	4	NEGATIVE						11	NA						NA	NA			1.1					2	2009	GOVERNMENT	cat1,cat2	2	18	0
1	5	20	2011	1	54	hyd	2	6	3					1	1	Cat IV	1	1	3	3	NEGATIVE						9	nampally	55	4				NA	NA			1.1			18		2	2010	GOVERNMENT	cat2,akt-4	2	7	0
1	5	21	2011	0	34	hyd	1	6	3					1	1	Cat IV	2	2	9	8	NEGATIVE						9	doodhbowli	30	2				NA	NA	33	34	0.9	1	0.9	0	0	1	2010	GOVERNMENT	cat1	2	6	0
1	5	22	2011	0	16	hyd	1	6	3					1	1	Cat IV	2	2	2	8	NEGATIVE						9	doodhbowli	30	2				NA	NA	32	34	0.7	0.8	0.9	0	0	1	2010	GOVERNMENT	cat1	2	6	0
1	5	23	2011	1	55	nlg	2	6	3					1	1	Cat IV	2	2	2	8	NEGATIVE						9	chivemla	38	3				NA	NA	39	39	1	0.9	0.9	0	0	2	2009	GOVERNMENT	cat2,akt-4	2	13	0
1	5	24	2011	1	45	hyd	2	6	3					1	1	Cat IV	3	3	3	3	NEGATIVE						5	gandhi	45	4				NA	NA			0.7					2	2009	OTHER	cat2,akt-4	2	22	0
1	5	25	2011	0	33	hyd	2	6	1	1	1	1	1			Cat IV	9	9	9	9	NEGATIVE						9	nampally	65	5				NA	NA			0.8					2	2009	OTHER	cat2,akt-4	2	18	0
1	5	26	2011	1	27	hyd	2	6	3					1	1	Cat IV	2	1	9	8	NEGATIVE						9	dabeerpura	27	2				NA	NA	41	40	0.8	0.9	1	80	0	2	2009	GOVERNMENT	cat1cat2	2	15	0
1	5	27	2011	1	27	nlg	2	6	3					1	1	Cat IV	2	2	2	8	NEGATIVE						6	chilkur	49	4				NA	NA	49	49	1.1	1.1	0.8	0	0	2	2009	GOVERNMENT	cat2,akt-4	2	11	0
1	5	28	2011	1	40	nlg	2	6	3					1	1	Cat IV	2	2	4	4	NEGATIVE						9	yadagirigutta	44	3				NA	NA	46		0.8	1	1	96		2	2009	GOVERNMENT	cat1cat2	2	17	0
1	5	29	2011	1	35	mdk	1	6	3					1	2	Cat IV	2	2	2	8	NEGATIVE						9	sangareddy	44	3				NA	NA	40	45	0.9	1	1	0	0	1	2010	GOVERNMENT	CAT1	2	5	0
1	5	30	2011	0	42	rgr	1	6	3					1	1	Cat IV	2	2	2	3	NEGATIVE						9	tandur	44	3				NA	NA	45	50	1.1	1.1	1.1	25	30	1	2010	GOVERNMENT	cat1	2	4	0
1	5	31	2011	0	23	hyd	1	6	3					1	1	Cat IV	2	2	2	8	NEGATIVE						9	dtc	41	3				NA	NA	45	45	0.5	0.6	0.6	0	0	2	2009	GOVERNMENT	cat1cat2	2	14	0
1	5	32	2011	1	24	hyd	1	6	3					1	1	Cat IV	3	3	3	3	NEGATIVE						9	nampally	40	3				NA	NA			1.1	0.9		63		2	2009	GOVERNMENT	cat1cat2	2	11	0
1	5	33	2011	1	32	rgr	2	6	3					1	1	Cat IV	2	4	4	4	NEGATIVE						9	uppal	53	4				NA	NA			1.3	1		65		2	2009	GOVERNMENT	cat1cat2	2	12	0
1	5	34	2011	1	55	nlg	1	6	3					1	1	Cat IV	2	4	4	4	NEGATIVE						9	nidamanoor	66	5				NA	NA			2.1			60		1	2010	GOVERNMENT	hrez	2	6	0
1	5	35	2011	1	55	mdk	2	6	1	1	1	2	1			Cat IV	2	4	4	4	NEGATIVE						9	sangareddy	50	4				NA	NA			1.1	0.9		38		2	2008	GOVERNMENT	cat1cat2	2	10	0
1	5	36	2011	1	23	rgr	2	6	3					1	1	Cat IV	2	2	2	8	NEGATIVE						9	vikarabad	57	4				NA	NA	58	60	1.2	1.3	1	0	0	2	2009	GOVERNMENT	cat1cat2	2	9	0
1	5	37	2011	1	28	rgr	2	6	3					1	2	Cat IV	4	4	4	4	NEGATIVE						9	ibrahimpatnam	60	4				NA	NA			1.1			62		2	2008	OTHER	cat1cat2	2	14	0
1	5	38	2011	1	45	rgr	1	6	3					1	2	Cat IV	3	3	3	3	NEGATIVE						9	vikarabad	39	3				NA	NA			1.2					1	2010	GOVERNMENT	CAT1	2	5	0
1	5	39	2011	1	20	rgr	1	6	3					1	1	Cat IV	2	2	2	3	NEGATIVE						9	dabeerpura	32	2				NA	NA			0.7	1.1	1			1	2010	GOVERNMENT	cat1	2	2	0
1	5	40	2011	1	40	hyd	2	7	3					1	1	Cat IV	9	9	2	3	NEGATIVE						9	musheerabad	45	4	14.6939	175		NA	NA	45	45	1.1	1	1	0		2	2009	GOVERNMENT	cat1cat2	2	14	0
1	5	41	2011	1	62	hyd	1	6	3					1	1	Cat IV	2	2	2	8	NEGATIVE						10	osmania	40	3				NA	NA	39	42	0.9	1	0.5	0	0	1	2010	GOVERNMENT	CAT1	2	5	0
1	5	42	2011	0	11	hyd	2	6	3					1	1	Cat IV	2	2	1	8	NEGATIVE						9	musheerabad	19	1				NA	NA	19	21	0.9	0.8	0.8	0	0	1	2010	GOVERNMENT	cat1	2	5	0
1	5	43	2011	1	26	hyd	2	7	3					1	1	Cat IV	2	2	2	8	NEGATIVE						9	dtc	44	3	12.8561	185		NA	NA	46	47	1	1	1	0	0	2	2009	OTHER	cat1akt4	2	14	0
1	5	44	2011	1	56	hyd	1	6	3					1	1	Cat IV	2	2	2	8	NEGATIVE						9	doodhbowli	50	4	18.3655	165		NA	NA	51	53	1	1	1	17	4	1	2010	GOVERNMENT	cat1	2	5	0
1	5	45	2011	1	63	mdk	2	6	3					1	2	Cat IV	2	3	3	3	NEGATIVE						9	tekmal	47	4	13.7327	185		NA	NA	45	45	0.8	1	0.9	0	0	2	2009	GOVERNMENT	cat1,cat2	2	13	0
1	5	46	2011	0	38	rgr	2	6	3					1	1	Cat IV	2	2	2	8	NEGATIVE						9	medchal	42	3				NA	NA	44	47	0.8	1	1	0	0	1	2010	GOVERNMENT	cat1	2	4	0
1	5	47	2011	1	22	mdk	2	6	3					1	1	Cat IV	2	2	2	8	NEGATIVE						9	mirzapur	44	3	14.2045	176		NA	NA	48	49	0.8	1.1	1	0	0	1	2010	GOVERNMENT	cat1	2	5	0
7	6	1	2010	0	19	JPG	2	6	1	1	1	1	1			Cat IV	2	2	9	2	NEGATIVE						4	ALIPURDUAR	48	4	19.4734	157		PSYCOSIS PROBLEM	NA	36	42	0.7	0	0.8	20	2	1	2007	GOVERNMENT	CAT-11	2	8	0
7	6	2	2010	1	25	JPG	2	6	1	1	1	1	1			Cat IV	2	2	2	2	NEGATIVE						4	DTC JPG	42	3	14.0332	173		NA	NA	47		0.8	0.8	0	0	0	1	2001	GOVERNMENT	CAT-11	2	8	0
7	6	3	2010	1	40	JPG	2	6	1	1	1	1	1			Cat IV	2	2	2	2	NEGATIVE						4	NAGRAKATA	56	4	18.7109	173		NA	NA	60	62	0.8	0	0.7	0	0	1	2008	GOVERNMENT	CAT-11	2	8	0
7	6	4	2010	1	60	KBR	2	6	1	1	1	1	1			Cat IV	1	9	2	8	NEGATIVE						4	DTC KBR	35	3	12.8558	165		NA	NA		39	0.9	0	0	0	39	1	2008	GOVERNMENT	CAT-11	2	8	0
7	6	5	2010	1	22	KBR	2	6	1	1	1	1	1			Cat IV	2	9	2	8	NEGATIVE						4	DTC KBR	53	4	18.7783	168		NA	NA			1	0	0	84	33	1	2008	GOVERNMENT	CAT-11	2	8	0
7	6	6	2010	1	45	KBR	2	6	1	1	1	1	1			Cat IV	2	9	9	8	NEGATIVE						4	MATHABHANGA	40	3	15.625	160		NA	NA		44	1.7	0.5	0	46	19	1		GOVERNMENT	CAT-11	2	8	0
7	6	7	2010	0	24	DJL	2	5	1	1	1	1	1			Cat IV	1	2	1	8	NEGATIVE						11	KOURSEONG	39	3	16.2331	155		NA	NA	39	44	0.8	0.6	0.8	0	0	1	2008	GOVERNMENT	CAT-11	2	8	0
7	6	8	2010	0	20	DJL	2	6	1	1	1	1	1			Cat IV	2	2	2	8	NEGATIVE						4	KOURSEONG	40	3	16.6493	155		NA	NA	45	47	6	0.6	0.8	0	0	1	2008	GOVERNMENT	CAT-11	2	8	0
7	6	9	2010	1	48	DJL	2	6	1	1	1	1	1			Cat IV	3	3	3	3	NEGATIVE						4	SILIGURI	44	3		0		NA	NA			0	0	0	0	0	1	2007	GOVERNMENT	CAT-11	2	8	0
7	6	10	2010	1	44	DJL	2	6	1	1	1	1	1			Cat IV	2	2	3	3	NEGATIVE						4	SILIGURI	39	3		0		NA	NA			0.8	0	0	0	0	1	2008	GOVERNMENT	CAT-11	2	8	0
7	6	11	2010	1	17	DJL	2	4	1	1	1	1	1			Cat IV	2	2	2	8	NEGATIVE						4	SILIGURI	39	3	13.984	167		NA	NA	48	60	0.8	0	0.6	0	0	1		GOVERNMENT	CAT-11	2	8	0
7	6	12	2010	1	34	JPG	2	6	1	1	1	1	1			Cat IV	2	2	9	8	NEGATIVE						4	DTC JPG	35	3	15.1489	152		NA	NA	34	35	0.7	0		0	7	1	2001	GOVERNMENT	CAT-11	2	8	0
7	6	13	2010	0	43	DJL	2	5	1	1	1	1	2			Cat IV	2	2	2	8	NEGATIVE						4	SILIGURI	32	2	13.8504	152		NA	NA	32	38	0.9	0.7		0	0	1	1995	GOVERNMENT	CAT-11	2	8	0
7	6	14	2010	1	31	DJL	2	5	1	1	1	1	1			Cat IV	2	9	2	8	NEGATIVE						4	SILIGURI	46	4	16.494	167		NA	NA	50	59	0.8	0.6	0.6	0	0	1	2007	GOVERNMENT	CAT-11	2	8	0
7	6	15	2010	0	50	DJL	2	7	1	1	1	1	1			Cat IV	9	9	3	3	NEGATIVE						4	SILIGURI	31	2	12.5766	157		NA	NA	31		0.8	0	0	38	0	1		GOVERNMENT	CAT-11	2	8	0
7	6	16	2010	1	35	KBR	2	6	1	1	1	1	1			Cat IV	1	2	9	8	NEGATIVE						4	MATHABHANGA	40	3	15.625	160		NA	NA		43	0.8	0	0	9	20	1	2006	GOVERNMENT	CAT-11	2	8	0
7	6	17	2010	1	17	DJL	2	7	1	1	1	1	2			Cat IV	2	2	2	8	NEGATIVE						4	KALINGPONG	34	2	14.7161	152		NA	NA	33	35	0.7	0.8	0	0	0	1	2007	GOVERNMENT	CAT-11	2	8	0
7	6	18	2010	0	21	DJL	2	6	1	1	1	1	2			Cat IV	2	2	9	8	NEGATIVE						4	DTC DJL	40	3	17.313	152		NA	NA	35	36	0.6	0.6	0.7	0	0	1	2009	GOVERNMENT	CAT-11	2	8	0
7	6	19	2010	0	30	DJL	2	6	1	1	1	1	1			Cat IV	2	2	9	8	NEGATIVE						4	TAKDA	54	4	23.3726	152		NA	NA	51	48	0.9	0.8	0.8	0	0	1	2007	GOVERNMENT	CAT-11	2	8	0
7	6	20	2010	1	25	DJL	2	6	1	1	1	1	2			Cat IV	1	9	9	8	NEGATIVE						4	DTC DJL	40	3	14.6924	165		NA	NA	41	43	0.9	0.6	0.7	0	0	1		GOVERNMENT	CAT-11	2	8	0
7	6	21	2010	1	26	DJL	2	5	1	1	1	1	1			Cat IV	2	1	1	8	NEGATIVE						4	TAKDA	52	4	18.6453	167		NA	NA	54	54	0.8	1	0.6	0	0	1	2009	GOVERNMENT	CAT-11	2	8	0
7	6	22	2010	1	12	DJL	2	6	1	1	1	1	1			Cat IV	2	2	9	8	NEGATIVE						11	TAKDA	20	1		0		NA	NA	21	24	0.8	0.8	0	0	0	1	2008	GOVERNMENT	CAT-11	2	8	0
7	6	23	2010	1	21	DJL	2	6	1	1	1	1	2			Cat IV	2	2	1	8	NEGATIVE						11	KALINGPONG	49	4	14.7929	182		NA	NA	52	52	0.8	0.8	0.6	0	0	1	2008	GOVERNMENT	CAT-11	2	8	0
7	6	24	2010	0	17	DJL	2	5	1	1	1	1	1			Cat IV	2	2	9	8	NEGATIVE						4	KURSEONG	40	3	17.313	152		NA	NA	49	54	0.8	0.6	0.7	0	0	1	2008	GOVERNMENT	CAT-11	2	8	0
7	6	25	2010	0	36	DJL	2	6	1	1	1	1	1			Cat IV	2	9	3	3	NEGATIVE						4	DTC DJL	64	4	26.6389	155		NA	NA	76		0.8	0	0	0	0	1	2008	GOVERNMENT	CAT-11	2	8	0
7	6	26	2010	1	25	DJL	2	5	1	1	1	1	1			Cat IV	2	9	2	8	NEGATIVE						4	DTC DJL	50	4	15.9597	177		NA	NA	55	59	0.9	0	0	1	0	1	2009	GOVERNMENT	CAT-11	2	8	0
7	6	27	2010	1	18	JPG	2	6	1	1	1	1	1			Cat IV	2	2	2	8	NEGATIVE						4	ALIPURDUAR	39	3	15.4266	159		NA	NA	42	40	0.8	0	0	8	0	1		GOVERNMENT	CAT-11	2	8	0
7	6	28	2010	1	38	JPG	2	6	1	1	1	1	1			Cat IV	2	2	2	8	NEGATIVE						4	DTC JPG	40	3	13.6794	171		NA	NA		40	0	0	0	0	0	1		GOVERNMENT	CAT-11	2	8	0
7	6	29	2010	1	30	DJL	2	6	1	1	1	1	1			Cat IV	1	1	9	8	NEGATIVE						4	DTC DJL	45	4	12.5976	189		NA	NA	45	44	0.8	0.7	0.6	0	28	1	2003	PRIVATE	CAT-11	2	8	0
7	6	30	2010	1	20	JPG	2	6	1	1	1	1	1			Cat IV	2	2	2	8	NEGATIVE						4	MAL	45	4	14.3637	177		NA	NA	50	50	0	0.8	0	0	0	1	2008	GOVERNMENT	CAT-11	2	8	0
7	6	32	2010	1	36	JPG	2	6	1	1	1	1	1			Cat IV	2	2	2	8	NEGATIVE						4	KALCHINI	50	4	19.5313	160		NA	NA	51	50	0.7	0	0.8	4	0	1	2003	GOVERNMENT	CAT-11	2	8	0
7	6	33	2010	1	53	JPG	2	5	1	1	1	1	2			Cat IV	2	2	1	8	NEGATIVE						4	DTC JPG	47	4	14.0345	183	2010-07-10	EAR PROBLEM	NA	46	47	0.7	0	0	0	0	1	2004	GOVERNMENT	CAT-11	2	8	0
7	6	34	2010	1	50	JPG	2	6	1	1	1	1	1			Cat IV	2	2	2	8	NEGATIVE						4	DTC JPG	35	3		0		NA	NA			0	0	0	0	0	1		GOVERNMENT	CAT-11	2	8	0
7	6	35	2010	1	50	JPG	2	6	1	1	1	1	1			Cat IV	2	2	1	3	NEGATIVE						4	RAJGANJ	37	3	14.4531	160		NA	NA	36	42	0.8	0.8	0.8	0	0	1	2008	GOVERNMENT	CAT-11	2	8	0
7	6	36	2010	1	18	KBR	2	6	1	1	1	1	1			Cat IV	1	9	1	8	NEGATIVE						4	TUFANGANJ	50	4	15.9597	177		NA	NA	53	53	0.8	0	0	16	26	1	2008	GOVERNMENT	CAT-11	2	8	0
7	6	37	2010	1	20	KBR	2	6	1	1	1	1	1			Cat IV	2	9	9	8	NEGATIVE						4	DINHATA	41	3	12.2428	183		NA	NA		43	0.8	0	0	0	25	1	2007	GOVERNMENT	CAT-11	2	8	0
7	6	38	2010	0	30	KBR	2	6	1	1	1	1	1			Cat IV	2	1	9	3	NEGATIVE						4	MEKHLIGANJ	50	4	19.052	162		NA	NA	55	56	0.8	0	0	23	39	1	2007	GOVERNMENT	CAT-11	2	8	0
7	6	39	2010	1	28	DJL	2	6	1	1	1	1	1			Cat IV	2	2	9	8	NEGATIVE						4	SILIGURI	60	4		0		NA	NA	74		0.8	0	0	20	0	1	2006	GOVERNMENT	CAT-11	2	8	0
7	6	40	2010	1	28	DJL	2	6	1	1	1	1	1			Cat IV	2	2	9	8	NEGATIVE						4	SILIGURI	40	3	16.0231	158		NA	NA	44		0.8	0	0.8	25	0	1	2006	GOVERNMENT	CAT-11	2	8	0
7	6	41	2010	0	32	DJL	2	5	1	1	1	1	1			Cat IV	2	2	9	8	NEGATIVE						4	KURSEONG	42	3		0		NA	NA			0.8	0	0	0	0	1	2003	GOVERNMENT	CAT-11	2	8	0
7	6	42	2010	0	32	DJL	2	5	1	1	1	1	1			Cat IV	2	9	9	3	NEGATIVE						4	KHARIBARI	25	2	12.7551	140		NA	NA			0.8	0	0	0	0	1	2006	GOVERNMENT	CAT-11	2	8	0
7	6	43	2010	0	12	JPG	2	6	1	1	1	1	1			Cat IV	2	2	2	8	NEGATIVE						4	DHUPGURI	20	1	10.2041	140		NA	NA	26	26	0.8	0	0.9	0	0	1	2007	GOVERNMENT	CAT-11	2	8	0
7	6	44	2010	1	40	DJL	2	6	1	1	1	2	1			Cat IV	2	2	9	8	NEGATIVE						4	KALINGPONG	40	3	16.0231	158		NA	NA			0	0	0.7	0	0	1	2007	GOVERNMENT	CAT-11	2	8	0
7	6	45	2010	1	34	DJL	2	5	1	1	1	1	1			Cat IV	2	2	9	8	NEGATIVE						4	SILIGURI	42	3	18.1787	152		NA	NA			0	0	0	0	0	1	2008	GOVERNMENT	CAT-11	2	8	0
7	6	46	2010	0	40	JPG	2	6	1	1	1	2	2			Cat IV	2	2	9	8	NEGATIVE						4	RAJGANJ	40	3	16.2278	157		NA	NA	40	40	0.7	0.8	0.8	0	1	1	2008	GOVERNMENT	CAT-11	2	8	0
7	6	47	2010	1	31	JPG	2	6	1	1	1	2	1			Cat IV	2	2	9	8	NEGATIVE						4	RAJGANJ	42	3	11.7578	189		NA	NA	36	31	0.8	0.9	0.8	14	2	1	2008	GOVERNMENT	CAT-11	2	8	0
7	6	48	2010	1	39	KBR	2	6	1	1	1	1	1			Cat IV	2	2	9	8	NEGATIVE						4	DTC KBR	50	4	21.6413	152		NA	NA	49	50	0.9	0	0	45	68	1	2009	GOVERNMENT	CAT-11	2	8	0
7	6	49	2010	0	39	KBR	2	6	1	1	1	2	1			Cat IV	2	2	9	8	NEGATIVE						4	DTC KBR	45	4	19.2234	153		NA	NA			0.9	0.9	0	11	7	1	2008	GOVERNMENT	CAT-11	2	8	0
7	6	50	2010	1	26	KBR	2	5	1	1	1	1	1			Cat IV	2	2	9	8	NEGATIVE						4	DTC KBR	44	3	15.5896	168		NA	NA	50		0.8	0	0	30	28	1	2009	GOVERNMENT	CAT-11	2	8	0
7	6	51	2010	1	16	DJL	2	6	1	1	1	1	1			Cat IV	2	2	9	8	NEGATIVE						4	KOURSEONG	49	4	16.7573	171		NA	NA			0.8	0	0	0	0	1	2009	GOVERNMENT	CAT-11	2	8	0
7	6	52	2010	1	20	DJL	2	6	1	1	1	2	2			Cat IV	2	2	2	8	NEGATIVE						4	DTC DJL	38	3	15.2219	158		NA	NA	41	45	0.8	0	0	0	0	1	2008	GOVERNMENT	CAT-11	2	8	0
7	6	53	2010	0	50	DJL	2	6	1	1	1	1	2			Cat IV	9	2	9	8	NEGATIVE						4	TAKDA	40	3	19.5609	143		NA	NA			0.9	0	0	0	0	1	2008	GOVERNMENT	CAT-11	2	8	0
7	6	54	2010	1	33	DJL	2	6	1	1	2	2	1			Cat IV	2	2	3	3	NEGATIVE						4	KALINGPONG	41	3	15.8173	161		NA	NA			0.8	0	0	0	0	1	2004	GOVERNMENT	CAT-11	2	8	1
7	6	55	2010	1	32	DJL	2	6	1	1	1	1	2			Cat IV	2	2	9	8	NEGATIVE						4	KURSEONG	39	3	12.4485	177		NA	NA			0.8	0	0	0	0	1		GOVERNMENT	CAT-11	2	8	0
7	6	56	2010	1	19	DJL	2	5	1	1	1	2	1			Cat IV	2	1	2	8	NEGATIVE		8/20/2011				4	KURSEONG	46	4	17.1029	164	9/19/2010	PSYCOSIS PROBLEM	NA			0.9	0	0	0	0	1		GOVERNMENT	CAT-11	2	8	0
7	6	57	2010	1	18	JPG	2	6	1	1	1	1	1			Cat IV	2	2	2	8	NEGATIVE						4	BIRPARA	39	3	13.818	168		NA	NA	40	41	0.9	0.7	0.9	0	0	1		GOVERNMENT	CAT-11	2	8	0
7	6	58	2010	0	28	DJL	2	6	1	1	1	2	1			Cat IV	2	2	2	8	NEGATIVE						4	DTC DJL	40	3	17.313	152		NA	NA	43	49	0.8	0	0	0	0	1	2009	GOVERNMENT	CAT-11	2	8	0
7	6	59	2010	1	30	DJL	2	6	1	1	1	1	2			Cat IV	2	9	9	8	NEGATIVE						10	SILIGURI	36	3	12.4567	170		NA	NA			0.9	0	0	0	0	1		GOVERNMENT	CAT-11	2	8	0
7	6	60	2010	1	46	DJL	2	6	1	1	1	1	1			Cat IV	9	2	9	8	NEGATIVE						4	DTC DJL	46	4	17.9688	160	2010-11-09	TINNITUS	NA	48		0.9	0	0	0	0	1		GOVERNMENT	CAT-11	2	8	0
7	6	61	2010	1	30	DJL	2	5	1	1	1	2	2			Cat IV	2	2	2	8	NEGATIVE						4	KURSEONG	35	3	14.9515	153		NA	NA			0.8	0	0	0	0	1		GOVERNMENT	CAT-11	2	8	0
7	6	62	2010	1	26	JPG	2	6	1	1	1	1	1			Cat IV	2	2	2	8	NEGATIVE						4	APD	48	4	15.8541	174		NA	NA	54	51	0.9	0	1	0	0	1		GOVERNMENT	CAT-11	2	8	0
7	6	63	2010	1	28	JPG	2	6	1	1	2	1	1			Cat IV	2	2	2	8	NEGATIVE						4	RAJGANJ	39	3	13.4948	170		NA	NA	40	41	0	0	0	1	0	1	2009	GOVERNMENT	CAT-11	2	8	0
7	6	64	2010	1	18	JPG	2	6	1	1	1	1	2			Cat IV	2	2	2	8	NEGATIVE						4	APD	48	4	16.609	170		NA	NA	57	65	0.8	0	0	0	0	1		GOVERNMENT	CAT-11	2	8	0
7	6	65	2010	0	18	JPG	1	6	1	1	1	1	1			Cat IV	2	2	9	8	NEGATIVE						4	BIRPARA	32	2	12.8185	158		NA	NA	30	34	0.8	1	0	0	0	1	2008	GOVERNMENT	CAT-11	2	8	0
7	6	66	2010	0	13	JPG	2	6	1	1	1	1	1			Cat IV	2	2	2	8	NEGATIVE						4	APD	23	1	12.8091	134		NA	NA	24	25	0.8	0	0.6	0	0	1		GOVERNMENT	CAT-11	2	8	0
7	6	67	2010	1	67	JPG	2	6	1	1	1	1	2			Cat IV	2	2	2	8	NEGATIVE						4	KALCHINI	47	4	17.2635	165		NA	NA	48	50	0.9	0	1.2	1	0	1		GOVERNMENT	CAT-11	2	8	0
7	6	68	2010	0	32	DJL	2	6	1	1	2	1	2			Cat IV	2	2	2	8	NEGATIVE						4	TAKDA	38	3	19.3878	140		NA	NA			0.8	0	0.8	0	0	1	2008	GOVERNMENT	CAT-11	2	8	0
7	6	69	2010	1	35	DJL	2	6	1	1	1	2	1			Cat IV	2	9	2	8	NEGATIVE						4	KHARIBARI	50	4	15.9597	177		NA	NA			0.8	0	1.1	0	0	1	2008	GOVERNMENT	CAT-11	2	8	0
7	6	70	2010	0	36	JPG	2	6	1	1	1	1	1			Cat IV	2	2	9	8	NEGATIVE						4	NAGRAKATA	68	5	26.2336	161		NA	NA	65		0.9	0.8	0	0	0	1		GOVERNMENT	CAT-11	2	8	0
7	6	71	2010	1	50	JPG	2	6	1	1	1	1	1			Cat IV	2	1	2	8	NEGATIVE						4	ALIPURDUAR	35	3	13.5026	161	2010-04-02	EAR PROBLEM	NA	30	33	0.8	1.1	1.3	0	0	1		GOVERNMENT	CAT-11	2	8	0
7	6	72	2010	1	31	JPG	2	6	1	1	1	2	2			Cat IV	1	2	3	3	NEGATIVE						4	DTC JPG	30	2	11.5736	161		NA	NA	29		0.9	0	0.7	0	0	1	2007	GOVERNMENT	CAT-11	2	8	0
7	6	73	2010	1	51	JPG	2	6	1	1	1	1	1			Cat IV	1	1	2	8	NEGATIVE						4	MAL	51	4		0		NA	NA	50		0.7	0	0	0	0	1		GOVERNMENT	CAT-11	2	8	0
7	6	74	2010	1	35	JPG	2	6	1	1	1	2	2			Cat IV	2	2	9	8	NEGATIVE						4	MAL	33	2	12.731	161		NA	NA	39	36	0.8	0	0	3	0	1		GOVERNMENT	CAT-11	2	8	0
7	6	75	2010	1	36	DJL	2	5	1	1	2	1	2			Cat IV	2	2	2	8	NEGATIVE						11	KURSEONG	52	4	22.5069	152		NA	NA			0.8	0	0	0	0	1	2006	GOVERNMENT	CAT-11	2	8	0
7	6	76	2010	1	27	DJL	2	6	1	1	2	2	2			Cat IV	2	1	2	8	NEGATIVE						4	KURSEONG	40	3		0		NA	NA			0.9	0	0	0	0	1	2008	GOVERNMENT	CAT-11	2	8	0
7	6	77	2010	1	26	DJL	2	6	1	1	2	2	2			Cat IV	1	1	1	8	NEGATIVE						4	KURSEONG	46	4		0		NA	NA			0.8	0	0	0	0	1	2006	GOVERNMENT	CAT-11	2	8	0
7	6	78	2010	0	23	DJL	2	5	1	1	1	1	1			Cat IV	2	2	9	8	NEGATIVE						4	KALINGPONG	64	4	25.6369	158		NA	NA			0.7	0	0	0	0	1	2006	GOVERNMENT	CAT-11	2	8	0
7	6	79	2010	1	22	JPG	2	6	1	1	1	1	1			Cat IV	2	9	9	8	NEGATIVE						4	ALIPURDUAR	66	5	21.0667	177		NA	NA	61		0.8	0	1.3	0	0	1	2008	GOVERNMENT	CAT-11	2	8	0
7	6	80	2010	1	21	JPG	2	6	1	1	1	2	2			Cat IV	2	9	9	8	NEGATIVE						4	DHUPGURI	46	4	17.7462	161		NA	NA	45	42	0.8	0	0	0	0	1	2009	GOVERNMENT	CAT-11	2	8	0
7	6	81	2010	1	22	JPG	2	6	1	1	1	1	2			Cat IV	3	3	3	3	NEGATIVE						4	DHUPGURI	41	3	16.4237	158		NA	NA			0.8	0	0	0	0	1	2009	GOVERNMENT	CAT-11	2	8	0
7	6	82	2010	1	26	JPG	2	6	1	1	1	2	1			Cat IV	2	9	9	8	NEGATIVE						4	DHUPGURI	55	4	20.4491	164		NA	NA	55	50	0.9	0	0	0	0	1	1999	GOVERNMENT	CAT-11	2	8	0
7	6	83	2010	0	26	JPG	2	6	1	1	2	1	1			Cat IV	2	9	3	3	NEGATIVE						4	DHUPGURI	38	3	14.6599	161		NA	NA	35		0.8	0.7	0	0	0	1	2009	GOVERNMENT	CAT-11	2	8	0
7	6	84	2010	0	32	JPG	2	6	1	1	1	2	2			Cat IV	2	9	9	8	NEGATIVE						4	DHUPGURI	40	3	21.3117	137		NA	NA	40	41	0.7	0	0	0	0	1		GOVERNMENT	CAT-11	2	8	0
7	6	85	2010	0	27	JPG	2	9	1	1	1	2	2			Cat IV	1	9	9	8	NEGATIVE						4	MAYNAGURI	44	3	19.0443	152		NA	NA	50	55	0.7	0.8	0.9	0	0	1	2004	GOVERNMENT	CAT-11	2	8	0
7	6	86	2010	1	29	KBR	2	6	1	1	1	2	2			Cat IV	9	2	9	8	NEGATIVE						4	DTC KBR	42	3	13.4061	177		NA	NA			0.9	0	0	0	0	1	2009	GOVERNMENT	CAT-11	2	8	0
7	6	87	2010	1	56	KBR	2	6	1	1	1	2	1			Cat IV	9	2	9	8	NEGATIVE						4	TUFANGANJ	40	3	14.3426	167		NA	NA	40		0.8	0.9	0	29	0	1	2002	GOVERNMENT	CAT-11	2	8	0
7	6	88	2010	0	22	KBR	2	6	1	1	1	1	1			Cat IV	2	2	3	3	NEGATIVE						4	MATHABHANGA	35	3	15.1489	152		NA	NA	36		0.7	0	1.1	0	0	1	2009	GOVERNMENT	CAT-11	2	8	0
7	6	89	2010	1	35	KBR	2	7	1	1	1	1	2			Cat IV	2	3	3	3	NEGATIVE						4	JDH	32	2	12.8185	158		NA	NA			0.7	0	0	0	0	1	2007	GOVERNMENT	CAT-11	2	8	0
7	6	1	2011	0	35	DJL	2	6	1	1	1	1	1			Cat IV	1	9	9	8	NEGATIVE						4	KURSEONG	32	2	17.0494	137		NA	NA			0.9	0	0	0	0	1	1994	GOVERNMENT	CAT-11	2	8	0
7	6	2	2011	1	45	DJL	2	9	1	1	1	2	1			Cat IV	1	9	9	8	NEGATIVE						2	KHARIBARI	40	3	25.6	125		NA	NA			0.8	0	0	0	0	1		GOVERNMENT	CAT-11	2	8	0
7	6	3	2011	1	23	DJL	2	5	1	1	1	2	2			Cat IV	2	9	2	3	NEGATIVE						4	DTC DJL	46	4	16.494	167		NA	NA			0.8	0	0	0	0	1	2008	GOVERNMENT	CAT-11	2	8	0
7	6	4	2011	1	35	DJL	2	5	1	1	1	1	1			Cat IV	1	9	9	8	NEGATIVE						4	DTC DJL	56	4	22.4323	158		NA	NA			0.9	0	0	0	0	1	2008	GOVERNMENT	CAT-11	2	8	0
7	6	5	2011	1	18	DJL	2	6	1	1	2	1	1			Cat IV	2	2	9	8	NEGATIVE						4	SILIGURI	51	4	18.2868	167		NA	NA			0.8	0	0	0	0	1	2010	GOVERNMENT	CAT-11	2	8	0
7	6	6	2011	1	37	DJL	2	6	1	1	1	2	1			Cat IV	9	9	9	5	NEGATIVE						4	DTC DJL	46	4	17.7462	161		NA	NA			0	0	0	0	0	1		GOVERNMENT	CAT-11	2	8	0
7	6	7	2011	0	26	DJL	2	4	1	1	1	2	2			Cat IV	2	9	9	8	NEGATIVE						11	TAKDA	47	4	30.08	125		NA	NA			0.8	0	0	0	0	1	2009	GOVERNMENT	CAT-11	2	8	0
7	6	8	2011	1	50	KBR	2	6	1	1	2	2	1			Cat IV	2	2	9	8	NEGATIVE						4	TUFANGANJ	58	4	17.51	182		NA	NA			0.9	0	0.7	0	0	1		GOVERNMENT	CAT-11	2	8	0
7	6	9	2011	1	33	KBR	2	6	1	1	1	1	1			Cat IV	2	2	9	8	NEGATIVE						4	DTC KBR	50	4	15.0948	182		NA	NA			0.8	0	1.3	25	0	1		GOVERNMENT	CAT-11	2	8	0
7	6	10	2011	0	54	DJL	2	5	1	1	1	2	1			Cat IV	9	3	3	3	NEGATIVE						4	DTC DJL	49	4	22.9874	146		NA	NA			0.8	0	0	0	0	1	2007	GOVERNMENT	CAT-11	2	8	1
6	7	1	2009	1	40	DSA	8	6	1	1	1	1	1			Cat IV	1	1	3	3	NEGATIVE						1	Mahwa	31	2								1	1.4		3	0	2	2008	GOVERNMENT	2nd Cat.	2	6	0
6	7	2	2009	1	40	BLW	2	6	1	1	1	1	1			Cat IV	1	1	1	6	NEGATIVE						1	Mandalgarh	70	5						71	71	0.9	1.1	1.1	0	0	1	2008	GOVERNMENT	1st Cat.	2	6	0
6	7	3	2009	1	50	BLW	8	4	1	1	1	2	1			Cat IV	2	2	2	1	NEGATIVE						1	Mandalgarh	50	4						50	52	0.9	1.1		2	0	4	2007	GOVERNMENT	2nd Cat.	2	6	0
6	7	4	2009	1	40	JPR	2	6	1	1	1	2	1			Cat IV	2	2	9	1	NEGATIVE						1	DTC-I Jaipur	50	4	18.3655	165				55	60	0.7	1.5	1.3	0	0	3	2008	GOVERNMENT	2nd Cat.	2	7	0
6	7	5	2009	0	24	JPR	2	4	1	1	1	2	1			Cat IV	2	2	2	1	NEGATIVE						1	Amer	40	3			5/23/2009	Due to Kanamycin		41	42	0.8	0.7	0.7	0	0	2	2008	GOVERNMENT	2nd Cat.	2	6	0
6	7	6	2009	1	60	TNK	8	7	1	1	1	2	1			Cat IV	2	2	9	1	NEGATIVE						1	Tonk	41	3						56	60	0.9	1.5	0.7	0	0	2	2009	GOVERNMENT	2nd Cat.	2	8	0
6	7	7	2009	1	40	TNK	8	5	1	1	1	2	1			Cat IV	2	2	9	1	NEGATIVE						1	Tonk	43	3						44		0.9	0.9	0.5	0	0	4	2007	GOVERNMENT	2nd Cat.	2		0
6	7	8	2009	1	48	ALW	2	5	1	1	1	2	1			Cat IV	2	2	9	1	NEGATIVE						1	Kishangarhwas	53	4						54	55	0.7	1.1	1	0	0	3	2008	GOVERNMENT	3rd cat.	2	6	0
6	7	9	2009	1	40	BLW	2	7	1	1	1	1	1			Cat IV	2	2	9	1	NEGATIVE						1	Bhilwara	45	4						50		0.7	1.2	1.2	0	0				UNAVAIL	2		0
6	7	10	2009	1	40	DSA	2	6	1	1	1	2	1			Cat IV	2	2	9	1	NEGATIVE						1	Dausa	40	3						42	48	0.7	1.1	1	0	11	2	2008	GOVERNMENT	2nd Cat.	2	5	1
6	7	11	2009	1	60	DSA	2	6	1	1	1	2	1			Cat IV	2	2	9	3	NEGATIVE						1	Mahwa	42	3						45	45	0.8	1	0.9	0	4	2	2008	GOVERNMENT	2nd Cat.	2	6	0
6	7	12	2009	0	40	TNK	2	6	1	1	1	1	1			Cat IV	2	9	9	1	NEGATIVE						1	Malpura	40	3						43	44	0.6		0.7	0	0	2	2009	GOVERNMENT	2nd Cat.	2	1	0
6	7	13	2009	1	21	SKR	2	6	1	1	1	1	2			Cat IV	2	4	4	4	NEGATIVE						1	Sikar	42	3						48		0.9	1		0	0	4	2006	GOVERNMENT	2nd Cat.	2	8	0
6	7	14	2009	1	30	JPR	1	6	1	1	1	2	1			Cat IV	2	2	9	6	NEGATIVE						9	Sanganer	50	4						54	55	0.7	0.8	0.7	0	0	2	2009	GOVERNMENT	2nd Cat.	2	2	0
6	7	15	2009	1	45	TNK	2	5	1	1	1	2	1			Cat IV	2	2	9	1	NEGATIVE						1	Tonk	43	3						44	46	0.8	0.6		0	0	3	2006	GOVERNMENT	2nd Cat.	2	8	0
6	7	16	2009	1	50	ALW	2	5	1	1	1	2	1			Cat IV	2	2	2	1	NEGATIVE						1	Behror	49	4						51	52	0.9	1	0.9	0	5	3	2008	GOVERNMENT	2nd Cat.	2	6	0
6	7	17	2009	1	52	AJM	2	6	1	1	1	2	1			Cat IV	2	2	9	3	NEGATIVE						1	Arain	59	4						61		0.7		0.7	1	0	2	2008	GOVERNMENT	2nd Cat.	2	4	0
6	7	18	2009	1	32	AlW	2	6	1	1	1	2	2			Cat IV	2	2	2	1	NEGATIVE						1	Thanagazhi	56	4						58	56	0.8	0.8	1	0	37	3	2008	GOVERNMENT	2nd Cat.	2	6	0
6	7	19	2009	1	40	JPC	2	5	1	1	1	2	1			Cat IV	3	3	3	3	NEGATIVE						1	Dudu	34	2								0.7			0	0	3	2007	GOVERNMENT	2nd Cat.	2	5	0
6	7	20	2009	1	38	JPR	1	6	1	1	1	1	1			Cat IV	2	9	4	4	NEGATIVE						1	Purani Basti	55	4						55	56	0.7	0.9		12	0	1	2008	GOVERNMENT	1st Cat.	2	6	0
6	7	21	2009	1	45	SKR	2	6	1	1	1	2	1			Cat IV	2	2	9	1	NEGATIVE						9	Sikar	55	4						61	60	0.9	0.8	1.1	7	0	3	2007	GOVERNMENT	2nd Cat.	2	6	0
6	7	22	2009	1	65	JPC	2	6	1	1	1	2	2			Cat IV	2	9	2	1	NEGATIVE						1	Sanganer	42	3						46	42	0.7	0.8	0.8	0	0	2	2009	GOVERNMENT	2nd Cat.	2	8	0
6	7	23	2009	1	30	ALW	2	6	1	1	1	1	1			Cat IV	2	9	2	1	NEGATIVE						1	Alwar	47	4			11/15/2011	Due to Kanamycin		50		1		1.1	0	0	2	2008	GOVERNMENT	2nd Cat.	2	6	0
6	7	24	2009	0	24	JPR	2	6	1	1	1	2	2			Cat IV	2	2	2	1	NEGATIVE						9	Amer	35	3						38	38	1.1	0.6		0	0	2	2009	GOVERNMENT	2nd Cat.	2	8	0
6	7	25	2009	0	15	JPC	2	5	1	1	1	2	1			Cat IV	2	9	2	1	NEGATIVE						1	Sanganer	44	3						44	43	0.7	0.7	0.7	0	0	2	2008	GOVERNMENT	2nd Cat.	2	7	0
6	7	26	2009	0	23	JPR	2	6	1	1	1	2	1			Cat IV	4	4	4	4	NEGATIVE						1	Amer	35	3						36	36	0.7	0.8		0	0	3	2007	GOVERNMENT	2nd Cat.	2	8	0
6	7	27	2009	0	10	JPR	2	6	1	1	1	2	1			Cat IV	2	9	2	1	NEGATIVE						1	Sirah dyodi	23	1						24	26	0.6	0.7	0.7	0	0				UNAVAIL	2		0
6	7	28	2009	0	18	ALW	2	6	1	1	1	1	1			Cat IV	1	9	1	2	NEGATIVE						1	Thanagazhi	40	3						40	40	0.6	0.8	0.6	0	0	4	2007	GOVERNMENT	2nd Cat.	2	4	0
6	7	29	2009	0	18	TNK	2	6	1	1	1	1	1			Cat IV	2	9	9	1	NEGATIVE						1	Tonk	46	4						46	46	0.8	0.5	0.9	0	0	3	2008	GOVERNMENT	2nd Cat.	2	2	0
6	7	30	2009	1	40	TNK	2	6	1	1	1	1	2			Cat IV	2	9	9	1	NEGATIVE						1	Tonk	35	3						40	41	0.9	0.6	0.6	0	0	3	2008	GOVERNMENT	2nd Cat.	2	8	0
6	7	31	2009	1	45	TNK	2	5	1	1	1	1	1			Cat IV	2	2	3	3	NEGATIVE						1	Deoli	35	3						36	38	1.2			0	0	3	2008	GOVERNMENT	2nd Cat.	2	9	0
6	7	32	2009	1	32	ALW	2	6	1	1	1	1	1			Cat IV	2	9	2	1	NEGATIVE						1	Kishangarhwas	60	4						70	68	0.7	1		0	22	2	2009	GOVERNMENT	2nd Cat.	2	4	0
6	7	33	2009	1	41	ALW	2	6	1	1	1	2	2			Cat IV	1	2	4	4	NEGATIVE						1	Govindgarh	43	3						44	44	0.7	1.1		75	0	2	2009	GOVERNMENT	2nd Cat.	2	2	0
6	7	34	2009	1	32	JPR	2	6	1	1	1	2	1			Cat IV	2	2	2	1	NEGATIVE						1	Shahpura	57	4						64	65	0.9	1.3	0.7	0	0	2	2009	GOVERNMENT	2nd Cat.	2	3	0
6	7	35	2009	1	25	TNK	2	6	1	1	1	1	1			Cat IV	9	9	9	1	NEGATIVE						1	Tonk	41	3						43	44	0.8	0.8		0	0	4	2007	GOVERNMENT	2nd Cat.	2	8	0
6	7	36	2009	1	22	JPR	2	6	1	1	1	1	1			Cat IV	9	9	2	6	NEGATIVE						1	Amer	41	3						46	44	0.6	0.7		0	0	2	2007	GOVERNMENT	2nd Cat.	2	8	0
6	7	37	2009	1	45	JPC	2	6	1	1	1	2	1			Cat IV	4	4	4	4	NEGATIVE						1	Sirohi	37	3						44	44	0.8	0.8	0.9	4	0	2	2009	GOVERNMENT	2nd Cat.	2	8	0
6	7	38	2009	1	30	SKR	2	6	1	1	1	1	1			Cat IV	9	2	9	1	NEGATIVE						1	Sikar	52	4						48	50	0.9	1	1	6	60	2	2008	GOVERNMENT	2nd Cat.	2	8	0
6	7	39	2009	1	58	ALW	2	6	1	1	1	2	1			Cat IV	2	2	3	3	NEGATIVE						1	Govindgarh	50	4								0.8	0.9	1	0	20	2	2009	GOVERNMENT	2nd Cat.	2	2	0
6	7	40	2009	0	40	TNK	2	6	1	1	1	1	1			Cat IV	9	9	9	1	NEGATIVE						1	Deoli	42	3						41	44	0.7	0.5	0.4	0	41	2	2008	GOVERNMENT	2nd Cat.	2	8	0
6	7	41	2009	1	40	AJM	2	6	1	1	1	1	2			Cat IV	2	9	9	6	NEGATIVE						1	Pushkar	42	3						45	43	0.9		0.7	0	0	3	2008	GOVERNMENT	2nd Cat.	2	6	0
6	7	42	2009	1	38	JPR	2	6	1	1	1	2	2			Cat IV	2	9	9	1	NEGATIVE						1	Amer	46	4						49	54	0.7	0.8	1.1	0	0	2	2009	GOVERNMENT	2nd Cat.	2	3	0
6	7	43	2009	1	70	JPR	2	6	1	1	1	1	1			Cat IV	3	3	3	3	NEGATIVE						1	Sirah dyodi	32	2								0.6			0	0	2	2008	GOVERNMENT	2nd Cat.	2	4	0
6	7	44	2009	0	35	ALW	2	6	1	1	1	2	1			Cat IV	1	2	9	1	NEGATIVE						1	Kishangarhwas	43	3						44	46	0.7	1.4	1.3	0	0	2	2009	GOVERNMENT	2nd Cat.	2	6	0
6	7	45	2009	1	30	JPR	2	6	1	1	1	1	1			Cat IV	2	9	9	1	NEGATIVE						4	Kanwatiya	45	4						44	42	0.7	1	0.6	0	0	2	2008	GOVERNMENT	2nd Cat.	2	6	0
6	7	46	2009	0	24	JPR	2	6	1	1	1	1	1			Cat IV	2	9	2	1	NEGATIVE						1	Sirah dyodi	28	2						28	30	0.6	0.6		0	0	2	2009	GOVERNMENT	2nd Cat.	2	6	1
6	7	47	2009	0	60	JPR	1	6	1	1	1	2	2			Cat IV	2	2	2	1	NEGATIVE						1	Kotputli	53	4						54	55	1.1	0.7		0	0	1	2008	GOVERNMENT	1st	2	6	0
6	7	48	2009	1	45	ALW	2	6	1	1	1	2	1			Cat IV	2	9	4	4	NEGATIVE						1	Rajgarh	44	3						43		0.9	0.8	0.1	16	0				UNAVAIL	2		0
6	7	49	2009	1	40	BLW	2	6	1	1	1	1	1			Cat IV	9	1	3	3	NEGATIVE						1	Bhilwara	39	3						39	39	0.7	1		3	0	4	2008	GOVERNMENT	2nd Cat.	2	6	0
6	7	50	2009	1	35	DSA	1	6	1	1	1	1	1			Cat IV	9	2	2	1	NEGATIVE						1	Dausa	43	3						43	43	0.6	1.2	0.8	0	6	2	2009	GOVERNMENT	2nd Cat.	2	2	0
6	7	51	2009	1	25	JPC	1	9	1	1	1	2	1			Cat IV	2	2	4	4	NEGATIVE						1	Vaishali Nagar	54	4						55	55	0.7	0.7	0.7	0	0	4	2007	GOVERNMENT	2nd Cat.	2	6	0
6	7	52	2009	1	38	DSA	2	6	1	1	1	2	1			Cat IV	4	4	4	4	NEGATIVE						1	Dausa	57	4						57	58	0.8	0.7		0	0				UNAVAIL	2		1
6	7	53	2009	1	55	TNK	2	5	1	1	1	2	2			Cat IV	9	2	9	1	NEGATIVE						1	Malpura	40	3						37	41	0.2			0	0	4	2007	GOVERNMENT	2nd Cat.	2	5	0
6	7	54	2009	1	55	ALW	2	6	1	1	1	1	1			Cat IV	9	1	2	4	NEGATIVE						1	Govindgarh	40	3						42	43	0.9	0.8	1.2	0	12	2	2008	GOVERNMENT	3rd cat.	2	2	0
6	7	55	2009	1	60	ALW	2	6	1	1	1	1	1			Cat IV	4	4	4	4	NEGATIVE						1	Kishangarhwas	45	4								0.9			0	0	2	2008	PRIVATE	1st Cat.	2	6	0
6	7	56	2009	0	20	JPR	1	9	1	1	1	2	2			Cat IV	4	4	4	4	NEGATIVE						1	Kotputli	31	2								0.5			0	0	2	2009	GOVERNMENT	2nd Cat.	2	3	0
6	7	57	2009	1	26	DSA	2	6	1	1	1	1	1			Cat IV	9	9	9	9	NEGATIVE						4	Bandikui	35	3						37	36	1	1		1	70	4	2007	GOVERNMENT	2nd Cat.	2	3	0
6	7	58	2009	1	35	JPC	2	5	1	1	1	2	1			Cat IV	9	9	9	3	NEGATIVE						1	Sanganer	44	3						45	46	0.6	0.7	0.7	0	0	3	2008	GOVERNMENT	2nd Cat.	2	6	0
6	7	59	2009	1	12	JPR	2	5	1	1	1	2	1			Cat IV	9	2	9	1	NEGATIVE						1	Sirah dyodi	32	2						43	42	0.6	0.6		8	0	2	2009	GOVERNMENT	2nd Cat.	2	8	0
6	7	60	2009	1	41	AJM	2	6	1	1	1	1	1			Cat IV	2	2	2	4	NEGATIVE						1	Ajmer	56	4						61	61	0.9	0.6	0.9	19	51	4	2008	GOVERNMENT	2nd Cat.	2	6	0
6	7	61	2009	1	20	JPC	2	6	1	1	1	2	1			Cat IV	2	2	2	1	NEGATIVE						1	Vaishali Nagar	48	4			9/27/2009	Due to Ethionamide		50	49	0.9	0.8		0	0	3	2008	GOVERNMENT	2nd Cat.	2	6	0
6	7	62	2009	0	13	ALW	1	6	1	1	1	1	2			Cat IV	9	2	4	4	NEGATIVE						1	Behror	36	3						36		0.6			0	0	2	2009	GOVERNMENT	2nd Cat.	2	3	0
6	7	63	2009	0	23	JPR	2	6	1	1	1	2	2			Cat IV	9	2	2	1	NEGATIVE						7	Sirah dyodi	42	3						43	44	0.7	0.8	0.7	0	0				UNAVAIL	2		0
6	7	64	2009	0	42	JPR	2	6	1	1	1	2	2			Cat IV	2	9	9	1	NEGATIVE						10	Purani Basti	40	3						41	42	1	0.8		1	0	2	2009	GOVERNMENT	2nd Cat.	2	6	0
6	7	65	2009	0	25	BLW	1	6	1	1	1	1	1			Cat IV	3	3	3	3	NEGATIVE						1	Mandalgarh	35	3								0.6			0	0	2	2009	GOVERNMENT	2nd Cat.	2	5	0
6	7	66	2009	1	25	BLW	2	6	1	1	1	2	1			Cat IV	2	2	4	4	NEGATIVE						1	Bijoliya	46	4								0.7	0.7		0	0	2	2008	GOVERNMENT	2nd Cat.	2	6	0
6	7	67	2009	0	18	JPR	2	5	1	1	1	1	1			Cat IV	2	2	9	1	NEGATIVE						1	Purani Basti	30	2						34	42	0.7	0.6		0	0				UNAVAIL	2		0
6	7	68	2009	1	45	BLW	2	6	1	1	1	2	2			Cat IV	3	3	3	3	NEGATIVE						1	Bhilwara	39	3								0.8			0	0	2	2009	GOVERNMENT	2nd Cat.	2	8	0
6	7	69	2009	1	42	JPC	2	5	1	1	1	1	2			Cat IV	9	9	3	3	NEGATIVE						1	Vaishali Nagar	37	3						38		0.9	0.7	0.7	0	0	4	2007	GOVERNMENT	2nd Cat.	2	4	1
6	7	70	2009	1	27	ALW	2	5	1	1	1	2	2			Cat IV	2	2	2	2	NEGATIVE						1	Alwar	52	4						53	51	0.7	1.4	1.1	0	6	1	2008	GOVERNMENT	2nd Cat.	2	8	0
6	7	71	2009	0	20	ALW	2	6	1	1	1	2	1			Cat IV	9	2	2	1	NEGATIVE						1	Alwar	35	3						35	36	0.7	0.8		0	25	3	2008	GOVERNMENT	2nd Cat.	2	6	0
6	7	72	2009	0	23	ALW	2	5	1	1	1	2	1			Cat IV	9	9	9	1	NEGATIVE						1	Kishangarhwas	30	2						33	33	0.6	1.3		0	0	3	2008	GOVERNMENT	2nd Cat.	2	6	0
6	7	73	2009	1	35	TNK	2	5	1	1	1	2	2			Cat IV	2	9	1	1	NEGATIVE						1	Tonk	35	3						39	40	0.8			1	0	4	2007	GOVERNMENT	2nd Cat.	2	8	0
6	7	74	2009	1	45	AJM	1	6	1	1	1	1	2			Cat IV	2	2	2	3	NEGATIVE						1	Arain	33	2						48	42	0.7	0.6		0	0				UNAVAIL	2		0
6	7	75	2009	0	22	BLW	2	6	1	1	1	1	1			Cat IV	9	2	2	1	NEGATIVE						1	Bhilwara	38	3						38	44	0.7	1	1	1	1	2	2009	GOVERNMENT	2nd Cat.	2	8	0
6	7	76	2009	0	30	BLW	3	6	1	1	1	1	1			Cat IV	9	2	9	1	NEGATIVE						1	Mandalgarh	39	3						41		0.7	1.2	0.8	1	1	2	2009	GOVERNMENT	2nd Cat.	2	2	0
6	7	77	2009	0	22	JPC	1	7	1	1	1	1	1			Cat IV	9	2	9	1	NEGATIVE						1	Dudu	37	3			10/28/2009	Due to Kanamycin		40	35	0.7	0.7	0.7	0	0				UNAVAIL	2		0
6	7	78	2009	1	27	JPR	1	4	1	1	1	2	2			Cat IV	5	5	5	5	NEGATIVE						9	Purani Basti	59	4			11/22/2009	Due to Kanamycin				0.6	0.7		3	0				UNAVAIL	2		0
6	7	79	2009	0	45	SKR	2	4	1	1	1	1	2			Cat IV	2	2	2	1	NEGATIVE						1	TBC sikar	43	3						43	41	0.8	0.7	0.7	0	0	2	2009	GOVERNMENT	2nd Cat.	2	6	0
6	7	80	2009	1	42	JPR	2	7	1	1	1	1	2			Cat IV	2	2	9	1	NEGATIVE						1	Shahpura	48	4						46	44	1	1.3		0	0	1	2009	GOVERNMENT	2nd Cat.	2	3	0
6	7	81	2009	1	40	JPR	2	6	1	1	1	2	1			Cat IV	2	9	1	1	NEGATIVE						1	Amer	45	4						48	48		0.6		0	70	2	2008	GOVERNMENT	2nd Cat.	2	8	0
6	7	82	2009	1	40	JPR	2	6	1	1	1	1	1			Cat IV	2	2	9	1	NEGATIVE						1	Sirehdyodhi	49	4			9/20/2011	Due to Ethionamide		50	50	0.9	0.8	0.9	0	0	2	2009	GOVERNMENT	2nd Cat.	2	6	0
6	7	83	2009	1	21	AlW	2	6	1	1	2	1	1			Cat IV	2	2	9	4	NEGATIVE						1	Behror	61	4						62	62	0.6	0.8	1.3	0	0	2	2009	GOVERNMENT	2nd Cat.	2	2	1
6	7	84	2009	1	40	DSA	2	4	1	1	1	1	1			Cat IV	2	1	3	3	NEGATIVE						1	Mahwa	39	3						42		0.6	1		5	2				UNAVAIL	2		0
6	7	85	2009	0	30	JPR	2	5	1	1	1	2	1			Cat IV	2	2	9	1	NEGATIVE						1	Purani Basti	43	3						45	45	0.7	0.7	0.7	0	0	2	2009	GOVERNMENT	2nd Cat.	2	6	0
6	7	86	2009	0	45	JPR	1	5	1	1	1	2	2			Cat IV	9	1	9	6	NEGATIVE						1	Purani Basti	31	2						33	33	0.6	0.6	0.8	0	0				UNAVAIL	2		0
6	7	87	2009	0	22	ALW	2	5	1	1	1	2	2			Cat IV	2	2	9	2	NEGATIVE						9	Behror	31	2						48	49	1		0.7	0	0	2	2008	GOVERNMENT	2nd Cat.	2	8	0
6	7	88	2009	1	32	BLW	2	5	1	1	1	2	2			Cat IV	2	2	3	3	NEGATIVE						1	Shahpura	30	2						35		0.9	1.1		2	0	2	2009	GOVERNMENT	2nd Cat.	2	1	1
6	7	89	2009	0	18	SKR	2	7	1	1	1	1	1			Cat IV	9	9	9	1	NEGATIVE						9	Sikar	37	3						34	41	0.8	0.8	0.7	0	7				UNAVAIL	2		0
6	7	90	2009	1	35	DSA	2	6	1	1	1	1	1			Cat IV	9	9	4	4	NEGATIVE						3	Bandikui	37	3						44		0.7	1	1.5	30	0	4	2008	GOVERNMENT	2nd Cat.	2	6	0
6	7	91	2009	0	40	ALW	2	5	1	1	1	1	1			Cat IV	2	9	4	4	NEGATIVE						1	Alwar	40	3						43	44	0.6	0.5	0.5	0	0	2	2005	GOVERNMENT	2nd Cat.	2	6	0
6	7	92	2009	1	45	BLW	2	5	1	1	1	1	1			Cat IV	1	1	3	3	NEGATIVE						1	Mandalgarh	41	3						42		0.7	1		4	0	4	2006	GOVERNMENT	2nd Cat.	2	6	0
6	7	93	2009	1	35	DSA	2	7	1	1	1	2	2			Cat IV	9	9	2	1	NEGATIVE						1	Bandikui	40	3						48	49	0.7	0.9	0.8	3	22				UNAVAIL	2		0
6	7	94	2009	1	30	SKR	1	4	1	1	1	2	1			Cat IV	9	2	9	1	NEGATIVE						1	TBC Sikar	49	4						50	50	0.7	1	1.3	0	3				UNAVAIL	2		0
6	7	95	2009	1	40	BLW	2	6	1	1	1	1	2			Cat IV	9	1	4	4	NEGATIVE						1	Mandalgarh	39	3						40		0.8	1.1		0	0	4	2007	GOVERNMENT	2nd Cat.	2	6	1
6	7	96	2009	1	28	JPR	2	6	1	1	1	1	1			Cat IV	2	2	9	1	NEGATIVE						1	Purani Basti	53	4			3/27/2010	due to kanamycin		52	53	0.6			0	0	2	2009	GOVERNMENT	2nd Cat.	2	4	0
6	7	97	2009	1	35	BLW	2	6	1	1	1	1	1			Cat IV	9	9	4	4	NEGATIVE						1	Bhilwara	47	4								0.7	1.2		11	0	2	2009	GOVERNMENT	2nd Cat.	2	6	0
6	7	98	2009	0	50	BLW	2	6	1	1	1	1	1			Cat IV	2	9	3	3	NEGATIVE						1	Bhilwara	36	3						36		0.8	0.9		0	0	3	2009	GOVERNMENT	2nd Cat.	2	8	0
6	7	99	2009	1	30	BLW	2	6	1	1	1	2	2			Cat IV	2	2	2	1	NEGATIVE						1	Gangapur	36	3						41	41	0.6	1.4	1	0	0	4	2007	GOVERNMENT	2nd Cat.	2	6	0
6	7	100	2009	1	30	JPC	2	6	1	1	1	1	1			Cat IV	1	2	9	8	NEGATIVE						1	Bani Park	40	3						41	40	0.7	0.7		0	0	2	2008	GOVERNMENT	2nd Cat.	2	8	0
6	7	101	2009	0	13	JPR	2	6	1	1	1	2	2			Cat IV	2	2	2	2	NEGATIVE						9	Sirehdyodhi	35	3						35	36		0.7		0	0	2	2009	GOVERNMENT	2nd Cat.	2	6	0
6	7	102	2009	1	45	ALW	2	6	1	1	1	2	2			Cat IV	2	4	4	4	NEGATIVE						9	Alwar	52	4						52		0.6	1.3		0	0	2	2009	GOVERNMENT	3rd cat.	2	2	0
6	7	1	2010	0	15	SKR	2	6	1	1	1	1	1			Cat IV	2	9	2	8	NEGATIVE						9	Sikar	39	3						40	43	0.6	0.8	0.8	5	0	4	2007	GOVERNMENT	2nd Cat.	2	6	0
6	7	2	2010	1	27	JPR	2	5	1	1	1	2	2			Cat IV	2	3	3	3	NEGATIVE						1	Amer	40	3								0.6			0	0	2	2009	GOVERNMENT	2nd Cat.	2	8	0
6	7	3	2010	0	18	ALW	2	6	1	1	1	2	1			Cat IV	2	9	9	2	NEGATIVE						1	Alwar	42	3			1/17/2011	due to kanamycin		43	42	0.7	0.5	0.5	0	0	2	2009	GOVERNMENT	2nd Cat.	2	8	0
6	7	4	2010	1	38	JPR	2	5	1	1	1	2	1			Cat IV	2	1	2	8	NEGATIVE						3	Amer	50	4						54	55	0.7	0.7		0	0				UNAVAIL	2		0
6	7	5	2010	1	62	JPC	2	6	1	1	1	1	1			Cat IV	2	2	2	1	NEGATIVE						1	Bani Park	42	3						42	44	0.6	0.7		0	0	3	2008	GOVERNMENT	2nd Cat.	2	3	0
6	7	6	2010	0	35	SKR	2	5	1	1	1	2	1			Cat IV	2	9	9	8	NEGATIVE						1	Sikar	44	3			5/22/2010	Due to Kanamycin		44	45	0.7	0.7	0.7	0	0	2	2009	GOVERNMENT	2nd Cat.	2	6	0
6	7	7	2010	1	39	JPC	2	6	1	1	1	2	2			Cat IV	2	2	2	1	NEGATIVE						1	Kanwatiya	60	4						60	62	0.7	0.6	1.2	0	8	2	2009	GOVERNMENT	2nd Cat.	2	5	0
6	7	8	2010	1	40	AJM	2	7	1	1	1	1	1			Cat IV	2	2	1	3	NEGATIVE						1	Beawar	35	3						36	34	0.7	0.8	0.8	0	0	3	2008	GOVERNMENT	2nd Cat.	2	4	0
6	7	9	2010	0	32	JPR	9	4	1	1	1	2	1			Cat IV	3	3	3	3	NEGATIVE						7	DTC Jaipur I	43	3								0.67			0	0				UNAVAIL	2		0
6	7	10	2010	1	29	BLW	2	6	1	1	1	2	1			Cat IV	2	9	2	4	NEGATIVE						1	Bhilwara	60	4								0.7	1.1		0	0	1	2009	GOVERNMENT	1st Cat.	2	5	0
6	7	11	2010	1	70	JPC	2	5	1	1	1	2	2			Cat IV	2	2	2	4	NEGATIVE						1	Kanwatiya	47	4						48	48	0.5	0.6	0.7	0	0	3	2008	GOVERNMENT	2nd Cat.	2	6	0
6	7	12	2010	1	40	TNK	2	6	1	1	1	2	1			Cat IV	2	9	2	8	NEGATIVE						1	Malpura	33	2						34	40	0.7	0.4		0	0	2	2008	GOVERNMENT	2nd Cat.	2	8	0
6	7	13	2010	1	57	BLW	2	5	1	1	1	2	1			Cat IV	2	9	2	1	NEGATIVE						1	Bhilwara	79	5							78	0.7	1		0	0	4	2008	GOVERNMENT	2nd Cat.	2	8	0
6	7	14	2010	1	45	JPC	2	7	1	1	1	1	1			Cat IV	2	2	3	3	NEGATIVE						1	Choumu	45	4						46	45	0.6	0.9	1	0	0	2	2009	GOVERNMENT	2nd Cat.	2	6	1
6	7	15	2010	0	45	BLW	2	7	1	1	1	2	1			Cat IV	2	9	2	4	NEGATIVE						1	Bijoliya	46	4						38	39	0.7		0.9	0	0	2	2008	GOVERNMENT	2nd Cat.	2	2	0
6	7	16	2010	1	30	BLW	2	5	1	1	1	1	1			Cat IV	1	2	2	1	NEGATIVE						1	Bhilwara	40	3						40		0.6			0	0	3	2008	GOVERNMENT	2nd Cat.	2	8	0
6	7	17	2010	1	55	ALW	2	5	1	1	1	1	1			Cat IV	9	9	9	8	NEGATIVE						1	Behror	46	4						55	56	0.6	0.5	0.5	0	44	2	2009	GOVERNMENT	2nd Cat.	2	6	0
6	7	18	2010	1	35	JPC	2	7	1	1	1	1	1			Cat IV	2	1	2	1	NEGATIVE						1	Choumu	50	4						52	50	0.7	0.8	1.1	0	0	3	2009	GOVERNMENT	2nd Cat.	2	6	0
6	7	19	2010	1	21	JJN	1	4	1	1	1	1	1			Cat IV	9	2	2	1	NEGATIVE						1	Chirawa	33	2						55	57	0.7	1.7	0.8	0	0	4	2007	GOVERNMENT	2nd Cat.	2	8	0
6	7	20	2010	1	23	JPR	2	7	1	1	1	2	2			Cat IV	2	1	9	8	NEGATIVE						1	Purani Basti	51	4						37	39	0.6	0.8		0	0	2	2009	GOVERNMENT	2nd Cat.	2	4	0
6	7	21	2010	1	42	ALW	2	5	1	1	1	1	1			Cat IV	4	4	4	4	NEGATIVE						1	Govindgarh	40	3								0.6			0	0	3	2007	GOVERNMENT	2nd Cat.	2	6	0
6	7	22	2010	1	32	BLW	2	7	1	1	1	1	1			Cat IV	2	9	2	1	NEGATIVE						1	Gangapur	46	4						36		0.6	1		0	0	1	2009	GOVERNMENT	2nd Cat.	2	4	0
6	7	23	2010	1	50	JJN	2	5	1	1	1	2	2			Cat IV	9	2	9	1	NEGATIVE						2	Khetri	46	4						46	46	1.1	1.7	1.9	0	0	3	2008	GOVERNMENT	2nd Cat.	2	8	0
6	7	24	2010	1	40	JPC	2	6	1	1	1	1	1			Cat IV	2	9	2	8	NEGATIVE						1	Dudu	60	4			8/13/2010	Due to Kanamycin		64	62	0.6	1		0	0	2	2008	GOVERNMENT	2nd Cat.	2	9	0
6	7	25	2010	1	38	BRM	2	6	1	1	1	1	1			Cat IV	9	9	2	2	NEGATIVE						1	Barmer	58	4						58	59	0.7	0.9		0	24	3	2009	GOVERNMENT	2nd Cat.	2	6	0
6	7	26	2010	1	29	JPR	2	5	1	1	1	1	1			Cat IV	2	9	9	8	NEGATIVE						1	Amer	40	3						41	43	0.7	0.8		0	0	4	2008	GOVERNMENT	2nd Cat.	2	8	0
6	7	27	2010	1	47	JPR	2	5	1	1	1	1	1			Cat IV	2	2	9	1	NEGATIVE						1	Kotputli	46	4						46	47	0.7	0.9		0	0	3	2009	GOVERNMENT	2nd Cat.	2	2	0
6	7	28	2010	1	40	JJN	2	5	1	1	1	2	2			Cat IV	9	9	9	4	NEGATIVE						1	Jhunjhunu	46	4						46	48	0.7	0.8	0.9	0	56	3	2009	GOVERNMENT	2nd Cat.	2	6	0
6	7	29	2010	1	27	JPR	2	5	1	1	1	1	2			Cat IV	2	1	1	6	NEGATIVE						4	Sirah dyodi	46	4						46	46	0.6		0.6	0	0				UNAVAIL	2		0
6	7	30	2010	1	40	AJM	1	6	1	1	1	1	2			Cat IV	1	9	9	8	NEGATIVE						1	Kenkri	45	4						44	44	0.7	0.8	0.8	3	0	1	2009	GOVERNMENT	2nd Cat.	2	6	0
6	7	31	2010	1	35	SRH	2	6	1	1	1	2	1			Cat IV	2	2	9	8	NEGATIVE						1	Aburoad	41	3						45	45	0.6	1.1		1	72	4	2008	GOVERNMENT	2nd Cat.	2	8	0
6	7	32	2010	0	18	JPR	2	5	1	1	2	2	2			Cat IV	2	1	3	3	NEGATIVE						6	Purani Basti	32	2						36	36		1.1		8	0	3	2008	GOVERNMENT	2nd Cat.	2	8	0
6	7	33	2010	1	40	JPR	2	7	1	1	1	2	1			Cat IV	4	4	4	4	NEGATIVE						1	DTC- I Jaipur	53	4								0.7			5	2	3	2008	GOVERNMENT	2nd Cat.	2	6	0
6	7	34	2010	1	35	JPR	2	6	1	1	1	1	1			Cat IV	2	9	9	8	NEGATIVE						1	Shahpura	41	3						44	45		1		0	0	2	2009	GOVERNMENT	1st Cat.	2	3	0
6	7	35	2010	1	28	TNK	2	7	1	1	1	2	1			Cat IV	9	9	1	8	NEGATIVE						1	Tonk	47	4						46	46	0.6	1.1		0	0	2	2009	GOVERNMENT	2nd Cat.	2	8	1
6	7	36	2010	1	40	TNK	2	6	1	1	1	1	2			Cat IV	9	9	1	8	NEGATIVE						1	Tonk	37	3						38	38	0.9	0.5		0	0	2	2009	GOVERNMENT	2nd Cat.	2	8	0
6	7	37	2010	0	35	SRH	2	7	1	1	1	1	1			Cat IV	2	9	2	8	POSITIVE						1	Sirohi	40	3						38	37	0.7	0.6	0.7	6	0	3	2009	GOVERNMENT	2nd Cat.	2	8	0
6	7	38	2010	1	40	TNK	2	5	1	1	1	2	1			Cat IV	9	9	2	8	NEGATIVE						1	Tonk	40	3						38	39	1.1	0.6	1	0	0				UNAVAIL	2		0
6	7	39	2010	1	50	JPR	2	6	1	1	1	1	1			Cat IV	1	2	2	1	NEGATIVE						1	Kotputli	47	4						48	49	0.8			0	0	3	2008	GOVERNMENT	2nd Cat.	2	8	0
6	7	40	2010	1	18	JDP	2	5	1	1	1	1	1			Cat IV	2	2	2	1	NEGATIVE						1	Bhupalgarh	40	3						45	46	0.7	0.8		0	0	4	2007	GOVERNMENT	2nd Cat.	2	6	0
6	7	41	2010	1	68	JJN	2	6	1	1	1	2	2			Cat IV	9	2	9	1	NEGATIVE						1	Jhunjhunu	48	4						49	50	1.1	2.5	1.2	0	0	2	2009	GOVERNMENT	2nd Cat.	2	6	0
6	7	42	2010	1	42	JJN	2	6	1	1	1	2	1			Cat IV	9	9	9	1	NEGATIVE						1	Chirawa	44	3						44	46	0.9	1.1	1	0	0	4	2006	GOVERNMENT	2nd Cat.	2	8	0
6	7	43	2010	1	40	JPC	2	7	1	1	1	2	1			Cat IV	2	2	9	8	NEGATIVE						1	Bani Park	47	4						46	48	0.9	0.7	1.4	0	0				UNAVAIL	2		0
6	7	44	2010	1	40	JJN	2	6	1	1	1	2	1			Cat IV	2	9	4	4	NEGATIVE						9	Jhunjhunu	41	3						47	47	1	1.7		19	0	3	2008	GOVERNMENT	2nd Cat.	2	8	0
6	7	45	2010	0	43	JJN	2	6	1	1	1	2	1			Cat IV	9	4	4	4	NEGATIVE						1	Khetri	41	3						46	50	0.8	0.7	0.9	0	0	4	2007	GOVERNMENT	2nd Cat.	2	6	0
6	7	46	2010	0	17	JJN	2	6	1	1	1	1	1			Cat IV	9	2	9	1	NEGATIVE						1	Jhunjhunu	49	4						46	40	0.8			3	0	2	2009	GOVERNMENT	1st Cat.	2	6	0
6	7	47	2010	1	35	JSM	2	5	1	1	1	1	1			Cat IV	9	9	9	8	NEGATIVE						1	Jaisalmer	48	4						54		0.6			0	0				UNAVAIL	2		0
6	7	48	2010	1	32	JPR	2	5	1	1	1	2	1			Cat IV	2	2	9	8	NEGATIVE						1	Shahpura	44	3						50	50	0.9	1.4		0	0	2	2009	GOVERNMENT	1st Cat.	2	3	0
6	7	49	2010	1	40	NGR	1	4	1	1	1	2	1			Cat IV	2	2	2	8	POSITIVE						10	Nagaur	40	3						53	54	0.7	0.7	0.9	5	27	1	2009	GOVERNMENT	1st Cat.	2	3	0
6	7	50	2010	1	40	JDP	2	5	1	1	1	2	1			Cat IV	4	4	4	4	NEGATIVE						1	Mathania	48	4								0.6			0	0	4	2010	GOVERNMENT	2nd Cat.	2	6	1
6	7	51	2010	1	38	DSA	2	5	1	1	1	2	1			Cat IV	2	2	2	1	NEGATIVE						1	Bandikui	74	5						75	80	0.7			0	0	3	2007	GOVERNMENT	2nd Cat.	2	8	0
6	7	52	2010	1	25	JDP	2	5	1	1	1	2	1			Cat IV	9	9	2	8	NEGATIVE						1	Pipad City	48	4						55	55	0.7	0.9	0.9	1	1	1	2009	GOVERNMENT	2nd Cat.	2	8	0
6	7	53	2010	1	50	NGR	2	5	1	1	1	1	1			Cat IV	4	4	4	4	NEGATIVE						3	Kuchaman city	46	4						46	47	0.7	0.5		0	0	2	2009	GOVERNMENT	2nd Cat.	2	6	0
6	7	54	2010	1	34	NGR	2	5	1	1	1	2	1			Cat IV	2	2	2	8	NEGATIVE						1	Merta City	50	4						50	52	0.7	0.6	0.7	0	0				UNAVAIL	2		0
6	7	55	2010	1	52	JPR	3	6	1	1	1	2	2			Cat IV	2	9	2	8	NEGATIVE						9	Purani Basti	38	3						40	40	0.6	0.5		5	0	2	2009	GOVERNMENT	2nd Cat.	2	5	0
6	7	56	2010	0	24	JPC	2	7	1	1	1	1	1			Cat IV	2	2	9	8	NEGATIVE						1	Purani Basti	35	3						36	35	0.7	0.8		0	0	2	2009	GOVERNMENT	2nd Cat.	2	4	0
6	7	57	2010	1	36	BRM	2	6	1	1	1	2	1			Cat IV	9	2	9	8	NEGATIVE						1	Sanchore	50	4						52	53	0.6			15	0	3	2009	GOVERNMENT	2nd Cat.	2	4	0
6	7	58	2010	1	35	BLW	2	5	1	1	1	1	1			Cat IV	9	9	2	8	NEGATIVE						1	Mandalgarh	54	4								0.6			0	0	2	2008	GOVERNMENT	2nd Cat.	2	5	0
6	7	59	2010	1	42	JDP	2	7	1	1	1	1	1			Cat IV	4	9	4	4	NEGATIVE						1	Bhupalgarh	69	5								0.6			0	0	2	2008	GOVERNMENT	Non dots	2	6	0
6	7	60	2010	1	35	AJM	2	5	1	1	1	1	1			Cat IV	2	2	2	8	NEGATIVE						1	Ajmer	51	4						54	53	0.6	1.2	1	0	0	3	2008	GOVERNMENT	2nd Cat.	2	8	0
6	7	61	2010	0	42	PLI	2	6	1	1	1	2	1			Cat IV	9	9	1	8	NEGATIVE						10	Pali	40	3						42	42	0.9	0.8		1	0	3	2009	GOVERNMENT	2nd Cat.	2	8	0
6	7	62	2010	0	45	JPC	2	7	1	1	1	2	2			Cat IV	1	1	3	3	NEGATIVE						1	Dudu	34	2								0.9			0	0	4	2007	GOVERNMENT	2nd Cat.	2	5	0
6	7	63	2010	1	32	JJN	2	7	1	1	1	1	1			Cat IV	3	3	3	3	NEGATIVE						1	Jhunjhunu	40	3						41	43	0.7			0	0	3	2009	GOVERNMENT	2nd Cat.	2	6	0
6	7	64	2010	1	40	BLW	2	5	1	1	1	1	1			Cat IV	3	3	3	3	NEGATIVE						1	Bhilwara	43	3								0.7			0	0	2	2009	GOVERNMENT	2nd Cat.	2	5	0
6	7	66	2010	1	40	JLR	2	5	1	1	1	1	1			Cat IV	9	2	4	4	NEGATIVE						1	Raniwara	38	3			7/27/2010	due to kanamycin		38	39	0.6			0	0	2	2009	GOVERNMENT	2nd Cat.	2	5	0
6	7	67	2010	1	28	TNK	2	5	1	1	1	2	2			Cat IV	9	2	9	8	NEGATIVE						1	Malpura	50	4						50	50	0.6	0.6		0	0	2	2009	GOVERNMENT	2nd Cat.	2	4	0
6	7	68	2010	1	22	BRM	2	7	1	1	1	1	1			Cat IV	2	2	2	3	NEGATIVE						1	Chohtan	39	3						40	41	0.8	1.2	0.8	0	0	3	2009	GOVERNMENT	2nd Cat.	2	4	0
6	7	69	2010	1	17	SRH	2	6	1	1	1	2	2			Cat IV	2	2	4	8	NEGATIVE						4	Reodar	27	2						31		1	1		4	0	2	2010	GOVERNMENT	2nd Cat.	2	5	0
6	7	70	2010	1	26	NGR	2	6	1	1	1	1	1			Cat IV	9	2	2	8	NEGATIVE						1	Kuchaman city	31	2						36	36	0.8	0.6	0.6	0	0	2	2008	GOVERNMENT	1st Cat.	2	6	0
6	7	71	2010	1	55	JPR	2	5	1	1	1	1	1			Cat IV	9	3	3	3	NEGATIVE						1	Kotputli	49	4						48		0.8	1.6		0	0	3	2009	GOVERNMENT	2nd Cat.	2	2	0
6	7	72	2010	0	35	BRM	2	7	1	1	1	1	1			Cat IV	2	9	2	8	NEGATIVE						1	Shiv	55	4						59	60	0.7	0.8	0.9	17	4	3	2008	GOVERNMENT	2nd Cat.	2	8	0
6	7	73	2010	1	55	BLW	2	5	1	1	1	1	2			Cat IV	9	2	3	3	NEGATIVE						1	Mandalgarh	40	3								0.7			0	0	2	2009	GOVERNMENT	2nd Cat.	2	12	0
[truncated: 1,721 more rows]
[truncated: 70 more columns]
